# Supplementary material for: GATA4 regulates mitochondrial biogenesis and functions during cardiac development and rescues cardiac and mitochondrial functions impaired by TKIs
Source: Research Square preprint supplement (doi:10.21203/rs.3.rs-2343653/v1), 2022-12-09
Supplement: Supplementary file 2 [file 98f07193b0854e27b6eed2ef.xlsx]

## Sheet: Control.vs.Sunitinib_day20
seqnames	start	end	width	strand	Conc	Conc_day20_S.	Conc_day20_C	Fold	p.value	FDR	peak	feature	start_position	end_position	feature_strand	insideFeature	distancetoFeature	shortestDistance	fromOverlappingOrNearest	symbol
chr22	38902212	38902612	401	*	10.2953	9.44742	10.8257	-1.37369	5.89793e-102	2.75198e-98	2754	ENSG00000100201	38879445	38903665	-	inside	1453	1053	NearestLocation	DDX17
chr8	21776910	21777310	401	*	9.37765	8.38957	9.95862	-1.56053	1.1836e-81	2.76134e-78	4224	ENSG00000130227	21777180	21864096	+	overlapStart	-270	130	NearestLocation	XPO7
chr9	126030991	126031391	401	*	9.90687	9.11182	10.4165	-1.29932	1.70498e-80	2.65182e-77	4572	ENSG00000165209	125871779	126030855	-	upstream	-136	136	NearestLocation	STRBP
chr2	149402799	149403199	401	*	10.1147	9.37193	10.6026	-1.22593	1.65015e-78	1.9249e-75	2390	ENSG00000135999	149402009	149545130	+	inside	790	790	NearestLocation	EPC2
chr2	196521718	196522118	401	*	10.7452	10.0717	11.2025	-1.12727	5.99519e-76	5.59471e-73	2469	ENSG00000201813	196535096	196535198	-	downstream	13480	12978	NearestLocation	RNU6-915P
chr7	35840563	35840963	401	*	9.41072	8.53476	9.95185	-1.40904	2.00364e-71	1.55816e-68	4005	ENSG00000122545	35840542	35944917	+	inside	21	21	NearestLocation	SEPTIN7
chr7	26240313	26240713	401	*	10.8324	10.1741	11.2828	-1.10499	3.82056e-70	2.54667e-67	3988	ENSG00000122565	26240782	26252976	+	upstream	-469	69	NearestLocation	CBX3
chr10	97416347	97416747	401	*	9.51552	8.75594	10.0105	-1.24828	8.91492e-63	5.19963e-60	653	ENSG00000059573	97365696	97416463	-	overlapStart	116	116	NearestLocation	ALDH18A1
chr1	27560850	27561250	401	*	8.93688	7.9909	9.50338	-1.5007	5.92304e-59	3.07077e-56	71	ENSG00000142784	27561007	27635110	+	overlapStart	-157	157	NearestLocation	WDTC1
chr6	34360288	34360688	401	*	10.2245	9.61078	10.6538	-1.03872	5.99907e-54	2.71304e-51	3714	ENSG00000272325	34247456	34360451	-	overlapStart	163	163	NearestLocation	NUDT3
chr14	95623639	95624039	401	*	10.1254	9.45694	10.5805	-1.11842	6.39594e-54	2.71304e-51	1468	ENSG00000235706	95623982	95646263	+	overlapStart	-343	57	NearestLocation	DICER1-AS1
chr11	72533106	72533506	401	*	8.56285	7.54549	9.15356	-1.59204	1.52056e-50	5.91246e-48	842	ENSG00000168010	72525353	72554719	+	inside	7753	7753	NearestLocation	ATG16L2
chr9	130829399	130829799	401	*	8.8587	8.02566	9.38342	-1.34795	8.33468e-49	2.99151e-46	4583	ENSG00000148339	130830480	130871524	+	upstream	-1081	681	NearestLocation	SLC25A25
chr3	119813229	119813629	401	*	8.55848	7.63172	9.11818	-1.47314	9.57327e-46	3.19064e-43	2960	ENSG00000082701	119540170	119813264	-	overlapStart	35	35	NearestLocation	GSK3B
chr1	27816632	27817032	401	*	8.80864	8.03567	9.30923	-1.26468	3.61129e-43	1.12335e-40	72	ENSG00000158195	27730730	27816669	-	overlapStart	37	37	NearestLocation	WASF2
chr11	61447617	61448017	401	*	10.0165	9.52262	10.3838	-0.857888	1.50761e-42	4.39657e-40	821	ENSG00000134780	61447905	61514473	+	overlapStart	-288	112	NearestLocation	DAGLA
chr11	64053031	64053431	401	*	10.58	10.085	10.9479	-0.859756	5.93877e-40	1.63002e-37	829	ENSG00000002330	64037302	64052176	-	upstream	-855	855	NearestLocation	BAD
chr17	7145638	7146038	401	*	9.38684	8.8534	9.77542	-0.917125	5.30409e-36	1.37494e-33	1797	ENSG00000170296	7143333	7146089	-	inside	451	51	NearestLocation	GABARAP
chr4	166248321	166248721	401	*	8.59356	7.90262	9.05879	-1.14622	1.62638e-32	3.99404e-30	3314	ENSG00000052802	166248775	166264312	+	upstream	-454	54	NearestLocation	MSMO1
chr2	109816015	109816415	401	*	6.00774	6.84159	3.80723	2.88322	2.53252e-31	5.90836e-29	2336	ENSG00000228551	109867878	109868102	+	upstream	-51863	51463	NearestLocation	NA
chr16	577549	577949	401	*	8.62466	7.97556	9.07072	-1.08517	2.52934e-30	5.61994e-28	1645	ENSG00000103326	577717	604636	+	overlapStart	-168	168	NearestLocation	CAPN15
chr9	103360977	103361377	401	*	7.70845	6.70177	8.29563	-1.56609	3.01763e-29	6.40012e-27	4543	ENSG00000200966	103343361	103343661	-	upstream	-17316	17316	NearestLocation	NA
chr11	77532009	77532409	401	*	7.8861	6.9903	8.43459	-1.4242	1.1612e-28	2.35571e-26	850	ENSG00000048649	77371041	77532063	-	overlapStart	54	54	NearestLocation	RSF1
chr2	190648880	190649280	401	*	7.92562	7.07881	8.45568	-1.35819	1.91847e-27	3.72983e-25	2460	ENSG00000064933	190649107	190742355	+	overlapStart	-227	173	NearestLocation	PMS1
chr6	167412628	167413028	401	*	7.98343	7.17091	8.50007	-1.31154	4.53878e-27	8.47119e-25	3951	ENSG00000213066	167412670	167466201	+	overlapStart	-42	42	NearestLocation	CEP43
chr1	206137613	206138013	401	*	7.94366	7.16238	8.44767	-1.2699	2.85212e-25	5.11846e-23	385	ENSG00000229874	206135293	206137984	-	overlapStart	371	29	NearestLocation	NA
chr13	32420722	32421122	401	*	7.57357	6.66424	8.12699	-1.43707	4.42296e-24	7.64353e-22	1231	ENSG00000229715	32420978	32527609	+	overlapStart	-256	144	NearestLocation	NA
chr6	78499384	78499784	401	*	5.85227	6.59988	4.21286	2.2836	1.15504e-22	1.9248e-20	3777	ENSG00000269964	78400375	78636691	+	inside	99009	99009	NearestLocation	MEI4
chr18	51750794	51751194	401	*	7.26728	6.24096	7.86091	-1.58379	1.88819e-22	3.03803e-20	2012	ENSG00000134046	51679079	51751158	-	overlapStart	364	36	NearestLocation	MBD2
chr16	53737816	53738216	401	*	7.30028	6.32315	7.87754	-1.52164	7.93087e-22	1.23351e-19	1694	ENSG00000103494	53631595	53737850	-	overlapStart	34	34	NearestLocation	RPGRIP1L
chr5	56111112	56111512	401	*	8.36948	7.80255	8.77542	-0.963707	9.24461e-22	1.39146e-19	3428	ENSG00000095015	56111401	56191979	+	overlapStart	-289	111	NearestLocation	MAP3K1
chr8	66754117	66754517	401	*	7.64573	6.86478	8.1496	-1.26687	2.78348e-21	4.05866e-19	4286	ENSG00000205268	66629745	66754557	-	inside	440	40	NearestLocation	PDE7A
chr10	14935026	14935426	401	*	5.71885	6.46055	4.10996	2.22195	5.81296e-20	8.21917e-18	493	ENSG00000152455	14920819	14946314	+	inside	14207	10888	NearestLocation	SUV39H2
chrX	154739906	154740306	401	*	5.63738	6.3997	3.91849	2.35261	9.7234e-20	1.33439e-17	4661	ENSG00000225393	154697947	154716707	+	downstream	41959	23199	NearestLocation	NA
chr5	172828985	172829385	401	*	5.80545	6.51699	4.34131	2.0845	1.23131e-19	1.64151e-17	3639	ENSG00000253968	172841038	172878168	+	upstream	-12053	11653	NearestLocation	NA
chr20	443057	443457	401	*	6.88075	5.78448	7.49643	-1.65965	1.10682e-18	1.43456e-16	2553	ENSG00000125875	416124	443197	-	overlapStart	140	140	NearestLocation	TBC1D20
chr2	197932401	197932801	401	*	5.85714	6.53155	4.54977	1.90754	3.51223e-18	4.42921e-16	2471	ENSG00000224442	197893435	197894867	-	upstream	-37534	37534	NearestLocation	NA
chr8	40719979	40720379	401	*	5.32673	6.13358	3.33029	2.57981	5.27602e-18	6.47839e-16	4253	ENSG00000165061	40388109	40755352	-	inside	35373	34973	NearestLocation	ZMAT4
chrX	151585956	151586356	401	*	5.25968	6.07947	3.16951	2.65632	7.22062e-18	8.63883e-16	4658	ENSG00000207818	151562884	151562964	-	upstream	-22992	22992	NearestLocation	MIR105-2
chr2	57419734	57420134	401	*	5.55203	6.29024	3.96081	2.19038	1.37425e-17	1.60307e-15	2266	ENSG00000271115	57275485	57276471	-	upstream	-143263	143263	NearestLocation	NA
chr16	74548840	74549240	401	*	5.30236	6.09804	3.38156	2.50632	1.83837e-17	2.09215e-15	1734	ENSG00000240861	74586149	74586644	+	upstream	-37309	36909	NearestLocation	RPS10P23
chr20	25090856	25091256	401	*	5.30075	6.09748	3.37299	2.50625	1.94381e-17	2.15948e-15	2594	ENSG00000225069	25079741	25080564	+	downstream	11115	10292	NearestLocation	NA
chrY	15423222	15423622	401	*	5.56045	6.29024	4.01079	2.16121	2.47095e-17	2.68127e-15	4664	ENSG00000269291	15418467	15429181	+	inside	4755	4755	NearestLocation	NA
chr17	73851408	73851808	401	*	6.92444	5.9394	7.50439	-1.52211	2.53961e-17	2.69314e-15	1916	ENSG00000132471	73841780	73852588	-	inside	1180	780	NearestLocation	WBP2
chr20	13418499	13418899	401	*	5.20742	6.02149	3.15959	2.59896	6.65862e-17	6.90425e-15	2574	ENSG00000236811	13373324	13374321	+	downstream	45175	44178	NearestLocation	NA
chr3	149687758	149688158	401	*	7.95923	7.40023	8.36111	-0.9505	1.28148e-16	1.29986e-14	3005	ENSG00000268175	149689066	149690535	+	upstream	-1308	908	NearestLocation	NA
chr2	156998891	156999291	401	*	5.27749	6.06084	3.43518	2.42769	1.69259e-16	1.68034e-14	2395	ENSG00000235548	156889759	156890592	-	upstream	-108299	108299	NearestLocation	NA
chr2	186705042	186705442	401	*	5.29498	6.0597	3.56263	2.31762	4.53127e-16	4.40478e-14	2449	ENSG00000231646	186648418	186664878	-	upstream	-40164	40164	NearestLocation	FSIP2-AS1
chr10	17272347	17272747	401	*	7.15033	6.355	7.66007	-1.27912	6.94726e-16	6.61549e-14	497	ENSG00000229124	17256238	17271984	-	upstream	-363	363	NearestLocation	VIM-AS1
chr2	49532016	49532416	401	*	5.31149	6.06084	3.66297	2.24159	3.06847e-15	2.86349e-13	2253	ENSG00000206915	49460933	49461038	-	upstream	-70978	70978	NearestLocation	RNU6-439P
chr5	119839424	119839824	401	*	5.20462	5.96046	3.52139	2.2573	8.93213e-15	8.17203e-13	3525	ENSG00000184838	119799973	120023027	+	inside	39451	39451	NearestLocation	PRR16
chr2	162764842	162765242	401	*	5.02677	5.8303	3.05321	2.50645	1.21075e-14	1.08642e-12	2412	ENSG00000253046	162775292	162775376	+	upstream	-10450	10050	NearestLocation	NA
chr10	93668193	93668593	401	*	7.04776	6.27433	7.54854	-1.2428	2.47933e-14	2.18274e-12	645	ENSG00000272817	93667888	93669105	+	inside	305	305	NearestLocation	NA
chrY	4975759	4976159	401	*	4.99531	5.78471	3.1151	2.41551	7.0682e-14	6.10745e-12	4663	ENSG00000252468	4887117	4887307	+	downstream	88642	88452	NearestLocation	RNU2-57P
chr3	167452250	167452650	401	*	6.65216	5.73787	7.20739	-1.42359	1.51102e-13	1.2819e-11	3027	ENSG00000114209	167401086	167452727	-	inside	477	77	NearestLocation	PDCD10
chr2	144558648	144559048	401	*	5.08233	5.83142	3.43518	2.2064	2.61298e-13	2.17717e-11	2387	ENSG00000236356	144557036	144577168	+	inside	1612	1612	NearestLocation	NA
chr17	61850743	61851143	401	*	6.98592	6.24045	7.47498	-1.20486	2.97114e-13	2.43217e-11	1901	ENSG00000198231	61850963	61896677	+	overlapStart	-220	180	NearestLocation	DDX42
chr4	114900576	114900976	401	*	7.16112	6.48869	7.61798	-1.10711	4.35119e-13	3.50046e-11	3239	ENSG00000180801	114821440	114900883	-	overlapStart	307	93	NearestLocation	ARSJ
chr1	46152232	46152632	401	*	6.09258	4.83142	6.75505	-1.81493	7.50363e-13	5.93423e-11	118	ENSG00000159596	46152886	46160115	+	upstream	-654	254	NearestLocation	TMEM69
chr19	38806313	38806713	401	*	6.9396	6.20593	7.42362	-1.1929	9.48561e-13	7.37664e-11	2109	ENSG00000167645	38795753	38807913	-	inside	1600	1200	NearestLocation	YIF1B
chr2	32225353	32225753	401	*	5.2176	5.91844	3.80086	1.97716	1.07362e-12	8.21235e-11	2217	ENSG00000162959	32090129	32236299	-	inside	10946	10546	NearestLocation	MEMO1
chr2	202771933	202772333	401	*	5.92828	4.53086	6.62462	-1.95411	1.6482e-12	1.24041e-10	2483	ENSG00000212184	202792162	202792266	+	upstream	-20229	19829	NearestLocation	RNU6-440P
chr9	21402828	21403228	401	*	6.15738	5.00209	6.79061	-1.69886	1.82071e-12	1.34848e-10	4441	ENSG00000235108	21403080	21403650	+	overlapStart	-252	148	NearestLocation	NA
chr8	16859159	16859559	401	*	6.69233	5.87559	7.21064	-1.29692	2.60199e-12	1.89701e-10	4214	ENSG00000078579	16849678	16859690	-	inside	531	131	NearestLocation	FGF20
chr1	246165674	246166074	401	*	4.96548	5.71398	3.32141	2.17047	4.72557e-12	3.39223e-10	469	ENSG00000235096	246196853	246198905	+	upstream	-31179	30779	NearestLocation	NA
chr10	112444856	112445256	401	*	6.24844	5.22329	6.84169	-1.55275	6.41596e-12	4.53589e-10	689	ENSG00000203867	112404155	112599227	+	inside	40701	40701	NearestLocation	RBM20
chr10	112444856	112445256	401	*	6.24844	5.22329	6.84169	-1.55275	6.41596e-12	4.53589e-10	689	LRG_382	112404155	112599227	+	inside	40701	40701	NearestLocation	NA
chr2	209728179	209728579	401	*	4.85274	5.63961	2.98854	2.35321	8.4323e-12	5.8724e-10	2490	ENSG00000202164	209785271	209785388	-	downstream	57209	56692	NearestLocation	RNA5SP117
chr19	10828950	10829350	401	*	7.42487	6.8861	7.81625	-0.913434	1.45246e-11	9.96641e-10	2069	ENSG00000207972	10829080	10829179	+	includeFeature	-130	130	NearestLocation	MIR638
chr1	85039805	85040205	401	*	5.86041	4.53142	6.54024	-1.87451	1.58579e-11	1.06245e-09	184	ENSG00000117151	85015289	85040163	-	overlapStart	358	42	NearestLocation	CTBS
chr5	80330028	80330428	401	*	4.81013	5.58639	3.01079	2.30803	1.5939e-11	1.06245e-09	3472	ENSG00000251001	80293002	80293866	-	upstream	-36162	36162	NearestLocation	NA
chr1	211799319	211799719	401	*	5.12018	5.8086	3.75612	1.90155	2.31405e-11	1.52076e-09	397	ENSG00000227764	211813037	211827923	+	upstream	-13718	13318	NearestLocation	LINC01693
chr10	43133542	43133942	401	*	6.17375	5.15326	6.76547	-1.5395	2.75775e-11	1.78718e-09	545	ENSG00000196693	43084555	43133992	-	inside	450	50	NearestLocation	ZNF33B
chrX	84124473	84124873	401	*	4.82693	5.58613	3.12534	2.21671	2.94695e-11	1.88362e-09	4642	ENSG00000229547	84189157	84189896	+	upstream	-64684	64284	NearestLocation	UBE2DNL
chr2	236396713	236397113	401	*	5.57379	6.17038	4.53833	1.55192	3.80677e-11	2.40032e-09	2543	ENSG00000157985	236402733	237040444	+	upstream	-6020	5620	NearestLocation	AGAP1
chrX	72920845	72921245	401	*	4.80209	5.55957	3.10996	2.18719	8.98097e-11	5.58736e-09	4640	ENSG00000230146	72989083	72990258	+	upstream	-68238	67838	NearestLocation	NA
chr1	227058128	227058528	401	*	6.11434	5.11693	6.69844	-1.50939	1.14653e-10	7.03908e-09	428	ENSG00000143801	227057885	227083806	+	inside	243	243	NearestLocation	PSEN2
chr2	238503591	238503991	401	*	5.97073	4.87559	6.58606	-1.61574	1.39169e-10	8.43329e-09	2546	ENSG00000234949	238499663	238504624	+	inside	3928	633	NearestLocation	LOC105373958
chr7	151223220	151223620	401	*	4.5564	5.38602	2.39007	2.54545	1.50821e-10	9.02219e-09	4168	ENSG00000106615	151163098	151217206	-	upstream	-6014	6014	NearestLocation	RHEB
chr5	64317379	64317779	401	*	6.13096	5.15398	6.70817	-1.48076	1.65926e-10	9.80016e-09	3442	ENSG00000272354	64316441	64316816	+	downstream	938	563	NearestLocation	NA
chr1	146439737	146440137	401	*	4.78867	5.53142	3.17445	2.11785	2.05165e-10	1.19663e-08	254	ENSG00000234225	146473490	146475177	-	downstream	35440	33353	NearestLocation	NA
chr6	41862985	41863385	401	*	6.21023	5.32235	6.75579	-1.37467	4.59921e-10	2.64937e-08	3729	ENSG00000164663	41757634	41863099	-	overlapStart	114	114	NearestLocation	USP49
chr8	55850423	55850823	401	*	6.51295	5.7616	7.0045	-1.20286	4.72127e-10	2.68652e-08	4272	ENSG00000206579	56014949	56454613	+	upstream	-164526	164126	NearestLocation	XKR4
chr11	12180455	12180855	401	*	6.05281	5.0774	6.62948	-1.47709	4.83443e-10	2.71776e-08	751	ENSG00000133816	12115543	12285334	+	inside	64912	64912	NearestLocation	MICALCL;MICAL2
chr2	216973782	216974182	401	*	6.50733	5.76206	6.9963	-1.19524	6.15585e-10	3.41943e-08	2504	ENSG00000079246	216972187	217071026	+	inside	1595	1595	NearestLocation	XRCC5
chr1	120838133	120838533	401	*	6.51508	5.78563	6.99728	-1.17685	8.66638e-10	4.75734e-08	243	ENSG00000236933	120835810	120838343	-	overlapStart	210	190	NearestLocation	NA
chr12	30907890	30908290	401	*	6.76099	6.11619	7.20504	-1.06034	9.39692e-10	5.09838e-08	1019	ENSG00000246331	30908008	30933673	+	overlapStart	-118	118	NearestLocation	LOC645485
chr4	154073166	154073566	401	*	6.17344	5.29008	6.71733	-1.3638	9.5429e-10	5.11806e-08	3295	ENSG00000109654	154073494	154260472	+	overlapStart	-328	72	NearestLocation	TRIM2
chr6	91006451	91006851	401	*	6.1508	5.25707	6.69852	-1.37585	9.99163e-10	5.29784e-08	3800	ENSG00000112182	90636248	91006627	-	overlapStart	176	176	NearestLocation	BACH2
chr12	4161969	4162369	401	*	5.72233	4.53307	6.36524	-1.70627	1.30936e-09	6.86456e-08	975	ENSG00000256969	4130143	4135824	+	downstream	31826	26145	NearestLocation	NA
chr9	139981182	139981582	401	*	5.5268	4.15362	6.21741	-1.88382	1.74142e-09	9.02831e-08	4604	ENSG00000177239	139981379	140003635	+	overlapStart	-197	197	NearestLocation	MAN1B1
chr11	35719451	35719851	401	*	4.97901	5.6391	3.72686	1.76614	2.31261e-09	1.18578e-07	791	ENSG00000166326	35684353	35829775	+	inside	35098	35098	NearestLocation	TRIM44
chr10	80347989	80348389	401	*	6.30263	5.53169	6.80237	-1.22466	3.76666e-09	1.91035e-07	615	ENSG00000228683	80455819	80456779	-	downstream	108790	107430	NearestLocation	NA
chr3	14247394	14247794	401	*	4.70485	5.44583	3.09961	2.06368	4.39746e-09	2.2063e-07	2798	ENSG00000154767	14186647	14220283	-	upstream	-27111	27111	NearestLocation	XPC
chr17	1098253	1098653	401	*	4.42248	5.22397	2.46288	2.32044	7.59625e-09	3.77065e-07	1778	ENSG00000235361	1085187	1088380	+	downstream	13066	9873	NearestLocation	NA
chr9	87283086	87283486	401	*	5.71801	4.63782	6.32874	-1.57902	8.08618e-09	3.96658e-07	4508	ENSG00000148053	87283466	87638505	+	overlapStart	-380	20	NearestLocation	NTRK2
chr8	22842683	22843083	401	*	5.42709	4.08003	6.11138	-1.84611	8.16099e-09	3.96658e-07	4228	ENSG00000008853	22844930	22877712	+	upstream	-2247	1847	NearestLocation	RHOBTB2
chr22	28309149	28309549	401	*	5.52927	4.28976	6.18598	-1.73937	9.1264e-09	4.39008e-07	2730	ENSG00000235954	28315364	28404569	+	upstream	-6215	5815	NearestLocation	TTC28-AS1
chr16	15905523	15905923	401	*	5.79398	4.78448	6.38209	-1.50254	9.84485e-09	4.68736e-07	1664	ENSG00000133392	15797029	15950890	-	inside	45367	44967	NearestLocation	MYH11
chr10	2675804	2676204	401	*	6.39109	5.68945	6.8611	-1.13197	1.16099e-08	5.47192e-07	476	ENSG00000235281	2543975	2609431	+	downstream	131829	66373	NearestLocation	NA
chr2	40739472	40739872	401	*	6.03465	5.18835	6.56451	-1.31236	1.32501e-08	6.18251e-07	2237	ENSG00000183023	40324410	40838193	-	inside	98721	98321	NearestLocation	SLC8A1
chr14	67708170	67708570	401	*	6.23193	5.47455	6.72602	-1.20169	1.39636e-08	6.43071e-07	1422	ENSG00000072415	67707826	67802536	+	inside	344	344	NearestLocation	MPP5
chr15	47476505	47476905	401	*	5.61343	4.47626	6.24136	-1.63451	1.40577e-08	6.43071e-07	1536	ENSG00000137872	47476298	48066420	+	inside	207	207	NearestLocation	SEMA6D
chr19	52097493	52097893	401	*	6.53975	5.89696	6.98286	-1.05519	1.45351e-08	6.58453e-07	2144	ENSG00000269388	52097814	52109403	+	overlapStart	-321	79	NearestLocation	NA
chr13	95085910	95086310	401	*	5.98311	5.11729	6.52042	-1.33699	1.51344e-08	6.79012e-07	1319	ENSG00000212057	95117554	95117644	-	downstream	31734	31244	NearestLocation	NA
chr15	35089016	35089416	401	*	5.46937	4.22363	6.12775	-1.74244	1.6125e-08	7.16565e-07	1507	ENSG00000159251	35080297	35088340	-	upstream	-676	676	NearestLocation	ACTC1
chr7	137942283	137942683	401	*	6.20453	5.44554	6.69929	-1.20579	1.68486e-08	7.41656e-07	4147	ENSG00000213238	137982833	137983229	-	downstream	40946	40150	NearestLocation	RPS17P12
chr3	119137048	119137448	401	*	6.18535	5.41564	6.68458	-1.21478	1.77773e-08	7.75225e-07	2957	ENSG00000176142	119148347	119187677	-	downstream	50629	10899	NearestLocation	TMEM39A
chr16	28561415	28561815	401	*	4.27274	5.07815	2.28628	2.32625	1.84708e-08	7.98007e-07	1673	ENSG00000271495	28559652	28559979	-	upstream	-1436	1436	NearestLocation	NA
chr7	90893699	90894099	401	*	5.42569	4.15362	6.09103	-1.76636	1.94113e-08	8.30945e-07	4075	ENSG00000157240	90893783	90898123	+	overlapStart	-84	84	NearestLocation	FZD1
chr3	146262160	146262560	401	*	5.45084	4.22295	6.10441	-1.72199	2.44283e-08	1.0362e-06	3003	ENSG00000188313	146232967	146262651	-	inside	491	91	NearestLocation	PLSCR1
chr10	92690878	92691278	401	*	7.36061	6.92864	7.6926	-0.750002	2.56541e-08	1.0784e-06	640	ENSG00000201604	92682488	92682592	-	upstream	-8286	8286	NearestLocation	RNU6-740P
chr2	121832684	121833084	401	*	5.26179	5.83008	4.3107	1.43385	2.81338e-08	1.17208e-06	2359	ENSG00000234455	121839013	121846302	-	downstream	13618	5929	NearestLocation	NA
chr6	45086553	45086953	401	*	5.16745	3.63629	5.89342	-1.98513	3.37634e-08	1.39416e-06	3737	ENSG00000219384	45126607	45127248	+	upstream	-40054	39654	NearestLocation	LOC100420052
chr9	6659841	6660241	401	*	4.93784	5.58772	3.72349	1.70276	3.87357e-08	1.58544e-06	4422	ENSG00000266863	6661651	6661936	+	upstream	-1810	1410	NearestLocation	RN7SL123P
chr2	110540195	110540595	401	*	5.88081	5.0009	6.42341	-1.34951	4.00001e-08	1.62296e-06	2338	ENSG00000015568	110550335	110615272	+	upstream	-10140	9740	NearestLocation	RGPD5
chr2	55746489	55746889	401	*	5.56113	4.47455	6.17383	-1.57638	4.77216e-08	1.91956e-06	2263	ENSG00000163001	55746740	55773015	+	overlapStart	-251	149	NearestLocation	CFAP36
chr18	34048168	34048568	401	*	6.37315	5.7135	6.82413	-1.0747	5.20201e-08	2.07458e-06	1989	ENSG00000134775	33877677	34360018	+	inside	170491	170491	NearestLocation	FHOD3
chr10	36059928	36060328	401	*	5.76491	4.82963	6.32763	-1.40926	5.87272e-08	2.30902e-06	539	ENSG00000226646	35986228	35986965	+	downstream	73700	72963	NearestLocation	RPL7P37
chr9	134206639	134207039	401	*	6.3334	5.66374	6.789	-1.08695	5.88883e-08	2.30902e-06	4591	ENSG00000160539	134165081	134184649	+	downstream	41558	21990	NearestLocation	PLPP7
chr18	56296336	56296736	401	*	5.58979	4.53307	6.19317	-1.5414	6.00452e-08	2.33476e-06	2023	ENSG00000198796	56148479	56296189	-	upstream	-147	147	NearestLocation	ALPK2
chr8	37336783	37337183	401	*	5.99162	5.18696	6.50512	-1.2551	6.09512e-08	2.3504e-06	4245	ENSG00000253388	37337607	37338327	+	upstream	-824	424	NearestLocation	NA
chr22	38613157	38613557	401	*	4.86542	5.50438	3.69011	1.66413	6.30462e-08	2.41126e-06	2753	ENSG00000256873	38616385	38617120	-	downstream	3963	2828	NearestLocation	NA
chr1	202431510	202431910	401	*	5.55115	4.47512	6.16059	-1.55715	7.79103e-08	2.95552e-06	376	ENSG00000236439	202440937	202441258	-	downstream	9748	9027	NearestLocation	NA
chr8	116308431	116308831	401	*	6.45246	5.8312	6.88531	-1.02231	8.11615e-08	3.05403e-06	4357	ENSG00000227170	116521829	116523552	+	upstream	-213398	212998	NearestLocation	NA
chr12	69201446	69201846	401	*	5.88044	5.03985	6.40809	-1.29691	9.88988e-08	3.69169e-06	1087	ENSG00000135679	69201956	69239214	+	upstream	-510	110	NearestLocation	MDM2
chr1	64386134	64386534	401	*	6.068	5.32362	6.55659	-1.18329	1.06026e-07	3.92632e-06	150	ENSG00000228056	64308862	64309356	-	upstream	-76778	76778	NearestLocation	NA
chr10	81838498	81838898	401	*	5.27153	3.99931	5.93691	-1.7458	1.09179e-07	4.01126e-06	618	ENSG00000230091	81806616	81838668	-	overlapStart	170	170	NearestLocation	NA
chr17	75467453	75467853	401	*	5.99712	5.22261	6.49835	-1.21776	1.13186e-07	4.12599e-06	1922	ENSG00000267016	75465244	75468852	-	inside	1399	999	NearestLocation	NA
chr3	14274232	14274632	401	*	5.87571	5.04024	6.40137	-1.29117	1.14177e-07	4.12985e-06	2799	ENSG00000154767	14186647	14220283	-	upstream	-53949	53949	NearestLocation	XPC
chr1	147931117	147931517	401	*	5.80183	4.91886	6.34558	-1.34321	1.21485e-07	4.36038e-06	261	ENSG00000215863	147835127	147931933	-	inside	816	416	NearestLocation	NA
chr2	8619450	8619850	401	*	5.26406	4.0017	5.92685	-1.73808	1.23806e-07	4.40977e-06	2170	ENSG00000236790	8147901	8523751	-	upstream	-95699	95699	NearestLocation	LINC00299
chr6	12969305	12969705	401	*	5.13298	3.73834	5.82867	-1.85381	1.51925e-07	5.37033e-06	3674	ENSG00000223291	12753907	12754003	+	downstream	215398	215302	NearestLocation	NA
chr2	30582661	30583061	401	*	6.16374	5.47569	6.62768	-1.11171	1.73321e-07	6.08058e-06	2210	ENSG00000235997	30569525	30575297	+	downstream	13136	7364	NearestLocation	NA
chr12	119819624	119820024	401	*	5.36223	4.22295	5.99078	-1.61645	1.87637e-07	6.4917e-06	1182	ENSG00000183273	119772517	119978852	+	inside	47107	47107	NearestLocation	CCDC60
chr2	179914756	179915156	401	*	6.30401	5.66349	6.74605	-1.04678	1.87822e-07	6.4917e-06	2446	ENSG00000163492	179694484	179914813	-	overlapStart	57	57	NearestLocation	CCDC141
chr11	45585310	45585710	401	*	5.24284	4.0017	5.89999	-1.71452	1.91877e-07	6.58308e-06	802	ENSG00000254514	45604075	45605024	+	upstream	-18765	18365	NearestLocation	NA
chr15	67471088	67471488	401	*	5.60264	4.63782	6.17568	-1.43535	2.06987e-07	7.04964e-06	1579	ENSG00000259202	67435072	67439277	-	upstream	-31811	31811	NearestLocation	NA
chr18	2894267	2894667	401	*	6.41286	5.80837	6.83757	-0.997767	2.09676e-07	7.08947e-06	1935	ENSG00000272625	2920964	2921683	+	upstream	-26697	26297	NearestLocation	NA
chr1	147124802	147125202	401	*	4.96278	5.55957	3.9267	1.50363	2.24007e-07	7.51954e-06	256	ENSG00000162836	147101453	147142618	-	inside	17816	17416	NearestLocation	ACP6
chr19	48018101	48018501	401	*	5.65897	4.73739	6.21681	-1.38674	2.41175e-07	8.03802e-06	2129	ENSG00000105402	47990894	48018497	-	overlapStart	396	4	NearestLocation	NAPA
chr21	36478603	36479003	401	*	6.23972	5.58692	6.68752	-1.06028	2.58831e-07	8.56529e-06	2670	ENSG00000234703	36508935	36511519	+	upstream	-30332	29932	NearestLocation	NA
chr14	50319626	50320026	401	*	5.30301	4.1529	5.93473	-1.62249	2.93363e-07	9.63498e-06	1392	ENSG00000165525	50249997	50319921	-	overlapStart	295	105	NearestLocation	NEMF
chr15	80683269	80683669	401	*	4.4739	5.18765	2.99971	1.90517	2.95285e-07	9.63498e-06	1615	ENSG00000259495	80637195	80695917	-	inside	12648	12248	NearestLocation	NA
chr18	39294864	39295264	401	*	4.91248	3.29106	5.65663	-2.01384	3.17735e-07	1.02955e-05	1995	ENSG00000267652	39369127	39369360	-	downstream	74496	73863	NearestLocation	NA
chr22	26158086	26158486	401	*	6.3092	5.68896	6.74156	-1.01852	3.32802e-07	1.07093e-05	2725	ENSG00000133454	26138111	26427007	+	inside	19975	19975	NearestLocation	MYO18B
chr1	206589961	206590361	401	*	5.98663	5.25674	6.46902	-1.15943	3.60733e-07	1.15286e-05	389	ENSG00000233501	206552219	206554954	-	upstream	-35007	35007	NearestLocation	NA
chr10	51974981	51975381	401	*	4.11059	4.87472	2.38156	2.08027	4.21469e-07	1.33781e-05	565	ENSG00000188611	51942538	52008370	-	inside	33389	32443	NearestLocation	ASAH2
chr1	3265624	3266024	401	*	6.92187	6.46026	7.27104	-0.793565	4.35257e-07	1.37224e-05	10	ENSG00000272235	3223200	3226660	-	upstream	-38964	38964	NearestLocation	NA
chr3	43697183	43697583	401	*	4.40352	5.11656	2.93254	1.89275	4.4967e-07	1.40816e-05	2848	ENSG00000011198	43731605	43775863	+	upstream	-34422	34022	NearestLocation	ABHD5
chr19	5894405	5894805	401	*	5.50181	4.53307	6.07621	-1.43357	5.338e-07	1.66047e-05	2056	ENSG00000266941	5899906	5901522	+	upstream	-5501	5101	NearestLocation	NA
chr18	54994878	54995278	401	*	4.17588	4.91844	2.56263	1.99316	5.92758e-07	1.83166e-05	2019	ENSG00000177511	55018044	55038962	+	upstream	-23166	22766	NearestLocation	ST8SIA3
chr10	83318598	83318998	401	*	4.45775	5.15326	3.06389	1.82763	6.5749e-07	2.01832e-05	621	ENSG00000185737	83635070	84746935	+	upstream	-316472	316072	NearestLocation	NRG3
chr1	208867494	208867894	401	*	4.25912	4.99971	2.65593	1.98911	6.64672e-07	2.02703e-05	395	ENSG00000227887	208870714	208871043	-	downstream	3549	2820	NearestLocation	NA
chr4	112657622	112658022	401	*	6.56761	6.04043	6.95287	-0.886849	7.61727e-07	2.30793e-05	3230	ENSG00000250855	112723957	112761042	+	upstream	-66335	65935	NearestLocation	NA
chr1	241280647	241281047	401	*	5.0418	3.73834	5.71522	-1.74822	7.8608e-07	2.36635e-05	459	ENSG00000265831	241295572	241295646	+	upstream	-14925	14525	NearestLocation	MIR3123
chr3	189838156	189838556	401	*	5.67607	4.83053	6.20564	-1.29135	8.43665e-07	2.52342e-05	3066	ENSG00000225764	189838753	189862635	+	upstream	-597	197	NearestLocation	P3H2-AS1
chr12	860316	860716	401	*	5.20957	4.07853	5.8357	-1.58918	9.27523e-07	2.75658e-05	960	ENSG00000060237	861759	1020618	+	upstream	-1443	1043	NearestLocation	WNK1
chr11	14006632	14007032	401	*	4.98731	3.63833	5.67207	-1.78528	9.37713e-07	2.76922e-05	757	ENSG00000152268	13983914	14289646	+	inside	22718	22718	NearestLocation	NA
chr7	37140635	37141035	401	*	5.81141	5.04024	6.31126	-1.20292	9.65881e-07	2.83446e-05	4007	ENSG00000221157	37145128	37145215	-	downstream	4580	4093	NearestLocation	NA
chr12	54385267	54385667	401	*	5.24272	5.7623	4.42279	1.2561	9.92388e-07	2.89405e-05	1065	ENSG00000207924	54385522	54385631	+	includeFeature	-255	36	NearestLocation	MIR196A2
chr11	62439030	62439430	401	*	5.07254	3.83008	5.73004	-1.69248	1.03125e-06	2.98871e-05	823	ENSG00000162194	62430287	62439727	-	inside	697	297	NearestLocation	LBHD1
chr8	127387518	127387918	401	*	6.17989	5.55876	6.61267	-1.01306	1.13171e-06	3.25961e-05	4380	ENSG00000244791	127337740	127341780	+	downstream	49778	45738	NearestLocation	LOC101927657
chr6	49882330	49882730	401	*	5.35908	4.35485	5.94545	-1.46181	1.1802e-06	3.37841e-05	3741	ENSG00000214643	49913814	49917157	-	downstream	34827	31084	NearestLocation	DEFB133
chr16	89070527	89070927	401	*	5.6915	4.87645	6.20913	-1.25757	1.20967e-06	3.44165e-05	1769	ENSG00000259989	89050440	89061777	+	downstream	20087	8750	NearestLocation	NA
chr3	69289745	69290145	401	*	4.68904	2.83098	5.47493	-2.12819	1.23492e-06	3.49221e-05	2893	ENSG00000163380	69156023	69172183	-	upstream	-117562	117562	NearestLocation	LMOD3
chr3	38574816	38575216	401	*	6.78861	6.32267	7.14023	-0.796705	1.24632e-06	3.50321e-05	2841	ENSG00000232439	38568293	38568816	-	upstream	-6000	6000	NearestLocation	RPL18AP7
chr4	12490393	12490793	401	*	5.59964	4.73834	6.13524	-1.30789	1.26849e-06	3.53401e-05	3099	ENSG00000249995	12640710	12642633	+	upstream	-150317	149917	NearestLocation	ECM1P2
chr4	76439531	76439931	401	*	5.06039	3.83098	5.71437	-1.67663	1.27243e-06	3.53401e-05	3173	ENSG00000163743	76404247	76439974	-	inside	443	43	NearestLocation	RCHY1
chr18	20051853	20052253	401	*	4.92262	3.53307	5.61712	-1.81047	1.29948e-06	3.58779e-05	1967	ENSG00000270855	19998792	19999257	-	upstream	-52596	52596	NearestLocation	ATP7BP1
chr2	72984358	72984758	401	*	5.6018	4.73787	6.1384	-1.30796	1.33575e-06	3.66625e-05	2284	ENSG00000212378	72987663	72987731	+	upstream	-3305	2905	NearestLocation	NA
chr11	45775994	45776394	401	*	5.35376	4.35485	5.93836	-1.45418	1.37571e-06	3.75383e-05	803	ENSG00000255226	45772374	45773422	-	upstream	-2572	2572	NearestLocation	NA
chr14	64108370	64108770	401	*	6.58156	6.07909	6.95351	-0.853863	1.49408e-06	4.05313e-05	1417	ENSG00000140006	64063757	64108579	-	overlapStart	209	191	NearestLocation	WDR89
chr9	124370152	124370552	401	*	5.99341	5.32331	6.4492	-1.07672	1.5449e-06	4.16224e-05	4571	ENSG00000229854	124337170	124338493	-	upstream	-31659	31659	NearestLocation	NA
chr1	12074822	12075222	401	*	4.96048	3.63935	5.63835	-1.75101	1.55214e-06	4.16224e-05	35	ENSG00000270914	12077273	12077365	-	downstream	2543	2051	NearestLocation	NA
chr12	42886177	42886577	401	*	5.0014	3.73834	5.66437	-1.70313	1.61938e-06	4.31772e-05	1032	ENSG00000258068	42879155	42883821	-	upstream	-2356	2356	NearestLocation	NA
chr14	75461479	75461879	401	*	4.86996	5.44554	3.89775	1.42278	1.73727e-06	4.60575e-05	1441	ENSG00000119718	75469614	75476292	+	upstream	-8135	7735	NearestLocation	EIF2B2
chr3	112504832	112505232	401	*	5.33938	4.35547	5.91893	-1.43856	1.78011e-06	4.69266e-05	2954	ENSG00000242770	112521325	112531666	+	upstream	-16493	16093	NearestLocation	NA
chr15	48060961	48061361	401	*	5.84082	5.11583	6.32108	-1.14558	1.82269e-06	4.77792e-05	1543	ENSG00000213862	48022341	48023132	-	upstream	-37829	37829	NearestLocation	RPL7AP62
chr5	121698098	121698498	401	*	5.45271	4.53086	6.01065	-1.3695	1.84877e-06	4.8192e-05	3529	ENSG00000249916	121705457	121719263	-	downstream	21165	6959	NearestLocation	NA
chr5	110918999	110919399	401	*	6.48378	5.96087	6.86675	-0.87813	1.86567e-06	4.83624e-05	3511	ENSG00000249619	110907799	110907936	-	upstream	-11063	11063	NearestLocation	HMGN1P13
chr16	54517074	54517474	401	*	5.91158	5.22295	6.37578	-1.10068	2.03024e-06	5.23375e-05	1698	ENSG00000264079	54583215	54583308	-	downstream	66234	65741	NearestLocation	NA
chr2	141585995	141586395	401	*	4.51058	5.18975	3.18427	1.75396	2.04501e-06	5.24285e-05	2386	ENSG00000238065	141655992	141656675	+	upstream	-69997	69597	NearestLocation	NA
chr15	84131690	84132090	401	*	5.44547	4.53197	6.00041	-1.36205	2.05638e-06	5.24319e-05	1618	ENSG00000140600	84115980	84287495	+	inside	15710	15710	NearestLocation	SH3GL3
chr5	81608871	81609271	401	*	4.98542	3.73739	5.64441	-1.68489	2.15442e-06	5.46332e-05	3475	ENSG00000205464	81575281	81682796	+	inside	33590	33590	NearestLocation	ATP6AP1L
chr19	58446572	58446972	401	*	5.70034	4.91886	6.20444	-1.21272	2.17852e-06	5.49459e-05	2155	ENSG00000196724	58433252	58446761	-	overlapStart	189	189	NearestLocation	ZNF418
chr18	34043961	34044361	401	*	5.983	5.32299	6.43415	-1.06003	2.29958e-06	5.74672e-05	1988	ENSG00000134775	33877677	34360018	+	inside	166284	166284	NearestLocation	FHOD3
chr2	74725190	74725590	401	*	5.1226	4.0017	5.74571	-1.56844	2.30312e-06	5.74672e-05	2292	ENSG00000258821	74725815	74726494	-	downstream	1304	225	NearestLocation	NA
chr7	44171739	44172139	401	*	4.93569	3.63935	5.6073	-1.72311	2.36479e-06	5.8692e-05	4015	ENSG00000252848	44165351	44165472	-	upstream	-6267	6267	NearestLocation	RNA5SP230
chr10	32734787	32735187	401	*	5.39969	4.47455	5.95881	-1.37353	2.47487e-06	6.10991e-05	531	ENSG00000216937	32735068	32863492	+	overlapStart	-281	119	NearestLocation	CCDC7
chr18	33947092	33947492	401	*	4.92709	3.63935	5.59649	-1.71367	2.71509e-06	6.66768e-05	1987	ENSG00000134775	33877677	34360018	+	inside	69415	69415	NearestLocation	FHOD3
chr1	150458540	150458940	401	*	4.49286	5.1529	3.24089	1.68793	2.88363e-06	7.04452e-05	275	ENSG00000143374	150459887	150480078	+	upstream	-1347	947	NearestLocation	TARS2
chr16	54536925	54537325	401	*	5.15543	4.07853	5.76515	-1.52238	2.91689e-06	7.08866e-05	1699	ENSG00000264079	54583215	54583308	-	downstream	46383	45890	NearestLocation	NA
chr7	91313171	91313571	401	*	4.7726	3.29236	5.48768	-1.86027	3.08193e-06	7.45092e-05	4077	ENSG00000223665	91268162	91272827	-	upstream	-40344	40344	NearestLocation	NA
chr9	102582267	102582667	401	*	5.49677	4.63782	6.03148	-1.29779	3.21827e-06	7.74044e-05	4541	ENSG00000237461	102348068	102582171	-	upstream	-96	96	NearestLocation	LOC101928438
chr13	113785857	113786257	401	*	4.76273	3.29106	5.47593	-1.85052	3.48364e-06	8.33572e-05	1350	ENSG00000230371	113784730	113786368	+	inside	1127	111	NearestLocation	KARS1P2
chr11	91605448	91605848	401	*	5.65344	4.87515	6.15623	-1.20533	3.5382e-06	8.42309e-05	882	ENSG00000254961	91682897	91683200	-	downstream	77752	77049	NearestLocation	TUBB4BP4
chr3	31206879	31207279	401	*	5.59239	4.78494	6.10699	-1.23851	3.55902e-06	8.42964e-05	2822	ENSG00000265376	31203196	31203279	-	upstream	-3600	3600	NearestLocation	MIR466
chr5	3092782	3093182	401	*	5.821	5.11619	6.29243	-1.11527	3.63719e-06	8.57128e-05	3363	ENSG00000249808	3178209	3181346	+	upstream	-85427	85027	NearestLocation	LINC01377
chr6	140249043	140249443	401	*	4.91079	3.63731	5.57649	-1.69449	3.67072e-06	8.60683e-05	3891	ENSG00000225148	140177241	140198528	-	upstream	-50515	50515	NearestLocation	NA
chr5	85913467	85913867	401	*	5.38252	4.47455	5.93545	-1.35088	3.69683e-06	8.62471e-05	3480	ENSG00000127184	85913721	85916779	+	overlapStart	-254	146	NearestLocation	COX7C
chr17	57183976	57184376	401	*	4.51222	2.41832	5.3325	-2.20233	3.73438e-06	8.66897e-05	1888	ENSG00000108395	57059999	57184282	-	overlapStart	306	94	NearestLocation	TRIM37
chr17	58677128	58677528	401	*	4.95569	3.73834	5.60639	-1.64833	3.75368e-06	8.67063e-05	1893	ENSG00000170836	58677544	58741849	+	upstream	-416	16	NearestLocation	PPM1D
chr2	179581835	179582235	401	*	5.48911	4.63833	6.02069	-1.28994	3.77901e-06	8.68614e-05	2442	ENSG00000267784	179588184	179591773	+	upstream	-6349	5949	NearestLocation	NA
chr5	58423468	58423868	401	*	5.22232	4.22295	5.80707	-1.44516	3.8373e-06	8.77688e-05	3434	ENSG00000247345	58335588	58359330	+	downstream	87880	64138	NearestLocation	NA
chr6	105748828	105749228	401	*	5.76308	5.04024	6.24242	-1.14043	3.89548e-06	8.86649e-05	3817	ENSG00000219902	105750328	105750698	-	downstream	1870	1100	NearestLocation	RPL35P3
chr1	168737204	168737604	401	*	4.70063	3.1529	5.43003	-1.898	4.18188e-06	9.47216e-05	318	ENSG00000235736	168732603	168743728	-	inside	6524	4601	NearestLocation	NA
chr1	247267591	247267991	401	*	4.69892	3.1529	5.42797	-1.89613	4.3959e-06	9.90882e-05	472	ENSG00000188295	247263264	247267674	-	overlapStart	83	83	NearestLocation	ZNF669
chr3	64598788	64599188	401	*	5.5161	4.68822	6.0388	-1.26031	4.59136e-06	0.000102997	2882	ENSG00000241158	64547014	64573878	+	downstream	51774	24910	NearestLocation	ADAMTS9-AS1
chr4	47826789	47827189	401	*	4.9908	3.83187	5.62507	-1.59491	4.62518e-06	0.000103038	3139	ENSG00000145244	47596015	47840123	-	inside	13334	12934	NearestLocation	CORIN
chr2	241198706	241199106	401	*	5.17095	4.1529	5.76187	-1.46156	4.63736e-06	0.000103038	2549	ENSG00000221412	241201132	241201277	-	downstream	2571	2026	NearestLocation	NA
chr12	111366493	111366893	401	*	6.62985	6.17127	6.97729	-0.788898	5.01752e-06	0.000110956	1163	ENSG00000185847	111374389	111396012	+	upstream	-7896	7496	NearestLocation	LINC01405
chr21	37407794	37408194	401	*	5.69778	4.96005	6.18354	-1.15527	5.21854e-06	0.000114857	2671	ENSG00000268098	37402368	37417818	+	inside	5426	5426	NearestLocation	NA
chr9	99238966	99239366	401	*	5.54205	4.73787	6.05535	-1.23143	5.69487e-06	0.000124752	4532	ENSG00000130956	99212483	99253618	+	inside	26483	14252	NearestLocation	HABP4
chr3	139477528	139477928	401	*	5.9514	5.32267	6.38784	-1.0201	5.83362e-06	0.000127195	2993	ENSG00000250543	139407245	139408184	-	upstream	-69344	69344	NearestLocation	NA
chr19	51003442	51003842	401	*	5.7481	5.04024	6.22087	-1.12097	5.99671e-06	0.000130143	2143	ENSG00000161677	51009255	51014610	-	downstream	11168	5413	NearestLocation	JOSD2
chr1	164827459	164827859	401	*	5.57026	4.78586	6.07555	-1.21029	6.13546e-06	0.000132537	305	ENSG00000201987	164823468	164823569	+	downstream	3991	3890	NearestLocation	NA
chr2	86332812	86333212	401	*	5.82708	5.15326	6.28457	-1.0755	6.46941e-06	0.000139107	2301	ENSG00000068654	86247339	86333278	-	inside	466	66	NearestLocation	POLR1A
chr8	121135768	121136168	401	*	5.27576	4.35485	5.83336	-1.35897	6.97555e-06	0.000149302	4368	ENSG00000187955	121072019	121384275	+	inside	63749	63749	NearestLocation	COL14A1
chr2	34542915	34543315	401	*	5.23578	4.28976	5.80229	-1.38684	7.06415e-06	0.000150508	2222	ENSG00000226785	34608855	34860407	+	upstream	-65940	65540	NearestLocation	NA
chrX	131622685	131623085	401	*	4.9247	3.73643	5.56733	-1.60926	7.16993e-06	0.000152068	4651	ENSG00000076770	131503345	131623996	-	inside	1311	911	NearestLocation	MBNL3
chr10	21186360	21186760	401	*	5.2742	4.35547	5.83102	-1.35824	7.23934e-06	0.000152845	508	ENSG00000230112	21130304	21130489	+	downstream	56056	55871	NearestLocation	NA
chr11	125260935	125261335	401	*	4.76609	3.41594	5.45113	-1.74265	7.49161e-06	0.000157459	937	ENSG00000255537	125365110	125369424	+	upstream	-104175	103775	NearestLocation	LOC403312
chr20	50109134	50109534	401	*	5.01261	3.91802	5.62778	-1.5266	7.55303e-06	0.000158038	2633	ENSG00000266761	50069442	50069514	-	upstream	-39620	39620	NearestLocation	MIR3194
chr17	46580951	46581351	401	*	6.34179	5.83053	6.71852	-0.860663	7.6096e-06	0.000158511	1873	ENSG00000206805	46556459	46556560	+	downstream	24492	24391	NearestLocation	NA
chr1	30601777	30602177	401	*	5.42693	4.58613	5.95466	-1.26969	7.7611e-06	0.000160948	79	ENSG00000233372	30613110	30614454	+	upstream	-11333	10933	NearestLocation	NA
chr20	60951371	60951771	401	*	5.00956	3.9197	5.62327	-1.52518	7.87976e-06	0.000162686	2653	ENSG00000130702	60883011	60942368	-	upstream	-9003	9003	NearestLocation	LAMA5
chr21	26282859	26283259	401	*	4.56166	2.83098	5.32608	-1.98716	8.02455e-06	0.000164945	2662	ENSG00000227090	26258990	26275070	-	upstream	-7789	7789	NearestLocation	NA
chr21	23595661	23596061	401	*	4.86486	3.64037	5.51751	-1.6426	8.22778e-06	0.000168039	2661	ENSG00000226043	23582258	23793139	+	inside	13403	13403	NearestLocation	NA
chr4	69215603	69216003	401	*	5.14169	4.15362	5.72265	-1.42637	8.24708e-06	0.000168039	3162	ENSG00000083896	69176105	69215807	-	overlapStart	204	196	NearestLocation	YTHDC1
chr6	43905064	43905464	401	*	4.6528	3.1529	5.37214	-1.84356	8.8235e-06	0.000179002	3734	ENSG00000181577	43968317	43973695	+	upstream	-63253	62853	NearestLocation	C6orf223
chr5	123569864	123570264	401	*	5.22798	4.29301	5.79061	-1.37142	8.89535e-06	0.000179678	3535	ENSG00000250862	123556272	123556770	-	upstream	-13094	13094	NearestLocation	NA
chr19	12958461	12958861	401	*	5.89085	5.25674	6.32985	-1.0221	9.24029e-06	0.000185841	2073	ENSG00000132026	12936292	12946242	-	upstream	-12219	12219	NearestLocation	RTBDN
chr10	122842493	122842893	401	*	4.74832	3.41594	5.429	-1.7222	9.84479e-06	0.000197149	708	ENSG00000236762	122892604	122893237	-	downstream	50744	49711	NearestLocation	NA
chr4	140374619	140375019	401	*	5.73441	5.04062	6.20093	-1.09578	1.01123e-05	0.000201641	3268	ENSG00000273247	140333081	140375188	-	inside	569	169	NearestLocation	NA
chr2	177486360	177486760	401	*	4.99546	3.92054	5.60456	-1.5067	1.04019e-05	0.000206533	2437	ENSG00000272551	177476165	177476977	-	upstream	-9383	9383	NearestLocation	NA
chr5	171433784	171434184	401	*	5.25587	4.35485	5.80627	-1.33404	1.05549e-05	0.000208682	3626	ENSG00000072803	171288553	171433877	-	overlapStart	93	93	NearestLocation	FBXW11
chr9	69234596	69234996	401	*	5.55098	4.78633	6.04811	-1.18198	1.06626e-05	0.000209922	4472	ENSG00000196400	69252845	69254032	+	upstream	-18249	17849	NearestLocation	NA
chr13	52775766	52776166	401	*	5.44465	4.63833	5.95881	-1.23078	1.09022e-05	0.000213531	1274	ENSG00000243406	52741844	52768600	-	upstream	-7166	7166	NearestLocation	MRPS31P5
chr20	1915111	1915511	401	*	5.33405	4.47455	5.86896	-1.28811	1.0949e-05	0.000213531	2559	ENSG00000233896	1927892	1988163	+	upstream	-12781	12381	NearestLocation	PDYN-AS1
chr9	131716466	131716866	401	*	4.3011	4.96005	3.05321	1.6491	1.09832e-05	0.000213531	4585	ENSG00000095319	131709978	131769375	+	inside	6488	6488	NearestLocation	NUP188
chr19	45943020	45943420	401	*	3.82271	0	4.82271	-2.33763	1.13094e-05	0.000218961	2125	ENSG00000125740	45971253	45978437	+	upstream	-28233	27833	NearestLocation	FOSB
chr15	55823219	55823619	401	*	4.79258	3.53086	5.45519	-1.6622	1.14211e-05	0.000220211	1549	ENSG00000256061	55702723	55800432	-	upstream	-22787	22787	NearestLocation	DNAAF4
chr16	70488384	70488784	401	*	4.99167	3.91633	5.6009	-1.50429	1.16745e-05	0.000224169	1728	ENSG00000157353	70488324	70514177	+	inside	60	60	NearestLocation	FCSK
chr4	97896680	97897080	401	*	4.90744	5.44729	4.03487	1.30346	1.201e-05	0.000229666	3209	ENSG00000236764	97823952	97824201	+	downstream	72728	72479	NearestLocation	NA
chr17	11900491	11900891	401	*	4.93947	3.83098	5.55886	-1.53479	1.23796e-05	0.000234992	1806	ENSG00000154957	11880756	11900827	-	overlapStart	336	64	NearestLocation	ZNF18
chr9	95715434	95715834	401	*	5.03245	4.0009	5.62778	-1.46053	1.23892e-05	0.000234992	4526	ENSG00000127084	95709733	95798518	+	inside	5701	5701	NearestLocation	FGD3
chr11	119762056	119762456	401	*	4.58421	2.99692	5.32164	-1.8863	1.25415e-05	0.000236918	924	ENSG00000254406	119692013	119692838	-	upstream	-69218	69218	NearestLocation	NA
chr21	30126541	30126941	401	*	4.83814	3.63935	5.48371	-1.61194	1.27868e-05	0.000240577	2664	ENSG00000251894	30115530	30115613	+	downstream	11011	10928	NearestLocation	NA
chr21	46831364	46831764	401	*	5.57371	4.83187	6.06123	-1.15516	1.28532e-05	0.000240855	2695	ENSG00000224574	46827301	46829980	-	upstream	-1384	1384	NearestLocation	COL18A1-AS2
chr11	114086569	114086969	401	*	6.41296	5.93981	6.76866	-0.807021	1.46683e-05	0.000273769	915	ENSG00000166741	114128509	114184007	+	upstream	-41940	41540	NearestLocation	NNMT
chr9	70884457	70884857	401	*	5.50487	4.73739	6.00318	-1.18048	1.49687e-05	0.000278263	4479	ENSG00000228537	70866135	70866572	-	upstream	-17885	17885	NearestLocation	NA
chr4	60061660	60062060	401	*	4.97421	3.91802	5.57743	-1.47873	1.5901e-05	0.00029442	3153	ENSG00000249111	60018552	60041864	+	downstream	43108	19796	NearestLocation	NA
chr1	74663805	74664205	401	*	5.3545	4.53252	5.87489	-1.24624	1.61451e-05	0.000297201	166	ENSG00000162620	74491699	74663871	-	overlapStart	66	66	NearestLocation	LRRIQ3
chr6	77261947	77262347	401	*	4.2458	1.83098	5.10376	-2.22635	1.61785e-05	0.000297201	3774	ENSG00000272445	77267370	77267471	-	downstream	5524	5023	NearestLocation	RNU6-84P
chr21	45118489	45118889	401	*	5.68511	5.0017	6.14697	-1.0847	1.63118e-05	0.000298475	2689	ENSG00000160209	45138975	45182188	+	upstream	-20486	20086	NearestLocation	LOC105372824;PDXK
chr9	45089456	45089856	401	*	5.01612	4.00011	5.60639	-1.44152	1.64504e-05	0.000299835	4468	ENSG00000231527	45108392	45112532	+	upstream	-18936	18536	NearestLocation	FAM27C;LOC105379444
chr2	42174832	42175232	401	*	5.0175	4.00011	5.60821	-1.44151	1.67933e-05	0.000304892	2240	ENSG00000205086	42162508	42181406	-	inside	6574	6174	NearestLocation	C2orf91
chr1	66739355	66739755	401	*	6.42518	5.96026	6.77623	-0.796059	1.70127e-05	0.00030768	155	ENSG00000223152	66560144	66560229	-	upstream	-179126	179126	NearestLocation	RNU4-88P
chr5	124532212	124532612	401	*	6.20554	5.68896	6.58514	-0.865039	1.72389e-05	0.000310567	3540	ENSG00000248631	124537581	124538223	+	upstream	-5369	4969	NearestLocation	NA
chr5	147262145	147262545	401	*	5.98597	5.41475	6.39409	-0.93901	1.84089e-05	0.00033037	3588	ENSG00000248362	147265649	147266441	-	downstream	4296	3104	NearestLocation	NA
chr5	128221500	128221900	401	*	6.00666	5.44466	6.41008	-0.92828	1.91469e-05	0.000342297	3550	ENSG00000066583	128430444	128449721	+	upstream	-208944	208544	NearestLocation	ISOC1
chr2	157190326	157190726	401	*	5.01026	4.0009	5.59833	-1.43193	1.94723e-05	0.000346785	2396	ENSG00000153234	157180944	157198860	-	inside	8534	8134	NearestLocation	NR4A2
chr22	33345804	33346204	401	*	5.01006	4.00011	5.59833	-1.43188	1.95722e-05	0.000347238	2738	ENSG00000228194	33410965	33411446	+	upstream	-65161	64761	NearestLocation	NA
chr1	15466239	15466639	401	*	4.9113	3.83008	5.52235	-1.4983	1.97325e-05	0.000348758	39	ENSG00000175147	15442448	15478960	-	inside	12721	12321	NearestLocation	TMEM51-AS1
chr13	106730421	106730821	401	*	4.46889	2.83098	5.21621	-1.90077	1.98729e-05	0.000349913	1329	ENSG00000222643	106780720	106780837	+	upstream	-50299	49899	NearestLocation	NA
chr4	149716310	149716710	401	*	5.18307	4.28911	5.73088	-1.31942	2.00445e-05	0.000351608	3287	ENSG00000225176	149624678	149624984	-	upstream	-91326	91326	NearestLocation	NA
chr22	47133741	47134141	401	*	5.22443	4.35609	5.76269	-1.29165	2.12755e-05	0.000371803	2779	ENSG00000100422	47080308	47134158	-	inside	417	17	NearestLocation	CERK
chr1	116861343	116861743	401	*	5.30098	4.47397	5.82334	-1.2469	2.18841e-05	0.000379989	231	ENSG00000221040	116821228	116821442	+	downstream	40115	39901	NearestLocation	NA
chr5	53752915	53753315	401	*	5.09111	4.1529	5.65487	-1.3634	2.19068e-05	0.000379989	3426	ENSG00000169271	53751445	53752207	+	downstream	1470	708	NearestLocation	HSPB3
chr11	3888993	3889393	401	*	5.70306	5.0414	6.15498	-1.05557	2.21301e-05	0.000382442	732	ENSG00000263421	3877292	3877371	+	downstream	11701	11622	NearestLocation	NA
chr12	91230448	91230848	401	*	5.17969	4.28976	5.72602	-1.31163	2.22561e-05	0.0003832	1124	ENSG00000257787	91203053	91204457	+	downstream	27395	25991	NearestLocation	NA
chr2	221541289	221541689	401	*	4.31302	2.41594	5.10506	-2.0243	2.24668e-05	0.000385405	2519	ENSG00000224819	221655798	221662613	+	upstream	-114509	114109	NearestLocation	NA
chr10	29546325	29546725	401	*	4.75172	3.53086	5.40337	-1.61614	2.26632e-05	0.000387349	525	ENSG00000120563	29577990	29607257	+	upstream	-31665	31265	NearestLocation	LYZL1
chr14	71847040	71847440	401	*	5.37459	4.58613	5.88154	-1.206	2.37363e-05	0.000404209	1433	ENSG00000207444	71865054	71865124	+	upstream	-18014	17614	NearestLocation	SNORD56B
chr4	25083791	25084191	401	*	4.7442	3.52976	5.39409	-1.60709	2.49133e-05	0.000421227	3113	ENSG00000153012	25000469	25032501	-	upstream	-51290	51290	NearestLocation	LGI2
chr7	157191015	157191415	401	*	5.64017	4.96005	6.10052	-1.07955	2.49161e-05	0.000421227	4175	ENSG00000105993	157128075	157210133	+	inside	62940	18718	NearestLocation	DNAJB6
chr3	129022868	129023268	401	*	4.57878	3.1529	5.28172	-1.76244	2.50499e-05	0.00042196	2978	ENSG00000206417	129034235	129045068	+	upstream	-11367	10967	NearestLocation	NA
chr2	43765283	43765683	401	*	5.08601	4.1529	5.64797	-1.35461	2.51688e-05	0.000422438	2241	ENSG00000115970	43393800	43823185	-	inside	57902	57502	NearestLocation	THADA
chr13	24084004	24084404	401	*	4.99198	4.0017	5.57369	-1.4123	2.53738e-05	0.000424353	1209	ENSG00000227893	24072935	24077013	+	downstream	11069	6991	NearestLocation	NA
chr1	16470270	16470670	401	*	5.48299	4.73882	5.97149	-1.1504	2.56355e-05	0.000427198	42	ENSG00000227959	16481706	16483824	+	upstream	-11436	11036	NearestLocation	NA
chr1	43672510	43672910	401	*	5.44262	4.68822	5.93545	-1.16316	2.61816e-05	0.000434746	112	ENSG00000199240	43662088	43662207	+	downstream	10422	10303	NearestLocation	RNA5SP46
chr5	1841158	1841558	401	*	6.13169	5.61221	6.51284	-0.86489	2.76499e-05	0.000457498	3362	ENSG00000249966	1851064	1851611	+	upstream	-9906	9506	NearestLocation	NA
chr20	55985082	55985482	401	*	4.50803	3.00011	5.22908	-1.81106	2.77784e-05	0.000458	2648	ENSG00000218018	55959216	55968118	-	upstream	-16964	16964	NearestLocation	RBM38-AS1
chr12	46654315	46654715	401	*	4.93803	3.91718	5.52988	-1.43851	2.82351e-05	0.000463891	1043	ENSG00000111371	46576846	46663800	-	inside	9485	9085	NearestLocation	SLC38A1
chr10	103646664	103647064	401	*	4.94031	3.92054	5.53181	-1.43856	2.85506e-05	0.000467428	668	ENSG00000120049	103585731	103603677	-	upstream	-42987	42987	NearestLocation	KCNIP2
chr6	112580399	112580799	401	*	6.08658	5.55903	6.47203	-0.877584	2.8738e-05	0.000468851	3831	ENSG00000112769	112429963	112576141	-	upstream	-4258	4258	NearestLocation	LAMA4
chr18	13271404	13271804	401	*	5.36428	4.58507	5.86744	-1.19089	2.93523e-05	0.000477153	1960	ENSG00000267177	13234944	13236469	-	upstream	-34935	34935	NearestLocation	NA
chr11	123275907	123276307	401	*	4.70568	3.41355	5.37621	-1.66394	2.94514e-05	0.000477153	933	ENSG00000265357	123252148	123252220	-	upstream	-23687	23687	NearestLocation	MIR4493
chr10	88424481	88424881	401	*	5.82657	5.22363	6.2505	-0.979186	2.97652e-05	0.000480416	629	ENSG00000122367	88428206	88495825	+	upstream	-3725	3325	NearestLocation	LDB3
chr13	60804842	60805242	401	*	4.83893	3.73739	5.45621	-1.50829	2.98587e-05	0.000480416	1284	ENSG00000227336	60788486	60789080	-	upstream	-15762	15762	NearestLocation	NA
chr5	92524549	92524949	401	*	6.98016	6.6252	7.26481	-0.626647	3.05119e-05	0.000489238	3492	ENSG00000213730	92603135	92604131	+	upstream	-78586	78186	NearestLocation	NA
chr5	151801623	151802023	401	*	5.16779	4.29041	5.70945	-1.29367	3.07326e-05	0.000489604	3598	ENSG00000132911	151771093	151812929	-	inside	11306	10906	NearestLocation	NMUR2
chr10	29543457	29543857	401	*	5.56965	4.87602	6.03609	-1.09321	3.08304e-05	0.000489604	524	ENSG00000120563	29577990	29607257	+	upstream	-34533	34133	NearestLocation	LYZL1
chr8	134552384	134552784	401	*	6.42945	5.98022	6.77151	-0.767517	3.08495e-05	0.000489604	4391	ENSG00000008513	134467091	134584183	-	inside	31799	31399	NearestLocation	ST3GAL1
chr14	59679122	59679522	401	*	3.50031	0	4.50031	-2.217	3.10373e-05	0.000490916	1409	ENSG00000100592	59655364	59838123	+	inside	23758	23758	NearestLocation	DAAM1
chr3	44887039	44887439	401	*	5.99484	5.44583	6.39155	-0.905419	3.14624e-05	0.000495958	2850	ENSG00000169964	44903361	44907162	+	upstream	-16322	15922	NearestLocation	TMEM42
chr18	6058911	6059311	401	*	4.18607	1.83455	5.03731	-2.15726	3.30517e-05	0.000519257	1945	ENSG00000266846	6025090	6082454	+	inside	33821	23143	NearestLocation	NA
chr13	113339543	113339943	401	*	3.47493	0	4.47493	-2.20694	3.36232e-05	0.000526462	1347	ENSG00000068650	113344643	113541482	+	upstream	-5100	4700	NearestLocation	ATP11A
chr3	78140573	78140973	401	*	5.43374	4.68871	5.92261	-1.14785	3.50006e-05	0.000546196	2918	ENSG00000240573	78136555	78141421	+	inside	4018	448	NearestLocation	NA
chr12	51803691	51804091	401	*	4.67038	3.41475	5.33139	-1.63093	3.56087e-05	0.000552819	1057	ENSG00000271065	51815740	51818395	-	downstream	14704	11649	NearestLocation	NA
chr6	112408559	112408959	401	*	4.62331	3.29106	5.30396	-1.68843	3.56835e-05	0.000552819	3830	ENSG00000203778	112408802	112423993	+	overlapStart	-243	157	NearestLocation	FAM229B
chr10	121101070	121101470	401	*	4.77545	3.63833	5.40337	-1.53787	3.57804e-05	0.000552819	704	ENSG00000236426	121094006	121095694	-	upstream	-5376	5376	NearestLocation	NA
chr1	155278376	155278776	401	*	5.32011	4.53307	5.82648	-1.19783	3.59964e-05	0.00055396	286	ENSG00000160752	155278539	155290457	+	overlapStart	-163	163	NearestLocation	FDPS
chr6	13487357	13487757	401	*	5.36285	4.58719	5.86454	-1.18287	3.60917e-05	0.00055396	3677	ENSG00000145990	13358062	13487894	-	inside	537	137	NearestLocation	GFOD1
chr20	12895380	12895780	401	*	4.18521	2.15433	4.99693	-2.05083	3.63196e-05	0.00055563	2572	ENSG00000269931	12915525	12916431	-	downstream	21051	19745	NearestLocation	NA
chr2	55196689	55197089	401	*	6.14358	5.63731	6.5176	-0.845601	3.65332e-05	0.000557071	2260	ENSG00000200086	55241554	55241657	-	downstream	44968	44465	NearestLocation	RNU6-433P
chr8	67055188	67055588	401	*	5.68326	5.04024	6.12648	-1.02842	3.71e-05	0.000562245	4287	ENSG00000147573	67039131	67087720	+	inside	16057	16057	NearestLocation	TRIM55
chr7	150945664	150946064	401	*	5.39535	4.63884	5.88907	-1.16106	3.71135e-05	0.000562245	4166	ENSG00000243018	150946411	150951476	+	upstream	-747	347	NearestLocation	NA
chr5	113785687	113786087	401	*	4.12364	1.83455	4.96794	-2.13064	3.72718e-05	0.000562816	3521	ENSG00000080709	113696642	113832337	+	inside	89045	46250	NearestLocation	KCNN2
chr14	23877539	23877939	401	*	4.71645	3.53086	5.35832	-1.57434	3.81e-05	0.000573467	1363	ENSG00000197616	23851199	23877486	-	upstream	-53	53	NearestLocation	MYH6
chr14	23877539	23877939	401	*	4.71645	3.53086	5.35832	-1.57434	3.81e-05	0.000573467	1363	LRG_389	23851199	23877486	-	upstream	-53	53	NearestLocation	NA
chr13	50018403	50018803	401	*	4.60708	3.28976	5.284	-1.67324	3.83384e-05	0.000575199	1267	ENSG00000136169	50018429	50069138	+	overlapStart	-26	26	NearestLocation	SETDB2
chr7	103210000	103210400	401	*	4.41077	2.83276	5.14634	-1.84066	3.85139e-05	0.00057598	4088	ENSG00000222386	103124655	103124986	-	upstream	-85014	85014	NearestLocation	NA
chr1	62744807	62745207	401	*	4.71584	3.53197	5.35724	-1.57359	3.88456e-05	0.00057842	144	ENSG00000201153	62763821	62763928	-	downstream	19121	18614	NearestLocation	RNU6-371P
chr7	28997071	28997471	401	*	4.96875	4.00011	5.54311	-1.38305	3.89249e-05	0.00057842	3992	ENSG00000228421	28997283	28998961	+	overlapStart	-212	188	NearestLocation	NA
chr1	29483418	29483818	401	*	5.23386	4.41713	5.75217	-1.23016	3.94898e-05	0.000584951	78	ENSG00000227637	29479001	29479503	+	downstream	4417	3915	NearestLocation	NA
chr4	103596250	103596650	401	*	4.97953	3.99851	5.55811	-1.39127	3.97536e-05	0.000586994	3219	ENSG00000241981	103583768	103584230	+	downstream	12482	12020	NearestLocation	RPL21P49
chr2	84343225	84343625	401	*	4.97078	4.00249	5.54502	-1.38267	4.05378e-05	0.000595661	2300	ENSG00000228902	84267009	84267844	-	upstream	-75381	75381	NearestLocation	ST6GALNAC2P1
chr18	28805598	28805998	401	*	4.86876	3.83098	5.4661	-1.44695	4.05959e-05	0.000595661	1976	ENSG00000134765	28709199	28742819	-	upstream	-62779	62779	NearestLocation	DSC1
chr2	21266566	21266966	401	*	4.78177	3.63833	5.41155	-1.54112	4.12904e-05	0.000603953	2194	ENSG00000084674	21224301	21266945	-	overlapStart	379	21	NearestLocation	APOB
chr6	27155246	27155646	401	*	5.01378	4.07853	5.57649	-1.34909	4.16832e-05	0.000605069	3705	ENSG00000174572	27179023	27179692	+	upstream	-23777	23377	NearestLocation	RPL10P2
chr5	179125659	179126059	401	*	5.76443	5.1529	6.19257	-0.986087	4.16936e-05	0.000605069	3654	ENSG00000204659	179105584	179107975	-	upstream	-17684	17684	NearestLocation	CBY3
chr8	90769736	90770136	401	*	4.97179	4.0009	5.54692	-1.3826	4.17558e-05	0.000605069	4314	ENSG00000104312	90769975	90803291	+	overlapStart	-239	161	NearestLocation	RIPK2
chr7	8301665	8302065	401	*	4.60865	3.28846	5.28628	-1.67111	4.19911e-05	0.000606596	3969	ENSG00000229970	8301894	8384146	+	overlapStart	-229	171	NearestLocation	NA
chr16	87763138	87763538	401	*	4.31904	2.63935	5.07423	-1.89024	4.24054e-05	0.000610691	1761	ENSG00000260671	87773369	87781312	-	downstream	18174	9831	NearestLocation	NA
chr8	117700279	117700679	401	*	5.52594	4.82963	5.99358	-1.08958	4.26667e-05	0.000611551	4359	ENSG00000147679	117778742	117861702	+	upstream	-78463	78063	NearestLocation	UTP23
chr6	126439186	126439586	401	*	6.15781	5.66374	6.52516	-0.831979	4.27273e-05	0.000611551	3860	ENSG00000231842	126498339	126523385	+	upstream	-59153	58753	NearestLocation	NA
chr16	46791397	46791797	401	*	6.09469	5.58507	6.47052	-0.85211	4.29061e-05	0.000612232	1684	ENSG00000260782	46823810	46825952	+	upstream	-32413	32013	NearestLocation	NA
chr2	66708351	66708751	401	*	4.72067	3.53086	5.36373	-1.57249	4.32696e-05	0.000615536	2275	ENSG00000244522	66666575	66668968	-	upstream	-39383	39383	NearestLocation	NA
chr2	62156129	62156529	401	*	5.34558	4.58507	5.84099	-1.16637	4.39259e-05	0.00062284	2268	ENSG00000115484	62095224	62115939	-	upstream	-40190	40190	NearestLocation	CCT4
chr1	101223489	101223889	401	*	5.62009	4.96046	6.07105	-1.0458	4.405e-05	0.00062284	216	ENSG00000162692	101185298	101204601	+	downstream	38191	18888	NearestLocation	VCAM1
chr17	80225030	80225430	401	*	4.59719	3.28976	5.27162	-1.6615	4.4496e-05	0.00062515	1932	ENSG00000141551	80196899	80231607	-	inside	6577	6177	NearestLocation	CSNK1D
chr19	33487202	33487602	401	*	4.24427	2.41594	5.02534	-1.95774	4.47286e-05	0.00062515	2099	ENSG00000131944	33463115	33469128	+	downstream	24087	18074	NearestLocation	FAAP24
chr17	56084883	56085283	401	*	6.58044	6.17109	6.89894	-0.708993	4.48002e-05	0.00062515	1882	ENSG00000136450	56080721	56084707	-	upstream	-176	176	NearestLocation	SRSF1
chr16	87465123	87465523	401	*	4.95984	4.0009	5.53085	-1.37281	4.48833e-05	0.00062515	1760	ENSG00000261592	87430310	87433901	-	upstream	-31222	31222	NearestLocation	NA
chr5	124045169	124045569	401	*	4.95984	4.0009	5.53085	-1.37281	4.48833e-05	0.00062515	3538	ENSG00000249112	124043520	124046430	+	inside	1649	861	NearestLocation	NA
chr17	66729870	66730270	401	*	5.97982	5.44642	6.36837	-0.887878	4.58603e-05	0.000635237	1911	ENSG00000263690	66762614	66762700	-	downstream	32830	32344	NearestLocation	MIR548D2
chr12	39789583	39789983	401	*	5.86232	5.29106	6.27046	-0.935954	4.58797e-05	0.000635237	1030	ENSG00000252974	39836850	39836918	-	downstream	47335	46867	NearestLocation	NA
chr5	146811922	146812322	401	*	4.81092	3.73643	5.41988	-1.47597	4.64364e-05	0.000641043	3586	ENSG00000272239	146781323	146781559	+	downstream	30599	30363	NearestLocation	NA
chr16	48980899	48981299	401	*	5.38092	4.63782	5.86896	-1.14489	4.68222e-05	0.000644462	1686	ENSG00000260184	48883830	48883926	-	upstream	-96973	96973	NearestLocation	NA
chr14	23907217	23907617	401	*	4.91391	3.92138	5.49638	-1.40601	4.82805e-05	0.000662578	1364	ENSG00000092054	23881947	23904927	-	upstream	-2290	2290	NearestLocation	MYH7
chr2	227423149	227423549	401	*	5.00306	4.07928	5.56169	-1.33847	4.84643e-05	0.000663151	2531	ENSG00000263363	227523426	227523509	-	downstream	100360	99877	NearestLocation	MIR5702
chr16	58066620	58067020	401	*	5.61478	4.96087	6.06309	-1.04402	4.91581e-05	0.000670677	1708	ENSG00000102996	58059470	58080805	+	inside	7150	7150	NearestLocation	MMP15
chr3	56943401	56943801	401	*	5.13684	4.28976	5.667	-1.25747	5.07204e-05	0.000689975	2872	ENSG00000240198	56974068	56994882	+	upstream	-30667	30267	NearestLocation	ARHGEF3-AS1
chr11	5706039	5706439	401	*	4.38831	2.83455	5.11895	-1.81398	5.27865e-05	0.000715993	733	ENSG00000132274	5710919	5758319	+	upstream	-4880	4480	NearestLocation	TRIM22
chr1	1677613	1678013	401	*	5.13367	4.28976	5.66262	-1.25628	5.30416e-05	0.000717369	7	ENSG00000215790	1656277	1677431	-	upstream	-182	182	NearestLocation	SLC35E2A
chr12	119660003	119660403	401	*	5.05002	4.15219	5.59925	-1.30704	5.33405e-05	0.000719172	1180	ENSG00000213144	119632655	119633199	+	downstream	27348	26804	NearestLocation	NA
chr14	37050343	37050743	401	*	4.0431	1.41832	4.92114	-2.1709	5.35219e-05	0.000719172	1382	ENSG00000136327	37049784	37051812	-	inside	1469	559	NearestLocation	NKX2-8
chr1	94746958	94747358	401	*	5.37568	4.63782	5.86148	-1.13689	5.36373e-05	0.000719172	206	ENSG00000137962	94614544	94740624	-	upstream	-6334	6334	NearestLocation	ARHGAP29
chr1	12098753	12099153	401	*	4.37939	2.83098	5.10893	-1.807	5.44298e-05	0.000725421	36	ENSG00000243539	12096799	12097071	-	upstream	-1682	1682	NearestLocation	RN7SL649P
chr6	140030008	140030408	401	*	5.6693	5.04062	6.1057	-1.00778	5.45395e-05	0.000725421	3889	ENSG00000205695	139981065	139982650	+	downstream	48943	47358	NearestLocation	LOC100129554
chr14	91976620	91977020	401	*	5.17637	4.35423	5.69681	-1.23015	5.45698e-05	0.000725421	1460	ENSG00000100796	91923955	91976898	-	overlapStart	278	122	NearestLocation	PPP4R3A
chr18	38017548	38017948	401	*	4.29929	2.63935	5.0508	-1.86359	5.79189e-05	0.000767755	1993	ENSG00000238333	38052785	38052846	+	upstream	-35237	34837	NearestLocation	NA
chr2	4823929	4824329	401	*	4.02846	1.41832	4.90519	-2.15997	5.84748e-05	0.000770786	2167	ENSG00000252238	4874591	4874674	-	downstream	50745	50262	NearestLocation	NA
chr8	49555950	49556350	401	*	5.04004	4.15219	5.5856	-1.29753	5.8478e-05	0.000770786	4267	ENSG00000253892	49569820	49571454	-	downstream	15504	13470	NearestLocation	NA
chrX	108780531	108780931	401	*	4.21261	2.41355	4.98883	-1.92553	6.00488e-05	0.000789261	4646	ENSG00000101888	108779010	108787919	+	inside	1521	1521	NearestLocation	NXT2
chr17	69605107	69605507	401	*	3.3107	0	4.3107	-2.1292	6.11023e-05	0.000800479	1913	ENSG00000228118	69617119	69617577	+	upstream	-12012	11612	NearestLocation	NA
chr5	137911210	137911610	401	*	5.29156	4.53197	5.78658	-1.16373	6.12454e-05	0.000800479	3569	ENSG00000113013	137890571	137911133	-	upstream	-77	77	NearestLocation	HSPA9
chr15	67546866	67547266	401	*	4.94215	4.0009	5.50698	-1.35168	6.181e-05	0.000804684	1580	ENSG00000103599	67547138	67794598	+	overlapStart	-272	128	NearestLocation	IQCH
chr9	99978712	99979112	401	*	4.30719	4.91802	3.2267	1.47441	6.19121e-05	0.000804684	4536	ENSG00000159712	99918852	99983517	-	inside	4805	4405	NearestLocation	NA
chr12	106468461	106468861	401	*	4.19266	2.41594	4.96509	-1.91626	6.20988e-05	0.00080487	1152	ENSG00000257890	106444739	106452032	-	upstream	-16429	16429	NearestLocation	NA
chr3	69905057	69905457	401	*	4.51301	3.15147	5.20081	-1.68857	6.22933e-05	0.000805154	2898	ENSG00000265722	69969276	69969361	+	upstream	-64219	63819	NearestLocation	NA
chr15	73681920	73682320	401	*	5.08049	4.22363	5.6144	-1.26699	6.28635e-05	0.000808346	1596	ENSG00000138622	73612200	73661605	-	upstream	-20315	20315	NearestLocation	HCN4
chr11	113743843	113744243	401	*	6.16703	5.68871	6.52564	-0.808168	6.28867e-05	0.000808346	913	ENSG00000048028	113668596	113746292	-	inside	2449	2049	NearestLocation	USP28
chr7	50693016	50693416	401	*	4.24074	2.41594	5.02124	-1.93606	6.40783e-05	0.000821399	4033	ENSG00000132437	50526134	50633154	-	upstream	-59862	59862	NearestLocation	DDC
chr6	105674440	105674840	401	*	5.36518	4.63833	5.84625	-1.12702	6.65988e-05	0.00085137	3815	ENSG00000252918	105644728	105644811	-	upstream	-29629	29629	NearestLocation	NA
chr10	29520754	29521154	401	*	5.1233	4.29041	5.64797	-1.23902	6.70073e-05	0.00085206	523	ENSG00000120563	29577990	29607257	+	upstream	-57236	56836	NearestLocation	LYZL1
chr2	25355098	25355498	401	*	4.19179	2.41832	4.96367	-1.91163	6.7018e-05	0.00085206	2198	ENSG00000261452	25380063	25382006	+	upstream	-24965	24565	NearestLocation	NA
chr12	59278553	59278953	401	*	3.28628	0	4.28628	-2.11542	6.76077e-05	0.000857222	1076	ENSG00000139263	59265931	59314303	-	inside	35750	12622	NearestLocation	LRIG3
chr8	93031335	93031735	401	*	5.2837	4.53197	5.77542	-1.15435	7.36157e-05	0.000929465	4318	ENSG00000253576	92988136	92989646	+	downstream	43199	41689	NearestLocation	NA
chr6	96969566	96969966	401	*	4.98252	4.07928	5.53373	-1.30943	7.37039e-05	0.000929465	3807	ENSG00000233797	96806250	96969545	-	upstream	-21	21	NearestLocation	NA
chr15	101689470	101689870	401	*	4.16738	2.41594	4.93545	-1.89416	7.45329e-05	0.000935538	1641	ENSG00000259182	101708735	101711026	+	upstream	-19265	18865	NearestLocation	NA
chr3	195613450	195613850	401	*	4.9793	4.07777	5.52988	-1.30866	7.45864e-05	0.000935538	3084	ENSG00000224614	195634947	195638128	+	upstream	-21497	21097	NearestLocation	NA
chr17	63700823	63701223	401	*	4.57294	3.28715	5.24183	-1.62927	7.55114e-05	0.000942981	1907	ENSG00000270870	63651032	63651513	+	downstream	49791	49310	NearestLocation	NA
chr9	112508333	112508733	401	*	4.62114	3.41713	5.26816	-1.57213	7.5584e-05	0.000942981	4551	ENSG00000232939	112522640	112534323	-	downstream	25990	13907	NearestLocation	LOC107987013
chr15	67127370	67127770	401	*	4.62513	3.41475	5.27392	-1.57353	7.59642e-05	0.000945197	1577	ENSG00000270490	67100742	67102898	+	downstream	26628	24472	NearestLocation	LETM1P1
chr9	67702273	67702673	401	*	5.62713	5.0005	6.06256	-1.00161	7.68652e-05	0.000953865	4471	ENSG00000199432	67764522	67764633	+	upstream	-62249	61849	NearestLocation	NA
chr22	28028972	28029372	401	*	5.11639	4.29041	5.63835	-1.22966	7.72543e-05	0.00095615	2729	ENSG00000224027	27959800	27969534	-	upstream	-59438	59438	NearestLocation	NA
chr2	47403505	47403905	401	*	6.22019	5.7623	6.56723	-0.780581	7.79934e-05	0.000962744	2248	ENSG00000273269	47293080	47403650	-	overlapStart	145	145	NearestLocation	NA
chr6	100790752	100791152	401	*	5.19761	4.41594	5.70178	-1.18527	7.97574e-05	0.000981921	3812	ENSG00000228082	100874994	100885360	+	upstream	-84242	83842	NearestLocation	NA
chr1	116958427	116958827	401	*	4.62655	3.41713	5.27507	-1.57194	8.08361e-05	0.000992582	234	ENSG00000212385	116956388	116956491	-	upstream	-1936	1936	NearestLocation	RNU6-817P
chr12	88913654	88914054	401	*	4.2162	2.41355	4.99302	-1.90865	8.15856e-05	0.000997744	1115	ENSG00000049130	88886570	88974628	-	inside	60974	27084	NearestLocation	KITLG
chr2	220573939	220574339	401	*	4.07287	2.15433	4.8682	-1.95656	8.17811e-05	0.000997744	2518	ENSG00000223903	220562521	220562936	+	downstream	11418	11003	NearestLocation	RPL23P4
chr15	74219892	74220292	401	*	4.41609	3.0017	5.11639	-1.71327	8.1898e-05	0.000997744	1597	ENSG00000261801	74200424	74220589	-	inside	697	297	NearestLocation	LOXL1-AS1
chr12	43505446	43505846	401	*	4.24261	2.63935	4.98321	-1.81853	8.25462e-05	0.00100302	1037	ENSG00000258331	43549118	43556913	+	upstream	-43672	43272	NearestLocation	LINC02461
chr4	75895234	75895634	401	*	6.11681	5.63756	6.47593	-0.807915	8.31562e-05	0.00100781	3172	ENSG00000249717	75881184	75895572	-	overlapStart	338	62	NearestLocation	PARM1-AS1
chr4	89219178	89219578	401	*	4.1552	2.41594	4.92114	-1.88125	8.43151e-05	0.00101921	3198	ENSG00000246375	89206094	89252573	+	inside	13084	13084	NearestLocation	PPM1K-DT
chr3	39232000	39232400	401	*	4.32772	2.82919	5.04677	-1.75922	8.48868e-05	0.00102347	2843	ENSG00000168334	39224701	39234087	-	inside	2087	1687	NearestLocation	XIRP1
chr21	35899194	35899594	401	*	4.07645	2.15147	4.87276	-1.95397	8.58523e-05	0.00103244	2669	ENSG00000180509	35818988	35884573	-	upstream	-14621	14621	NearestLocation	KCNE1
chr15	57179478	57179878	401	*	5.46312	4.78494	5.92261	-1.06197	8.77172e-05	0.00105139	1550	ENSG00000137871	56922379	57210769	-	inside	31291	30891	NearestLocation	ZNF280D
chr10	28848416	28848816	401	*	4.48536	3.1529	5.16605	-1.65586	8.78789e-05	0.00105139	518	ENSG00000254635	28811581	28821672	-	upstream	-26744	26744	NearestLocation	NA
chr11	130350061	130350461	401	*	3.94818	1.41355	4.81799	-2.10713	8.81563e-05	0.00105201	948	ENSG00000166106	130318869	130346532	+	downstream	31192	3529	NearestLocation	ADAMTS15
chr9	6078694	6079094	401	*	4.83783	3.83098	5.42507	-1.40162	8.88504e-05	0.00105746	4420	ENSG00000228739	6047360	6066714	+	downstream	31334	11980	NearestLocation	NA
chr10	21366671	21367071	401	*	4.87438	3.91886	5.4442	-1.35655	8.92494e-05	0.00105746	509	ENSG00000228219	21399611	21402317	+	upstream	-32940	32540	NearestLocation	NPM1P30
chr2	11698319	11698719	401	*	5.27329	4.53086	5.76105	-1.13848	8.92924e-05	0.00105746	2179	ENSG00000251718	11701320	11701432	+	upstream	-3001	2601	NearestLocation	RNU2-13P
chr3	105213936	105214336	401	*	4.32994	2.82919	5.04946	-1.75735	8.96932e-05	0.00105952	2939	ENSG00000170017	105085753	105295744	+	inside	128183	81408	NearestLocation	ALCAM
chr3	137905859	137906259	401	*	5.35196	4.63833	5.82726	-1.10403	9.10461e-05	0.00107278	2988	ENSG00000114098	137906109	138017231	+	overlapStart	-250	150	NearestLocation	ARMC8
chr6	85328136	85328536	401	*	5.23392	4.47569	5.72837	-1.15979	9.18941e-05	0.00108005	3789	ENSG00000231776	85130746	85265870	-	upstream	-62266	62266	NearestLocation	LINC01611
chr7	50689841	50690241	401	*	5.45742	4.78448	5.91451	-1.06044	9.25366e-05	0.00108197	4032	ENSG00000132437	50526134	50633154	-	upstream	-56687	56687	NearestLocation	DDC
chr9	34637384	34637784	401	*	4.23105	2.63935	4.96936	-1.80632	9.26721e-05	0.00108197	4451	ENSG00000147955	34634719	34637806	-	inside	422	22	NearestLocation	SIGMAR1
chr5	41457137	41457537	401	*	4.28828	2.64139	5.03731	-1.83628	9.27534e-05	0.00108197	3408	ENSG00000182836	41307056	41510730	-	inside	53593	53193	NearestLocation	PLCXD3
chr8	132044577	132044977	401	*	5.64776	5.04101	6.07357	-0.979186	9.32201e-05	0.0010847	4389	ENSG00000155897	131792547	132054672	-	inside	10095	9695	NearestLocation	ADCY8
chr7	132101684	132102084	401	*	4.3138	2.83098	5.02944	-1.74697	9.42239e-05	0.00109365	4134	ENSG00000223436	132037093	132052735	+	downstream	64591	48949	NearestLocation	NA
chr7	70133396	70133796	401	*	4.92114	4.00249	5.47793	-1.32146	9.49785e-05	0.00109968	4048	ENSG00000236978	70302724	70302999	+	upstream	-169328	168928	NearestLocation	LOC100967223
chr9	46210520	46210920	401	*	5.38501	4.6892	5.85243	-1.08376	9.69172e-05	0.00111935	4470	ENSG00000227490	46169973	46170336	+	downstream	40547	40184	NearestLocation	NA
chr20	18118331	18118731	401	*	4.96633	4.07853	5.51186	-1.28919	9.79553e-05	0.00112854	2586	ENSG00000232838	18118517	18123813	+	overlapStart	-186	186	NearestLocation	PET117
chr12	70004645	70005045	401	*	4.65943	3.52976	5.28514	-1.50366	0.000100256	0.00115221	1090	ENSG00000198812	70002351	70004942	-	overlapStart	297	103	NearestLocation	LRRC10
chr3	67469459	67469859	401	*	5.55444	4.91886	5.99414	-1.01628	0.000100865	0.00115635	2889	ENSG00000242510	67564364	67564744	+	upstream	-94905	94505	NearestLocation	NDUFB4P1
chr4	72723507	72723907	401	*	6.30819	5.87494	6.64094	-0.742176	0.000101203	0.00115738	3166	ENSG00000248567	72687022	72689697	-	upstream	-33810	33810	NearestLocation	NA
chr3	177061612	177062012	401	*	4.045	2.15147	4.83648	-1.93059	0.000102828	0.00117309	3042	ENSG00000226782	177055416	177066954	-	inside	5342	4942	NearestLocation	NA
chr15	57675176	57675576	401	*	3.96706	1.83098	4.79285	-2.00877	0.000103403	0.00117678	1551	ENSG00000128849	57668165	57842925	+	inside	7011	7011	NearestLocation	CGNL1
chr16	68271419	68271819	401	*	5.64302	5.03985	6.06708	-0.97228	0.000104521	0.00118661	1725	ENSG00000261469	68270748	68271570	-	overlapStart	151	151	NearestLocation	NA
chr10	112461403	112461803	401	*	5.01198	4.1529	5.54673	-1.26411	0.000106444	0.0012055	690	ENSG00000252036	112516214	112516481	+	upstream	-54811	54411	NearestLocation	RN7SKP288
chr2	69116589	69116989	401	*	4.91181	4.00011	5.4661	-1.31138	0.000107016	0.00120905	2280	ENSG00000163217	69092613	69098649	-	upstream	-17940	17940	NearestLocation	BMP10
chr2	69116589	69116989	401	*	4.91181	4.00011	5.4661	-1.31138	0.000107016	0.00120905	2280	LRG_403	69092613	69098649	-	upstream	-17940	17940	NearestLocation	NA
chr2	218719547	218719947	401	*	4.12379	2.41355	4.88456	-1.85398	0.000107826	0.00121106	2509	ENSG00000256309	218664514	218665979	-	upstream	-53568	53568	NearestLocation	NA
chr8	127557571	127557971	401	*	4.38376	3.00011	5.07686	-1.68129	0.000107912	0.00121106	4382	ENSG00000254010	127569141	127569678	+	upstream	-11570	11170	NearestLocation	NA
chr12	90102823	90103223	401	*	4.38407	3.0017	5.07686	-1.68116	0.000108089	0.00121106	1118	ENSG00000070961	89981828	90103077	-	overlapStart	254	146	NearestLocation	ATP2B1
chr12	110547327	110547727	401	*	5.13979	4.35485	5.6453	-1.18387	0.000108233	0.00121106	1159	ENSG00000122970	110562140	110656602	+	upstream	-14813	14413	NearestLocation	IFT81
chr1	168329915	168330315	401	*	4.59247	3.41713	5.23145	-1.53811	0.000111652	0.00124634	313	ENSG00000227722	168338292	168338839	+	upstream	-8377	7977	NearestLocation	NA
chr18	25691989	25692389	401	*	4.70462	3.63935	5.3107	-1.4495	0.000113237	0.00126101	1974	ENSG00000170558	25530930	25757410	-	inside	65421	65021	NearestLocation	CDH2
chr20	54967410	54967810	401	*	5.05411	4.22227	5.57836	-1.22866	0.00011476	0.00127492	2646	ENSG00000101138	54967427	54979518	+	overlapStart	-17	17	NearestLocation	CSTF1
chr9	93955923	93956323	401	*	4.80527	3.83098	5.38156	-1.37039	0.000115904	0.00128171	4522	ENSG00000273381	93968457	93972581	-	downstream	16658	12134	NearestLocation	NA
chr7	11902971	11903371	401	*	4.70547	3.63935	5.31182	-1.4492	0.00011592	0.00128171	3973	ENSG00000005108	11409984	11871824	-	upstream	-31147	31147	NearestLocation	THSD7A
chr14	75743772	75744172	401	*	3.90072	1.41355	4.76597	-2.07138	0.000116661	0.00128685	1443	ENSG00000170345	75745477	75748933	+	upstream	-1705	1305	NearestLocation	FOS
chr5	107175740	107176140	401	*	6.10666	5.63833	6.45965	-0.791452	0.000117698	0.00129523	3507	ENSG00000251732	107146330	107146625	+	downstream	29410	29115	NearestLocation	RN7SKP122
chr11	79367424	79367824	401	*	3.93746	1.83098	4.75941	-1.9892	0.00011851	0.0013011	860	ENSG00000221551	79403423	79403573	+	upstream	-35999	35599	NearestLocation	NA
chr4	47765188	47765588	401	*	3.97981	1.83098	4.80723	-1.99893	0.000118804	0.00130127	3137	ENSG00000251827	47813481	47813652	-	downstream	48464	47893	NearestLocation	NA
chr13	76881345	76881745	401	*	4.44875	3.1529	5.12023	-1.62044	0.00012209	0.00133412	1296	ENSG00000243274	76709067	76709360	+	downstream	172278	171985	NearestLocation	RN7SL571P
chr8	133976030	133976430	401	*	4.37221	3.00011	5.06256	-1.6687	0.000122809	0.00133541	4390	ENSG00000240237	134014850	134015320	-	downstream	39290	38420	NearestLocation	RPL21P78
chr8	104360478	104360878	401	*	4.28862	2.83276	4.99832	-1.72045	0.000122956	0.00133541	4348	ENSG00000164932	104383743	104395225	+	upstream	-23265	22865	NearestLocation	CTHRC1
chr1	20208736	20209136	401	*	4.44977	3.1529	5.12151	-1.62044	0.000123131	0.00133541	49	ENSG00000169914	20209006	20239438	+	overlapStart	-270	130	NearestLocation	OTUD3
chr1	232756063	232756463	401	*	4.65153	3.53307	5.27392	-1.49045	0.000123353	0.00133541	440	ENSG00000116991	232533711	232697304	-	upstream	-58759	58759	NearestLocation	SIPA1L2
chr2	227584957	227585357	401	*	4.11417	2.41594	4.87276	-1.83992	0.00012456	0.00134281	2532	ENSG00000263363	227523426	227523509	-	upstream	-61448	61448	NearestLocation	MIR5702
chr6	17973427	17973827	401	*	5.80326	5.25707	6.19851	-0.896192	0.000124612	0.00134281	3687	ENSG00000137177	17759414	17987854	-	inside	14427	14027	NearestLocation	KIF13A
chr1	74886289	74886689	401	*	4.01146	2.15147	4.79766	-1.90538	0.000125423	0.00134844	168	ENSG00000237324	74807263	74844486	-	upstream	-41803	41803	NearestLocation	NA
chr11	106776260	106776660	401	*	4.80969	3.83276	5.38688	-1.36968	0.000126411	0.00135294	901	ENSG00000213252	106697118	106698616	-	upstream	-77644	77644	NearestLocation	LOC100422300
chr15	58624152	58624552	401	*	5.80531	5.2584	6.20093	-0.896274	0.000126669	0.00135294	1555	ENSG00000166035	58702768	58861151	+	upstream	-78616	78216	NearestLocation	LIPC
chr8	125029729	125030129	401	*	5.00436	4.15433	5.53565	-1.24757	0.000126711	0.00135294	4376	ENSG00000254249	125048251	125052709	-	downstream	22980	18122	NearestLocation	NA
chr3	168313984	168314384	401	*	5.37216	4.69019	5.83336	-1.06693	0.00012724	0.00135548	3030	ENSG00000207717	168269642	168269737	+	downstream	44342	44247	NearestLocation	MIR551B
chr14	88959772	88960172	401	*	6.16841	5.71422	6.51333	-0.768814	0.000129166	0.00137286	1454	ENSG00000258983	88965678	88981433	+	upstream	-5906	5506	NearestLocation	NA
chr1	238835573	238835973	401	*	4.2771	2.83098	4.98462	-1.71001	0.000132961	0.00140948	456	ENSG00000224783	238940349	238942500	-	downstream	106927	104376	NearestLocation	NA
chr13	39165194	39165594	401	*	5.33144	4.63833	5.79766	-1.07854	0.000133507	0.00140948	1240	ENSG00000229437	39150777	39153131	+	downstream	14417	12063	NearestLocation	NA
chr2	50292927	50293327	401	*	4.27595	2.83098	4.98321	-1.70954	0.000133517	0.00140948	2254	ENSG00000212580	50116006	50116124	-	upstream	-176803	176803	NearestLocation	NA
chr15	34875676	34876076	401	*	5.40431	4.73787	5.85842	-1.0479	0.00013503	0.00141834	1505	ENSG00000175265	34671269	34880704	-	inside	5028	4628	NearestLocation	GOLGA8A
chr15	34875676	34876076	401	*	5.40431	4.73787	5.85842	-1.0479	0.00013503	0.00141834	1505	ENSG00000215252	34817408	34880704	-	inside	5028	4628	NearestLocation	GOLGA8B
chr10	47152622	47153022	401	*	5.33365	4.63833	5.80086	-1.07884	0.000135144	0.00141834	555	ENSG00000213412	47133338	47133898	-	upstream	-18724	18724	NearestLocation	HNRNPA1P33
chr4	100484997	100485397	401	*	5.92151	5.41594	6.29515	-0.843696	0.000135453	0.00141834	3212	ENSG00000145331	100467866	100485189	-	overlapStart	192	192	NearestLocation	TRMT10A
chr6	137337525	137337925	401	*	3.86253	1.41832	4.72349	-2.05022	0.000135861	0.00141834	3882	ENSG00000235399	137316307	137320641	+	downstream	21218	16884	NearestLocation	NA
chr9	32552427	32552827	401	*	5.08674	4.28911	5.59741	-1.1914	0.000135876	0.00141834	4446	ENSG00000197579	32540542	32552551	-	overlapStart	124	124	NearestLocation	TOPORS
chr7	19156646	19157046	401	*	4.00772	2.15433	4.79285	-1.89861	0.000137031	0.0014272	3980	ENSG00000122691	19060614	19157295	-	inside	649	249	NearestLocation	TWIST1
chr1	101172393	101172793	401	*	4.90668	4.00249	5.45823	-1.29956	0.00013772	0.00143119	215	ENSG00000162692	101185298	101204601	+	upstream	-12905	12505	NearestLocation	VCAM1
chr1	78547903	78548303	401	*	4.27513	2.83276	4.9818	-1.70687	0.000140494	0.00145676	172	ENSG00000251958	78554672	78554767	-	downstream	6864	6369	NearestLocation	RNU6-1102P
chr2	161187792	161188192	401	*	6.73927	6.38602	7.02282	-0.619583	0.000141567	0.00146463	2410	ENSG00000115221	160956177	161128399	-	upstream	-59393	59393	NearestLocation	ITGB6
chr9	9998566	9998966	401	*	4.19303	2.63731	4.92407	-1.76398	0.000143419	0.00148051	4429	ENSG00000230920	9799423	9803784	+	downstream	199143	194782	NearestLocation	LOC105375972
chr3	195163442	195163842	401	*	4.1765	2.63935	4.90371	-1.75456	0.000147848	0.00152287	3083	ENSG00000114331	194995465	195163807	-	overlapStart	365	35	NearestLocation	ACAP2
chr5	122181339	122181739	401	*	5.60334	5.0013	6.02685	-0.965392	0.000148835	0.00152965	3532	ENSG00000064652	122179134	122365049	+	inside	2205	2205	NearestLocation	SNX24
chr16	55731288	55731688	401	*	4.93968	4.07928	5.47493	-1.25757	0.000150039	0.00153807	1701	ENSG00000260765	55762027	55784023	+	upstream	-30739	30339	NearestLocation	NA
chr1	2066884	2067284	401	*	4.26465	2.83098	4.96936	-1.69706	0.000150462	0.00153807	8	ENSG00000271806	2072523	2076718	-	downstream	9834	5239	NearestLocation	NA
chr5	64242892	64243292	401	*	5.16512	4.41594	5.65575	-1.14038	0.000151115	0.00153807	3441	ENSG00000272370	64315865	64316378	+	upstream	-72973	72573	NearestLocation	NA
chrX	100075056	100075456	401	*	4.52654	3.29236	5.18182	-1.57022	0.000151154	0.00153807	4643	ENSG00000101811	100075384	100095921	+	overlapStart	-328	72	NearestLocation	CSTF2
chr13	42180714	42181114	401	*	4.62908	3.53086	5.24535	-1.46831	0.000151302	0.00153807	1250	ENSG00000264190	42142422	42142531	-	upstream	-38183	38183	NearestLocation	NA
chr8	30269607	30270007	401	*	5.39847	4.73739	5.85012	-1.03979	0.000153269	0.00155468	4239	ENSG00000254109	30239635	30242917	-	upstream	-26690	26690	NearestLocation	RBPMS-AS1
chr3	178864942	178865342	401	*	4.79039	3.83098	5.36157	-1.3486	0.000157194	0.00159104	3048	ENSG00000229102	178819154	178865761	-	inside	819	419	NearestLocation	LOC101928739
chr7	126076292	126076692	401	*	4.98681	4.1529	5.51186	-1.22788	0.000157724	0.00159294	4126	ENSG00000241921	126019024	126064239	+	downstream	57268	12053	NearestLocation	NA
chr3	171466156	171466556	401	*	4.42658	3.1529	5.09233	-1.59549	0.000158979	0.00159793	3033	ENSG00000238359	171411001	171411104	+	downstream	55155	55052	NearestLocation	NA
chr18	38011452	38011852	401	*	4.9838	4.15219	5.50796	-1.22715	0.000158986	0.00159793	1992	ENSG00000238333	38052785	38052846	+	upstream	-41333	40933	NearestLocation	NA
chr13	39960565	39960965	401	*	3.88814	1.83098	4.70348	-1.95129	0.000159245	0.00159793	1243	ENSG00000238408	40021252	40021353	-	downstream	60788	60287	NearestLocation	NA
chr1	43613324	43613724	401	*	5.07542	4.29041	5.58096	-1.18035	0.000160522	0.00160632	111	ENSG00000186973	43610824	43622067	+	inside	2500	2500	NearestLocation	FAM183A
chr6	130339488	130339888	401	*	5.28371	4.5856	5.75217	-1.08197	0.00016173	0.00160632	3866	ENSG00000198945	130334844	130462594	+	inside	4644	4644	NearestLocation	L3MBTL3
chr3	72193885	72194285	401	*	4.68447	3.63629	5.28514	-1.42455	0.000161996	0.00160632	2905	ENSG00000243083	72200408	72223483	+	upstream	-6523	6123	NearestLocation	LINC00870
chr10	25782072	25782472	401	*	5.43152	4.78494	5.8764	-1.02186	0.000162469	0.00160632	516	ENSG00000222543	25682486	25682773	-	upstream	-99299	99299	NearestLocation	RN7SKP220
chr12	49626820	49627220	401	*	5.11856	4.35485	5.61531	-1.1556	0.000162509	0.00160632	1050	ENSG00000258101	49627352	49658539	-	downstream	31719	132	NearestLocation	NA
chr5	134529871	134530271	401	*	3.82755	1.41832	4.68493	-2.02617	0.000162775	0.00160632	3564	ENSG00000249647	134571924	134583869	-	downstream	53998	41653	NearestLocation	C5orf66-AS2
chr15	31679748	31680148	401	*	4.17122	2.63731	4.89775	-1.74848	0.000162836	0.00160632	1501	ENSG00000259179	31712331	31712865	+	upstream	-32583	32183	NearestLocation	UBE2CP4
chr2	36709999	36710399	401	*	4.17122	2.63731	4.89775	-1.74848	0.000162836	0.00160632	2223	ENSG00000273090	36740398	36740875	-	downstream	30876	29999	NearestLocation	NA
chr4	144265943	144266343	401	*	5.11792	4.35485	5.6144	-1.15539	0.000163558	0.0016097	3279	ENSG00000265623	144264613	144264688	+	downstream	1330	1255	NearestLocation	MIR3139
chr15	74823758	74824158	401	*	3.88621	1.82739	4.70178	-1.94861	0.000164208	0.0016097	1600	ENSG00000179361	74833518	74890472	+	upstream	-9760	9360	NearestLocation	ARID3B
chr6	16277677	16278077	401	*	4.78993	3.82919	5.36157	-1.34778	0.000164212	0.0016097	3681	ENSG00000137198	16238811	16295780	+	inside	38866	17703	NearestLocation	GMPR
chr22	39715635	39716035	401	*	4.19389	2.63526	4.92554	-1.7568	0.000165616	0.00162005	2757	ENSG00000100316	39708887	39716394	-	inside	759	359	NearestLocation	RPL3
chr17	71470508	71470908	401	*	4.8881	4.0017	5.43312	-1.27927	0.000168342	0.00164327	1914	ENSG00000264985	71509824	71514909	+	upstream	-39316	38916	NearestLocation	LOC101928251
chr10	106471020	106471420	401	*	4.25093	2.83098	4.95251	-1.68411	0.00016879	0.0016442	679	ENSG00000226387	106424366	106425958	-	upstream	-45062	45062	NearestLocation	SORCS3-AS1
chr4	113668058	113668458	401	*	4.24977	2.83098	4.95107	-1.68359	0.000169622	0.00164887	3234	ENSG00000241002	113659828	113660262	+	downstream	8230	7796	NearestLocation	RPL32P13
chr7	137139585	137139985	401	*	3.82239	1.41355	4.67973	-2.01997	0.000172462	0.00167198	4145	ENSG00000228031	137029676	137039229	-	upstream	-100356	100356	NearestLocation	NA
chr12	6616750	6617150	401	*	4.50261	3.29236	5.15135	-1.5494	0.000172716	0.00167198	980	ENSG00000239002	6619388	6619717	+	upstream	-2638	2238	NearestLocation	SCARNA10
chr13	113383834	113384234	401	*	5.16046	4.41653	5.64885	-1.13127	0.00017557	0.0016937	1349	ENSG00000264726	113372159	113372228	-	upstream	-11606	11606	NearestLocation	NA
chr1	153643559	153643959	401	*	6.21573	5.78448	6.5473	-0.737557	0.000176048	0.0016937	280	ENSG00000143621	153634512	153643524	-	upstream	-35	35	NearestLocation	ILF2
chr14	100040739	100041139	401	*	6.13473	5.68871	6.47493	-0.759865	0.000176049	0.0016937	1474	ENSG00000200506	100049354	100049455	+	upstream	-8615	8215	NearestLocation	NA
chr12	1890932	1891332	401	*	4.33368	3.00011	5.01465	-1.63033	0.000176713	0.00169401	963	ENSG00000243663	1866397	1867177	-	upstream	-23755	23755	NearestLocation	RPS4XP14
chr13	44962498	44962898	401	*	4.44152	3.15147	5.11151	-1.60047	0.000176807	0.00169401	1258	ENSG00000151778	44947801	44971850	+	inside	14697	8952	NearestLocation	SERP2
chr2	62198302	62198702	401	*	5.15894	4.41773	5.64619	-1.13074	0.000177447	0.00169665	2269	ENSG00000115484	62095224	62115939	-	upstream	-82363	82363	NearestLocation	CCT4
chr12	48519728	48520128	401	*	3.81166	1.41355	4.66788	-2.01397	0.000178501	0.00170324	1047	ENSG00000079387	48436681	48500091	-	upstream	-19637	19637	NearestLocation	SENP1
chr10	30976532	30976932	401	*	3.86987	1.82739	4.6832	-1.93637	0.000179976	0.00171326	530	ENSG00000234814	30960495	31006195	+	inside	16037	16037	NearestLocation	NA
chr2	99124765	99125165	401	*	4.97851	4.1529	5.50031	-1.21761	0.000180623	0.00171326	2318	ENSG00000040933	99061317	99210853	+	inside	63448	63448	NearestLocation	INPP4A
chr1	26420733	26421133	401	*	4.97639	4.1529	5.49736	-1.21708	0.000181204	0.00171326	68	ENSG00000175087	26437664	26452034	+	upstream	-16931	16531	NearestLocation	PDIK1L
chr3	190314939	190315339	401	*	4.25294	2.82919	4.95538	-1.68143	0.000181352	0.00171326	3068	ENSG00000231047	190342384	190342958	+	upstream	-27445	27045	NearestLocation	GCNT1P3
chr6	116783144	116783544	401	*	4.9783	4.15219	5.50031	-1.21756	0.000181408	0.00171326	3842	ENSG00000188820	116782533	116784934	+	inside	611	611	NearestLocation	CALHM6
chr10	102687822	102688222	401	*	4.77868	3.83187	5.34547	-1.33644	0.000181753	0.00171326	664	ENSG00000272572	102670860	102672496	-	upstream	-15326	15326	NearestLocation	NA
chr13	34727660	34728060	401	*	5.49556	4.87602	5.92758	-0.988246	0.000182553	0.00171668	1239	ENSG00000199196	34674848	34674975	-	upstream	-52685	52685	NearestLocation	NA
chr12	90242462	90242862	401	*	5.98187	5.50326	6.34065	-0.804086	0.000183057	0.00171668	1120	ENSG00000258216	90276442	90383066	+	upstream	-33980	33580	NearestLocation	NA
chr7	136228717	136229117	401	*	4.77764	3.83098	5.34437	-1.33603	0.000183576	0.00171668	4142	ENSG00000226066	136170404	136173065	+	downstream	58313	55652	NearestLocation	NA
chr3	186983381	186983781	401	*	4.67211	3.63833	5.26816	-1.41212	0.000183588	0.00171668	3057	LRG_349	186933873	187009810	-	inside	26429	26029	NearestLocation	NA
chr3	186983381	186983781	401	*	4.67211	3.63833	5.26816	-1.41212	0.000183588	0.00171668	3057	ENSG00000127241	186935942	187009810	-	inside	26429	26029	NearestLocation	MASP1
chr22	33722474	33722874	401	*	4.52979	3.28585	5.18769	-1.56778	0.000189639	0.0017663	2740	ENSG00000230741	33716851	33718799	+	downstream	5623	3675	NearestLocation	NA
chr1	100315863	100316263	401	*	5.02098	4.22295	5.53181	-1.189	0.000189652	0.0017663	214	ENSG00000162688	100315640	100389579	+	inside	223	223	NearestLocation	AGL
chr22	18403060	18403460	401	*	3.94671	2.15433	4.72181	-1.85058	0.000196476	0.00182285	2701	ENSG00000207780	18463634	18463727	-	downstream	60667	60174	NearestLocation	MIR648
chr2	73298785	73299185	401	*	4.83228	3.9197	5.38688	-1.30114	0.000196505	0.00182285	2287	ENSG00000144040	73169165	73302747	-	inside	3962	3562	NearestLocation	SFXN5
chr7	35485777	35486177	401	*	5.58742	5.0013	6.00304	-0.949311	0.000198339	0.00183621	4002	ENSG00000235464	35535631	35549873	-	downstream	64096	49454	NearestLocation	NA
chr4	26861998	26862398	401	*	4.15093	2.63935	4.87276	-1.72522	0.000198736	0.00183624	3119	ENSG00000240005	26861428	26862221	-	overlapStart	223	177	NearestLocation	NA
chr9	7799620	7800020	401	*	5.31159	4.63782	5.76907	-1.0526	0.000199141	0.00183635	4424	ENSG00000273056	7786105	7786688	-	upstream	-12932	12932	NearestLocation	NA
chrY	21906636	21907036	401	*	5.27614	4.58295	5.74239	-1.07236	0.000199897	0.00183968	4666	ENSG00000012817	21865751	21906825	-	overlapStart	189	189	NearestLocation	KDM5D
chr9	99814111	99814511	401	*	4.32061	3.00011	4.99832	-1.61688	0.000201518	0.00185095	4535	ENSG00000136943	99794940	99801925	-	upstream	-12186	12186	NearestLocation	CTSV
chr1	206837372	206837772	401	*	5.06462	4.29106	5.56545	-1.16214	0.000202284	0.00185434	390	ENSG00000252853	206855308	206855380	+	upstream	-17936	17536	NearestLocation	NA
chr4	123653681	123654081	401	*	4.71872	3.73739	5.29741	-1.36279	0.00020491	0.00187473	3252	ENSG00000181004	123653857	123666098	+	overlapStart	-176	176	NearestLocation	BBS12
chr20	25210747	25211147	401	*	3.85071	1.83098	4.66086	-1.92026	0.000205427	0.00187578	2597	ENSG00000268302	25207122	25207370	-	upstream	-3377	3377	NearestLocation	NA
chr9	69735297	69735697	401	*	4.77048	3.83098	5.33471	-1.32576	0.000206408	0.00188105	4474	ENSG00000225883	69718152	69721729	-	upstream	-13568	13568	NearestLocation	BMS1P11
chr2	121693213	121693613	401	*	4.71957	3.73739	5.29854	-1.36273	0.000207761	0.0018897	2358	ENSG00000271709	121623953	121624978	-	upstream	-68235	68235	NearestLocation	NA
chr5	62489883	62490283	401	*	4.40271	3.15147	5.06256	-1.56925	0.000210033	0.00190664	3439	ENSG00000248185	62597350	62597883	+	upstream	-107467	107067	NearestLocation	LOC100420027
chr3	96554056	96554456	401	*	4.47969	3.28976	5.12278	-1.52663	0.00021134	0.00191148	2931	ENSG00000080224	96533425	97471304	+	inside	20631	20631	NearestLocation	EPHA6
chr2	221819674	221820074	401	*	4.03769	2.41594	4.7819	-1.77469	0.000211385	0.00191148	2520	ENSG00000224819	221655798	221662613	+	downstream	163876	157061	NearestLocation	NA
chr16	14123543	14123943	401	*	4.13446	2.63731	4.8532	-1.71382	0.000213094	0.0019232	1662	ENSG00000261856	14112737	14114934	-	upstream	-8609	8609	NearestLocation	LINC02186
chr17	17454694	17455094	401	*	4.66591	3.63731	5.26029	-1.40117	0.000214443	0.00192817	1825	ENSG00000206730	17481945	17482053	+	upstream	-27251	26851	NearestLocation	RNU6-468P
chr17	922769	923169	401	*	4.33415	2.99692	5.01603	-1.62256	0.000214517	0.00192817	1776	ENSG00000264429	925716	925799	-	downstream	3030	2547	NearestLocation	MIR3183
chr3	111454155	111454555	401	*	5.86103	5.35485	6.235	-0.838323	0.000214884	0.00192817	2946	ENSG00000144824	111451344	111695364	+	inside	2811	2811	NearestLocation	PHLDB2
chr15	94498412	94498812	401	*	5.70245	5.15183	6.10001	-0.897636	0.000217032	0.00194202	1631	ENSG00000258785	94443930	94527379	+	inside	54482	28567	NearestLocation	LINC01580
chr15	30180799	30181199	401	*	3.77703	1.41355	4.62957	-1.98779	0.000217384	0.00194202	1496	ENSG00000259523	30114834	30116284	+	downstream	65965	64515	NearestLocation	NA
chr8	108097851	108098251	401	*	4.81888	3.91886	5.36891	-1.28962	0.000217676	0.00194202	4352	ENSG00000254146	108185428	108186037	-	downstream	88186	87177	NearestLocation	HMGB1P46
chr6	17962726	17963126	401	*	4.24011	2.83455	4.93836	-1.66431	0.000220647	0.00196079	3686	ENSG00000220920	17953803	17954161	+	downstream	8923	8565	NearestLocation	RPS12P12
chr1	6515143	6515543	401	*	3.935	2.15147	4.7086	-1.83698	0.000220966	0.00196079	15	ENSG00000231868	6503094	6507066	-	upstream	-8077	8077	NearestLocation	NA
chr2	209130625	209131025	401	*	4.22191	2.83098	4.91673	-1.65566	0.000221041	0.00196079	2489	ENSG00000115020	209130991	209223475	+	overlapStart	-366	34	NearestLocation	PIKFYVE
chr2	220509866	220510266	401	*	4.66679	3.63731	5.26145	-1.4004	0.000223568	0.00197945	2517	ENSG00000267919	220509812	220510353	+	inside	54	54	NearestLocation	NA
chr7	8272578	8272978	401	*	4.22667	2.83098	4.92261	-1.65619	0.000224088	0.00198029	3968	ENSG00000244239	8301863	8302451	+	upstream	-29285	28885	NearestLocation	NA
chr17	35969256	35969656	401	*	4.86679	4.00011	5.40442	-1.25634	0.000227407	0.00200471	1849	ENSG00000006114	35874900	35969544	-	overlapStart	288	112	NearestLocation	NA
chr6	76200926	76201326	401	*	4.66316	3.64037	5.25564	-1.39828	0.00022798	0.00200471	3771	ENSG00000118407	76001575	76203454	-	inside	2528	2128	NearestLocation	FILIP1
chr12	96149208	96149608	401	*	5.0111	4.22159	5.51848	-1.17784	0.00022814	0.00200471	1137	ENSG00000074527	96051583	96184930	-	inside	35722	35322	NearestLocation	NTN4
chr10	90712581	90712981	401	*	4.13735	2.63935	4.85627	-1.71029	0.000229962	0.00201692	636	ENSG00000180139	90692400	90700368	+	downstream	20181	12213	NearestLocation	ACTA2-AS1
chr1	25566426	25566826	401	*	6.0841	5.63782	6.42445	-0.757932	0.000233652	0.00204544	61	ENSG00000117614	25549170	25558993	-	upstream	-7433	7433	NearestLocation	SYF2
chr11	78513155	78513555	401	*	4.02025	2.41594	4.76105	-1.76076	0.000235835	0.00206069	856	ENSG00000254563	78460295	78467525	+	downstream	52860	45630	NearestLocation	NA
chr1	63249541	63249941	401	*	4.87233	4.0009	5.41176	-1.25701	0.000236891	0.00206605	145	ENSG00000125703	63249806	63331184	+	overlapStart	-265	135	NearestLocation	ATG4C
chr9	100395187	100395587	401	*	4.70897	3.73834	5.284	-1.3507	0.000238156	0.0020732	4539	ENSG00000136937	100395908	100436030	+	upstream	-721	321	NearestLocation	NCBP1
chr16	19599921	19600321	401	*	4.46515	3.29106	5.10376	-1.51312	0.00023879	0.00207485	1666	ENSG00000103544	19566562	19718115	+	inside	33359	33359	NearestLocation	VPS35L
chr17	16189328	16189728	401	*	3.81859	1.83098	4.62417	-1.89706	0.000241879	0.00209748	1822	ENSG00000221355	16185328	16185402	+	downstream	4000	3926	NearestLocation	MIR1288
chr2	20101580	20101980	401	*	4.21018	2.83098	4.90222	-1.64397	0.000242432	0.00209748	2191	ENSG00000183891	20096404	20101747	-	overlapStart	167	167	NearestLocation	TTC32
chr1	109224274	109224674	401	*	4.22752	2.82919	4.92407	-1.65278	0.000242743	0.00209748	221	ENSG00000134186	109234945	109244425	+	upstream	-10671	10271	NearestLocation	PRPF38B
chr3	140661173	140661573	401	*	3.82332	1.83098	4.62957	-1.89676	0.000244038	0.00210195	2996	ENSG00000114120	140660672	140698775	+	inside	501	501	NearestLocation	SLC25A36
chr3	69349388	69349788	401	*	5.33949	4.68822	5.78658	-1.02455	0.000244161	0.00210195	2895	ENSG00000239263	69520603	69521683	-	downstream	172295	170815	NearestLocation	NA
chr15	88420605	88421005	401	*	4.95941	4.15219	5.47393	-1.19581	0.000244765	0.00210326	1624	ENSG00000259560	87975289	88247083	-	upstream	-173522	173522	NearestLocation	NA
chr2	24526952	24527352	401	*	4.81091	3.91802	5.35832	-1.27914	0.000246045	0.00211038	2196	ENSG00000232963	24553271	24553543	+	upstream	-26319	25919	NearestLocation	NA
chr2	107707668	107708068	401	*	5.90304	5.41594	6.26654	-0.812667	0.000247748	0.00211977	2331	ENSG00000226905	107579649	107580130	+	downstream	128019	127538	NearestLocation	NA
chr7	110082564	110082964	401	*	3.91584	2.14861	4.68665	-1.82222	0.000248537	0.00211977	4102	ENSG00000226965	110072296	110174811	-	inside	92247	10268	NearestLocation	NA
chr3	52486806	52487206	401	*	5.26741	4.5856	5.72853	-1.05571	0.000248968	0.00211977	2865	LRG_378	52485107	52488057	-	inside	1251	851	NearestLocation	NA
chr12	19189502	19189902	401	*	4.21172	2.83276	4.90371	-1.64289	0.000249253	0.00211977	1000	ENSG00000227525	19241974	19242825	+	upstream	-52472	52072	NearestLocation	RPL7P6
chr14	75068802	75069202	401	*	4.81011	3.91802	5.35724	-1.27865	0.000249411	0.00211977	1440	ENSG00000119681	74964873	75079306	-	inside	10504	10104	NearestLocation	LTBP2
chr20	32276712	32277112	401	*	4.46759	3.28846	5.10764	-1.5125	0.00025075	0.00212727	2606	ENSG00000101412	32263489	32274210	-	upstream	-2502	2502	NearestLocation	E2F1
chr1	173683957	173684357	401	*	4.39298	3.15433	5.04946	-1.55473	0.000251358	0.00212856	326	ENSG00000076321	173684080	173755840	+	overlapStart	-123	123	NearestLocation	KLHL20
chr17	1750418	1750818	401	*	4.71091	3.7393	5.28628	-1.34978	0.000252758	0.00213654	1783	ENSG00000108958	1761333	1761740	-	downstream	11322	10515	NearestLocation	NA
chr12	105727598	105727998	401	*	3.76219	0.830976	4.66437	-2.02186	0.000253538	0.00213925	1148	ENSG00000264749	105721684	105721770	-	upstream	-5828	5828	NearestLocation	NA
chr5	77540936	77541336	401	*	4.81057	3.9197	5.35724	-1.27819	0.000254281	0.00214165	3467	ENSG00000249372	77518008	77518341	+	downstream	22928	22595	NearestLocation	NA
chr13	66917335	66917735	401	*	3.97208	2.14573	4.75282	-1.83995	0.000261901	0.00220186	1291	ENSG00000234527	66878003	66897693	+	downstream	39332	19642	NearestLocation	NA
chr8	74395815	74396215	401	*	4.65755	3.63833	5.24887	-1.38796	0.000262905	0.00220363	4295	ENSG00000254273	74423511	74423889	-	downstream	28074	27296	NearestLocation	NA
chr8	48572305	48572705	401	*	4.52898	3.41475	5.1501	-1.46383	0.000263056	0.00220363	4262	ENSG00000207369	48580333	48580439	+	upstream	-8028	7628	NearestLocation	RNU6-665P
chr22	32454809	32455209	401	*	4.90686	4.07777	5.43003	-1.21518	0.000265986	0.00222374	2736	ENSG00000100170	32439019	32509016	+	inside	15790	15790	NearestLocation	SLC5A1
chr18	55253590	55253990	401	*	4.96553	4.15362	5.48192	-1.19587	0.000266411	0.00222374	2020	ENSG00000066926	55215515	55254004	-	inside	414	14	NearestLocation	FECH
chr5	36701492	36701892	401	*	4.9095	4.07928	5.43312	-1.21559	0.000267433	0.00222829	3404	ENSG00000250155	36666316	36725297	-	inside	23805	23405	NearestLocation	LOC107986412
chr6	73471485	73471885	401	*	5.04683	4.29106	5.54024	-1.14147	0.000269413	0.00224078	3768	ENSG00000233844	73340223	73388282	+	downstream	131262	83203	NearestLocation	NA
chr6	93377588	93377988	401	*	5.1361	4.41773	5.61349	-1.10174	0.000270948	0.00224954	3805	ENSG00000265419	93354459	93354526	+	downstream	23129	23062	NearestLocation	NA
chr15	47815945	47816345	401	*	3.89771	2.15433	4.66437	-1.80924	0.000271781	0.00225245	1540	ENSG00000259740	47817366	47819953	+	upstream	-1421	1021	NearestLocation	NA
chr3	31857210	31857610	401	*	4.58695	3.53086	5.19013	-1.41846	0.000272589	0.00225313	2824	ENSG00000223965	31835962	31837667	+	downstream	21248	19543	NearestLocation	NA
chr10	36730422	36730822	401	*	5.22468	4.53142	5.69097	-1.06744	0.000272829	0.00225313	542	ENSG00000237002	36727544	36731320	+	inside	2878	498	NearestLocation	NA
chr19	3761458	3761858	401	*	5.17574	4.47512	5.6453	-1.07975	0.000275359	0.00227001	2048	ENSG00000011132	3750817	3761697	-	overlapStart	239	161	NearestLocation	APBA3
chr17	76252715	76253115	401	*	4.58421	3.4207	5.2198	-1.50102	0.000278733	0.00229377	1926	ENSG00000267676	76244574	76250497	-	upstream	-2218	2218	NearestLocation	NA
chr2	224403608	224404008	401	*	4.95208	4.15362	5.46308	-1.18543	0.000279777	0.00229831	2528	ENSG00000235610	224370194	224375651	+	downstream	33414	27957	NearestLocation	NA
chr10	103428205	103428605	401	*	4.75136	3.83187	5.30845	-1.30178	0.00028274	0.00231856	667	ENSG00000107829	103370423	103455052	-	inside	26847	26447	NearestLocation	FBXW4
chr18	47813920	47814320	401	*	5.44266	4.83053	5.87109	-0.978776	0.000283573	0.00232132	2009	ENSG00000154832	47808713	47814674	-	inside	754	354	NearestLocation	CXXC1
chr4	144924371	144924771	401	*	4.80312	3.91802	5.34765	-1.26809	0.000284294	0.00232314	3282	ENSG00000248828	144874788	145047512	+	inside	49583	49583	NearestLocation	NA
chr1	93939814	93940214	401	*	4.37477	3.1529	5.02671	-1.53948	0.000288914	0.00235677	204	ENSG00000212601	93953890	93954009	-	downstream	14195	13676	NearestLocation	RNA5SP53
chr6	143206432	143206832	401	*	4.80198	3.9197	5.34547	-1.26703	0.000292194	0.00237937	3898	ENSG00000010818	143072604	143266338	-	inside	59906	59506	NearestLocation	HIVEP2
chr6	125858260	125858660	401	*	4.36639	3.1529	5.01603	-1.53148	0.000296322	0.00240878	3858	ENSG00000228704	125746773	125766329	-	upstream	-91931	91931	NearestLocation	NA
chr8	23279591	23279991	401	*	3.72129	0.830976	4.62056	-1.99643	0.000303525	0.00246304	4229	ENSG00000134013	23154702	23282841	-	inside	3250	2850	NearestLocation	LOXL2
chr10	29402175	29402575	401	*	4.19783	2.83455	4.88606	-1.62523	0.000304524	0.00246324	521	ENSG00000120563	29577990	29607257	+	upstream	-175815	175415	NearestLocation	LYZL1
chr1	95538555	95538955	401	*	4.53109	3.29106	5.18794	-1.54631	0.000304742	0.00246324	209	ENSG00000172339	95439963	95538501	-	upstream	-54	54	NearestLocation	ALG14
chr22	46742485	46742885	401	*	4.51854	3.41475	5.13651	-1.45094	0.000305133	0.00246324	2776	ENSG00000100416	46726772	46753237	+	inside	15713	10352	NearestLocation	TRMU
chr5	70869417	70869817	401	*	4.0919	2.63935	4.80086	-1.67119	0.000310288	0.00250052	3458	ENSG00000131844	70883115	70954531	+	upstream	-13698	13298	NearestLocation	MCCC2
chr1	160881254	160881654	401	*	4.28245	3.00328	4.94963	-1.57388	0.000312952	0.00251764	294	ENSG00000213080	160864770	160865866	+	downstream	16484	15388	NearestLocation	NA
chr7	78078279	78078679	401	*	5.16846	4.47512	5.63478	-1.07023	0.000315349	0.00253256	4061	ENSG00000226230	78115847	78116345	+	upstream	-37568	37168	NearestLocation	NA
chr5	122245436	122245836	401	*	4.18241	2.82919	4.8682	-1.61554	0.000316065	0.00253357	3533	ENSG00000064652	122179134	122365049	+	inside	66302	66302	NearestLocation	SNX24
chr16	57562549	57562949	401	*	4.94626	4.1529	5.45519	-1.17571	0.000316561	0.00253357	1707	ENSG00000135736	57546090	57570511	-	inside	7962	7562	NearestLocation	CCDC102A
chr2	55315079	55315479	401	*	4.94605	4.15219	5.45519	-1.17566	0.00031803	0.00253879	2261	ENSG00000266376	55335846	55335939	+	upstream	-20767	20367	NearestLocation	NA
chr19	20193319	20193719	401	*	3.98653	2.41832	4.72012	-1.72764	0.000318301	0.00253879	2093	ENSG00000240673	20190627	20191348	-	upstream	-1971	1971	NearestLocation	NA
chr20	15985077	15985477	401	*	4.01298	2.41355	4.75282	-1.74033	0.000319391	0.00254187	2581	ENSG00000225622	16204395	16205180	-	downstream	220103	218918	NearestLocation	PPIAP17
chr6	37093863	37094263	401	*	4.44629	3.29106	5.0795	-1.48771	0.000319777	0.00254187	3722	ENSG00000216412	37059088	37059582	+	downstream	34775	34281	NearestLocation	NA
chr13	93880722	93881122	401	*	3.70177	1.41355	4.54597	-1.93436	0.000321208	0.00254863	1313	ENSG00000183098	93879095	95059655	+	inside	1627	1627	NearestLocation	GPC6
chr5	52939238	52939638	401	*	4.9444	4.15147	5.45316	-1.17515	0.000321719	0.00254863	3424	ENSG00000238508	52905417	52905488	+	downstream	33821	33750	NearestLocation	NA
chr2	129351652	129352052	401	*	5.16704	4.47455	5.63298	-1.06972	0.00032262	0.00255143	2366	ENSG00000237532	129338065	129339150	-	upstream	-12502	12502	NearestLocation	NA
chr9	86958112	86958512	401	*	5.08385	4.3536	5.56639	-1.10727	0.000325723	0.00256918	4506	ENSG00000197506	86890372	86955672	-	upstream	-2440	2440	NearestLocation	SLC28A3
chr5	172623072	172623472	401	*	4.46082	3.28976	5.09858	-1.50044	0.000325965	0.00256918	3634	ENSG00000254200	172652839	172653426	-	downstream	30354	29367	NearestLocation	RPL7AP33
chr2	114223325	114223725	401	*	4.46196	3.15004	5.13752	-1.59024	0.000332319	0.00261484	2351	ENSG00000238091	114204992	114205429	-	upstream	-17896	17896	NearestLocation	NA
chr14	90863215	90863615	401	*	3.97372	2.41594	4.70519	-1.71823	0.000333477	0.00261953	1456	ENSG00000198668	90862846	90874605	+	inside	369	369	NearestLocation	CALM1
chr3	66955542	66955942	401	*	3.76332	1.83098	4.56075	-1.85314	0.000338092	0.00264779	2888	ENSG00000163376	67048727	67061634	+	upstream	-93185	92785	NearestLocation	KBTBD8
chr18	45494434	45494834	401	*	3.86511	2.15433	4.62597	-1.78096	0.000338209	0.00264779	2006	ENSG00000175387	45357922	45457515	-	upstream	-36919	36919	NearestLocation	SMAD2
chr17	59444240	59444640	401	*	6.61754	6.27384	6.89491	-0.605244	0.000344397	0.00268896	1894	ENSG00000266934	59460146	59462041	+	upstream	-15906	15506	NearestLocation	NA
chr2	224609274	224609674	401	*	3.86816	2.15433	4.62957	-1.77989	0.000345126	0.00268896	2529	ENSG00000226539	224569338	224570055	+	downstream	39936	39219	NearestLocation	NA
chr6	82462798	82463198	401	*	3.77033	1.83455	4.56827	-1.85191	0.00034522	0.00268896	3781	ENSG00000112773	82201156	82462491	-	upstream	-307	307	NearestLocation	TENT5A
chr17	13297104	13297504	401	*	4.35578	3.1529	5.00249	-1.51766	0.000345773	0.00268896	1816	ENSG00000234634	13202501	13210077	-	upstream	-87027	87027	NearestLocation	LINC02093
chr10	99261541	99261941	401	*	3.68612	0.830976	4.58282	-1.97728	0.000346475	0.00268994	655	ENSG00000165886	99258625	99330966	+	inside	2916	2916	NearestLocation	UBTD1
chr11	121201548	121201948	401	*	6.02936	5.58613	6.36794	-0.749982	0.000349506	0.00270896	927	ENSG00000232460	121232559	121233574	-	downstream	32026	30611	NearestLocation	NA
chr5	79500744	79501144	401	*	4.17071	2.83098	4.8532	-1.60252	0.000353157	0.00272762	3470	ENSG00000239159	79535306	79535408	-	downstream	34664	34162	NearestLocation	NA
chr5	138872273	138872673	401	*	3.68145	1.41355	4.52332	-1.92081	0.000353708	0.00272762	3571	ENSG00000249689	138872123	138872690	+	inside	150	17	NearestLocation	NA
chr13	41635123	41635523	401	*	4.18591	2.83455	4.87125	-1.61046	0.000353911	0.00272762	1249	ENSG00000120688	41635410	41658137	+	overlapStart	-287	113	NearestLocation	WBP4
chr14	37494366	37494766	401	*	5.86356	5.38541	6.22206	-0.802534	0.000354252	0.00272762	1384	ENSG00000266327	37421514	37421596	-	upstream	-72770	72770	NearestLocation	MIR4503
chr8	8960148	8960548	401	*	3.96947	2.41594	4.70006	-1.713	0.000358173	0.00275327	4193	ENSG00000239078	8929965	8930026	-	upstream	-30122	30122	NearestLocation	RNU7-55P
chr4	53719483	53719883	401	*	4.57385	3.52976	5.17322	-1.40114	0.000359251	0.0027555	3143	ENSG00000128045	53728457	53733000	+	upstream	-8974	8574	NearestLocation	RASL11B
chr8	102063869	102064269	401	*	4.26708	3.00011	4.93109	-1.55931	0.000359644	0.0027555	4344	ENSG00000248599	102064282	102088479	+	upstream	-413	13	NearestLocation	FLJ42969
chr15	85360918	85361318	401	*	5.9113	5.44612	6.26249	-0.784599	0.000360529	0.00275775	1620	ENSG00000136383	85359911	85416713	+	inside	1007	1007	NearestLocation	ALPK3
chr7	3203980	3204380	401	*	5.35964	4.73596	5.79366	-0.988299	0.000361519	0.0027608	3962	ENSG00000217455	3179868	3214287	-	inside	10307	9907	NearestLocation	NA
chr8	11499753	11500153	401	*	4.07416	2.64139	4.77866	-1.6543	0.000362147	0.00276088	4204	ENSG00000136574	11534468	11617511	+	upstream	-34715	34315	NearestLocation	GATA4
chr12	574358	574758	401	*	3.97149	2.41116	4.70348	-1.71279	0.000362713	0.00276088	957	ENSG00000139044	569530	672675	+	inside	4828	4828	NearestLocation	B4GALNT3
chr15	47624736	47625136	401	*	5.07534	4.35547	5.55338	-1.0971	0.000368088	0.00278834	1537	ENSG00000259554	47566380	47567361	+	downstream	58356	57375	NearestLocation	NA
chr15	70434966	70435366	401	*	5.16451	4.47397	5.62957	-1.06121	0.000368155	0.00278834	1590	ENSG00000140332	70340129	70390515	-	upstream	-44451	44451	NearestLocation	TLE3
chr3	193952954	193953354	401	*	5.07628	4.35423	5.55527	-1.0974	0.000368438	0.00278834	3078	ENSG00000238097	193965437	193975561	+	upstream	-12483	12083	NearestLocation	LINC02037
chr22	19711559	19711959	401	*	4.25722	3.0017	4.9182	-1.55077	0.00036871	0.00278834	2707	ENSG00000203618	19710468	19712294	+	inside	1091	335	NearestLocation	GP1BB
chr5	36638139	36638539	401	*	3.74671	1.82739	4.54216	-1.83896	0.000375941	0.00283582	3402	ENSG00000079215	36606457	36688436	+	inside	31682	31682	NearestLocation	SLC1A3
chr1	24969153	24969553	401	*	3.74765	1.83455	4.54216	-1.83886	0.000376205	0.00283582	59	ENSG00000133226	24958207	24999758	+	inside	10946	10946	NearestLocation	SRRM1
chr4	85654511	85654911	401	*	4.56561	3.52976	5.16233	-1.39191	0.000379472	0.00285583	3189	ENSG00000239466	85608881	85609171	-	upstream	-45340	45340	NearestLocation	RN7SL552P
chr13	53183125	53183525	401	*	4.98301	4.22363	5.47793	-1.13769	0.000381039	0.00286301	1275	ENSG00000139675	53191605	53217919	+	upstream	-8480	8080	NearestLocation	HNRNPA1L2
chr10	126030386	126030786	401	*	3.95549	2.41594	4.6832	-1.70213	0.000381721	0.0028633	714	ENSG00000065154	126085872	126107545	-	downstream	77159	55086	NearestLocation	OAT
chr2	38603230	38603630	401	*	3.95733	2.41832	4.68493	-1.70223	0.000382306	0.0028633	2230	ENSG00000119787	38522022	38604427	-	inside	1197	797	NearestLocation	ATL2
chr11	6633440	6633840	401	*	4.79769	3.91802	5.34021	-1.25462	0.000383176	0.00286522	735	ENSG00000166337	6627526	6633898	-	inside	458	58	NearestLocation	TAF10
chr14	62051013	62051413	401	*	3.95508	2.41355	4.6832	-1.70115	0.000387877	0.00289012	1416	ENSG00000250548	62023031	62037371	-	upstream	-13642	13642	NearestLocation	LINC01303
chr6	17707002	17707402	401	*	4.78477	3.91718	5.32275	-1.24463	0.000388127	0.00289012	3685	ENSG00000124789	17615269	17706656	-	upstream	-346	346	NearestLocation	NUP153
chr22	43497434	43497834	401	*	5.11702	4.41653	5.58653	-1.07388	0.000388363	0.00289012	2769	ENSG00000100290	43506754	43525718	+	upstream	-9320	8920	NearestLocation	BIK
chr4	132122401	132122801	401	*	4.17353	2.83276	4.85627	-1.5979	0.000392671	0.00291527	3263	ENSG00000206782	132194397	132194503	+	upstream	-71996	71596	NearestLocation	RNU6-224P
chr1	1051634	1052034	401	*	4.41993	3.29106	5.04542	-1.46258	0.000392993	0.00291527	3	ENSG00000131591	1017198	1051741	-	overlapStart	107	107	NearestLocation	C1orf159
chr10	30154576	30154976	401	*	4.06173	2.63731	4.76433	-1.64262	0.000394303	0.00291684	528	ENSG00000237936	30179961	30180396	-	downstream	25820	24985	NearestLocation	NA
chr1	158969634	158970034	401	*	3.66311	1.41832	4.50228	-1.90586	0.000394455	0.00291684	291	ENSG00000163565	158969758	159024945	+	overlapStart	-124	124	NearestLocation	IFI16
chr7	30265294	30265694	401	*	4.25489	3.0017	4.91525	-1.54707	0.000395164	0.00291746	3995	ENSG00000227017	30216003	30218630	-	upstream	-46664	46664	NearestLocation	NA
chr15	66971966	66972366	401	*	4.83603	4.0009	5.36157	-1.21302	0.000396642	0.00292374	1576	ENSG00000137834	66994566	67074338	+	upstream	-22600	22200	NearestLocation	SMAD6
chr10	124914425	124914825	401	*	5.02467	4.29041	5.50894	-1.11151	0.000398774	0.00293483	712	ENSG00000154473	124913793	124924886	+	inside	632	632	NearestLocation	BUB3
chr11	130607781	130608181	401	*	4.57252	3.53197	5.17075	-1.39681	0.00040221	0.00295545	951	ENSG00000255352	130659126	130660920	-	downstream	53139	50945	NearestLocation	PPP1R10P1
chr1	201700676	201701076	401	*	6.24891	5.85345	6.55896	-0.682814	0.000403391	0.00295947	373	ENSG00000200942	201702534	201702633	+	upstream	-1858	1458	NearestLocation	RNU6-501P
chr8	30240351	30240751	401	*	4.06116	2.64139	4.76269	-1.64067	0.000405651	0.00297138	4238	ENSG00000157110	30241944	30429778	+	upstream	-1593	1193	NearestLocation	RBPMS
chr14	91091054	91091454	401	*	4.06344	2.63935	4.76597	-1.64091	0.000408464	0.00298269	1457	ENSG00000259163	91108982	91115238	+	upstream	-17928	17528	NearestLocation	LOC101928909
chr5	167230091	167230491	401	*	3.64881	0.838111	4.54216	-1.95346	0.000408474	0.00298269	3616	ENSG00000221741	167297550	167297670	-	downstream	67579	67059	NearestLocation	NA
chr6	159218330	159218730	401	*	4.8808	4.07928	5.39303	-1.18184	0.000410646	0.00299146	3929	ENSG00000233893	159239043	159241625	+	upstream	-20713	20313	NearestLocation	EZR-AS1
chr15	45341173	45341573	401	*	3.6538	1.41355	4.49243	-1.90082	0.000411392	0.00299146	1531	ENSG00000252171	45339301	45339413	-	upstream	-1760	1760	NearestLocation	NA
chr1	164681448	164681848	401	*	4.6768	3.73834	5.24065	-1.31082	0.000411698	0.00299146	303	ENSG00000269887	164649322	164650036	+	downstream	32126	31412	NearestLocation	NA
chr1	58974189	58974589	401	*	4.42038	3.28846	5.04677	-1.46129	0.000412239	0.00299146	137	ENSG00000173406	57460451	59012406	-	inside	38217	37817	NearestLocation	DAB1
chr3	31803606	31804006	401	*	4.24544	3.00011	4.90371	-1.53774	0.000415298	0.00300898	2823	ENSG00000223965	31835962	31837667	+	upstream	-32356	31956	NearestLocation	NA
chr12	96084652	96085052	401	*	4.24577	3.0017	4.90371	-1.53761	0.000415948	0.00300901	1136	ENSG00000257150	96043031	96067775	+	downstream	41621	16877	NearestLocation	PGAM1P5
chr2	3527008	3527408	401	*	4.87983	4.07853	5.39198	-1.18125	0.000420028	0.00303383	2164	ENSG00000182551	3501132	3523507	-	upstream	-3501	3501	NearestLocation	ADI1
chr1	12533064	12533464	401	*	4.93263	4.1529	5.436	-1.16104	0.000422624	0.00304785	37	ENSG00000239149	12567300	12567451	+	upstream	-34236	33836	NearestLocation	SNORA59B;SNORA59A
chr9	94707554	94707954	401	*	4.4183	3.28846	5.04407	-1.4596	0.000423774	0.00305143	4524	ENSG00000169071	94325373	94712444	-	inside	4890	4490	NearestLocation	ROR2
chr2	220436665	220437065	401	*	3.75544	1.83098	4.55167	-1.82903	0.000424808	0.00305416	2515	ENSG00000124006	220415451	220436581	-	upstream	-84	84	NearestLocation	OBSL1
chr15	96731135	96731535	401	*	5.32035	4.6892	5.75793	-0.99056	0.000426419	0.00306103	1632	ENSG00000259359	96714810	96717568	+	downstream	16325	13567	NearestLocation	NA
chr1	190566512	190566912	401	*	3.94095	2.41355	4.66613	-1.68793	0.000427915	0.00306643	357	ENSG00000231175	190594020	190770788	+	upstream	-27508	27108	NearestLocation	LINC01720
chr8	30032147	30032547	401	*	4.93028	4.15433	5.43209	-1.15383	0.000428486	0.00306643	4236	ENSG00000253708	30034070	30038404	-	downstream	6257	1523	NearestLocation	NA
chr4	127671886	127672286	401	*	3.82818	2.15147	4.58282	-1.75021	0.00042965	0.00307006	3259	ENSG00000223620	127484664	127485931	+	downstream	187222	185955	NearestLocation	NA
chr13	21750878	21751278	401	*	3.94323	2.41832	4.66788	-1.68762	0.000431106	0.00307575	1206	ENSG00000173141	21750784	21753223	+	inside	94	94	NearestLocation	MRPL57
chr13	99159525	99159925	401	*	3.64046	1.41832	4.47693	-1.89199	0.000434327	0.00309175	1321	ENSG00000271437	99205497	99206034	+	upstream	-45972	45572	NearestLocation	NA
chr2	2332604	2333004	401	*	5.19355	4.53031	5.64619	-1.03029	0.000434674	0.00309175	2163	ENSG00000186487	1792885	2335032	-	inside	2428	2028	NearestLocation	MYT1L
chr13	51103749	51104149	401	*	4.2451	2.99851	4.90371	-1.53566	0.000435817	0.00309417	1270	ENSG00000229323	51095069	51101585	-	upstream	-2164	2164	NearestLocation	NA
chr16	85568969	85569369	401	*	4.3277	3.1529	4.96652	-1.49065	0.000436341	0.00309417	1753	ENSG00000270124	85613615	85617177	-	downstream	48208	44246	NearestLocation	NA
chr2	187350245	187350645	401	*	3.94385	2.41355	4.66963	-1.68675	0.00043935	0.00311079	2450	ENSG00000065548	187350883	187374090	+	upstream	-638	238	NearestLocation	ZC3H15
chr5	82775154	82775554	401	*	3.73181	1.83811	4.52332	-1.81999	0.000440239	0.00311236	3479	ENSG00000038427	82767284	82878122	+	inside	7870	7870	NearestLocation	VCAN
chr13	111012449	111012849	401	*	4.41726	3.28846	5.04272	-1.45751	0.000444087	0.00313481	1340	ENSG00000187498	110801318	110959496	-	upstream	-52953	52953	NearestLocation	COL4A1
chr2	188575569	188575969	401	*	3.63586	1.40877	4.47293	-1.88795	0.000449984	0.00317164	2451	ENSG00000252004	188607314	188607401	-	downstream	31832	31345	NearestLocation	NA
chr7	136394510	136394910	401	*	3.72245	1.83098	4.51362	-1.81693	0.000451697	0.00317652	4144	ENSG00000231244	136398618	136399935	+	upstream	-4108	3708	NearestLocation	PSMC1P3
chr7	92324531	92324931	401	*	5.31136	4.68871	5.74489	-0.981888	0.000452038	0.00317652	4080	ENSG00000206763	92331022	92331128	-	downstream	6597	6091	NearestLocation	RNU6-10P
chr2	148209645	148210045	401	*	4.48335	3.41713	5.08972	-1.41156	0.000455071	0.00319303	2389	ENSG00000221289	148224198	148224282	-	downstream	14637	14153	NearestLocation	NA
chr12	27346693	27347093	401	*	5.01678	4.29106	5.49736	-1.10098	0.000460683	0.00322273	1013	ENSG00000256226	27258084	27314326	-	upstream	-32367	32367	NearestLocation	NA
chr11	30454292	30454692	401	*	4.77754	3.9197	5.31182	-1.23264	0.000460686	0.00322273	779	ENSG00000255480	30447099	30450815	+	downstream	7193	3477	NearestLocation	NA
chr17	46578278	46578678	401	*	5.31232	4.68822	5.74654	-0.981918	0.000461936	0.00322663	1872	ENSG00000206805	46556459	46556560	+	downstream	21819	21718	NearestLocation	NA
chr11	16958217	16958617	401	*	4.87414	4.07928	5.38369	-1.17158	0.000463255	0.00323101	765	ENSG00000251928	16995968	16996035	-	downstream	37818	37351	NearestLocation	NA
chr2	39727614	39728014	401	*	4.40627	3.28976	5.02807	-1.44751	0.000464907	0.00323342	2233	ENSG00000011566	39476407	39664453	-	upstream	-63161	63161	NearestLocation	MAP4K3
chr22	18726135	18726535	401	*	5.14873	4.47455	5.60639	-1.04201	0.000464986	0.00323342	2704	ENSG00000182824	18721427	18745407	+	inside	4708	4708	NearestLocation	FAM230E
chr4	83821545	83821945	401	*	4.87566	4.07928	5.38582	-1.17165	0.000471735	0.00327547	3187	ENSG00000168152	83821837	83841122	+	overlapStart	-292	108	NearestLocation	THAP9
chr4	45326650	45327050	401	*	3.92418	2.41594	4.6453	-1.67351	0.000475991	0.00330011	3136	ENSG00000248320	45325270	45328045	-	inside	1395	995	NearestLocation	NA
chr3	152878888	152879288	401	*	4.33244	3.15433	4.9722	-1.48829	0.000477296	0.00330332	3016	ENSG00000244268	152874300	152879564	-	inside	676	276	NearestLocation	NA
chr3	178038226	178038626	401	*	6.10451	5.68846	6.42704	-0.709856	0.00047817	0.00330332	3046	ENSG00000197584	177990720	178562217	+	inside	47506	47506	NearestLocation	KCNMB2
chr1	183256483	183256883	401	*	4.82312	4.0017	5.34328	-1.1995	0.000478579	0.00330332	341	ENSG00000233562	183235737	183236420	+	downstream	20746	20063	NearestLocation	RPS3AP8
chr19	13885044	13885444	401	*	3.60947	0.830976	4.50031	-1.92944	0.000481328	0.00331224	2077	ENSG00000104979	13884982	13889276	+	inside	62	62	NearestLocation	C19orf53
chr1	45285379	45285779	401	*	5.51138	5.87429	5.02534	0.806519	0.000481853	0.00331224	117	ENSG00000202444	45285555	45285669	-	includeFeature	290	110	NearestLocation	RNU5E-6P
chr5	146150625	146151025	401	*	4.2295	3.0017	4.88305	-1.52171	0.000483629	0.00331224	3583	ENSG00000265875	146114398	146114467	+	downstream	36227	36158	NearestLocation	NA
chr17	12638302	12638702	401	*	5.41545	4.83098	5.83024	-0.938955	0.000484317	0.00331224	1814	ENSG00000273452	12626199	12661542	+	inside	12103	12103	NearestLocation	NA
chr19	5128549	5128949	401	*	3.61874	1.41355	4.45316	-1.87671	0.000484337	0.00331224	2052	ENSG00000267550	5178130	5178475	+	upstream	-49581	49181	NearestLocation	NA
chr7	93905402	93905802	401	*	3.61926	1.41832	4.45316	-1.8767	0.000484351	0.00331224	4083	ENSG00000164692	94023873	94060544	+	upstream	-118471	118071	NearestLocation	COL1A2
chr7	93905402	93905802	401	*	3.61926	1.41832	4.45316	-1.8767	0.000484351	0.00331224	4083	LRG_2	94023873	94060544	+	upstream	-118471	118071	NearestLocation	NA
chr12	94135596	94136340	745	*	4.87143	4.07777	5.38049	-1.1702	0.00048484	0.00331224	1133	ENSG00000258274	94101567	94131599	-	upstream	-3997	3997	NearestLocation	LOC101928731
chr4	65369126	65369526	401	*	3.61693	1.41355	4.45113	-1.8757	0.000488406	0.00333173	3160	ENSG00000250768	65296627	65298933	+	downstream	72499	70193	NearestLocation	NA
chr4	23124302	23124702	401	*	3.93515	2.41355	4.6591	-1.67791	0.000491753	0.00334966	3106	ENSG00000249645	23107125	23125110	+	inside	17177	408	NearestLocation	NA
chr13	29292789	29293189	401	*	4.61106	3.63935	5.18647	-1.33467	0.000493183	0.00335451	1220	ENSG00000139508	29274201	29293107	-	overlapStart	318	82	NearestLocation	SLC46A3
chr17	12538521	12538921	401	*	3.61511	1.41355	4.4491	-1.87367	0.000497006	0.00337559	1812	ENSG00000141052	12569207	12672266	+	upstream	-30686	30286	NearestLocation	MYOCD
chr1	236852018	236852418	401	*	4.9656	4.22363	5.45316	-1.11626	0.000500628	0.00339468	447	ENSG00000077522	236849754	236927931	+	inside	2264	2264	NearestLocation	ACTN2
chr7	143799155	143799555	401	*	5.82901	5.35578	6.18476	-0.792329	0.000501272	0.00339468	4154	ENSG00000221858	143792141	143793186	+	downstream	7014	5969	NearestLocation	OR2A12
chrX	68209768	68210168	401	*	4.31601	3.15433	4.95107	-1.47653	0.000502518	0.00339819	4636	ENSG00000090776	68048840	68061990	+	downstream	160928	147778	NearestLocation	EFNB1
chr9	134110730	134111130	401	*	4.92401	4.1529	5.42383	-1.14943	0.00050403	0.00340348	4589	ENSG00000226987	134116074	134117111	+	upstream	-5344	4944	NearestLocation	NA
chr14	104550865	104551265	401	*	4.54259	3.53086	5.13144	-1.36513	0.000509321	0.00343424	1481	ENSG00000166183	104552016	104579098	+	upstream	-1151	751	NearestLocation	ASPG
chr4	177502709	177503109	401	*	4.39807	3.28976	5.0174	-1.43655	0.000512111	0.00344806	3329	ENSG00000248480	177552543	177554382	-	downstream	51673	49434	NearestLocation	NA
chr1	64163878	64164278	401	*	4.71306	3.83008	5.2568	-1.25381	0.000513478	0.00344827	147	ENSG00000244256	64121414	64121716	+	downstream	42464	42162	NearestLocation	RN7SL130P
chr4	53739961	53740361	401	*	4.47199	3.41475	5.07555	-1.39919	0.00051362	0.00344827	3144	ENSG00000128045	53728457	53733000	+	downstream	11504	6961	NearestLocation	RASL11B
chr4	75858163	75858563	401	*	4.61879	3.63833	5.19718	-1.34056	0.000522155	0.00350054	3171	ENSG00000169116	75858305	75975325	+	overlapStart	-142	142	NearestLocation	PARM1
chr15	41556301	41556701	401	*	3.91978	2.41594	4.63996	-1.66656	0.000523818	0.00350665	1522	ENSG00000247556	41576188	41601901	+	upstream	-19887	19487	NearestLocation	OIP5-AS1
chr3	149336635	149337035	401	*	5.22338	4.58507	5.66437	-1.00065	0.000525559	0.00351327	3004	ENSG00000241985	149366784	149367971	-	downstream	31336	29749	NearestLocation	NA
chr12	19336014	19336414	401	*	3.58649	0.838111	4.47493	-1.9152	0.000530231	0.00353589	1001	ENSG00000240993	19329225	19329523	-	upstream	-6491	6491	NearestLocation	RN7SL459P
chr20	1915858	1916258	401	*	4.71366	3.82919	5.25796	-1.25335	0.000530459	0.00353589	2560	ENSG00000233896	1927892	1988163	+	upstream	-12034	11634	NearestLocation	PDYN-AS1
chr9	107755819	107756219	401	*	4.65827	3.73643	5.21621	-1.28756	0.000534074	0.00354984	4546	ENSG00000230013	107753077	107754062	-	upstream	-1757	1757	NearestLocation	CT70
chr9	126440804	126441204	401	*	4.65827	3.73643	5.21621	-1.28756	0.000534074	0.00354984	4575	ENSG00000230826	126498716	126514220	+	upstream	-57912	57512	NearestLocation	NA
chr5	148127084	148127484	401	*	3.68732	1.83098	4.47293	-1.79143	0.000535395	0.00355356	3589	ENSG00000164270	147830595	148056798	-	upstream	-70286	70286	NearestLocation	HTR4
chr5	78990467	78990867	401	*	3.90975	2.41594	4.62778	-1.65854	0.000537112	0.0035592	3469	ENSG00000164309	78985700	79096063	+	inside	4767	4767	NearestLocation	CMYA5
chr1	184987088	184987488	401	*	4.76396	3.91718	5.29401	-1.21961	0.000538061	0.0035592	347	ENSG00000201312	184984083	184984199	-	upstream	-2889	2889	NearestLocation	RNA5SP72
chr12	64798220	64798620	401	*	4.2163	3.00011	4.86668	-1.50859	0.000538533	0.0035592	1083	ENSG00000184575	64798130	64844907	+	inside	90	90	NearestLocation	XPOT
chr10	6406817	6407217	401	*	3.90679	2.41594	4.62417	-1.65776	0.000539657	0.00356159	485	ENSG00000212743	6392278	6394723	+	downstream	14539	12094	NearestLocation	NA
chrX	4970047	4970447	401	*	4.39384	3.28976	5.01189	-1.43313	0.000541291	0.00356732	4608	ENSG00000235039	5086959	5087480	-	downstream	117433	116512	NearestLocation	MTND6P12
chr6	73497335	73497735	401	*	4.86396	4.07777	5.36999	-1.15975	0.000544357	0.00358247	3769	ENSG00000233844	73340223	73388282	+	downstream	157112	109053	NearestLocation	NA
chr22	34001627	34002027	401	*	3.79762	2.15433	4.54597	-1.71909	0.000548919	0.0036074	2741	ENSG00000253007	34100772	34100906	-	downstream	99279	98745	NearestLocation	SNORA50B
chr1	14944264	14944664	401	*	4.31983	3.15147	4.95681	-1.47401	0.000554051	0.00363181	38	ENSG00000189337	14925200	15444539	+	inside	19064	19064	NearestLocation	KAZN
chr7	47366964	47367364	401	*	3.7951	2.14861	4.54406	-1.71823	0.000554189	0.00363181	4024	ENSG00000229192	47040218	47118726	-	upstream	-248238	248238	NearestLocation	NA
chr14	65858289	65858689	401	*	4.42416	4.96128	3.55886	1.23305	0.000556729	0.00364334	1420	ENSG00000033170	65877310	66210839	+	upstream	-19021	18621	NearestLocation	FUT8
chr4	100763493	100763893	401	*	3.79189	2.14861	4.54024	-1.71729	0.000558126	0.00364736	3213	ENSG00000070190	100737990	100791311	+	inside	25503	25503	NearestLocation	DAPP1
chr8	128748303	128748703	401	*	3.60507	1.41832	4.43724	-1.85715	0.000562546	0.0036711	4384	ENSG00000136997	128747680	128753674	+	inside	623	623	NearestLocation	MYC
chr1	237309585	237309985	401	*	4.81957	4.00249	5.33801	-1.18899	0.000565135	0.00368285	452	ENSG00000252396	237284107	237284409	+	downstream	25478	25176	NearestLocation	RN7SKP195
chr19	14184417	14184817	401	*	4.9137	4.15433	5.40862	-1.13199	0.000566852	0.00368889	2078	ENSG00000141854	14183348	14185874	+	inside	1069	1057	NearestLocation	MISP3
chr11	122604174	122604574	401	*	4.81968	4.00011	5.33911	-1.1892	0.000569091	0.0036983	932	ENSG00000239079	122596916	122597019	-	upstream	-7155	7155	NearestLocation	NA
chr12	133141123	133141523	401	*	4.29209	4.92012	3.1546	1.44654	0.000571257	0.00370721	1202	ENSG00000204583	133179736	133187037	-	downstream	45914	38213	NearestLocation	LRCOL1
chr4	72244826	72245226	401	*	3.90382	2.41594	4.62056	-1.6532	0.000574356	0.00372215	3165	ENSG00000270098	72300122	72303641	-	downstream	58815	54896	NearestLocation	NA
chr18	43409144	43409544	401	*	4.95912	4.22295	5.4442	-1.1059	0.000578243	0.00374214	2002	ENSG00000197046	43405477	43424045	+	inside	3667	3667	NearestLocation	SIGLEC15
chr8	98656771	98657171	401	*	5.37506	4.78586	5.79221	-0.93903	0.000580414	0.00375098	4331	ENSG00000147649	98656407	98740998	+	inside	364	364	NearestLocation	MTDH
chr7	75340919	75341319	401	*	4.46171	3.41713	5.06123	-1.38612	0.000585422	0.00377812	4053	ENSG00000127946	75162621	75368280	-	inside	27361	26961	NearestLocation	HIP1
chrX	149381091	149381491	401	*	4.11286	2.83276	4.78028	-1.54371	0.000589348	0.0037982	4657	ENSG00000252454	149396239	149396318	+	upstream	-15148	14748	NearestLocation	MIR2114
chr12	106300292	106300692	401	*	4.11506	2.83098	4.78352	-1.54376	0.000596528	0.00383509	1150	ENSG00000257773	106409675	106410784	+	upstream	-109383	108983	NearestLocation	NA
chr7	116589038	116589438	401	*	4.95973	4.225	5.4442	-1.10533	0.000596902	0.00383509	4113	ENSG00000004866	116593292	116870157	+	upstream	-4254	3854	NearestLocation	ST7;ST7-OT3
chr6	88978213	88978613	401	*	4.01792	2.63731	4.7103	-1.59578	0.000597538	0.00383509	3794	ENSG00000220131	88974877	88975230	+	downstream	3336	2983	NearestLocation	NA
chr14	95666822	95667222	401	*	4.22227	3.00011	4.87428	-1.50531	0.000600196	0.00384112	1470	ENSG00000258615	95665376	95665682	+	downstream	1446	1140	NearestLocation	NA
chr4	26485632	26486032	401	*	4.14235	2.83633	4.81641	-1.55902	0.000600808	0.00384112	3116	ENSG00000163394	26483022	26492084	-	inside	6452	2610	NearestLocation	CCKAR
chr3	65938874	65939274	401	*	5.40729	4.83098	5.81799	-0.92318	0.000601004	0.00384112	2884	ENSG00000272610	65858490	65940233	-	inside	1359	959	NearestLocation	MAGI1-IT1
chr21	40817492	40817892	401	*	5.40594	4.83008	5.81641	-0.922998	0.00060177	0.00384112	2682	ENSG00000185437	40817781	40887433	+	overlapStart	-289	111	NearestLocation	SH3BGR
chr3	37781003	37781403	401	*	4.20332	3.00011	4.85012	-1.49498	0.00060364	0.00384779	2836	ENSG00000235482	37789601	37790391	+	upstream	-8598	8198	NearestLocation	NA
chr6	149517204	149517604	401	*	4.20607	3.0017	4.8532	-1.49534	0.0006065	0.00385206	3911	ENSG00000263481	149497843	149497930	-	upstream	-19274	19274	NearestLocation	NA
chr7	53028706	53029106	401	*	5.00196	4.28911	5.47693	-1.08045	0.000606537	0.00385206	4035	ENSG00000223970	53070113	53071122	+	upstream	-41407	41007	NearestLocation	LOC392027
chr20	6015005	6015405	401	*	4.80638	4.00011	5.32053	-1.1778	0.000608896	0.00385206	2563	ENSG00000125872	6021424	6034695	-	downstream	19690	6019	NearestLocation	LRRN4
chr14	87542513	87542913	401	*	3.89368	2.41594	4.60821	-1.64277	0.000609667	0.00385206	1451	ENSG00000259061	87402984	87455469	+	downstream	139529	87044	NearestLocation	NA
chr12	115237411	115237811	401	*	5.13304	4.47397	5.58375	-1.02223	0.000609939	0.00385206	1173	ENSG00000257517	115206479	115209656	+	downstream	30932	27755	NearestLocation	NA
chr5	34468165	34468565	401	*	3.77491	2.15147	4.51945	-1.7037	0.000610775	0.00385206	3394	ENSG00000249380	34373133	34373955	+	downstream	95032	94210	NearestLocation	LOC100132524
chr3	53925706	53926106	401	*	3.77537	2.15433	4.51945	-1.70363	0.000611096	0.00385206	2868	ENSG00000113811	53918437	53926015	-	overlapStart	309	91	NearestLocation	SELENOK
chr5	14954756	14955156	401	*	3.5759	1.41832	4.40442	-1.84405	0.000611143	0.00385206	3382	ENSG00000250247	14960341	14961502	+	upstream	-5585	5185	NearestLocation	NA
chr8	37933874	37934274	401	*	3.91461	2.41832	4.63316	-1.65084	0.000611739	0.00385206	4247	ENSG00000260949	37920399	37921309	+	downstream	13475	12565	NearestLocation	NA
chr3	68755164	68755564	401	*	3.89111	2.41832	4.60456	-1.64179	0.000614016	0.00386069	2890	ENSG00000241506	68684856	68686175	+	downstream	70308	68989	NearestLocation	PSMC1P1
chr4	141075153	141075553	401	*	4.30406	3.15004	4.93691	-1.4603	0.000615131	0.00386069	3272	ENSG00000196782	140637907	141075338	-	overlapStart	185	185	NearestLocation	MAML3
chr4	187606045	187606445	401	*	4.7551	3.91718	5.28172	-1.20803	0.000615592	0.00386069	3353	ENSG00000083857	187508937	187647876	-	inside	41831	41431	NearestLocation	FAT1
chr2	120528903	120529303	401	*	3.69935	1.83098	4.48689	-1.77934	0.000619956	0.00388284	2357	ENSG00000088179	120517207	120741394	+	inside	11696	11696	NearestLocation	PTPN4
chr9	117757903	117758303	401	*	3.88875	2.41355	4.60273	-1.64066	0.000623223	0.00388908	4562	ENSG00000106952	117656003	117692697	-	upstream	-65206	65206	NearestLocation	TNFSF8
chr6	83931103	83931503	401	*	4.78112	3.91802	5.31741	-1.22771	0.000623308	0.00388908	3784	ENSG00000013375	83870869	83903655	-	upstream	-27448	27448	NearestLocation	PGM3
chr2	97968051	97968451	401	*	4.85514	4.07853	5.35724	-1.1484	0.000623452	0.00388908	2311	ENSG00000270187	97987331	97987617	-	downstream	19566	18880	NearestLocation	NA
chr10	97268583	97268983	401	*	5.25436	4.63782	5.68493	-0.972769	0.000624615	0.00389113	652	ENSG00000095637	97071528	97321171	-	inside	52588	52188	NearestLocation	SORBS1
chr6	122329515	122329915	401	*	5.25394	4.63833	5.68406	-0.9726	0.00062716	0.00390177	3850	ENSG00000220184	122179325	122179914	-	upstream	-149601	149601	NearestLocation	HMGB3P18
chr11	86711444	86711844	401	*	4.39172	3.28976	5.00913	-1.4263	0.000633645	0.00393687	875	ENSG00000254748	86735625	86736819	+	upstream	-24181	23781	NearestLocation	HNRNPCP8
chr6	125509733	125510133	401	*	3.77165	2.15147	4.51556	-1.69999	0.000637841	0.00395482	3854	ENSG00000111907	125440195	125585553	+	inside	69538	69538	NearestLocation	TPD52L1
chr15	70380763	70381163	401	*	3.77212	2.15433	4.51556	-1.69991	0.000638229	0.00395482	1589	ENSG00000207965	70371711	70371807	-	upstream	-8956	8956	NearestLocation	MIR629
chr10	23688817	23689217	401	*	5.04675	4.35609	5.51186	-1.05654	0.000645221	0.00399284	514	ENSG00000238515	23688460	23688528	-	upstream	-289	289	NearestLocation	NA
chr4	121722541	121722941	401	*	4.37326	3.29106	4.98462	-1.40984	0.000650265	0.00401689	3249	ENSG00000212359	121731624	121731724	+	upstream	-9083	8683	NearestLocation	RNU6-550P
chr3	29440025	29440425	401	*	4.66468	3.73739	5.22457	-1.28454	0.000651284	0.00401689	2815	ENSG00000226216	29432339	29432709	+	downstream	7686	7316	NearestLocation	RPS12P5
chr4	77299088	77299488	401	*	5.17126	4.53031	5.61349	-1.00131	0.000652001	0.00401689	3177	ENSG00000212368	77277763	77277868	-	upstream	-21220	21220	NearestLocation	RNU6-1000P
chr3	194299901	194300301	401	*	5.04232	4.35485	5.506	-1.05548	0.000653547	0.00401689	3080	ENSG00000231770	194304740	194310989	+	upstream	-4839	4439	NearestLocation	NA
chr1	148247474	148247874	401	*	4.09854	2.83098	4.76269	-1.53003	0.000655133	0.00401689	264	ENSG00000236140	148246959	148248104	-	inside	630	230	NearestLocation	NA
chr13	61547225	61547625	401	*	4.09854	2.83098	4.76269	-1.53003	0.000655133	0.00401689	1287	ENSG00000227510	61491176	61494141	+	downstream	56049	53084	NearestLocation	LINC01442
chr5	168552618	168553018	401	*	4.09854	2.83098	4.76269	-1.53003	0.000655133	0.00401689	3619	ENSG00000248222	168440232	168465003	+	downstream	112386	87615	NearestLocation	NA
chr9	85710728	85711128	401	*	5.32922	4.73834	5.7472	-0.945204	0.000658343	0.00403127	4498	ENSG00000165105	85594500	85678092	-	upstream	-32636	32636	NearestLocation	RASEF
chr1	232164951	232165351	401	*	3.55298	0.830976	4.43929	-1.88183	0.00066508	0.00406289	437	ENSG00000226758	232061580	232080979	+	downstream	103371	83972	NearestLocation	DISC1-IT1
chr11	116165328	116165728	401	*	3.88618	2.41594	4.59906	-1.63579	0.000665249	0.00406289	917	ENSG00000238625	116191061	116191162	+	upstream	-25733	25333	NearestLocation	NA
chr5	9515627	9516027	401	*	4.11763	2.83098	4.78674	-1.53864	0.000668218	0.00407569	3366	ENSG00000251370	9511445	9518198	+	inside	4182	2171	NearestLocation	SEMA5A-AS1
chr7	115994989	115995389	401	*	4.94829	4.22227	5.429	-1.09436	0.000670147	0.00408212	4111	ENSG00000216076	115985909	115985998	-	upstream	-8991	8991	NearestLocation	NA
chrX	18638444	18638844	401	*	3.55696	1.41355	4.38369	-1.82911	0.00067802	0.00412284	4617	ENSG00000102104	18658030	18690229	-	downstream	51785	19186	NearestLocation	RS1
chr2	133205930	133206330	401	*	3.65358	1.83455	4.43312	-1.75938	0.000678598	0.00412284	2374	ENSG00000183840	133174147	133404132	+	inside	31783	31783	NearestLocation	GPR39
chr12	50412783	50413183	401	*	5.40027	4.83008	5.80786	-0.914597	0.000680298	0.00412729	1053	ENSG00000161800	50370706	50426919	-	inside	14136	13736	NearestLocation	RACGAP1
chr7	18027935	18028335	401	*	3.64776	1.83098	4.42693	-1.75853	0.000681616	0.00412729	3979	ENSG00000265876	18033058	18033123	-	downstream	5188	4723	NearestLocation	NA
chr3	124519237	124519637	401	*	3.65484	1.83098	4.43518	-1.75912	0.000681984	0.00412729	2969	ENSG00000244286	124500002	124506604	+	downstream	19235	12633	NearestLocation	NA
chr2	198861917	198862317	401	*	3.75772	2.15433	4.49835	-1.68773	0.000688229	0.00415969	2476	ENSG00000115896	198669426	199437305	+	inside	192491	192491	NearestLocation	PLCL1
chr4	71553912	71554312	401	*	4.10113	2.83098	4.76597	-1.52806	0.000689214	0.00416025	3164	ENSG00000132467	71554196	71556267	+	overlapStart	-284	116	NearestLocation	UTP3
chr16	86229646	86230046	401	*	4.00341	2.63935	4.69183	-1.57917	0.000693372	0.00417994	1756	ENSG00000269186	86229787	86233326	+	overlapStart	-141	141	NearestLocation	LINC01082
chr13	108870557	108870957	401	*	3.76054	2.15147	4.50228	-1.68708	0.000697998	0.0042024	1333	ENSG00000174405	108859787	108870716	-	overlapStart	159	159	NearestLocation	LIG4
chr4	79473615	79474015	401	*	3.99367	2.63935	4.67973	-1.57649	0.000700673	0.00421307	3179	ENSG00000138772	79472673	79531597	+	inside	942	942	NearestLocation	ANXA3
chr13	111065042	111065442	401	*	4.84859	4.07928	5.34765	-1.1377	0.000708965	0.00425744	1341	ENSG00000238629	111066552	111066653	+	upstream	-1510	1110	NearestLocation	NA
chr18	71303630	71304030	401	*	3.98234	2.63731	4.66613	-1.56854	0.000709968	0.00425798	2035	ENSG00000265380	71378564	71382725	-	downstream	79095	74534	NearestLocation	NA
chr3	73304833	73305233	401	*	4.63989	3.7393	5.19013	-1.26262	0.000711556	0.00426017	2909	ENSG00000252937	73290940	73291047	-	upstream	-13786	13786	NearestLocation	RNU6-1270P
chr5	140344031	140344431	401	*	3.75655	2.15719	4.49638	-1.68487	0.000712158	0.00426017	3575	ENSG00000243232	140345820	140391936	+	upstream	-1789	1389	NearestLocation	PCDHAC2
chr6	128878238	128878638	401	*	4.39066	3.28976	5.00775	-1.42109	0.000714325	0.00426766	3862	ENSG00000213130	128901258	128902029	-	downstream	23791	22620	NearestLocation	EEF1DP5
chr2	16587778	16588178	401	*	4.27674	3.1529	4.90073	-1.43566	0.000717328	0.00427569	2186	ENSG00000224400	16535524	16613970	+	inside	52254	25792	NearestLocation	NA
chr5	125379802	125380202	401	*	4.30952	3.15433	4.94271	-1.45503	0.000717503	0.00427569	3542	ENSG00000241888	125302470	125303778	-	upstream	-76024	76024	NearestLocation	NA
chr14	86038364	86038764	401	*	4.18865	2.99851	4.8318	-1.47787	0.000723352	0.00430505	1450	ENSG00000185070	85996488	86095034	+	inside	41876	41876	NearestLocation	FLRT2
chr1	156736809	156737209	401	*	4.37571	3.29236	4.98742	-1.40632	0.000724853	0.00430849	289	ENSG00000143321	156711899	156736717	-	upstream	-92	92	NearestLocation	HDGF
chr20	6102643	6103043	401	*	3.86984	2.41594	4.5791	-1.62197	0.00073102	0.00433962	2564	ENSG00000101311	6055492	6104191	-	inside	1548	1148	NearestLocation	FERMT1
chr12	65718809	65719209	401	*	4.08314	2.83098	4.74322	-1.51494	0.000741266	0.00439485	1084	ENSG00000250280	65675437	65680508	+	downstream	43372	38301	NearestLocation	NA
chr10	69455264	69455664	401	*	4.89746	4.15362	5.38582	-1.11013	0.000744419	0.00440794	587	ENSG00000183230	67672276	69455927	-	inside	663	263	NearestLocation	CTNNA3
chr13	44389297	44389697	401	*	5.12317	4.47455	5.56902	-1.0108	0.000746236	0.0044131	1257	ENSG00000270522	44361727	44361988	+	downstream	27570	27309	NearestLocation	NA
chr2	86341519	86341919	401	*	4.08182	2.83098	4.74156	-1.51418	0.000747929	0.00441751	2302	ENSG00000132300	86333305	86369280	+	inside	8214	8214	NearestLocation	PTCD3
chr14	55239871	55240271	401	*	3.63206	1.83098	4.40862	-1.7437	0.000756673	0.00445941	1402	ENSG00000252019	55325933	55326048	+	upstream	-86062	85662	NearestLocation	RNU6ATAC9P
chr18	53156466	53156866	401	*	3.63026	1.83098	4.40652	-1.74351	0.000756934	0.00445941	2016	ENSG00000267402	53159406	53163623	+	upstream	-2940	2540	NearestLocation	NA
chr1	163172705	163173105	401	*	4.36271	3.29106	4.97078	-1.39569	0.000758072	0.00446049	300	ENSG00000225755	163207004	163208987	+	upstream	-34299	33899	NearestLocation	NA
chr8	108759441	108759841	401	*	3.63385	1.83098	4.41071	-1.74296	0.000764141	0.00448769	4353	ENSG00000248838	108659507	108660260	+	downstream	99934	99181	NearestLocation	PGAM1P13
chr1	10853776	10854176	401	*	3.62847	1.83098	4.40442	-1.74242	0.000764619	0.00448769	27	ENSG00000130940	10696661	10856707	-	inside	2931	2531	NearestLocation	CASZ1
chr1	232691586	232691986	401	*	5.59144	5.07928	5.96865	-0.84122	0.000765877	0.00448942	438	ENSG00000116991	232533711	232697304	-	inside	5718	5318	NearestLocation	SIPA1L2
chr7	29685666	29686066	401	*	3.73938	2.15147	4.47693	-1.67139	0.000777905	0.00453897	3993	ENSG00000227855	29689843	29782210	+	upstream	-4177	3777	NearestLocation	DPY19L2P3
chr10	18479619	18480019	401	*	3.73985	2.15433	4.47693	-1.67132	0.000778272	0.00453897	501	ENSG00000165995	18429606	18830798	+	inside	50013	50013	NearestLocation	CACNB2
chr5	178157630	178158030	401	*	3.85836	2.41832	4.56451	-1.61062	0.000780136	0.00453897	3652	ENSG00000169131	178138593	178157703	-	overlapStart	73	73	NearestLocation	ZNF354A
chr8	23571973	23572373	401	*	4.51551	3.53197	5.09494	-1.3273	0.000780249	0.00453897	4230	ENSG00000253471	23564654	23647000	+	inside	7319	7319	NearestLocation	NA
chr2	46149714	46150114	401	*	4.27723	3.15004	4.90222	-1.43253	0.000780842	0.00453897	2246	ENSG00000233829	46231081	46231448	-	downstream	81734	80967	NearestLocation	NA
chr1	231957007	231957407	401	*	4.37755	3.29106	4.99023	-1.40419	0.000781886	0.00453897	435	ENSG00000226758	232061580	232080979	+	upstream	-104573	104173	NearestLocation	DISC1-IT1
chr4	164087893	164088293	401	*	5.49703	4.96128	5.88682	-0.871441	0.000782017	0.00453897	3312	ENSG00000145414	164031225	164088073	-	overlapStart	180	180	NearestLocation	NAF1
chr6	150498321	150498721	401	*	4.57253	3.63731	5.13524	-1.28785	0.00078234	0.00453897	3913	ENSG00000238594	150485720	150485822	+	downstream	12601	12499	NearestLocation	NA
chr15	67142303	67142703	401	*	4.57307	3.63935	5.13524	-1.28765	0.000784765	0.00453897	1578	ENSG00000270490	67100742	67102898	+	downstream	41561	39405	NearestLocation	LETM1P1
chr4	31090487	31090887	401	*	4.35884	3.28846	4.96652	-1.39344	0.00078495	0.00453897	3125	ENSG00000251182	31172766	31213297	+	upstream	-82279	81879	NearestLocation	NA
chr3	50138474	50138874	401	*	4.08088	2.83276	4.7399	-1.5113	0.000785029	0.00453897	2863	ENSG00000003756	50126341	50156454	+	inside	12133	12133	NearestLocation	RBM5
chr12	4429901	4430301	401	*	4.98519	4.29041	5.45215	-1.05901	0.000789981	0.00456195	976	ENSG00000078237	4430371	4462338	+	upstream	-470	70	NearestLocation	TIGAR
chr1	115124220	115124620	401	*	4.53882	3.53416	5.12534	-1.34436	0.000791434	0.00456469	229	ENSG00000116752	115110178	115124260	-	overlapStart	40	40	NearestLocation	BCAS2
chr3	157827681	157828081	401	*	3.85441	2.41355	4.56075	-1.609	0.000794561	0.0045718	3025	ENSG00000168779	157814948	157824292	-	upstream	-3389	3389	NearestLocation	SHOX2
chr3	176820290	176820690	401	*	3.86099	2.41594	4.56827	-1.6099	0.000794964	0.0045718	3041	ENSG00000201343	176838479	176838588	-	downstream	18298	17789	NearestLocation	NA
chr12	56435759	56436159	401	*	4.17454	3.00011	4.81325	-1.46446	0.000795607	0.0045718	1067	ENSG00000197728	56435637	56438116	+	inside	122	122	NearestLocation	RPS26
chr9	116217564	116217964	401	*	4.62906	3.73834	5.17568	-1.25049	0.0008003	0.00458447	4558	ENSG00000138835	116207011	116360018	+	inside	10553	10553	NearestLocation	RGS3
chr20	47311790	47312190	401	*	4.68383	3.83098	5.21621	-1.21642	0.000800759	0.00458447	2630	ENSG00000251876	47355867	47355985	-	downstream	44195	43677	NearestLocation	NA
chr22	20651359	20651759	401	*	4.68383	3.83098	5.21621	-1.21642	0.000800759	0.00458447	2713	ENSG00000227005	20644408	20645991	+	downstream	6951	5368	NearestLocation	NA
chr11	10879485	10879885	401	*	4.5712	3.63935	5.13271	-1.28636	0.000801762	0.00458459	745	ENSG00000247271	10879806	10928349	+	overlapStart	-321	79	NearestLocation	ZBED5-AS1
chr11	2324806	2325206	401	*	3.85331	2.41594	4.55886	-1.60755	0.000808415	0.00461697	726	ENSG00000110665	2316875	2324279	-	upstream	-527	527	NearestLocation	C11orf21
chr9	9536524	9536924	401	*	5.42512	4.87472	5.82256	-0.890717	0.000815931	0.0046542	4428	ENSG00000265735	9442060	9442347	+	downstream	94464	94177	NearestLocation	NA
chr15	99995025	99995425	401	*	5.35526	4.7854	5.76269	-0.913015	0.000823564	0.004692	1636	ENSG00000068305	100017370	100256671	+	upstream	-22345	21945	NearestLocation	MEF2A
chr9	74357181	74357581	401	*	4.50174	3.53086	5.07686	-1.31576	0.000826519	0.00470128	4490	ENSG00000271166	74419199	74419742	+	upstream	-62018	61618	NearestLocation	LOC100420790
chr9	546644	547044	401	*	4.62855	3.73643	5.17568	-1.24969	0.000827207	0.00470128	4412	ENSG00000226403	547317	549531	+	upstream	-673	273	NearestLocation	NA
chr14	70826312	70826712	401	*	3.97031	2.63935	4.65063	-1.55116	0.000838089	0.00475402	1430	ENSG00000133983	70791798	70826448	-	overlapStart	136	136	NearestLocation	COX16
chr18	52473252	52473652	401	*	5.03136	4.3536	5.49065	-1.03614	0.000838526	0.00475402	2013	ENSG00000267524	52411981	52412812	+	downstream	61271	60440	NearestLocation	RPSAP57
chr22	45559011	45559411	401	*	4.06889	2.83098	4.72517	-1.49982	0.00084122	0.00476247	2772	ENSG00000226328	45528901	45559662	-	inside	651	251	NearestLocation	NUP50-DT
chrX	144924850	144925250	401	*	3.86208	2.41355	4.57014	-1.60639	0.000842058	0.00476247	4656	ENSG00000221870	144908928	144911368	+	downstream	15922	13482	NearestLocation	NA
chr4	103790021	103790421	401	*	4.63266	3.73834	5.1806	-1.2502	0.000847448	0.00478716	3221	ENSG00000109332	103715540	103790053	-	overlapStart	32	32	NearestLocation	UBE2D3
chr12	89720503	89720903	401	*	4.70735	3.83098	5.24863	-1.23856	0.000852413	0.00480471	1116	ENSG00000257820	89713141	89713426	+	downstream	7362	7077	NearestLocation	NA
chr14	93509829	93510229	401	*	4.74053	3.91718	5.26145	-1.18436	0.000852615	0.00480471	1463	ENSG00000258730	93533797	93538497	+	upstream	-23968	23568	NearestLocation	ITPK1-AS1
chr7	35505553	35505953	401	*	6.5149	6.18835	6.78101	-0.580802	0.000855663	0.00481607	4003	ENSG00000235464	35535631	35549873	-	downstream	44320	29678	NearestLocation	NA
chr14	35451478	35451878	401	*	4.06927	2.83276	4.72517	-1.4987	0.000858665	0.00482188	1380	ENSG00000258704	35390064	35451738	-	overlapStart	260	140	NearestLocation	NA
chr18	72764373	72764773	401	*	3.51555	1.41355	4.33691	-1.79504	0.000860431	0.00482188	2039	ENSG00000180011	72907063	72921303	-	downstream	156930	142290	NearestLocation	ZADH2
chr3	113153553	113153953	401	*	3.51555	1.41355	4.33691	-1.79504	0.000860431	0.00482188	2955	ENSG00000206530	113005777	113160457	-	inside	6904	6504	NearestLocation	CFAP44
chr7	132204766	132205166	401	*	3.61255	1.83098	4.38582	-1.72612	0.000860828	0.00482188	4135	ENSG00000221866	131808091	132333447	-	inside	128681	128281	NearestLocation	PLXNA4
chr6	114063527	114063927	401	*	6.53103	6.2061	6.79606	-0.577171	0.000863697	0.00483215	3837	ENSG00000221559	114026035	114026125	+	downstream	37492	37402	NearestLocation	NA
chr13	60520994	60521394	401	*	4.35667	3.28846	4.96367	-1.3889	0.000864773	0.00483237	1282	ENSG00000227528	60586885	60618491	+	upstream	-65891	65491	NearestLocation	DIAPH3-AS1
chr16	49315385	49315785	401	*	4.44222	3.41475	5.03623	-1.356	0.000876769	0.00489225	1687	ENSG00000102924	49311828	49315742	-	overlapStart	357	43	NearestLocation	CBLN1
chr6	47015171	47015571	401	*	3.50971	1.41355	4.33029	-1.79244	0.000877585	0.00489225	3739	ENSG00000153292	46965440	47010099	-	upstream	-5072	5072	NearestLocation	ADGRF1
chr5	168930897	168931297	401	*	4.50244	3.52976	5.07818	-1.31413	0.000879953	0.0048996	3622	ENSG00000206614	168979453	168979559	+	upstream	-48556	48156	NearestLocation	RNU6-477P
chr12	76411880	76412280	401	*	4.49879	3.53086	5.0729	-1.31263	0.000881266	0.00490106	1101	ENSG00000257453	76424274	76425158	+	upstream	-12394	11994	NearestLocation	NA
chr12	120524733	120525133	401	*	3.72007	2.15433	4.45316	-1.65427	0.000882988	0.00490479	1185	ENSG00000255575	120494839	120494984	+	downstream	29894	29749	NearestLocation	NA
chr8	18976679	18977079	401	*	3.83771	2.41355	4.54024	-1.59357	0.000889688	0.0049344	4220	ENSG00000254242	18949243	18972534	+	downstream	27436	4145	NearestLocation	LOC105379301
chr19	58397365	58397765	401	*	4.16153	3.0017	4.79606	-1.4504	0.000890435	0.0049344	2154	ENSG00000204514	58360099	58400442	-	inside	3077	2677	NearestLocation	ZNF814
chr13	76579484	76579884	401	*	3.71839	2.15433	4.45113	-1.65329	0.00089185	0.00493638	1295	ENSG00000224933	76587159	76588637	-	downstream	9153	7275	NearestLocation	NA
chr10	87777975	87778375	401	*	3.72296	2.15147	4.45722	-1.65373	0.000894104	0.004943	625	ENSG00000200487	87812205	87812323	+	upstream	-34230	33830	NearestLocation	RNA5SP322
chr20	36619232	36619632	401	*	4.56294	3.63935	5.12151	-1.27459	0.00090735	0.00500118	2613	ENSG00000199683	36603558	36603883	-	upstream	-15349	15349	NearestLocation	RN7SKP185
chr7	72176016	72176416	401	*	4.25291	3.1529	4.86972	-1.40851	0.000907502	0.00500118	4049	ENSG00000270694	72187850	72188054	+	upstream	-11834	11434	NearestLocation	NA
chr2	223911807	223912207	401	*	3.95059	2.63935	4.62597	-1.53724	0.000907844	0.00500118	2527	ENSG00000152049	223916532	224063117	+	upstream	-4725	4325	NearestLocation	KCNE4
chr2	74302819	74303219	401	*	3.95203	2.63935	4.62778	-1.53723	0.000912192	0.00501921	2289	ENSG00000257800	74347807	74350345	+	upstream	-44988	44588	NearestLocation	NA
chr3	90060414	90060814	401	*	4.72864	3.91886	5.24418	-1.17273	0.000915965	0.00503403	2928	ENSG00000212598	90079434	90079644	+	upstream	-19020	18620	NearestLocation	NA
chr11	133389488	133389888	401	*	4.15993	3.00011	4.79446	-1.44853	0.000921123	0.00505642	952	ENSG00000183715	132284871	133402414	-	inside	12926	12526	NearestLocation	OPCML
chr18	5983408	5983808	401	*	5.20158	4.58666	5.63137	-0.963415	0.000922268	0.00505676	1944	ENSG00000265487	5956100	5960784	+	downstream	27308	22624	NearestLocation	NA
chr2	110812605	110813005	401	*	5.92457	5.50382	6.24992	-0.717653	0.00092612	0.00507192	2341	ENSG00000265682	110827538	110827619	-	downstream	15014	14533	NearestLocation	MIR4267
chr11	9573386	9573786	401	*	4.49011	3.53086	5.06123	-1.30232	0.000943498	0.00516103	739	ENSG00000166483	9595228	9615004	+	upstream	-21842	21442	NearestLocation	WEE1
chr11	112753402	112753802	401	*	4.33665	3.28976	4.93691	-1.36883	0.000948335	0.00518113	911	ENSG00000149294	112831997	113149158	+	upstream	-78595	78195	NearestLocation	NCAM1
chr5	88172462	88172862	401	*	3.83459	2.41355	4.53642	-1.58866	0.000949393	0.00518113	3483	ENSG00000248309	88179145	88762215	+	upstream	-6683	6283	NearestLocation	MEF2C-AS1
chr7	154861779	154862179	401	*	4.83059	4.07777	5.32275	-1.11438	0.000952069	0.00518622	4172	ENSG00000157219	154862034	154877459	+	overlapStart	-255	145	NearestLocation	HTR5A
chr7	123321055	123321455	401	*	5.15448	4.53142	5.58819	-0.979559	0.000952549	0.00518622	4122	ENSG00000170807	123295861	123304344	+	downstream	25194	16711	NearestLocation	LMOD2
chr6	5126440	5126840	401	*	4.05451	2.83098	4.7069	-1.48435	0.00095796	0.00520961	3660	ENSG00000265083	5148467	5148556	-	downstream	22116	21627	NearestLocation	MIR3691
chr11	84613403	84613803	401	*	4.42316	3.41594	5.01052	-1.34104	0.000961154	0.00522076	870	ENSG00000255555	84647733	84666749	+	upstream	-34330	33930	NearestLocation	NA
chr7	5397606	5398006	401	*	5.15201	4.53307	5.58375	-0.972283	0.00096225	0.00522076	3965	ENSG00000241269	5459458	5460398	+	upstream	-61852	61452	NearestLocation	NA
chr20	16366544	16366944	401	*	3.49101	1.41832	4.30845	-1.77749	0.000969395	0.00525342	2582	ENSG00000221448	16390942	16391036	-	downstream	24492	23998	NearestLocation	NA
chr1	165379223	165379623	401	*	5.06356	4.41594	5.50894	-1.00343	0.000976113	0.00528369	307	ENSG00000143171	165370159	165414433	-	inside	35210	9064	NearestLocation	RXRG
chr19	18391121	18391521	401	*	3.48903	1.41832	4.30621	-1.77596	0.000981227	0.00530522	2087	ENSG00000130522	18390563	18392432	-	inside	1311	558	NearestLocation	JUND
chr4	63377965	63378365	401	*	3.82283	2.41594	4.52139	-1.57887	0.00098574	0.00531793	3156	ENSG00000248336	63376187	63376489	+	downstream	1778	1476	NearestLocation	NA
chr10	60144952	60145352	401	*	4.05049	2.83098	4.70178	-1.48193	0.000985857	0.00531793	573	ENSG00000108064	60144782	60158981	+	inside	170	170	NearestLocation	TFAM
chr17	12433392	12433792	401	*	3.83348	2.41594	4.5345	-1.58539	0.000991008	0.00533954	1809	ENSG00000179136	12453099	12546171	+	upstream	-19707	19307	NearestLocation	LINC00670
chr3	172594825	172595225	401	*	3.48988	1.40877	4.30845	-1.77459	0.000994076	0.0053499	3038	ENSG00000237501	172548771	172549019	-	upstream	-45806	45806	NearestLocation	NA
chr2	26924854	26925254	401	*	4.35285	3.28976	4.95824	-1.37715	0.000995994	0.00535404	2201	ENSG00000171303	26915619	26956288	+	inside	9235	9235	NearestLocation	KCNK3
chr5	127811403	127811803	401	*	4.41296	3.41594	4.99693	-1.33119	0.00100131	0.00537215	3548	ENSG00000113396	127873706	128369335	+	upstream	-62303	61903	NearestLocation	SLC27A6
chr10	114706094	114706494	401	*	4.0501	2.82919	4.70178	-1.48097	0.00100459	0.00537215	695	ENSG00000148737	114710009	114927437	+	upstream	-3915	3515	NearestLocation	TCF7L2
chr1	198136783	198137183	401	*	3.81968	2.41594	4.51751	-1.57706	0.00100544	0.00537215	362	ENSG00000151414	198126093	198291550	+	inside	10690	10690	NearestLocation	NEK7
chr4	87881692	87882092	401	*	3.70002	2.15433	4.429	-1.63663	0.00100663	0.00537215	3194	ENSG00000235043	87870818	87871276	-	upstream	-10416	10416	NearestLocation	NA
chr5	114796147	114796547	401	*	3.70002	2.15433	4.429	-1.63663	0.00100663	0.00537215	3522	ENSG00000249944	114825331	114825628	+	upstream	-29184	28784	NearestLocation	LOC112267949
chr20	13127734	13128134	401	*	4.41683	3.41475	5.00249	-1.33245	0.00100708	0.00537215	2573	ENSG00000271426	13054315	13054960	-	upstream	-72774	72774	NearestLocation	NA
chr2	218469186	218469586	401	*	3.70295	2.15147	4.43312	-1.637	0.00100742	0.00537215	2507	ENSG00000224414	218558618	218561486	+	upstream	-89432	89032	NearestLocation	LOC100533848
chr16	14093815	14094215	401	*	5.1053	4.47569	5.54216	-0.982622	0.00102409	0.00544565	1661	ENSG00000262097	14103137	14109873	-	downstream	16058	8922	NearestLocation	NA
chr9	97758066	97758466	401	*	4.23908	3.1529	4.85166	-1.39407	0.00102448	0.00544565	4530	ENSG00000224764	97690833	97697228	-	upstream	-60838	60838	NearestLocation	NA
chr10	35442728	35443128	401	*	5.57785	5.07966	5.94747	-0.824782	0.00102495	0.00544565	538	ENSG00000233343	35447234	35447568	+	upstream	-4506	4106	NearestLocation	ATP6V1G1P4
chr9	71912328	71912728	401	*	4.92758	4.22431	5.39832	-1.06195	0.00102587	0.00544565	4485	ENSG00000135063	71939488	72007371	+	upstream	-27160	26760	NearestLocation	FAM189A2
chr18	57183504	57183904	401	*	5.22854	4.63833	5.64619	-0.935764	0.0010292	0.00545709	2025	ENSG00000267061	57230941	57235847	+	upstream	-47437	47037	NearestLocation	NA
chr22	24541839	24542239	401	*	3.93601	2.63731	4.60821	-1.52112	0.00103825	0.00549258	2720	ENSG00000099994	24577227	24585078	+	upstream	-35388	34988	NearestLocation	SUSD2
chr3	77370914	77371314	401	*	3.93601	2.63731	4.60821	-1.52112	0.00103825	0.00549258	2916	ENSG00000213450	77365903	77366749	-	upstream	-4165	4165	NearestLocation	NA
chr9	131320771	131321171	401	*	4.42212	3.41594	5.00913	-1.33735	0.0010498	0.00554318	4584	ENSG00000197694	131314866	131395941	+	inside	5905	5905	NearestLocation	SPTAN1
chr1	245817972	245818372	401	*	5.34223	4.78494	5.74322	-0.895367	0.00105019	0.00554318	466	ENSG00000231612	245837034	245839780	-	downstream	21808	18662	NearestLocation	NA
chr12	12595110	12595510	401	*	4.04953	2.83276	4.70006	-1.47784	0.00105633	0.00556931	988	ENSG00000271370	12605037	12605415	-	downstream	10305	9527	NearestLocation	NA
chr4	95254391	95254791	401	*	3.70685	2.15433	4.43724	-1.63343	0.00105952	0.00557982	3203	ENSG00000163106	95219686	95264027	-	inside	9636	9236	NearestLocation	HPGDS
chr5	148941491	148941891	401	*	3.583	1.82739	4.3518	-1.69955	0.0010644	0.0055992	3594	ENSG00000183111	148931510	149014531	+	inside	9981	9981	NearestLocation	ARHGEF37
chr2	177450459	177450859	401	*	3.93746	2.63731	4.61003	-1.5198	0.00106694	0.00560184	2436	ENSG00000272551	177476165	177476977	-	downstream	26518	25306	NearestLocation	NA
chr6	12149906	12150306	401	*	5.01473	4.35423	5.4661	-1.01512	0.0010673	0.00560184	3671	ENSG00000078401	12290596	12297427	+	upstream	-140690	140290	NearestLocation	EDN1
chr12	12276213	12276613	401	*	4.14553	3.0017	4.77542	-1.43197	0.00107459	0.00563373	987	ENSG00000198134	12264097	12264423	+	downstream	12116	11790	NearestLocation	NA
chr1	186181557	186181957	401	*	3.93684	2.64139	4.60821	-1.51886	0.00107698	0.00563558	352	ENSG00000224691	186145946	186146434	-	upstream	-35123	35123	NearestLocation	NA
chr10	88444140	88444540	401	*	4.66414	3.83098	5.18891	-1.19093	0.00107878	0.00563558	630	LRG_385	88428321	88495825	+	inside	15819	15819	NearestLocation	NA
chr12	34175141	34175541	401	*	4.03863	2.83098	4.68665	-1.46895	0.00107936	0.00563558	1029	ENSG00000139133	34175216	34182629	+	overlapStart	-75	75	NearestLocation	ALG10
chr8	102300240	102300640	401	*	5.14344	4.53142	5.57182	-0.96245	0.0010817	0.00563558	4345	ENSG00000253282	102299673	102306011	+	inside	567	567	NearestLocation	NA
chr16	21532954	21533354	401	*	5.41888	4.87559	5.81262	-0.874522	0.00108199	0.00563558	1668	ENSG00000180747	21458004	21531765	-	upstream	-1189	1189	NearestLocation	SMG1P3
chr4	87856059	87856459	401	*	4.32471	3.28976	4.92114	-1.35469	0.00108282	0.00563558	3193	ENSG00000172493	87856154	88062206	+	overlapStart	-95	95	NearestLocation	AFF1
chr16	30709331	30709731	401	*	3.9306	2.63935	4.6009	-1.51742	0.00108339	0.00563558	1681	ENSG00000080603	30709530	30755602	+	overlapStart	-199	199	NearestLocation	SRCAP
chr8	121386132	121386532	401	*	5.14802	4.53197	5.57836	-0.963175	0.00109763	0.00569743	4369	ENSG00000172167	121457640	121554373	+	upstream	-71508	71108	NearestLocation	MTBP
chr1	203614032	203614432	401	*	4.03824	2.82919	4.68665	-1.46811	0.00109773	0.00569743	378	ENSG00000236035	203626097	203626888	-	downstream	12856	11665	NearestLocation	NA
chr4	30746856	30747256	401	*	4.03688	2.82919	4.68493	-1.46772	0.00109953	0.00570044	3123	ENSG00000169851	30722037	31148422	+	inside	24819	24819	NearestLocation	PCDH7
chr3	156504923	156505323	401	*	4.87058	4.1529	5.34765	-1.07626	0.00110411	0.00571786	3018	ENSG00000230457	156527340	156528521	-	downstream	23598	22017	NearestLocation	NA
chr2	101854362	101854762	401	*	4.87134	4.1529	5.34875	-1.07633	0.00111268	0.00575585	2323	ENSG00000158435	101869264	101886778	+	upstream	-14902	14502	NearestLocation	CNOT11
chr12	19728700	19729100	401	*	3.56711	1.83098	4.3325	-1.68956	0.00111726	0.00576038	1002	ENSG00000240328	19661838	19662179	+	downstream	66862	66521	NearestLocation	NA
chr20	50157833	50158233	401	*	3.56711	1.83098	4.3325	-1.68956	0.00111726	0.00576038	2635	ENSG00000101096	50003494	50179370	-	inside	21537	21137	NearestLocation	NFATC2
chr4	96562741	96563141	401	*	3.56711	1.83098	4.3325	-1.68956	0.00111726	0.00576038	3207	ENSG00000242936	96566103	96566444	-	downstream	3703	2962	NearestLocation	RPL30P6
chr17	35876415	35876815	401	*	3.80416	2.41594	4.49835	-1.56194	0.00111853	0.00576057	1848	ENSG00000161326	35849937	35873603	+	downstream	26478	2812	NearestLocation	NA
chr9	140024093	140024493	401	*	4.40299	3.41713	4.98321	-1.31853	0.00111984	0.00576094	4605	ENSG00000238824	140017961	140018060	-	upstream	-6033	6033	NearestLocation	NA
chr10	112396690	112397090	401	*	4.13533	3.00011	4.76269	-1.42181	0.00112678	0.00579026	688	ENSG00000263919	112393589	112393883	-	upstream	-2807	2807	NearestLocation	NA
chr5	76788069	76788469	401	*	4.04133	2.83098	4.69011	-1.46716	0.00112968	0.00579531	3466	ENSG00000244019	76841222	76842091	+	upstream	-53153	52753	NearestLocation	RPS2P24
chr2	190028584	190028984	401	*	4.40509	3.41713	4.98602	-1.31889	0.00113052	0.00579531	2454	ENSG00000204262	189896622	190044605	-	inside	16021	15621	NearestLocation	COL5A2
chr17	74722346	74722746	401	*	3.57273	1.83098	4.33911	-1.68886	0.00113149	0.00579531	1920	ENSG00000070495	74708919	74722866	-	inside	520	120	NearestLocation	JMJD6
chr16	64533110	64533510	401	*	3.8053	2.41355	4.50031	-1.56132	0.00113332	0.00579833	1716	ENSG00000259846	64398684	64634150	+	inside	134426	100640	NearestLocation	NA
chr7	69562683	69563083	401	*	3.80621	2.41832	4.50031	-1.56114	0.00113499	0.00580048	4045	ENSG00000158321	69063905	70258054	+	inside	498778	498778	NearestLocation	AUTS2
chr11	100932349	100932749	401	*	3.68265	2.15147	4.40862	-1.61967	0.00114084	0.00582405	897	ENSG00000082175	100900355	101001255	-	inside	68906	31994	NearestLocation	PGR
chr7	35755990	35756390	401	*	3.94296	2.63731	4.61694	-1.52167	0.00114496	0.00583869	4004	ENSG00000227544	35754644	35774497	+	inside	1346	1346	NearestLocation	LOC100506725
chr11	33280091	33280491	401	*	4.1328	3.00011	4.75941	-1.4203	0.00114736	0.00584451	787	ENSG00000110422	33278218	33378569	+	inside	1873	1873	NearestLocation	HIPK3
chr3	137762080	137762480	401	*	4.04094	2.82919	4.69011	-1.46616	0.00115252	0.00585844	2987	ENSG00000272609	137723491	137723964	-	upstream	-38116	38116	NearestLocation	NA
chr1	92351422	92351822	401	*	3.67968	2.15433	4.40442	-1.61837	0.00115337	0.00585844	202	ENSG00000069702	92145902	92371892	-	inside	20470	20070	NearestLocation	TGFBR3
chr11	84659238	84659638	401	*	3.68439	2.15147	4.41071	-1.61898	0.00115386	0.00585844	871	ENSG00000255555	84647733	84666749	+	inside	11505	7111	NearestLocation	NA
chr12	69878300	69878700	401	*	4.86786	4.15147	5.34437	-1.07486	0.0011555	0.00586041	1089	ENSG00000166225	69864129	69973562	+	inside	14171	14171	NearestLocation	FRS2
chr4	57379664	57380064	401	*	4.71617	3.91886	5.2267	-1.15693	0.00117261	0.00594072	3149	ENSG00000196503	57371509	57390614	+	inside	8155	8155	NearestLocation	ARL9
chr15	36654613	36655013	401	*	4.13153	3.00011	4.75777	-1.41825	0.00118896	0.00601704	1512	ENSG00000259395	36633940	36636367	+	downstream	20673	18246	NearestLocation	NA
chr15	37339404	37339804	401	*	4.22664	3.15433	4.83492	-1.37847	0.00119068	0.00601919	1515	ENSG00000206676	37343029	37343131	-	downstream	3727	3225	NearestLocation	NA
chr19	48395193	48395593	401	*	4.5422	3.63833	5.09364	-1.2486	0.00119406	0.00602977	2132	ENSG00000105398	48373723	48389654	-	upstream	-5539	5539	NearestLocation	SULT2A1
chr3	35995933	35996333	401	*	3.79938	2.41594	4.49243	-1.55631	0.00120084	0.00605745	2831	ENSG00000226489	35913358	35913690	+	downstream	82575	82243	NearestLocation	RPL36AP17
chr3	129158974	129159374	401	*	3.91434	2.63731	4.58096	-1.50262	0.00120236	0.00605852	2979	ENSG00000163913	129158968	129239198	+	inside	6	6	NearestLocation	IFT122
chr3	116033270	116033670	401	*	3.91665	2.64139	4.58282	-1.50225	0.00121341	0.00610764	2956	ENSG00000240922	116078871	116088937	+	upstream	-45601	45201	NearestLocation	LSAMP-AS1
chr4	65219702	65220102	401	*	5.13744	4.53197	5.56263	-0.952845	0.00121722	0.00611591	3159	ENSG00000252104	65263412	65263505	-	downstream	43803	43310	NearestLocation	RNU6-191P
chr12	1752215	1752615	401	*	4.31187	3.29106	4.90371	-1.3406	0.00121768	0.00611591	962	ENSG00000266043	1769481	1769546	-	downstream	17331	16866	NearestLocation	MIR3649
chr17	27994994	27995394	401	*	4.7614	4.0009	5.2568	-1.11842	0.00123048	0.00617357	1837	ENSG00000265625	27971814	27972865	-	upstream	-22129	22129	NearestLocation	NA
chr16	73398898	73399298	401	*	4.7236	3.91886	5.23712	-1.16374	0.00123197	0.00617442	1733	ENSG00000258779	73420704	73455292	+	upstream	-21806	21406	NearestLocation	LINC01568
chr18	22865956	22866356	401	*	4.40719	3.41713	4.98883	-1.31632	0.00123699	0.006189	1969	ENSG00000264434	22882090	22882920	+	upstream	-16134	15734	NearestLocation	NA
chr3	128336542	128336942	401	*	5.1406	4.53197	5.56733	-0.953296	0.00123753	0.006189	2976	ENSG00000198685	128290843	128294929	-	upstream	-41613	41613	NearestLocation	LINC01565
chr8	9160706	9161106	401	*	5.3697	4.83098	5.76105	-0.871434	0.00124192	0.0062043	4198	ENSG00000207415	9144982	9145088	-	upstream	-15618	15618	NearestLocation	RNU6-1151P
chr15	35997987	35998387	401	*	4.02296	2.83276	4.66613	-1.45209	0.00124453	0.00621068	1510	ENSG00000259217	36067001	36067190	+	upstream	-69014	68614	NearestLocation	NA
chr3	192294996	192295396	401	*	3.38729	0.830976	4.25913	-1.78453	0.00125028	0.00623269	3070	ENSG00000238902	192251798	192251901	-	upstream	-43095	43095	NearestLocation	NA
chr6	157101472	157101872	401	*	4.24194	3.15004	4.85627	-1.38636	0.00125599	0.00625448	3923	ENSG00000270487	157101461	157101589	-	overlapStart	117	11	NearestLocation	NA
chr2	132013891	132014291	401	*	4.76082	4.0017	5.25564	-1.11756	0.00126292	0.00627948	2373	ENSG00000212199	131987180	131987286	+	downstream	26711	26605	NearestLocation	RNU6-127P
chr2	163823493	163823893	401	*	4.81349	4.08003	5.29741	-1.09068	0.0012637	0.00627948	2413	ENSG00000184611	163227917	163695240	-	upstream	-128253	128253	NearestLocation	KCNH7
chr18	19600436	19600836	401	*	4.01983	2.83098	4.66262	-1.45063	0.00126564	0.00628242	1965	ENSG00000265568	19579530	19579612	+	downstream	20906	20824	NearestLocation	NA
chr4	79685531	79685931	401	*	3.5486	1.83098	4.3107	-1.67171	0.00126814	0.00628815	3182	ENSG00000239793	79689653	79689904	+	upstream	-4122	3722	NearestLocation	NA
chr1	226552270	226552670	401	*	4.02491	2.82919	4.66963	-1.45136	0.00127875	0.00633402	426	ENSG00000143799	226548392	226595780	-	inside	43510	3878	NearestLocation	PARP1
chr1	101669707	101670107	401	*	4.86311	4.1529	5.33691	-1.06479	0.00128585	0.00635811	218	ENSG00000271578	101656076	101656550	+	downstream	13631	13157	NearestLocation	NA
chr2	172855902	172856302	401	*	3.5448	1.83098	4.30621	-1.66999	0.00128634	0.00635811	2430	ENSG00000172878	172864490	172947158	+	upstream	-8588	8188	NearestLocation	METAP1D
chr13	24144186	24144586	401	*	4.11904	3.00011	4.74156	-1.40557	0.00129051	0.00637199	1210	ENSG00000127863	24144509	24250232	+	overlapStart	-323	77	NearestLocation	TNFRSF19
chr8	17532379	17532779	401	*	3.78364	2.41594	4.47293	-1.54312	0.0012959	0.00639185	4216	ENSG00000265520	17539087	17539166	-	downstream	6787	6308	NearestLocation	MIR548V
chr14	104143138	104143538	401	*	3.66207	2.15147	4.38369	-1.6017	0.00129883	0.00639952	1479	ENSG00000246451	104148699	104150352	-	downstream	7214	5161	NearestLocation	NA
chr17	63694669	63695069	401	*	3.79009	2.41594	4.48092	-1.5436	0.00130512	0.00642372	1906	ENSG00000270870	63651032	63651513	+	downstream	43637	43156	NearestLocation	NA
chr8	63199466	63199866	401	*	3.78318	2.41355	4.47293	-1.54235	0.00131105	0.00644609	4285	ENSG00000185942	63161150	63912211	+	inside	38316	38316	NearestLocation	NKAIN3
chr9	137692710	137693110	401	*	3.7841	2.41832	4.47293	-1.54217	0.00131297	0.00644873	4601	ENSG00000264877	137740819	137740966	-	downstream	48256	47709	NearestLocation	NA
chr15	80412972	80413372	401	*	5.10284	4.47569	5.53852	-0.972107	0.00131763	0.00646482	1614	ENSG00000251881	80434400	80434469	+	upstream	-21428	21028	NearestLocation	NA
chr5	121866902	121867302	401	*	5.6553	5.18765	6.00789	-0.777742	0.00132597	0.0064934	3531	ENSG00000250328	121772192	121814782	-	upstream	-52120	52120	NearestLocation	MGC32805
chr12	32992696	32993096	401	*	5.09062	4.47569	5.52042	-0.962317	0.00132623	0.0064934	1024	ENSG00000244743	33016052	33016367	+	upstream	-23356	22956	NearestLocation	NA
chr15	62798653	62799053	401	*	3.90278	2.63731	4.56639	-1.48863	0.00132957	0.00649608	1560	ENSG00000171914	62682725	63136830	+	inside	115928	115928	NearestLocation	TLN2
chr2	38604275	38604675	401	*	3.90278	2.63731	4.56639	-1.48863	0.00132957	0.00649608	2231	ENSG00000119787	38522022	38604427	-	overlapStart	152	152	NearestLocation	ATL2
chr1	162337601	162338001	401	*	3.66132	2.15719	4.38156	-1.59911	0.00133662	0.0065237	299	ENSG00000239887	162336698	162356600	+	inside	903	903	NearestLocation	C1orf226
chr10	22233615	22234015	401	*	3.78433	2.41116	4.47493	-1.54102	0.00134174	0.00654185	511	ENSG00000201364	22222072	22222367	+	downstream	11543	11248	NearestLocation	RN7SKP37
chr11	29795231	29795631	401	*	4.46484	3.53197	5.02671	-1.27096	0.0013523	0.00657609	778	ENSG00000240554	29747311	29748112	+	downstream	47920	47119	NearestLocation	RPL7AP58
chr12	93733472	93733872	401	*	4.46484	3.53197	5.02671	-1.27096	0.0013523	0.00657609	1131	ENSG00000239073	93744392	93744492	+	upstream	-10920	10520	NearestLocation	NA
chr12	69809506	69809906	401	*	4.22205	3.15004	4.83024	-1.37192	0.00135325	0.00657609	1088	ENSG00000241765	69816436	69816775	+	upstream	-6930	6530	NearestLocation	RPS26P45
chr3	85008032	85008432	401	*	4.46613	3.53307	5.02807	-1.2712	0.0013544	0.00657609	2925	ENSG00000175161	85008132	86123579	+	overlapStart	-100	100	NearestLocation	CADM2
chr1	246607922	246608322	401	*	4.02452	2.82739	4.66963	-1.4478	0.0013674	0.00663033	470	ENSG00000207326	246589308	246589421	-	upstream	-18501	18501	NearestLocation	NA
chr2	198317801	198318201	401	*	5.71001	5.25741	6.05401	-0.758077	0.00136883	0.00663033	2472	ENSG00000115520	198318147	198340032	+	overlapStart	-346	54	NearestLocation	COQ10B
chr15	35600864	35601264	401	*	3.65729	2.15433	4.37728	-1.59671	0.00136983	0.00663033	1509	ENSG00000259585	35590450	35591641	-	upstream	-9223	9223	NearestLocation	NA
chr4	103634153	103634553	401	*	4.12452	3.0017	4.7482	-1.40353	0.00138178	0.00668125	3220	ENSG00000248971	103649903	103651328	-	downstream	17175	15350	NearestLocation	KRT8P46
chr20	19907253	19907653	401	*	4.53185	3.63833	5.0795	-1.23489	0.00139135	0.00671907	2590	ENSG00000132669	19867165	19983101	+	inside	40088	40088	NearestLocation	RIN2
chr12	50262842	50263242	401	*	4.81496	4.07702	5.3008	-1.08964	0.00139249	0.00671907	1052	ENSG00000242041	50256956	50257286	+	downstream	5886	5556	NearestLocation	NA
chr1	52344513	52344913	401	*	3.36415	0.830976	4.23382	-1.76732	0.00139469	0.00672277	126	ENSG00000078618	52254863	52344477	-	upstream	-36	36	NearestLocation	NRDC
chr2	216483755	216484155	401	*	4.00909	2.83098	4.64885	-1.43695	0.00140308	0.00675034	2503	ENSG00000227981	216444130	216447358	-	upstream	-36397	36397	NearestLocation	NA
chr1	143743623	143744023	401	*	4.45565	3.53086	5.01465	-1.2615	0.00140331	0.00675034	245	ENSG00000223804	143647638	143745417	-	inside	1794	1394	NearestLocation	NA
chr4	77229638	77230038	401	*	4.00593	2.82919	4.6453	-1.43612	0.00141015	0.00677627	3176	ENSG00000249858	77265703	77266743	+	upstream	-36065	35665	NearestLocation	SNX5P1
chr13	109077383	109077783	401	*	3.42485	1.41355	4.23382	-1.7222	0.00141194	0.00677789	1334	ENSG00000232087	109132574	109134165	+	upstream	-55191	54791	NearestLocation	HCFC2P1
chr14	104283354	104283754	401	*	4.58759	3.73739	5.11895	-1.19839	0.00141673	0.00679388	1480	ENSG00000202275	104263609	104263685	-	upstream	-19669	19669	NearestLocation	NA
chr18	11125624	11126024	401	*	4.2086	3.1529	4.81167	-1.36024	0.00142118	0.00680822	1956	ENSG00000154864	10666480	11148587	-	inside	22963	22563	NearestLocation	PIEZO2
chr11	133396668	133397068	401	*	4.64507	3.83098	5.16233	-1.16576	0.00142337	0.00681175	953	ENSG00000183715	132284871	133402414	-	inside	5746	5346	NearestLocation	OPCML
chr18	13660447	13660847	401	*	3.42692	1.41355	4.23618	-1.72041	0.00143448	0.00684733	1961	ENSG00000266606	13665114	13665165	+	upstream	-4667	4267	NearestLocation	NA
chr9	116382793	116383193	401	*	4.80287	4.07853	5.28286	-1.07873	0.001435	0.00684733	4560	ENSG00000233817	116381508	116384914	+	inside	1285	1285	NearestLocation	NA
chr7	149112143	149112543	401	*	4.80469	4.07928	5.28514	-1.07915	0.00143521	0.00684733	4161	ENSG00000261842	149119766	149121981	+	upstream	-7623	7223	NearestLocation	NA
chr7	87158121	87158521	401	*	4.75146	4.00011	5.24301	-1.10571	0.00144133	0.00686761	4069	ENSG00000231956	87150777	87151726	+	downstream	7344	6395	NearestLocation	NA
chr5	24481513	24481913	401	*	3.76772	2.41594	4.45316	-1.52742	0.0014452	0.00686761	3389	ENSG00000251294	24554127	24613331	+	upstream	-72614	72214	NearestLocation	NA
chr8	74406120	74406520	401	*	3.76772	2.41594	4.45316	-1.52742	0.0014452	0.00686761	4296	ENSG00000254273	74423511	74423889	-	downstream	17769	16991	NearestLocation	NA
chr6	26987620	26988020	401	*	4.01047	2.83098	4.65063	-1.43566	0.00144535	0.00686761	3704	ENSG00000238621	26988114	26988226	+	upstream	-494	94	NearestLocation	NA
chr6	125622722	125623122	401	*	3.526	1.83098	4.284	-1.65261	0.0014495	0.00687195	3855	ENSG00000111906	125541108	125623282	-	inside	560	160	NearestLocation	HDDC2
chr12	119810296	119810696	401	*	6.26494	5.91781	6.54454	-0.604841	0.00145132	0.00687195	1181	ENSG00000183273	119772517	119978852	+	inside	37779	37779	NearestLocation	CCDC60
chr1	85690772	85691172	401	*	4.29908	3.28846	4.88757	-1.32453	0.00145181	0.00687195	188	ENSG00000097096	85622556	85666729	-	upstream	-24043	24043	NearestLocation	SYDE2
chr2	26235326	26235726	401	*	4.29779	3.29236	4.88456	-1.32361	0.00145215	0.00687195	2200	ENSG00000268412	26251074	26251481	-	downstream	16155	15348	NearestLocation	NA
chr1	31538158	31538558	401	*	4.46383	3.53197	5.02534	-1.26798	0.00145542	0.0068789	84	ENSG00000134644	31404353	31538838	-	inside	680	280	NearestLocation	PUM1
chr14	97207718	97208118	401	*	5.62379	5.15255	5.97842	-0.780765	0.00145657	0.0068789	1473	ENSG00000258979	97207528	97256950	+	inside	190	190	NearestLocation	LINC02299
chr13	87535140	87535540	401	*	4.30626	3.29106	4.89626	-1.33136	0.00145861	0.00688157	1305	ENSG00000233528	87564173	87589271	+	upstream	-29033	28633	NearestLocation	NA
chr20	1481075	1481475	401	*	3.89533	2.63731	4.55697	-1.48141	0.00146116	0.00688473	2557	ENSG00000196209	1451386	1472233	-	upstream	-8842	8842	NearestLocation	SIRPB2
chr4	101992258	101992658	401	*	3.76819	2.41832	4.45316	-1.52657	0.00146223	0.00688473	3214	ENSG00000164035	101316498	101801283	-	upstream	-190975	190975	NearestLocation	EMCN
chr2	159976065	159976465	401	*	5.39726	4.87429	5.78028	-0.848612	0.00146971	0.00691024	2403	ENSG00000226878	159912606	159913371	-	upstream	-62694	62694	NearestLocation	NA
chr12	24897370	24897770	401	*	4.45725	3.53307	5.01603	-1.26011	0.00147061	0.00691024	1010	ENSG00000240481	24859722	24860015	+	downstream	37648	37355	NearestLocation	RN7SL38P
chr1	154885223	154885623	401	*	3.52848	1.83455	4.28628	-1.65118	0.00147309	0.00691494	284	ENSG00000163344	154897210	154909467	-	downstream	24244	11587	NearestLocation	PMVK
chr1	25694669	25695069	401	*	4.37796	3.41713	4.94963	-1.28955	0.00147657	0.00692429	64	ENSG00000238889	25672765	25672868	-	upstream	-21801	21801	NearestLocation	NA
chr8	101964226	101964626	401	*	4.1081	3.0017	4.72686	-1.39033	0.00147958	0.00693145	4342	ENSG00000164924	101928753	101965616	-	inside	1390	990	NearestLocation	YWHAZ
chr3	81839261	81839661	401	*	4.10422	3.0017	4.72181	-1.38916	0.00148523	0.00693849	2924	ENSG00000242190	81811857	81813907	-	upstream	-25354	25354	NearestLocation	NA
chr6	53729196	53729596	401	*	3.64297	2.15147	4.36049	-1.58331	0.00148572	0.00693849	3747	ENSG00000271218	53783772	53785586	-	downstream	56390	54176	NearestLocation	NA
chr19	17246319	17246719	401	*	3.64348	2.15433	4.36049	-1.58327	0.00148591	0.00693849	2085	ENSG00000268056	17263398	17278861	-	downstream	32542	16679	NearestLocation	NA
chr2	213210686	213211086	401	*	4.85098	4.1529	5.31941	-1.05207	0.00148703	0.00693849	2494	ENSG00000221782	213290987	213291084	-	downstream	80398	79901	NearestLocation	MIR548F2
chr10	121427385	121427785	401	*	3.88362	2.63731	4.54216	-1.47218	0.00149208	0.00695455	705	ENSG00000232823	121442639	121443335	-	downstream	15950	14854	NearestLocation	NA
chr1	231983469	231983869	401	*	3.88405	2.63935	4.54216	-1.47208	0.00149345	0.00695455	436	ENSG00000226758	232061580	232080979	+	upstream	-78111	77711	NearestLocation	DISC1-IT1
chr4	119918906	119919306	401	*	3.88513	2.63731	4.54406	-1.47227	0.00149661	0.0069623	3243	ENSG00000249002	119927187	119927556	+	upstream	-8281	7881	NearestLocation	NA
chr13	28233526	28233926	401	*	4.6511	3.83098	5.17075	-1.17197	0.00149936	0.0069633	1217	ENSG00000226703	28270530	28271341	-	downstream	37815	36604	NearestLocation	NA
chr8	48551104	48551504	401	*	3.64475	2.15147	4.36265	-1.58267	0.00150137	0.0069633	4261	ENSG00000207369	48580333	48580439	+	upstream	-29229	28829	NearestLocation	RNU6-665P
chr9	12973070	12973470	401	*	3.64525	2.15433	4.36265	-1.58261	0.00150192	0.0069633	4432	ENSG00000214121	12972842	12973437	-	overlapStart	367	33	NearestLocation	NA
chr5	56712000	56712400	401	*	3.6394	2.15147	4.35615	-1.58192	0.00150378	0.0069633	3432	ENSG00000250308	56718291	56720218	+	upstream	-6291	5891	NearestLocation	SALL4P1
chr8	28419338	28419738	401	*	3.63991	2.15433	4.35615	-1.58186	0.00150429	0.0069633	4234	ENSG00000202411	28387928	28388036	+	downstream	31410	31302	NearestLocation	RNA5SP259
chr12	115141915	115142315	401	*	4.19833	3.15433	4.79766	-1.34847	0.00152671	0.00705153	1172	ENSG00000257817	115151616	115205762	+	upstream	-9701	9301	NearestLocation	NA
chr8	17924986	17925386	401	*	4.19954	3.15433	4.79926	-1.34879	0.00152734	0.00705153	4218	ENSG00000245281	17942377	17953903	+	upstream	-17391	16991	NearestLocation	LOC101929066
chr6	106511929	106512329	401	*	4.80162	4.07702	5.28172	-1.07726	0.00152788	0.00705153	3818	ENSG00000057657	106534195	106557814	+	upstream	-22266	21866	NearestLocation	PRDM1
chr10	3616604	3617004	401	*	3.88319	2.63526	4.54216	-1.47054	0.0015339	0.00707229	478	ENSG00000236892	3574286	3579223	-	upstream	-37381	37381	NearestLocation	NA
chr6	117002057	117002457	401	*	4.10736	2.99851	4.72686	-1.3885	0.00153977	0.00709239	3844	ENSG00000196911	117002350	117063029	+	overlapStart	-293	107	NearestLocation	KPNA5
chr19	2540720	2541120	401	*	3.76282	2.41594	4.44706	-1.52166	0.00155214	0.00714229	2044	ENSG00000105694	2538108	2538786	+	downstream	2612	1934	NearestLocation	NA
chr22	46127266	46127666	401	*	3.33623	0.830976	4.20323	-1.74959	0.0015589	0.00716632	2775	ENSG00000264160	46156404	46156478	+	upstream	-29138	28738	NearestLocation	MIR4762
chr20	9093751	9094151	401	*	5.73093	5.29073	6.06774	-0.741471	0.00156145	0.00717098	2568	ENSG00000101333	9049410	9461889	+	inside	44341	44341	NearestLocation	PLCB4
chr20	49990444	49990844	401	*	3.8862	2.63526	4.54597	-1.4697	0.00156952	0.00720097	2632	ENSG00000263645	49993772	49993858	-	downstream	3414	2928	NearestLocation	NA
chr1	214450983	214451383	401	*	5.52645	5.03985	5.88967	-0.805083	0.00157288	0.00720927	406	ENSG00000143499	214454445	214510474	+	upstream	-3462	3062	NearestLocation	SMYD2
chr2	21932872	21933272	401	*	4.9495	4.29041	5.40021	-1.01191	0.00157767	0.0072224	2195	ENSG00000229621	21910306	21933495	-	inside	623	223	NearestLocation	LINC01822
chr8	109203067	109203467	401	*	3.33403	0.830976	4.20081	-1.74738	0.00158109	0.0072224	4354	ENSG00000253754	109238429	109239773	+	upstream	-35362	34962	NearestLocation	NA
chr11	43760416	43760816	401	*	4.28406	3.29106	4.86668	-1.31064	0.00158169	0.0072224	798	ENSG00000254512	43755309	43756114	+	downstream	5107	4302	NearestLocation	NA
chr13	21421537	21421937	401	*	5.24655	4.69019	5.64708	-0.890501	0.00158193	0.0072224	1205	ENSG00000132953	21351469	21477187	-	inside	55650	55250	NearestLocation	XPO4
chr10	102046227	102046627	401	*	3.34282	0.830976	4.21046	-1.7461	0.00159494	0.00727277	663	ENSG00000196072	102033713	102046469	-	overlapStart	242	158	NearestLocation	BLOC1S2
chr1	214204784	214205184	401	*	3.9917	2.83276	4.62597	-1.42011	0.00159608	0.00727277	404	ENSG00000272167	214202236	214204109	-	upstream	-675	675	NearestLocation	NA
chr20	46130569	46130969	401	*	3.40021	1.41355	4.20564	-1.70299	0.00160333	0.00729294	2625	ENSG00000124151	46130601	46285621	+	overlapStart	-32	32	NearestLocation	NCOA3
chr1	68152378	68152778	401	*	5.83305	5.41594	6.15623	-0.707961	0.00160363	0.00729294	157	ENSG00000116717	68150744	68154021	+	inside	1634	1243	NearestLocation	GADD45A
chr19	6216957	6217357	401	*	4.36606	3.41594	4.934	-1.27724	0.00160856	0.00730188	2058	ENSG00000267427	6210390	6212492	-	upstream	-4465	4465	NearestLocation	NA
chrX	22766791	22767191	401	*	3.3981	1.41355	4.20323	-1.70246	0.00160873	0.00730188	4623	ENSG00000237019	22716574	22787083	+	inside	50217	19892	NearestLocation	NA
chr6	109621460	109621860	401	*	4.11031	3.00011	4.73021	-1.38686	0.0016126	0.00731236	3824	ENSG00000201023	109626697	109626798	+	upstream	-5237	4837	NearestLocation	RNY3P11
chr5	167921112	167921512	401	*	4.30279	3.28976	4.89207	-1.32118	0.00161647	0.00731944	3617	ENSG00000113643	167913450	167946304	+	inside	7662	7662	NearestLocation	RARS1
chr3	177063443	177063843	401	*	4.30481	3.28976	4.89476	-1.32657	0.0016173	0.00731944	3043	ENSG00000226782	177055416	177066954	-	inside	3511	3111	NearestLocation	NA
chr18	53415705	53416105	401	*	4.5251	3.63833	5.07026	-1.22739	0.00162215	0.00733425	2017	ENSG00000267284	53388294	53455992	+	inside	27411	27411	NearestLocation	NA
chr4	160150278	160150678	401	*	5.90222	5.50326	6.21442	-0.685355	0.00162556	0.00734256	3308	ENSG00000216089	160216866	160216935	+	upstream	-66588	66188	NearestLocation	NA
chr13	77770329	77770729	401	*	5.95114	5.55903	6.25913	-0.671674	0.00163116	0.0073536	1299	ENSG00000229521	77654646	77655325	-	upstream	-115004	115004	NearestLocation	NA
chr2	100545161	100545561	401	*	4.41003	3.41594	4.99302	-1.30696	0.00163153	0.0073536	2321	ENSG00000230393	100721381	100723966	+	upstream	-176220	175820	NearestLocation	NA
chr22	19868633	19869033	401	*	4.28552	3.29236	4.8682	-1.30961	0.00163273	0.0073536	2709	ENSG00000232926	19874812	19875493	+	upstream	-6179	5779	NearestLocation	RPL8P5
chr3	61711435	61711835	401	*	5.03386	4.41594	5.4651	-0.961818	0.00164022	0.00738018	2881	ENSG00000252420	61724801	61724903	-	downstream	13468	12966	NearestLocation	NA
chr1	179851376	179851776	401	*	3.74998	2.41594	4.43106	-1.50986	0.00164475	0.00738654	336	ENSG00000272906	179850742	179851730	-	overlapStart	354	46	NearestLocation	NA
chr3	64892344	64892744	401	*	4.79527	4.07928	5.27162	-1.06706	0.00164493	0.00738654	2883	ENSG00000163638	64501333	64673676	-	upstream	-218668	218668	NearestLocation	ADAMTS9
chr15	27939816	27940216	401	*	4.6516	3.83276	5.17075	-1.16914	0.00164751	0.00738654	1492	ENSG00000258853	27929644	27930914	-	upstream	-8902	8902	NearestLocation	NA
chr3	111904444	111904844	401	*	4.47316	3.53307	5.03759	-1.26685	0.00165077	0.00738654	2952	ENSG00000244144	111904327	111904845	-	inside	401	1	NearestLocation	NA
chr15	45492630	45493030	401	*	4.28829	3.28976	4.87276	-1.31037	0.00165086	0.00738654	1533	ENSG00000260035	45492523	45492830	-	overlapStart	200	107	NearestLocation	NA
chr7	36429845	36430245	401	*	3.74832	2.41594	4.429	-1.50929	0.0016527	0.00738654	4006	ENSG00000164542	36363830	36429734	-	upstream	-111	111	NearestLocation	KIAA0895
chr5	67559810	67560210	401	*	4.0915	3.0017	4.70519	-1.37493	0.00165271	0.00738654	3450	ENSG00000145675	67511548	67597649	+	inside	48262	37439	NearestLocation	PIK3R1
chr11	33182873	33183273	401	*	4.68935	3.91886	5.18891	-1.12177	0.00166131	0.00741789	786	ENSG00000247151	33183203	33213144	+	overlapStart	-330	70	NearestLocation	CSTF3-DT
chr11	112655106	112655506	401	*	4.0928	3.0017	4.7069	-1.37493	0.00166355	0.00742075	910	ENSG00000254626	112658027	112666577	+	upstream	-2921	2521	NearestLocation	NA
chr10	44806485	44806885	401	*	3.74785	2.41355	4.429	-1.5086	0.00166981	0.00744157	551	ENSG00000229116	44787706	44789157	-	upstream	-17328	17328	NearestLocation	NA
chr2	106054824	106055224	401	*	4.745	4.00011	5.23382	-1.09408	0.001673	0.00744866	2325	ENSG00000115641	105974169	106054970	-	overlapStart	146	146	NearestLocation	FHL2
chr3	78098667	78099067	401	*	3.50555	1.83455	4.25913	-1.63185	0.00168311	0.00748654	2917	ENSG00000244461	78087856	78095945	-	upstream	-2722	2722	NearestLocation	NA
chr6	26104054	26104454	401	*	3.75328	2.41594	4.43518	-1.50858	0.00168686	0.00749382	3699	ENSG00000197061	26104104	26104518	+	overlapStart	-50	50	NearestLocation	H4C3
chr7	139024946	139025346	401	*	3.50107	1.83098	4.25447	-1.63113	0.00168958	0.00749382	4151	ENSG00000146963	139025105	139108198	+	overlapStart	-159	159	NearestLocation	LUC7L2
chr10	105480188	105480588	401	*	4.37036	3.41594	4.93981	-1.27679	0.00169117	0.00749382	675	ENSG00000222503	105432916	105433023	+	downstream	47272	47165	NearestLocation	NA
chr10	130397797	130398197	401	*	4.37036	3.41594	4.93981	-1.27679	0.00169117	0.00749382	717	ENSG00000234640	130114546	130118478	-	upstream	-279319	279319	NearestLocation	NA
chr14	94556748	94557148	401	*	3.86573	2.63731	4.51945	-1.4549	0.00169953	0.00749493	1467	ENSG00000165948	94547628	94570192	+	inside	9120	9120	NearestLocation	IFI27L1
chr5	81703885	81704285	401	*	3.62232	2.15433	4.33471	-1.56444	0.00169961	0.00749493	3477	ENSG00000205464	81575281	81682796	+	downstream	128604	21089	NearestLocation	ATP6AP1L
chr6	34724853	34725253	401	*	3.62232	2.15433	4.33471	-1.56444	0.00169961	0.00749493	3715	ENSG00000124562	34725183	34741571	+	overlapStart	-330	70	NearestLocation	SNRPC
chr2	131260897	131261297	401	*	4.36467	3.41475	4.93254	-1.27483	0.0017	0.00749493	2369	ENSG00000251973	131255316	131255422	-	upstream	-5475	5475	NearestLocation	RNU6-473P
chr13	39300202	39300602	401	*	3.86617	2.63935	4.51945	-1.4548	0.00170106	0.00749493	1241	ENSG00000150893	39261266	39460074	+	inside	38936	38936	NearestLocation	FREM2
chr16	29866902	29867302	401	*	3.86617	2.63935	4.51945	-1.4548	0.00170106	0.00749493	1677	ENSG00000214725	29874914	29879371	+	upstream	-8012	7612	NearestLocation	CDIPTOSP
chr10	69335278	69335678	401	*	3.62361	2.15147	4.33691	-1.56432	0.00170712	0.00750715	586	ENSG00000183230	67672276	69455927	-	inside	120649	120249	NearestLocation	CTNNA3
chr17	12155672	12156072	401	*	3.99589	2.83276	4.63137	-1.41734	0.00170804	0.00750715	1808	ENSG00000265400	12104917	12118584	+	downstream	50755	37088	NearestLocation	NA
chr18	61549913	61550313	401	*	3.75375	2.41832	4.43518	-1.50758	0.00170997	0.00750715	2030	ENSG00000197632	61538926	61571124	+	inside	10987	10987	NearestLocation	SERPINB2
chr10	71087640	71088040	401	*	3.86921	2.63935	4.52332	-1.45501	0.00171027	0.00750715	590	ENSG00000229197	71060188	71060573	-	upstream	-27067	27067	NearestLocation	RPS15AP28
chr2	218154591	218154991	401	*	5.4969	5.0009	5.86531	-0.810124	0.00171508	0.00752122	2505	ENSG00000233143	218147462	218200843	+	inside	7129	7129	NearestLocation	NA
chr17	79367626	79368026	401	*	6.61693	6.32283	6.8611	-0.524444	0.00172353	0.00755115	1930	ENSG00000263053	79369275	79375658	+	upstream	-1649	1249	NearestLocation	NA
chr11	78651687	78652087	401	*	4.37006	3.41475	4.93981	-1.27596	0.00173193	0.00757014	857	ENSG00000266550	78684766	78684854	-	downstream	33167	32679	NearestLocation	NA
chr3	11550555	11550955	401	*	3.62541	2.15147	4.33911	-1.56319	0.00173532	0.00757014	2795	ENSG00000270531	11570962	11571229	-	downstream	20674	20007	NearestLocation	NA
chr5	34743881	34744281	401	*	3.62541	2.15147	4.33911	-1.56319	0.00173532	0.00757014	3396	ENSG00000250234	34656517	34657355	-	upstream	-86526	86526	NearestLocation	NA
chr6	43141830	43142230	401	*	4.84308	4.15433	5.30733	-1.03998	0.00173995	0.00757014	3733	ENSG00000112658	43139037	43149243	+	inside	2793	2793	NearestLocation	SRF
chr21	40816607	40817007	401	*	4.84672	4.15362	5.31294	-1.04113	0.00174083	0.00757014	2681	ENSG00000157578	40777770	40817731	-	inside	1124	724	NearestLocation	LCA5L
chr9	35696486	35696886	401	*	3.31225	0.830976	4.17691	-1.73186	0.00174109	0.00757014	4454	ENSG00000198467	35681989	35691017	-	upstream	-5469	5469	NearestLocation	TPM2
chr16	85045144	85045544	401	*	3.61818	2.15147	4.33029	-1.56203	0.00174137	0.00757014	1752	ENSG00000153786	85007787	85045141	-	upstream	-3	3	NearestLocation	ZDHHC7
chr18	70480154	70480554	401	*	3.6187	2.15433	4.33029	-1.56197	0.00174193	0.00757014	2034	ENSG00000263750	70520556	70520617	-	downstream	40463	40002	NearestLocation	MIR548AV
chr4	186732958	186733358	401	*	4.18396	3.15433	4.77866	-1.33286	0.00174246	0.00757014	3348	ENSG00000207497	186631027	186631121	-	upstream	-101837	101837	NearestLocation	NA
chr9	71650499	71650899	401	*	3.87074	2.63935	4.52526	-1.45384	0.00175116	0.00759961	4481	ENSG00000165060	71650175	71715094	+	inside	324	324	NearestLocation	FXN
chr10	122857861	122858261	401	*	3.99489	2.83455	4.62957	-1.41552	0.0017525	0.00759961	709	ENSG00000236762	122892604	122893237	-	downstream	35376	34343	NearestLocation	NA
chr6	91387978	91388378	401	*	4.44321	3.53307	4.99693	-1.24376	0.00175467	0.00760194	3802	ENSG00000135341	91223292	91296764	-	upstream	-91214	91214	NearestLocation	MAP3K7
chr13	33700374	33700774	401	*	3.86834	2.63526	4.52332	-1.45342	0.00175739	0.00760666	1235	ENSG00000230300	33732724	33738546	-	downstream	38172	31950	NearestLocation	NA
chr2	196477506	196477906	401	*	4.58155	3.73834	5.11022	-1.18418	0.00176771	0.00764422	2468	ENSG00000213107	196447518	196448755	-	upstream	-28751	28751	NearestLocation	AHCYP5
chr1	246038209	246038609	401	*	3.62721	2.15147	4.34131	-1.56085	0.00179006	0.00773374	468	ENSG00000235096	246196853	246198905	+	upstream	-158644	158244	NearestLocation	NA
chr7	69521289	69521689	401	*	4.50926	3.63935	5.04811	-1.20775	0.00180106	0.00777324	4044	ENSG00000158321	69063905	70258054	+	inside	457384	457384	NearestLocation	AUTS2
chr10	62060282	62060682	401	*	3.97571	2.82919	4.60639	-1.40416	0.00180474	0.00777324	575	ENSG00000202190	61841499	61841612	+	downstream	218783	218670	NearestLocation	NA
chr17	8750011	8750411	401	*	5.11453	4.53086	5.52892	-0.922341	0.00180484	0.00777324	1802	ENSG00000174083	8706041	8770994	-	inside	20983	20583	NearestLocation	NA
chr12	57782208	57782608	401	*	3.31608	0.823805	4.18182	-1.72616	0.00180587	0.00777324	1072	ENSG00000201198	57809079	57809186	+	upstream	-26871	26471	NearestLocation	RNU6-879P
chr12	123717797	123718197	401	*	3.9743	2.82919	4.60456	-1.4037	0.00180991	0.00778346	1196	ENSG00000130921	123717463	123742506	+	inside	334	334	NearestLocation	C12orf65
chr6	80247121	80247521	401	*	3.97329	2.83098	4.60273	-1.40318	0.00181537	0.00779975	3778	ENSG00000135338	80194708	80247175	-	overlapStart	54	54	NearestLocation	LCA5
chr1	201278546	201278946	401	*	4.27052	3.29106	4.84857	-1.29522	0.00181782	0.00780298	367	ENSG00000081277	201252580	201302121	+	inside	25966	23175	NearestLocation	PKP1
chr17	12130826	12131226	401	*	4.98239	4.3536	5.41884	-0.971817	0.00181947	0.00780298	1807	ENSG00000265400	12104917	12118584	+	downstream	25909	12242	NearestLocation	NA
chr4	119819419	119819819	401	*	3.46147	0	4.40232	-1.65811	0.0018325	0.00785166	3242	ENSG00000172403	119809996	119982402	+	inside	9423	9423	NearestLocation	SYNPO2
chr7	44349234	44349634	401	*	3.37788	1.41832	4.17937	-1.68255	0.00183696	0.00786352	4017	ENSG00000058404	44256749	44374176	-	inside	24942	24542	NearestLocation	CAMK2B
chr9	38598198	38598598	401	*	4.35467	3.41713	4.9182	-1.2626	0.00185016	0.0079032	4465	ENSG00000273170	38540566	38577204	-	upstream	-20994	20994	NearestLocation	NA
chr7	116654714	116655114	401	*	4.28308	3.28715	4.86668	-1.30424	0.00185022	0.0079032	4114	ENSG00000213050	116612219	116612965	-	upstream	-41749	41749	NearestLocation	NA
chr10	101673676	101674076	401	*	3.3736	1.41832	4.17445	-1.68132	0.00185131	0.0079032	661	ENSG00000227695	101686767	101718138	+	upstream	-13091	12691	NearestLocation	DNMBP-AS1
chr12	101961653	101962053	401	*	5.15618	4.58454	5.56451	-0.90497	0.0018634	0.00794757	1142	ENSG00000196091	101962131	102079796	+	upstream	-478	78	NearestLocation	MYBPC1
chr3	135853880	135854280	401	*	4.09578	3.00328	4.7103	-1.36971	0.00187074	0.00797157	2983	ENSG00000241438	135874391	135874838	+	upstream	-20511	20111	NearestLocation	NA
chr11	113947662	113948062	401	*	4.015	2.83276	4.65593	-1.42211	0.00187596	0.00797604	914	ENSG00000221112	113957533	113957651	-	downstream	9989	9471	NearestLocation	NA
chr2	8749577	8749977	401	*	4.79957	4.08078	5.27713	-1.07139	0.00187657	0.00797604	2171	ENSG00000225642	8743212	8743489	+	downstream	6365	6088	NearestLocation	NA
chr14	69197058	69197458	401	*	5.07268	4.47626	5.49342	-0.939551	0.00187794	0.00797604	1427	ENSG00000207089	69202639	69202745	-	downstream	5687	5181	NearestLocation	RNU6-921P
chr13	79980278	79980678	401	*	3.73034	2.41594	4.40652	-1.49158	0.00187863	0.00797604	1300	ENSG00000139746	79885962	79980612	-	overlapStart	334	66	NearestLocation	RBM26
chr20	49878736	49879136	401	*	3.72866	2.41594	4.40442	-1.49058	0.00189891	0.00805481	2631	ENSG00000263592	49794042	49794136	+	downstream	84694	84600	NearestLocation	NA
chr19	55850353	55850753	401	*	3.73369	2.41594	4.41071	-1.49119	0.00190183	0.0080599	2150	ENSG00000133247	55851221	55859488	+	upstream	-868	468	NearestLocation	KMT5C
chr2	27494551	27494951	401	*	4.83579	4.1529	5.29741	-1.02958	0.00191278	0.00809339	2203	ENSG00000163793	27498289	27504367	+	upstream	-3738	3338	NearestLocation	DNAJC5G
chr8	118007875	118008275	401	*	4.29089	3.29106	4.8758	-1.30492	0.0019132	0.00809339	4361	ENSG00000244033	118030185	118030485	+	upstream	-22310	21910	NearestLocation	RN7SL228P
chr5	146257314	146257714	401	*	5.19553	4.63833	5.59649	-0.888034	0.00191673	0.00810095	3584	ENSG00000249553	146293770	146299069	-	downstream	41755	36056	NearestLocation	PPP2R2B-IT1
chr15	64439055	64439455	401	*	4.08627	3.0017	4.69835	-1.36595	0.00192009	0.008106	1565	ENSG00000157734	64443914	64449680	+	upstream	-4859	4459	NearestLocation	SNX22
chr14	22953578	22953978	401	*	3.73321	2.41355	4.41071	-1.49043	0.00192319	0.008106	1362	ENSG00000211838	22955216	22955284	+	upstream	-1638	1238	NearestLocation	TRAJ52
chr10	22438055	22438455	401	*	3.47969	1.83098	4.22908	-1.61201	0.00192487	0.008106	512	ENSG00000232497	22451921	22454723	+	upstream	-13866	13466	NearestLocation	NA
chr2	228924363	228924763	401	*	3.47969	1.83098	4.22908	-1.61201	0.00192487	0.008106	2534	ENSG00000200281	229034459	229034565	+	upstream	-110096	109696	NearestLocation	RNU6-624P
chr5	9621652	9622052	401	*	4.68236	3.91802	5.17937	-1.10985	0.00192693	0.00810736	3367	ENSG00000248525	9621489	9658570	-	inside	36918	163	NearestLocation	NA
chr4	139725864	139726264	401	*	5.19389	4.63884	5.59373	-0.887569	0.0019314	0.00811885	3265	ENSG00000238971	139732832	139732920	-	downstream	7056	6568	NearestLocation	NA
chr6	17097950	17098350	401	*	3.98035	2.83098	4.61185	-1.4011	0.00193914	0.00814404	3684	ENSG00000230873	17102489	17131603	+	upstream	-4539	4139	NearestLocation	STMND1
chr3	137730576	137730976	401	*	3.72698	2.41594	4.40232	-1.48867	0.00194329	0.00815155	2986	ENSG00000272609	137723491	137723964	-	upstream	-6612	6612	NearestLocation	NA
chr1	145507492	145507892	401	*	3.84761	2.63731	4.49638	-1.43711	0.00194442	0.00815155	252	ENSG00000131795	145507598	145513536	+	overlapStart	-106	106	NearestLocation	NA
chr4	157350852	157351252	401	*	3.60268	2.15433	4.3107	-1.5452	0.00195248	0.00817465	3301	ENSG00000221189	157217713	157217798	-	upstream	-133054	133054	NearestLocation	NA
chr4	77870780	77871180	401	*	3.60085	2.15433	4.30845	-1.54489	0.00195472	0.00817465	3178	ENSG00000138758	77870856	77961537	+	overlapStart	-76	76	NearestLocation	SEPTIN11
chr7	2844981	2845381	401	*	3.85224	2.63731	4.50228	-1.43748	0.00195834	0.00817465	3961	ENSG00000231357	2875255	2875656	+	upstream	-30274	29874	NearestLocation	LOC100131264
chr4	95636885	95637285	401	*	4.16997	3.15147	4.76105	-1.31821	0.00195868	0.00817465	3206	ENSG00000249951	95596396	95623721	+	downstream	40489	13164	NearestLocation	NA
chr1	144520200	144520600	401	*	4.88412	4.22295	5.33581	-1.00556	0.00195869	0.00817465	249	ENSG00000236943	144456138	144521970	-	inside	1770	1370	NearestLocation	NA
chr18	10016299	10016699	401	*	4.3587	3.41594	4.92407	-1.2618	0.00196625	0.00819582	1954	ENSG00000263630	10005097	10005194	-	upstream	-11105	11105	NearestLocation	NA
chrX	104157983	104158383	401	*	4.07997	3.0017	4.69011	-1.35751	0.00196728	0.00819582	4644	ENSG00000223733	104048595	104049120	+	downstream	109388	108863	NearestLocation	RPL18AP14
chr20	55732234	55732634	401	*	3.73584	2.41832	4.4128	-1.48859	0.0019786	0.00822359	2647	ENSG00000203266	55689971	55697148	+	downstream	42263	35086	NearestLocation	NA
chr10	134957384	134957784	401	*	3.85026	2.63526	4.50031	-1.43658	0.00197948	0.00822359	722	ENSG00000235264	134958116	134958808	-	downstream	1424	332	NearestLocation	RPL5P28
chr6	44439301	44439701	401	*	3.59901	2.15433	4.30621	-1.5436	0.00197994	0.00822359	3735	ENSG00000266619	44403378	44403459	+	downstream	35923	35842	NearestLocation	MIR4642
chr2	178619212	178619612	401	*	4.43536	3.52976	4.98742	-1.232	0.00198099	0.00822359	2439	ENSG00000229941	178563157	178588017	+	downstream	56055	31195	NearestLocation	PDE11A-AS1
chr18	10408104	10408504	401	*	5.74661	5.32203	6.07423	-0.718277	0.00199119	0.008255	1955	ENSG00000260913	10405130	10414512	-	inside	6408	2974	NearestLocation	LINC01254
chr5	45095206	45095606	401	*	4.25885	3.28976	4.83336	-1.28238	0.00199275	0.008255	3418	ENSG00000248148	45035301	45098749	+	inside	59905	3143	NearestLocation	NA
chr14	75704508	75704908	401	*	3.84651	2.63935	4.4944	-1.43521	0.00199387	0.008255	1442	ENSG00000258820	75726114	75738653	+	upstream	-21606	21206	NearestLocation	NA
chr17	4244883	4245283	401	*	4.93345	4.28911	5.37728	-0.990248	0.00201476	0.00833409	1791	ENSG00000263882	4267463	4267748	-	downstream	22865	22180	NearestLocation	RN7SL774P
chr1	41284072	41284472	401	*	4.17403	3.1529	4.76597	-1.31778	0.00202073	0.0083514	107	ENSG00000264582	41270518	41270811	+	downstream	13554	13261	NearestLocation	RN7SL326P
chr2	40357433	40357833	401	*	4.35901	3.41713	4.92407	-1.26061	0.00202413	0.00835617	2236	ENSG00000268898	40488147	40490117	+	upstream	-130714	130314	NearestLocation	NA
chr2	66716576	66716976	401	*	4.4967	3.63935	5.0308	-1.19402	0.00202547	0.00835617	2276	ENSG00000244522	66666575	66668968	-	upstream	-47608	47608	NearestLocation	NA
chr18	3220072	3220472	401	*	5.02241	4.41594	5.44808	-0.948939	0.00203069	0.00836686	1936	ENSG00000101605	3066805	3220106	-	overlapStart	34	34	NearestLocation	MYOM1
chr18	3220072	3220472	401	*	5.02241	4.41594	5.44808	-0.948939	0.00203069	0.00836686	1936	LRG_426	3066805	3220106	-	overlapStart	34	34	NearestLocation	NA
chr1	183956780	183957180	401	*	4.49839	3.63833	5.03352	-1.19469	0.00203164	0.00836686	345	ENSG00000198756	183898796	184006863	-	inside	50083	49683	NearestLocation	COLGALT2
chr22	33276951	33277351	401	*	4.73256	4.00249	5.21501	-1.07895	0.00203587	0.00837685	2737	ENSG00000183531	33256006	33256420	-	upstream	-20531	20531	NearestLocation	NA
chr19	4342735	4343135	401	*	3.96036	2.82919	4.58653	-1.38757	0.00205335	0.00843914	2049	ENSG00000178078	4324040	4342783	-	overlapStart	48	48	NearestLocation	STAP2
chr8	94576703	94577103	401	*	4.42169	3.53197	4.96794	-1.22019	0.00205462	0.00843914	4323	ENSG00000253781	94658294	94659320	+	upstream	-81591	81191	NearestLocation	ZNF317P1
chr1	86078468	86078868	401	*	4.75911	4.0009	5.25354	-1.10025	0.00206167	0.00846063	193	ENSG00000230285	86064814	86066417	+	downstream	13654	12051	NearestLocation	NA
chr8	126198786	126199186	401	*	4.39839	3.41475	4.97786	-1.28884	0.00206423	0.00846371	4377	ENSG00000242170	126282846	126283142	+	upstream	-84060	83660	NearestLocation	RN7SL329P
chr6	162658327	162658727	401	*	4.08091	3.00011	4.69183	-1.35538	0.0020695	0.00847785	3935	ENSG00000227913	162989411	162990760	+	upstream	-331084	330684	NearestLocation	KRT8P44
chr4	103519353	103519753	401	*	4.46273	3.53086	5.02425	-1.25009	0.00208296	0.00852313	3217	ENSG00000238553	103487032	103487124	-	upstream	-32229	32229	NearestLocation	NA
chr10	116480636	116481036	401	*	5.14916	4.5856	5.55338	-0.895044	0.0020842	0.00852313	700	ENSG00000228169	116449902	116450393	-	upstream	-30243	30243	NearestLocation	NA
chr3	183735949	183736349	401	*	3.95648	2.83098	4.58096	-1.38563	0.00208924	0.00853203	3051	ENSG00000114770	183637722	183735803	-	upstream	-146	146	NearestLocation	ABCC5
chr6	113964355	113964755	401	*	4.17086	3.15004	4.76269	-1.31564	0.00209004	0.00853203	3835	ENSG00000230943	113944737	113971276	-	inside	6921	6521	NearestLocation	LINC02541
chr7	133811642	133812042	401	*	3.35241	1.41832	4.1501	-1.66207	0.00209876	0.00856016	4137	ENSG00000155530	133812052	133949343	+	upstream	-410	10	NearestLocation	LRGUK
chr9	132963541	132963941	401	*	4.06132	3.00011	4.66613	-1.34308	0.0021271	0.00866431	4587	ENSG00000107130	132934857	132999583	+	inside	28684	28684	NearestLocation	NCS1
chr8	135807239	135807639	401	*	3.95689	2.83276	4.58096	-1.38453	0.00212801	0.00866431	4396	ENSG00000259820	135804263	135810515	-	inside	3276	2876	NearestLocation	NA
chr3	16509626	16510026	401	*	4.34507	3.41713	4.90519	-1.24848	0.00213328	0.00867818	2806	ENSG00000131378	16355081	16555533	-	inside	45907	45507	NearestLocation	RFTN1
chr2	179493308	179493708	401	*	5.66249	5.22397	5.99832	-0.737744	0.00213671	0.00868458	2441	ENSG00000271141	179481308	179481850	+	downstream	12000	11458	NearestLocation	NA
chr4	160149003	160149403	401	*	4.97214	4.35423	5.40337	-0.959666	0.00214217	0.00869917	3307	ENSG00000216089	160216866	160216935	+	upstream	-67863	67463	NearestLocation	NA
chr16	5238307	5238707	401	*	3.71212	2.41594	4.38369	-1.47333	0.00214425	0.00870006	1651	ENSG00000260431	5257089	5257440	+	upstream	-18782	18382	NearestLocation	NA
chr6	151203257	151203657	401	*	3.71382	2.41594	4.38582	-1.47317	0.00215625	0.00874116	3914	ENSG00000120254	151186685	151423023	+	inside	16572	16572	NearestLocation	MTHFD1L
chr2	44588470	44588870	401	*	3.71261	2.41832	4.38369	-1.47251	0.00216774	0.0087801	2245	ENSG00000138078	44543420	44589001	-	inside	531	131	NearestLocation	PREPL
chr22	43411236	43411636	401	*	3.60868	2.15719	4.31741	-1.53677	0.00217485	0.00878524	2768	ENSG00000100266	43231418	43411151	-	upstream	-85	85	NearestLocation	PACSIN2
chr11	14678621	14679021	401	*	3.35676	1.41832	4.1551	-1.65774	0.00217654	0.00878524	759	ENSG00000152270	14665269	14892350	+	inside	13352	13352	NearestLocation	PDE3B
chr7	123283854	123284254	401	*	3.35676	1.41832	4.1551	-1.65774	0.00217654	0.00878524	4120	ENSG00000170807	123295861	123304344	+	upstream	-12007	11607	NearestLocation	LMOD2
chr10	18641057	18641457	401	*	3.70994	2.41355	4.38156	-1.47202	0.00217742	0.00878524	503	ENSG00000235020	18523097	18550123	-	upstream	-90934	90934	NearestLocation	NA
chr8	565308	565708	401	*	3.71334	2.41355	4.38582	-1.47247	0.00217842	0.00878524	4178	ENSG00000180190	439803	495781	-	upstream	-69527	69527	NearestLocation	TDRP
chr7	23140298	23140698	401	*	3.83239	2.63731	4.47693	-1.42069	0.00218726	0.00880898	3983	ENSG00000230658	23140847	23145322	-	downstream	5024	149	NearestLocation	NA
chr13	58448655	58449055	401	*	4.06437	3.0017	4.66963	-1.34221	0.00218997	0.00880898	1279	ENSG00000202422	58565484	58565598	+	upstream	-116829	116429	NearestLocation	RNA5SP30
chr19	37997378	37997778	401	*	4.06437	3.0017	4.66963	-1.34221	0.00218997	0.00880898	2105	ENSG00000188227	37997841	38039664	+	upstream	-463	63	NearestLocation	ZNF793
chr1	200880855	200881255	401	*	3.71552	2.41594	4.38795	-1.47215	0.00219461	0.00881838	366	ENSG00000233217	200890122	200935658	+	upstream	-9267	8867	NearestLocation	MROH3P
chr14	58605090	58605490	401	*	3.46002	1.83098	4.20564	-1.59267	0.00219609	0.00881838	1407	ENSG00000243023	58607997	58608378	+	upstream	-2907	2507	NearestLocation	NA
chr1	101631458	101631858	401	*	3.83128	2.63935	4.47493	-1.42005	0.00219861	0.00881882	217	ENSG00000271578	101656076	101656550	+	upstream	-24618	24218	NearestLocation	NA
chr3	6108523	6108923	401	*	3.458	1.83098	4.20323	-1.59216	0.00220293	0.00881882	2787	ENSG00000226022	6190171	6407572	+	upstream	-81648	81248	NearestLocation	NA
chr4	45319263	45319663	401	*	3.458	1.83098	4.20323	-1.59216	0.00220293	0.00881882	3135	ENSG00000248320	45325270	45328045	-	downstream	8782	5607	NearestLocation	NA
chr11	78268069	78268469	401	*	3.83395	2.63731	4.47893	-1.42045	0.002205	0.00881882	853	ENSG00000137513	78147007	78285919	-	inside	17850	17450	NearestLocation	NARS2
chr8	36437304	36437704	401	*	4.05865	3.00011	4.66262	-1.34057	0.00220608	0.00881882	4244	ENSG00000244708	36438698	36439109	-	downstream	1805	994	NearestLocation	RPL23P10
chr12	27444732	27445132	401	*	4.05904	3.0017	4.66262	-1.34044	0.00220915	0.00881882	1014	ENSG00000029153	27485787	27576241	+	upstream	-41055	40655	NearestLocation	ARNTL2
chr2	139535589	139535989	401	*	5.05977	4.47455	5.47493	-0.920683	0.00221127	0.00881882	2384	ENSG00000144227	139428342	139537918	-	inside	2329	1929	NearestLocation	NXPH2
chr1	8763315	8763715	401	*	4.82713	4.15219	5.28514	-1.01763	0.00221132	0.00881882	22	ENSG00000234619	8810489	8811146	+	upstream	-47174	46774	NearestLocation	RPL7P11
chr1	99862591	99862991	401	*	4.0826	3.0017	4.69355	-1.35169	0.00223779	0.00890915	212	ENSG00000233983	99929934	99930332	+	upstream	-67343	66943	NearestLocation	NA
chr11	111749813	111750213	401	*	4.0826	3.0017	4.69355	-1.35169	0.00223779	0.00890915	907	ENSG00000258529	111657010	111750149	-	overlapStart	336	64	NearestLocation	NA
chr5	72143708	72144108	401	*	3.58038	2.15147	4.284	-1.52546	0.00224412	0.00892675	3461	ENSG00000263593	72174418	72174490	+	upstream	-30710	30310	NearestLocation	MIR4804
chr9	71830836	71831236	401	*	4.15942	3.1529	4.74654	-1.30295	0.00224764	0.00893312	4483	ENSG00000269295	71869331	71869642	-	downstream	38806	38095	NearestLocation	NA
chr12	105062143	105062543	401	*	4.61325	3.83098	5.11767	-1.1249	0.00224997	0.00893355	1147	ENSG00000264295	104985411	104985494	+	downstream	76732	76649	NearestLocation	MIR3922
chr9	37415240	37415640	401	*	3.58224	2.15147	4.28628	-1.52533	0.00225337	0.00893355	4458	ENSG00000137106	37422663	37436987	+	upstream	-7423	7023	NearestLocation	GRHPR
chr2	159757803	159758203	401	*	3.83551	2.63731	4.48092	-1.41937	0.00225349	0.00893355	2400	ENSG00000188668	159731154	159732182	+	downstream	26649	25621	NearestLocation	OR7E90P
chr15	36897984	36898384	401	*	3.83172	2.64139	4.47493	-1.4183	0.00225841	0.0089343	1513	ENSG00000261635	36905675	36906399	+	upstream	-7691	7291	NearestLocation	NA
chr13	33809241	33809641	401	*	3.70702	2.41594	4.37728	-1.46875	0.00226052	0.0089343	1236	ENSG00000236581	33845516	33855471	+	upstream	-36275	35875	NearestLocation	STARD13-AS
chr2	191399103	191399503	401	*	3.70702	2.41594	4.37728	-1.46875	0.00226052	0.0089343	2461	ENSG00000189362	191369068	191399448	-	overlapStart	345	55	NearestLocation	NEMP2
chr3	192746096	192746496	401	*	3.57852	2.15147	4.28172	-1.52459	0.00226134	0.0089343	3073	ENSG00000180611	192514604	192635950	-	upstream	-110146	110146	NearestLocation	MB21D2
chr8	81962806	81963206	401	*	4.06569	3.0017	4.67137	-1.3405	0.00228093	0.00900408	4306	ENSG00000254177	81970758	81979979	+	upstream	-7952	7552	NearestLocation	NA
chr11	60424088	60424488	401	*	5.10356	4.53197	5.51186	-0.902673	0.00229336	0.00904548	818	ENSG00000181995	60383209	60454622	+	inside	40879	30134	NearestLocation	LINC00301
chr10	105554231	105554631	401	*	3.57666	2.15147	4.27943	-1.52269	0.00230605	0.00908788	676	ENSG00000107957	105348285	105615301	-	inside	61070	60670	NearestLocation	SH3PXD2A
chr6	54729880	54730280	401	*	4.34539	3.41832	4.90519	-1.24524	0.00231342	0.00910921	3751	ENSG00000168143	54711569	54806820	+	inside	18311	18311	NearestLocation	FAM83B
chr15	47690758	47691158	401	*	4.49247	3.63833	5.02534	-1.188	0.00232194	0.00913506	1538	ENSG00000259360	47689698	47691751	-	inside	993	593	NearestLocation	NA
chr5	207291	207691	401	*	3.94196	2.82919	4.56263	-1.37038	0.00232653	0.00914541	3358	ENSG00000260774	214013	217394	-	downstream	10103	6322	NearestLocation	NA
chr8	75667808	75668208	401	*	4.61649	3.83276	5.12151	-1.12458	0.00234746	0.00921989	4298	ENSG00000253777	75716522	75717046	-	downstream	49238	48314	NearestLocation	NA
chr8	93115375	93115775	401	*	4.555	3.7393	5.0729	-1.15468	0.00235275	0.00923291	4319	ENSG00000079102	92967203	93115514	-	overlapStart	139	139	NearestLocation	RUNX1T1
chrX	68783058	68783458	401	*	4.24692	3.29236	4.81641	-1.26561	0.00235817	0.00924335	4637	ENSG00000228160	68789512	68790200	-	downstream	7142	6054	NearestLocation	NA
chr8	127600757	127601157	401	*	4.48347	3.63731	5.01327	-1.17909	0.00235937	0.00924335	4383	ENSG00000253543	127594876	127595251	-	upstream	-5506	5506	NearestLocation	NA
chr13	87776351	87776751	401	*	3.57479	2.15147	4.27713	-1.51948	0.00238679	0.0093429	1307	ENSG00000228074	87871259	87871524	+	upstream	-94908	94508	NearestLocation	NA
chr15	25103913	25104313	401	*	5.47386	5.0009	5.82946	-0.784061	0.0023984	0.0093805	1489	ENSG00000238615	25138894	25138995	+	upstream	-34981	34581	NearestLocation	NA
chr1	70820312	70820712	401	*	3.83306	2.63321	4.47893	-1.41458	0.00242258	0.00946712	162	ENSG00000118454	70726271	70820417	-	overlapStart	105	105	NearestLocation	ANKRD13C
chr6	143265594	143265994	401	*	4.05808	3.00328	4.66086	-1.33515	0.00242496	0.00946849	3899	ENSG00000010818	143072604	143266338	-	inside	744	344	NearestLocation	HIVEP2
chr5	172708836	172709236	401	*	4.54706	3.73739	5.06256	-1.14557	0.00243308	0.00949228	3637	ENSG00000252169	172719520	172719622	-	downstream	10786	10284	NearestLocation	RNA5SP200
chr6	112033622	112034022	401	*	4.24826	3.28846	4.81957	-1.26508	0.0024404	0.00951286	3828	ENSG00000239015	111967530	111967630	-	upstream	-65992	65992	NearestLocation	NA
chr3	16813569	16813969	401	*	5.29977	4.7854	5.67817	-0.832253	0.00244673	0.00952958	2808	ENSG00000154822	16844159	17132086	+	upstream	-30590	30190	NearestLocation	PLCL2
chrX	54665805	54666205	401	*	3.69368	2.41594	4.36049	-1.45453	0.00245745	0.00955255	4635	ENSG00000215197	54698418	54699071	+	upstream	-32613	32213	NearestLocation	NA
chr8	108080895	108081295	401	*	3.69196	2.41594	4.35832	-1.45427	0.0024582	0.00955255	4350	ENSG00000254146	108185428	108186037	-	downstream	105142	104133	NearestLocation	HMGB1P46
chr6	42420010	42420410	401	*	4.41089	3.52976	4.95394	-1.20486	0.00245877	0.00955255	3730	ENSG00000124496	42192669	42419789	-	upstream	-221	221	NearestLocation	TRERF1
chr11	44161167	44161567	401	*	3.33028	1.41355	4.12534	-1.63792	0.00246814	0.00957555	800	ENSG00000151348	44117099	44266979	+	inside	44068	44068	NearestLocation	EXT2
chr20	25172450	25172850	401	*	4.04455	3.0017	4.64352	-1.32511	0.00246879	0.00957555	2595	ENSG00000197586	25176329	25207365	+	upstream	-3879	3479	NearestLocation	ENTPD6
chr3	72338106	72338506	401	*	4.14214	3.1529	4.72349	-1.28761	0.00248237	0.00962021	2906	ENSG00000212070	72311473	72311579	-	upstream	-26527	26527	NearestLocation	NA
chr22	33420675	33421075	401	*	3.69245	2.41832	4.35832	-1.45345	0.0024847	0.00962127	2739	ENSG00000228194	33410965	33411446	+	downstream	9710	9229	NearestLocation	NA
chr1	64985534	64985934	401	*	4.54828	3.73834	5.06389	-1.14519	0.00248731	0.00962337	151	ENSG00000158966	64936428	65158741	+	inside	49106	49106	NearestLocation	CACHD1
chr6	50558894	50559294	401	*	4.407	3.53086	4.94819	-1.2028	0.00249291	0.00963706	3743	ENSG00000230472	50555320	50604918	-	inside	46024	3574	NearestLocation	NA
chr7	16886978	16887378	401	*	3.81543	2.63731	4.45519	-1.40287	0.00249583	0.00963736	3976	ENSG00000270593	16889581	16890349	-	downstream	3371	2203	NearestLocation	NA
chr2	106104749	106105149	401	*	3.81588	2.63935	4.45519	-1.40277	0.00249785	0.00963736	2326	ENSG00000115641	105974169	106054970	-	upstream	-49779	49779	NearestLocation	FHL2
chr14	55589356	55589756	401	*	4.60523	3.83098	5.10635	-1.1133	0.00249919	0.00963736	1403	ENSG00000131981	55590828	55612126	+	upstream	-1472	1072	NearestLocation	LGALS3
chr15	26806241	26806641	401	*	4.66089	3.91802	5.14885	-1.08364	0.00251534	0.00969163	1491	ENSG00000235518	26902177	26903910	-	downstream	97669	95536	NearestLocation	NA
chr5	171116682	171117082	401	*	3.81227	2.63731	4.45113	-1.40174	0.00251907	0.00969307	3624	ENSG00000264303	171197534	171197724	+	upstream	-80852	80452	NearestLocation	NA
chr10	85305762	85306162	401	*	3.57292	2.15147	4.27484	-1.51446	0.00251987	0.00969307	623	ENSG00000265268	85196790	85196885	-	upstream	-108877	108877	NearestLocation	NA
chr22	20231465	20231865	401	*	5.33347	4.83142	5.70519	-0.818063	0.00253143	0.00972954	2711	ENSG00000221039	20236657	20236734	-	downstream	5269	4792	NearestLocation	MIR1286
chr4	4341193	4341593	401	*	3.68851	2.41594	4.35398	-1.45122	0.00254546	0.00977541	3092	ENSG00000168824	4349867	4420785	+	upstream	-8674	8274	NearestLocation	NSG1
chr15	85889899	85890299	401	*	3.8134	2.63526	4.45316	-1.40122	0.00255198	0.0097924	1621	ENSG00000218052	85798600	85873565	-	upstream	-16334	16334	NearestLocation	ADAMTS7P4
chr10	67311902	67312302	401	*	3.43538	1.82739	4.17691	-1.57	0.00257189	0.00985257	583	ENSG00000228065	67330096	67526299	+	upstream	-18194	17794	NearestLocation	NA
chr4	128801698	128802098	401	*	3.43538	1.82739	4.17691	-1.57	0.00257189	0.00985257	3260	ENSG00000142731	128802016	128820350	+	overlapStart	-318	82	NearestLocation	PLK4
chr5	113306818	113307218	401	*	4.76862	4.07777	5.23382	-1.03005	0.00257631	0.00985973	3519	ENSG00000251628	113391703	113392871	+	upstream	-84885	84485	NearestLocation	NA
chr4	95128842	95129242	401	*	3.6976	2.41832	4.36481	-1.45146	0.00257997	0.00985973	3202	ENSG00000163104	95128762	95212443	+	inside	80	80	NearestLocation	SMARCAD1
chr19	41816012	41816412	401	*	3.81068	2.63731	4.4491	-1.39992	0.0025801	0.00985973	2119	ENSG00000142039	41816094	41830788	+	overlapStart	-82	82	NearestLocation	CCDC97
chr3	131321166	131321566	401	*	3.24017	0.830976	4.09754	-1.66702	0.00258864	0.00988428	2980	ENSG00000251447	131256415	131256529	-	upstream	-64637	64637	NearestLocation	NA
chr2	229213398	229213798	401	*	5.47224	5.0017	5.82648	-0.776694	0.00259902	0.00991579	2536	ENSG00000203387	229216836	229217931	-	downstream	4533	3038	NearestLocation	NA
chr15	41849786	41850186	401	*	3.56258	2.15433	4.26145	-1.50461	0.0026156	0.0099709	1524	ENSG00000092445	41849873	41871536	+	overlapStart	-87	87	NearestLocation	TYRO3
chr5	15366612	15367012	401	*	4.39774	3.53086	4.93545	-1.19203	0.00263746	0.010046	3383	ENSG00000248834	15384329	15384962	+	upstream	-17717	17317	NearestLocation	MARK2P5
chr8	4373345	4373745	401	*	5.05005	4.47512	5.46005	-0.90867	0.00265364	0.0100884	4185	ENSG00000264588	4250344	4250612	+	downstream	123001	122733	NearestLocation	NA
chr4	87552310	87552710	401	*	3.2314	0.838111	4.08711	-1.66282	0.00265462	0.0100884	3192	ENSG00000163629	87515468	87736324	+	inside	36842	36842	NearestLocation	PTPN13
chrX	76990878	76991278	401	*	4.36867	4.87515	3.58134	1.13127	0.00265507	0.0100884	4641	ENSG00000237106	76983344	76983557	+	downstream	7534	7321	NearestLocation	NA
chr10	106428536	106428936	401	*	3.81814	2.63526	4.45925	-1.39884	0.00268462	0.0101924	678	ENSG00000226387	106424366	106425958	-	upstream	-2578	2578	NearestLocation	SORCS3-AS1
chr16	86397769	86398169	401	*	3.92373	2.83098	4.53833	-1.35175	0.00269032	0.0102057	1757	ENSG00000168367	86365450	86383289	-	upstream	-14480	14480	NearestLocation	LINC00917
chr1	211432558	211432958	401	*	4.05503	3.0017	4.65734	-1.32828	0.00271819	0.0103031	396	ENSG00000117625	211431719	211489727	+	inside	839	839	NearestLocation	RCOR3
chr9	85882645	85883045	401	*	4.66039	3.91633	5.14885	-1.08151	0.00273954	0.0103692	4501	ENSG00000251752	85890856	85891029	+	upstream	-8211	7811	NearestLocation	RNU4-29P
chr15	85176514	85176914	401	*	3.93104	2.83098	4.54787	-1.35226	0.00274008	0.0103692	1619	ENSG00000254779	85177105	85177866	+	upstream	-591	191	NearestLocation	NA
chr17	38501277	38501677	401	*	5.13266	4.58454	5.52892	-0.874076	0.00275212	0.0104063	1855	ENSG00000265666	38497119	38499388	-	upstream	-1889	1889	NearestLocation	RARA-AS1
chr9	130021254	130021654	401	*	4.03264	3.0017	4.62778	-1.3103	0.00275544	0.0104104	4580	ENSG00000136895	129986544	130155939	+	inside	34710	34710	NearestLocation	GARNL3
chr22	47080557	47080957	401	*	5.00234	4.41653	5.4178	-0.918391	0.00276711	0.0104448	2778	ENSG00000100422	47080308	47134158	-	inside	53601	249	NearestLocation	CERK
chr6	107614021	107614421	401	*	4.02992	3.0017	4.62417	-1.30937	0.00277057	0.0104448	3821	ENSG00000203281	107584371	107584617	-	upstream	-29404	29404	NearestLocation	NA
chr13	31191016	31191416	401	*	4.04667	3.00487	4.6453	-1.31924	0.00277126	0.0104448	1229	ENSG00000189403	31032884	31191734	-	inside	718	318	NearestLocation	HMGB1
chr10	107518255	107518655	401	*	4.60654	3.82919	5.10893	-1.11097	0.00279134	0.010512	683	ENSG00000229466	107568533	107578955	-	downstream	60700	49878	NearestLocation	NA
chr10	44312133	44312533	401	*	4.034	3.0017	4.62957	-1.30957	0.00281298	0.0105737	547	ENSG00000226790	44282860	44285865	-	upstream	-26268	26268	NearestLocation	NA
chr14	66512256	66512656	401	*	4.034	3.0017	4.62957	-1.30957	0.00281298	0.0105737	1421	ENSG00000224861	66479548	66480507	-	upstream	-31749	31749	NearestLocation	NA
chr6	143998951	143999351	401	*	4.12847	3.1529	4.70519	-1.2719	0.00281452	0.0105737	3901	ENSG00000235740	143875462	143883168	-	upstream	-115783	115783	NearestLocation	PHACTR2-AS1
chr11	12125424	12125824	401	*	3.30395	1.41355	4.09494	-1.61691	0.00281821	0.0105791	749	ENSG00000133816	12115543	12285334	+	inside	9881	9881	NearestLocation	MICALCL;MICAL2
chr3	69774221	69774621	401	*	4.26772	3.29366	4.84393	-1.27404	0.00282272	0.0105875	2897	ENSG00000187098	69788586	70017488	+	upstream	-14365	13965	NearestLocation	MITF
chr3	170587798	170588198	401	*	3.67499	2.41594	4.33691	-1.43516	0.00282818	0.0105994	3032	ENSG00000163584	170582664	170588272	-	inside	474	74	NearestLocation	RPL22L1
chr1	168687354	168687754	401	*	4.02856	3.0017	4.62237	-1.30766	0.0028444	0.0106517	317	ENSG00000143196	168664697	168698502	-	inside	11148	10748	NearestLocation	DPT
chr1	111907327	111907727	401	*	5.32845	4.83098	5.69767	-0.809197	0.002854	0.0106679	225	ENSG00000234020	111895897	111910031	-	inside	2704	2304	NearestLocation	NA
chr12	69004195	69004595	401	*	3.67449	2.41355	4.33691	-1.43446	0.00285661	0.0106679	1085	ENSG00000127314	69004619	69054372	+	upstream	-424	24	NearestLocation	RAP1B
chr6	133953528	133953928	401	*	3.79827	2.63731	4.43312	-1.38456	0.00285876	0.0106679	3874	ENSG00000218213	133997867	133998567	-	downstream	45039	43939	NearestLocation	NA
chr20	46669910	46670310	401	*	3.67549	2.41832	4.33691	-1.43431	0.00285959	0.0106679	2627	ENSG00000237423	46609232	46617488	-	upstream	-52422	52422	NearestLocation	NA
chr11	47373292	47373692	401	*	4.70556	4.0009	5.17691	-1.04342	0.00286017	0.0106679	812	ENSG00000134571	47352957	47374253	-	inside	961	561	NearestLocation	MYBPC3
chr11	47373292	47373692	401	*	4.70556	4.0009	5.17691	-1.04342	0.00286017	0.0106679	812	LRG_386	47352957	47374253	-	inside	961	561	NearestLocation	NA
chr5	122847954	122848354	401	*	3.29782	1.41832	4.08711	-1.61412	0.00286873	0.0106913	3534	ENSG00000151292	122847793	122952739	+	inside	161	161	NearestLocation	CSNK1G3
chr16	10694834	10695234	401	*	3.67673	2.41594	4.33911	-1.43419	0.00287561	0.0106968	1658	ENSG00000213853	10622279	10674555	-	upstream	-20279	20279	NearestLocation	EMP2
chr10	35415919	35416319	401	*	4.59533	3.83098	5.09233	-1.09991	0.00287773	0.0106968	536	ENSG00000230534	35386934	35415948	-	overlapStart	29	29	NearestLocation	NA
chr5	14901123	14901523	401	*	4.59533	3.83098	5.09233	-1.09991	0.00287773	0.0106968	3380	ENSG00000212036	14910667	14910749	-	downstream	9626	9144	NearestLocation	MIR548BA
chr6	94488752	94489152	401	*	5.21362	4.6892	5.59741	-0.842843	0.00288105	0.0106968	3806	ENSG00000252249	94588824	94588947	+	upstream	-100072	99672	NearestLocation	NA
chr13	100258784	100259184	401	*	4.53771	3.73739	5.04946	-1.13133	0.00288167	0.0106968	1324	ENSG00000125246	100258919	100549387	+	overlapStart	-135	135	NearestLocation	CLYBL
chr6	2841428	2841828	401	*	4.1301	3.15433	4.7069	-1.27096	0.00288901	0.0107136	3656	ENSG00000021355	2832566	2842240	-	inside	812	412	NearestLocation	SERPINB1
chr8	9536967	9537367	401	*	4.12683	3.15147	4.70348	-1.27035	0.0028908	0.0107136	4200	ENSG00000253697	9515805	9515948	-	upstream	-21019	21019	NearestLocation	NA
chr17	48890853	48891253	401	*	4.47797	3.63833	5.00526	-1.1646	0.00289722	0.0107286	1876	ENSG00000248702	48874727	48875012	-	upstream	-15841	15841	NearestLocation	NA
chr11	73693571	73693971	401	*	3.2049	0.830976	4.05856	-1.64772	0.00290297	0.0107286	843	ENSG00000175567	73685712	73694352	-	inside	781	381	NearestLocation	UCP2
chr15	70463828	70464228	401	*	3.79392	2.63935	4.42693	-1.38268	0.00290404	0.0107286	1591	ENSG00000200216	70485575	70485683	+	upstream	-21747	21347	NearestLocation	RNU6-745P
chr2	113012294	113012694	401	*	3.79392	2.63935	4.42693	-1.38268	0.00290404	0.0107286	2348	ENSG00000144161	112969102	113012713	-	inside	419	19	NearestLocation	ZC3H8
chr3	153972995	153973395	401	*	3.67723	2.41832	4.33911	-1.43322	0.00291191	0.0107492	3017	ENSG00000174953	153990335	154042286	-	downstream	69291	16940	NearestLocation	DHX36
chr4	124940117	124940517	401	*	4.70385	4.0009	5.17445	-1.04223	0.00293495	0.0108213	3256	ENSG00000250484	124983617	124984145	+	upstream	-43500	43100	NearestLocation	PPIAP76
chr4	124270533	124270933	401	*	3.79918	2.64139	4.43312	-1.38275	0.00293609	0.0108213	3253	ENSG00000164056	124317950	124324910	+	upstream	-47417	47017	NearestLocation	SPRY1
chr17	25801035	25801435	401	*	3.41151	1.83098	4.14759	-1.54942	0.0029409	0.0108305	1833	ENSG00000265801	25792138	25792567	+	downstream	8897	8468	NearestLocation	NA
chr18	57409650	57410050	401	*	4.59375	3.83187	5.08972	-1.09848	0.00294852	0.0108496	2027	ENSG00000221471	57416909	57416989	+	upstream	-7259	6859	NearestLocation	NA
chr5	153983483	153983883	401	*	4.46413	3.63833	4.98602	-1.15337	0.00295073	0.0108496	3601	ENSG00000264760	153975572	153975632	-	upstream	-7851	7851	NearestLocation	MIR3141
chr3	189791112	189791512	401	*	3.41569	1.83098	4.1526	-1.5492	0.00295855	0.0108675	3065	ENSG00000265045	189831723	189832061	+	upstream	-40611	40211	NearestLocation	NA
chr1	174968604	174969004	401	*	3.9093	2.83098	4.51945	-1.33672	0.00296026	0.0108675	330	ENSG00000116161	174968300	174980851	+	inside	304	304	NearestLocation	CACYBP
chr18	3593559	3593959	401	*	4.30435	3.41594	4.85012	-1.20538	0.00296728	0.0108811	1938	ENSG00000177337	3593730	3598350	+	overlapStart	-171	171	NearestLocation	NA
chr11	104422310	104422710	401	*	4.12556	3.15147	4.70178	-1.2687	0.00297017	0.0108811	900	ENSG00000256422	104316596	104480049	-	inside	57739	57339	NearestLocation	LINC02552
chr10	70091691	70092091	401	*	3.66801	2.41594	4.32808	-1.43042	0.0029733	0.0108811	588	ENSG00000108187	70042417	70092806	-	inside	1115	715	NearestLocation	PBLD
chr5	128192959	128193359	401	*	3.66801	2.41594	4.32808	-1.43042	0.0029733	0.0108811	3549	ENSG00000248634	127999671	128078522	+	downstream	193288	114437	NearestLocation	NA
chr17	18967122	18967522	401	*	7.6763	7.83086	7.50316	0.323732	0.00298097	0.0108932	1828	ENSG00000262074	18966762	18967449	-	overlapStart	327	73	NearestLocation	NA
chr12	43063396	43063796	401	*	4.46183	3.63731	4.98321	-1.15231	0.00298581	0.0108932	1033	ENSG00000240759	43072675	43072926	-	downstream	9530	8879	NearestLocation	NA
chr17	31160038	31160438	401	*	4.21712	3.28976	4.77704	-1.23507	0.00298761	0.0108932	1845	ENSG00000201178	31157237	31157347	-	upstream	-2691	2691	NearestLocation	NA
chr3	49066683	49067083	401	*	3.41092	1.82739	4.14759	-1.5477	0.00298984	0.0108932	2861	ENSG00000272434	49066749	49067139	+	overlapStart	-66	56	NearestLocation	NA
chr8	8601516	8601916	401	*	3.53773	2.15147	4.23145	-1.48451	0.00298996	0.0108932	4190	ENSG00000254367	8581203	8639989	-	inside	38473	20313	NearestLocation	NA
chr3	107149766	107150166	401	*	3.53828	2.15433	4.23145	-1.48446	0.0029906	0.0108932	2944	ENSG00000273125	107149777	107182759	+	overlapStart	-11	11	NearestLocation	LINC01990
chr5	133109494	133109894	401	*	5.25096	4.73787	5.62868	-0.827927	0.00299374	0.0108961	3560	ENSG00000251243	133056186	133056625	-	upstream	-52869	52869	NearestLocation	LOC101060035
chr14	73356118	73356518	401	*	5.64673	5.22363	5.97347	-0.714878	0.00299844	0.0109047	1438	ENSG00000205683	73086004	73360809	-	inside	4691	4291	NearestLocation	DPF3
chr17	1587940	1588340	401	*	4.65339	3.91886	5.13777	-1.07022	0.00300222	0.0109099	1782	ENSG00000174231	1553923	1588176	-	overlapStart	236	164	NearestLocation	PRPF8
chr15	79501974	79502374	401	*	3.53582	2.15147	4.22908	-1.48354	0.00301538	0.0109454	1611	ENSG00000207695	79502130	79502213	+	includeFeature	-156	156	NearestLocation	MIR184
chr11	129165568	129165968	401	*	4.2202	3.29236	4.78028	-1.23523	0.00301758	0.0109454	944	ENSG00000255259	129165181	129166376	-	inside	808	387	NearestLocation	ZNF123P
chr4	178984807	178985207	401	*	4.46442	3.63935	4.98602	-1.15253	0.00301903	0.0109454	3332	ENSG00000253000	179037875	179038015	-	downstream	53208	52668	NearestLocation	RNU1-45P
chr5	129307543	129307943	401	*	4.30403	3.41475	4.85012	-1.20469	0.00302325	0.010951	3556	ENSG00000221562	129310584	129310694	+	upstream	-3041	2641	NearestLocation	NA
chr12	27768177	27768577	401	*	4.70787	4.00011	5.1806	-1.04301	0.00302525	0.010951	1016	ENSG00000256557	27761666	27761979	-	upstream	-6198	6198	NearestLocation	NA
chr13	51282648	51283048	401	*	4.21798	3.28846	4.77866	-1.2349	0.0030285	0.0109542	1272	ENSG00000237152	51381992	51423190	+	upstream	-99344	98944	NearestLocation	NA
chr3	14692814	14693214	401	*	4.95064	4.35485	5.37106	-0.927372	0.00304424	0.010998	2801	ENSG00000154781	14693271	14714166	+	upstream	-457	57	NearestLocation	CCDC174
chr10	36403793	36404193	401	*	5.12953	4.58613	5.52332	-0.864846	0.00304531	0.010998	540	ENSG00000227475	36378014	36378317	-	upstream	-25476	25476	NearestLocation	NA
chr20	15203612	15204012	401	*	3.54156	2.15147	4.23618	-1.48323	0.0030503	0.0110075	2579	ENSG00000222500	15261410	15261519	-	downstream	57907	57398	NearestLocation	RNA5SP475
chr10	30014132	30014532	401	*	5.39418	4.91844	5.75134	-0.783071	0.00305304	0.0110089	527	ENSG00000197321	29746267	30025710	-	inside	11578	11178	NearestLocation	SVIL
chr6	76203427	76203827	401	*	5.49716	5.04217	5.84254	-0.7567	0.00305728	0.0110157	3772	ENSG00000118407	76001575	76203454	-	overlapStart	27	27	NearestLocation	FILIP1
chr9	137000664	137001064	401	*	4.0533	3.00011	4.65557	-1.32096	0.00307708	0.0110785	4595	ENSG00000273249	136997364	137000894	-	overlapStart	230	170	NearestLocation	NA
chr9	97647597	97647997	401	*	3.7914	2.63526	4.42486	-1.37856	0.00308166	0.0110864	4528	ENSG00000236095	97662711	97667036	+	upstream	-15114	14714	NearestLocation	NA
chr20	14742716	14743116	401	*	4.13264	3.15433	4.7103	-1.2685	0.00308917	0.0111048	2577	ENSG00000213950	14738209	14738702	+	downstream	4507	4014	NearestLocation	RPS10P2
chr8	89127013	89127413	401	*	3.91415	2.83276	4.52526	-1.3349	0.00310146	0.0111404	4312	ENSG00000253171	88986393	89031341	+	downstream	140620	95672	NearestLocation	NA
chr12	57010716	57011116	401	*	4.01612	3.00011	4.60639	-1.29382	0.0031082	0.0111561	1070	ENSG00000076108	56989380	57030600	-	inside	19884	19484	NearestLocation	BAZ2A
chr16	63114598	63114998	401	*	4.21593	3.28976	4.77542	-1.23278	0.00312083	0.0111928	1712	ENSG00000269986	63100430	63100894	-	upstream	-13704	13704	NearestLocation	NA
chr8	26499232	26499632	401	*	4.38691	3.53307	4.91967	-1.17603	0.00312921	0.0112142	4233	ENSG00000253208	26405185	26405979	+	downstream	94047	93253	NearestLocation	PSME2P5
chr7	76867451	76867851	401	*	3.79025	2.63731	4.42279	-1.37682	0.00314635	0.011262	4057	ENSG00000250990	76875657	76887440	-	downstream	19989	7806	NearestLocation	NA
chr22	27437805	27438205	401	*	5.42732	4.96046	5.77947	-0.771108	0.00314737	0.011262	2727	ENSG00000200443	27431850	27431954	+	downstream	5955	5851	NearestLocation	RNU6-1066P
chr10	88281341	88281741	401	*	4.5254	3.73739	5.03216	-1.11815	0.00316862	0.0113293	628	ENSG00000227896	88281702	88284858	+	overlapStart	-361	39	NearestLocation	NA
chr3	104180281	104180681	401	*	4.01337	3.00011	4.60273	-1.29206	0.00317429	0.0113409	2937	ENSG00000243635	104221544	104222110	+	upstream	-41263	40863	NearestLocation	NA
chr9	89987515	89987915	401	*	4.11338	3.1529	4.68493	-1.25536	0.00321017	0.0114603	4513	ENSG00000228373	90038549	90038808	+	upstream	-51034	50634	NearestLocation	LOC112268032
chr10	18762397	18762797	401	*	4.60327	3.83366	5.10247	-1.10439	0.00323464	0.0115168	505	ENSG00000225527	18820778	18822265	-	downstream	59868	57981	NearestLocation	NA
chr3	66025216	66025616	401	*	4.01887	3.00011	4.61003	-1.2924	0.00323563	0.0115168	2885	ENSG00000151276	65339200	66024509	-	upstream	-707	707	NearestLocation	MAGI1
chr18	57757556	57757956	401	*	3.77766	2.63731	4.40652	-1.36606	0.00324363	0.0115168	2028	ENSG00000267686	57792265	57828428	+	upstream	-34709	34309	NearestLocation	NA
chr12	75784853	75785253	401	*	3.27778	1.41832	4.06389	-1.59452	0.0032437	0.0115168	1097	ENSG00000180481	75784850	75826468	+	inside	3	3	NearestLocation	GLIPR1L2
chr4	83205570	83205970	401	*	3.27778	1.41832	4.06389	-1.59452	0.0032437	0.0115168	3185	ENSG00000234568	83196224	83197753	+	downstream	9346	7817	NearestLocation	NA
chr9	135194757	135195157	401	*	5.2061	4.6897	5.5856	-0.832864	0.00324593	0.0115168	4593	ENSG00000107290	135136743	135230372	-	inside	35615	35215	NearestLocation	SETX
chr9	135194757	135195157	401	*	5.2061	4.6897	5.5856	-0.832864	0.00324593	0.0115168	4593	LRG_268	135136827	135230372	-	inside	35615	35215	NearestLocation	NA
chr4	95341102	95341502	401	*	3.77974	2.63935	4.40862	-1.3662	0.00324821	0.0115168	3205	ENSG00000203436	95371802	95372043	-	downstream	30941	30300	NearestLocation	NA
chr9	100291666	100292066	401	*	3.77974	2.63935	4.40862	-1.3662	0.00324821	0.0115168	4538	ENSG00000228174	100274988	100280118	-	upstream	-11548	11548	NearestLocation	NA
chrX	153979927	153980327	401	*	3.77974	2.63935	4.40862	-1.3662	0.00324821	0.0115168	4660	ENSG00000160219	153903529	153979858	-	upstream	-69	69	NearestLocation	GAB3
chr4	140572713	140573113	401	*	3.65606	2.41594	4.31294	-1.41517	0.0032692	0.0115824	3269	ENSG00000085871	140586922	140661899	+	upstream	-14209	13809	NearestLocation	MGST2
chr3	145357012	145357412	401	*	3.27253	1.41355	4.05856	-1.59241	0.00328878	0.0116373	3000	ENSG00000241695	145402359	145402879	+	upstream	-45347	44947	NearestLocation	NA
chr15	61479026	61479426	401	*	3.78136	2.63935	4.41071	-1.36565	0.00328966	0.0116373	1559	ENSG00000259481	61473448	61488137	+	inside	5578	5578	NearestLocation	NA
chr14	96751898	96752298	401	*	3.27942	1.41355	4.06655	-1.5919	0.0033125	0.011709	1472	ENSG00000258729	96741383	96743060	-	upstream	-8838	8838	NearestLocation	NA
chr4	48034230	48034630	401	*	5.08094	4.53142	5.47793	-0.871407	0.00331495	0.011709	3141	ENSG00000198515	47937994	48018689	-	upstream	-15541	15541	NearestLocation	CNGA1
chr8	101508781	101509181	401	*	3.54592	2.15433	4.24089	-1.47609	0.00332508	0.0117338	4341	ENSG00000254364	101504756	101505941	+	downstream	4025	2840	NearestLocation	NA
chr20	51758135	51758535	401	*	5.49127	5.04062	5.83414	-0.748697	0.00332702	0.0117338	2637	ENSG00000223492	51785182	51796089	-	downstream	37954	26647	NearestLocation	NA
chr8	54672628	54673028	401	*	3.8026	2.63526	4.43929	-1.37554	0.00333276	0.0117452	4271	ENSG00000253668	54625257	54625456	+	downstream	47371	47172	NearestLocation	LOC100129667
chr12	109095476	109095876	401	*	4.69571	4.0017	5.16233	-1.0299	0.00333697	0.0117494	1155	ENSG00000110880	109038885	109125372	-	inside	29896	29496	NearestLocation	CORO1C
chr16	82768745	82769145	401	*	4.22462	3.29106	4.78674	-1.23236	0.00333898	0.0117494	1747	ENSG00000260862	82806924	82863243	+	upstream	-38179	37779	NearestLocation	LOC101928446
chr2	65006544	65006944	401	*	4.79833	4.15219	5.24301	-0.980436	0.00334584	0.0117646	2272	ENSG00000253082	65003238	65003321	+	downstream	3306	3223	NearestLocation	NA
chr18	25232385	25232785	401	*	4.32435	3.41713	4.87701	-1.21726	0.00335294	0.0117808	1972	ENSG00000264151	24916343	25175128	-	upstream	-57257	57257	NearestLocation	NA
chr11	33801503	33801903	401	*	4.69742	4.0017	5.16481	-1.03031	0.00336055	0.0117914	788	ENSG00000255272	33797734	33801041	+	downstream	3769	462	NearestLocation	NA
chr10	33269722	33270122	401	*	3.77487	2.63935	4.40232	-1.36313	0.00336104	0.0117914	532	ENSG00000229656	33247773	33371030	+	inside	21949	21949	NearestLocation	NA
chr18	3526602	3527002	401	*	3.65833	2.41832	4.31517	-1.41266	0.00339066	0.0118794	1937	ENSG00000241223	3571214	3571509	-	downstream	44907	44212	NearestLocation	RN7SL39P
chr2	71454048	71454448	401	*	4.53935	3.73643	5.05214	-1.127	0.00339122	0.0118794	2283	ENSG00000124374	71409869	71454213	-	overlapStart	165	165	NearestLocation	PAIP2B
chr13	104382681	104383081	401	*	3.38876	1.83098	4.12023	-1.52768	0.00339745	0.0118923	1328	ENSG00000230474	104096970	104097318	-	upstream	-285363	285363	NearestLocation	NA
chr3	29481970	29482370	401	*	3.39088	1.83098	4.12278	-1.5276	0.00340667	0.0119067	2817	ENSG00000226216	29432339	29432709	+	downstream	49631	49261	NearestLocation	RPS12P5
chr4	157920243	157920643	401	*	5.72514	5.32267	6.03948	-0.682393	0.00341176	0.0119067	3302	ENSG00000252350	157907524	157907845	-	upstream	-12398	12398	NearestLocation	RPPH1-3P
chr13	114106411	114106811	401	*	6.47578	6.18853	6.71522	-0.512512	0.00341188	0.0119067	1352	ENSG00000153531	114076260	114107839	-	inside	1428	1028	NearestLocation	ADPRHL1
chr4	23868143	23868543	401	*	3.89621	2.83098	4.50228	-1.31905	0.00341342	0.0119067	3109	ENSG00000109819	23756664	23905712	-	inside	37569	37169	NearestLocation	PPARGC1A
chr13	49947884	49948284	401	*	4.38235	3.53197	4.91378	-1.17122	0.00341431	0.0119067	1266	ENSG00000102547	49882786	50018262	-	inside	70378	65098	NearestLocation	CAB39L
chr14	37274340	37274740	401	*	4.89851	4.29041	5.32497	-0.936831	0.00344902	0.0120188	1383	ENSG00000258601	37278076	37297934	+	upstream	-3736	3336	NearestLocation	NA
chr11	43768967	43769367	401	*	4.44914	3.63833	4.96509	-1.13686	0.00345971	0.0120291	799	ENSG00000254512	43755309	43756114	+	downstream	13658	12853	NearestLocation	NA
chrX	44819519	44819919	401	*	3.5169	2.15147	4.20564	-1.46347	0.00345983	0.0120291	4629	ENSG00000252113	44744751	44744811	+	downstream	74768	74708	NearestLocation	RNU6-523P
chr16	66442471	66442871	401	*	4.94264	4.35423	5.35941	-0.916147	0.00345999	0.0120291	1720	ENSG00000246898	66442427	66446038	+	inside	44	44	NearestLocation	NA
chr9	84295497	84295897	401	*	4.11265	3.15004	4.68493	-1.25183	0.0034623	0.0120291	4496	ENSG00000196781	84198598	84304220	-	inside	8723	8323	NearestLocation	TLE1
chr4	97519603	97520003	401	*	3.89664	2.83276	4.50228	-1.3181	0.00346678	0.0120357	3208	ENSG00000201640	97269889	97270189	-	upstream	-249414	249414	NearestLocation	NA
chr18	19745256	19745656	401	*	4.58655	3.83187	5.0795	-1.08528	0.00347494	0.0120551	1966	ENSG00000266010	19746859	19748929	-	downstream	3673	1203	NearestLocation	GATA6-AS1
chr1	173793459	173793859	401	*	5.12237	4.58719	5.51186	-0.854312	0.00348141	0.0120647	327	ENSG00000120334	173768688	173793858	-	overlapStart	399	1	NearestLocation	CENPL
chr5	67256821	67257221	401	*	4.20846	3.29236	4.76433	-1.21942	0.00348295	0.0120647	3448	ENSG00000223149	67263273	67263379	+	upstream	-6452	6052	NearestLocation	NA
chr8	81784771	81785171	401	*	4.84636	4.22227	5.28057	-0.95677	0.00348547	0.0120647	4305	ENSG00000164684	81540686	81787016	-	inside	2245	1845	NearestLocation	ZNF704
chr4	139832055	139832455	401	*	3.38724	1.83455	4.11767	-1.52411	0.00350324	0.0121172	3266	ENSG00000250577	139845084	139845386	-	downstream	13331	12629	NearestLocation	NA
chr8	61679818	61680218	401	*	3.51356	2.15433	4.20081	-1.46129	0.00352469	0.0121824	4282	ENSG00000254432	61721294	61722165	-	downstream	42347	41076	NearestLocation	NA
chr4	129689486	129689886	401	*	3.38451	1.83098	4.1151	-1.52288	0.0035369	0.0122155	3262	ENSG00000238802	129677181	129677284	+	downstream	12305	12202	NearestLocation	NA
chr12	112450742	112451142	401	*	4.58204	3.82919	5.07423	-1.08302	0.00359547	0.0124086	1166	ENSG00000089248	112451120	112461255	+	overlapStart	-378	22	NearestLocation	ERP29
chr5	128713150	128713550	401	*	4.51298	3.73739	5.01465	-1.10372	0.0036108	0.0124475	3551	ENSG00000265691	128732755	128732840	-	downstream	19690	19205	NearestLocation	MIR4460
chr6	125876332	125876732	401	*	4.00299	3.0017	4.58838	-1.2761	0.00361215	0.0124475	3859	ENSG00000228704	125746773	125766329	-	upstream	-110003	110003	NearestLocation	NA
chr5	86082869	86083269	401	*	3.77371	2.64139	4.40021	-1.35785	0.00361473	0.0124475	3481	ENSG00000248701	86093502	86096097	+	upstream	-10633	10233	NearestLocation	NA
chr8	25165526	25165926	401	*	3.88872	2.83098	4.49243	-1.31404	0.00361821	0.0124503	4232	ENSG00000147437	25276776	25282170	-	downstream	116644	110850	NearestLocation	GNRH1
chr15	62942404	62942804	401	*	4.89306	4.28976	5.31718	-0.934444	0.00363181	0.0124878	1561	ENSG00000259458	62929371	62937490	-	upstream	-4914	4914	NearestLocation	MGC15885
chr6	163723251	163723651	401	*	3.99941	2.99851	4.58467	-1.27518	0.00363641	0.012494	3940	ENSG00000217514	163784242	163784495	+	upstream	-60991	60591	NearestLocation	RPL37AP4
chr1	33895922	33896322	401	*	4.51521	3.73834	5.0174	-1.1041	0.00364228	0.012494	93	ENSG00000134686	33789224	33896653	-	inside	731	331	NearestLocation	PHC2
chr12	89746255	89746655	401	*	5.19863	4.68871	5.57463	-0.823022	0.00364236	0.012494	1117	ENSG00000139318	89741009	89747048	-	inside	793	393	NearestLocation	DUSP6
chr18	46014878	46015278	401	*	6.37628	6.07928	6.62246	-0.526948	0.00364569	0.012494	2007	ENSG00000266984	46004932	46005599	+	downstream	9946	9279	NearestLocation	NA
chr17	19352138	19352538	401	*	3.22335	0	4.1526	-1.54167	0.00364698	0.012494	1830	ENSG00000189343	19349246	19350169	-	upstream	-1969	1969	NearestLocation	RPS2P46
chr16	14723856	14724256	401	*	3.99703	3.00011	4.58096	-1.27417	0.003656	0.0125157	1663	ENSG00000140694	14529558	14726585	-	inside	2729	2329	NearestLocation	PARN
chr5	9624296	9624696	401	*	4.98768	4.41773	5.39515	-0.896004	0.00366118	0.0125242	3368	ENSG00000248525	9621489	9658570	-	inside	34274	2807	NearestLocation	NA
chr9	26892235	26892635	401	*	4.09814	3.1529	4.66437	-1.23845	0.00367407	0.0125553	4443	ENSG00000120159	26840683	26892802	-	inside	567	167	NearestLocation	CAAP1
chr6	167104647	167105047	401	*	3.88829	2.82919	4.49243	-1.31313	0.00367563	0.0125553	3950	ENSG00000235008	167114582	167116327	-	downstream	11680	9535	NearestLocation	NA
chr12	71277617	71278017	401	*	4.24011	3.29236	4.80723	-1.23787	0.00370681	0.0126525	1095	ENSG00000207387	71300697	71300798	+	upstream	-23080	22680	NearestLocation	NA
chr6	27806169	27806569	401	*	4.29376	3.41355	4.83648	-1.18741	0.00371046	0.0126557	3709	ENSG00000233822	27806323	27823487	+	overlapStart	-154	154	NearestLocation	H2BC15
chr1	1624299	1624699	401	*	4.10203	3.1529	4.66963	-1.23871	0.00373461	0.0127198	5	ENSG00000189339	1592939	1624167	-	upstream	-132	132	NearestLocation	SLC35E2B
chr10	55198826	55199226	401	*	3.63509	2.41594	4.28628	-1.39546	0.00373742	0.0127198	569	ENSG00000252161	55217957	55218048	+	upstream	-19131	18731	NearestLocation	RNA5SP318
chr4	9748428	9748828	401	*	3.63509	2.41594	4.28628	-1.39546	0.00373742	0.0127198	3097	ENSG00000250425	9756522	9757402	+	upstream	-8094	7694	NearestLocation	OR7E35P
chr16	30560246	30560646	401	*	3.63151	2.41594	4.28172	-1.39476	0.00374777	0.0127379	1680	ENSG00000260869	30545548	30569600	-	inside	9354	8954	NearestLocation	NA
chr3	38765616	38766016	401	*	4.19141	3.29106	4.74156	-1.20514	0.0037482	0.0127379	2842	ENSG00000185313	38738293	38835501	-	inside	69885	27323	NearestLocation	SCN10A
chr2	152613237	152613637	401	*	4.44118	3.63833	4.95394	-1.12508	0.00379587	0.0128905	2393	ENSG00000183091	152341850	152591001	-	upstream	-22236	22236	NearestLocation	NEB
chr2	152613237	152613637	401	*	4.44118	3.63833	4.95394	-1.12508	0.00379587	0.0128905	2393	LRG_202	152341853	152591001	-	upstream	-22236	22236	NearestLocation	NA
chr19	36248855	36249255	401	*	3.76121	2.63526	4.38582	-1.34588	0.00380973	0.0129282	2101	ENSG00000004776	36245469	36248980	-	overlapStart	125	125	NearestLocation	HSPB6
chr2	122288335	122288735	401	*	6.23362	5.91844	6.49213	-0.551514	0.003818	0.0129468	2360	ENSG00000264229	122288457	122288583	+	includeFeature	-122	122	NearestLocation	RNU4ATAC
chr7	10979510	10979910	401	*	4.64496	3.9197	5.12534	-1.05459	0.0038252	0.0129618	3972	ENSG00000189043	10971578	10979883	-	overlapStart	373	27	NearestLocation	NDUFA4
chr19	45393576	45393976	401	*	3.87545	2.83098	4.47493	-1.30125	0.00382814	0.0129623	2124	ENSG00000130204	45393826	45406946	+	overlapStart	-250	150	NearestLocation	TOMM40
chr15	65094105	65094505	401	*	4.83899	4.22295	5.26931	-0.945742	0.00383784	0.0129858	1569	ENSG00000140451	65107831	65117867	-	downstream	23762	13326	NearestLocation	PIF1
chr2	169934306	169934706	401	*	3.87847	2.83098	4.47893	-1.30162	0.00384298	0.0129937	2426	ENSG00000073737	169921299	169952677	+	inside	13007	13007	NearestLocation	DHRS9
chr6	140069814	140070214	401	*	5.11381	4.58613	5.49933	-0.844033	0.00385844	0.0130365	3890	ENSG00000205695	139981065	139982650	+	downstream	88749	87164	NearestLocation	LOC100129554
chr2	65230083	65230483	401	*	4.74027	4.07777	5.19257	-0.992251	0.00386214	0.0130396	2273	ENSG00000252892	65221880	65221994	+	downstream	8203	8089	NearestLocation	RNU6-548P
chr18	12361752	12362152	401	*	4.36345	3.53197	4.88757	-1.14868	0.00386698	0.0130465	1958	ENSG00000141385	12328943	12377313	-	inside	15561	15161	NearestLocation	AFG3L2
chr17	45286514	45286914	401	*	5.23871	4.73739	5.61003	-0.808711	0.00387098	0.0130506	1868	ENSG00000198336	45277812	45301045	+	inside	8702	8702	NearestLocation	MYL4
chr2	161840901	161841301	401	*	3.87804	2.82919	4.47893	-1.30095	0.00388987	0.0131048	2411	ENSG00000232337	161905117	161907057	-	downstream	66156	63816	NearestLocation	LOC100131736
chr19	56904727	56905127	401	*	4.19419	3.29236	4.74489	-1.20407	0.00389647	0.013113	2152	ENSG00000267454	56905025	56910541	+	overlapStart	-298	102	NearestLocation	ZNF582-AS1
chr3	36974396	36974796	401	*	5.635	5.22159	5.95595	-0.699043	0.00389791	0.013113	2832	ENSG00000168016	36868311	36986548	-	inside	12152	11752	NearestLocation	TRANK1
chrX	129299522	129299922	401	*	3.75557	2.63935	4.37728	-1.34291	0.0039102	0.0131448	4650	ENSG00000156709	129263337	129299861	-	overlapStart	339	61	NearestLocation	AIFM1
chr2	160600980	160601380	401	*	4.20087	3.29106	4.75447	-1.21155	0.00394015	0.013236	2408	ENSG00000136536	160569000	160627538	+	inside	31980	26158	NearestLocation	MARCHF7
chr14	23947538	23947938	401	*	3.19254	0	4.12023	-1.52734	0.00395661	0.0132815	1366	ENSG00000129460	23938897	23979071	+	inside	8641	8641	NearestLocation	NGDN
chr2	19024129	19024529	401	*	4.10295	3.15147	4.67137	-1.23631	0.00395939	0.0132815	2190	ENSG00000224626	18966073	18969018	+	downstream	58056	55111	NearestLocation	NA
chr4	16130984	16131384	401	*	4.83743	4.22295	5.267	-0.944516	0.0039858	0.0133605	3102	ENSG00000007062	15964699	16086001	-	upstream	-44983	44983	NearestLocation	PROM1
chr12	43855920	43856320	401	*	3.98472	3.00011	4.56451	-1.25981	0.00400032	0.013387	1039	ENSG00000173157	43747669	43945724	-	inside	89804	89404	NearestLocation	ADAMTS20
chr2	30790148	30790548	401	*	3.98472	3.00011	4.56451	-1.25981	0.00400032	0.013387	2212	ENSG00000172954	30670092	30867091	+	inside	120056	76543	NearestLocation	LCLAT1
chr11	134660978	134661378	401	*	4.36067	3.52976	4.88456	-1.14675	0.00400234	0.013387	955	ENSG00000251226	134605490	134633704	+	downstream	55488	27274	NearestLocation	LINC02714
chr7	55375888	55376288	401	*	3.87241	2.83098	4.47092	-1.29768	0.00402132	0.0134409	4037	ENSG00000230936	55410009	55412651	+	upstream	-34121	33721	NearestLocation	LOC100129276
chr16	88337630	88338030	401	*	3.99961	3.00487	4.58282	-1.26895	0.00403282	0.0134697	1765	ENSG00000261273	88268391	88336117	+	downstream	69239	1513	NearestLocation	NA
chr5	66342118	66342518	401	*	3.98652	3.0017	4.56639	-1.25945	0.00404852	0.0134962	3446	ENSG00000229666	66297211	66299781	-	upstream	-42337	42337	NearestLocation	NA
chr10	63775760	63776160	401	*	3.49238	2.15433	4.17445	-1.44054	0.00404944	0.0134962	576	ENSG00000221272	63686695	63686777	-	upstream	-88983	88983	NearestLocation	NA
chr16	28936316	28936716	401	*	3.49238	2.15433	4.17445	-1.44054	0.00404944	0.0134962	1674	ENSG00000177455	28943260	28950667	+	upstream	-6944	6544	NearestLocation	CD19
chr16	28936316	28936716	401	*	3.49238	2.15433	4.17445	-1.44054	0.00404944	0.0134962	1674	LRG_35	28943260	28950668	+	upstream	-6944	6544	NearestLocation	NA
chr4	121387498	121387898	401	*	3.36132	1.83098	4.08711	-1.50158	0.00405461	0.0135008	3247	ENSG00000225665	121263211	121263802	+	downstream	124287	123696	NearestLocation	NA
chr1	228556824	228557224	401	*	5.31	4.83142	5.66875	-0.781499	0.00405662	0.0135008	430	ENSG00000270104	228571815	228572717	-	downstream	15893	14591	NearestLocation	NA
chr4	127582410	127582810	401	*	4.68332	4.00011	5.14508	-1.01464	0.00406124	0.0135066	3258	ENSG00000223620	127484664	127485931	+	downstream	97746	96479	NearestLocation	NA
chr3	33155420	33155820	401	*	3.49773	2.15147	4.18182	-1.4404	0.00409076	0.0135888	2825	LRG_4	33155450	33189265	+	overlapStart	-30	30	NearestLocation	NA
chr2	25415306	25415706	401	*	3.49829	2.15433	4.18182	-1.44033	0.00409178	0.0135888	2199	ENSG00000230452	25427182	25432071	+	upstream	-11876	11476	NearestLocation	LINC01381
chr6	16109194	16109594	401	*	3.15612	0.823805	4.00526	-1.58872	0.00409694	0.0135963	3680	ENSG00000217585	16107853	16108824	+	downstream	1341	370	NearestLocation	NA
chr3	69922204	69922604	401	*	4.50368	3.73834	5.0011	-1.09017	0.00411077	0.0136325	2900	ENSG00000265722	69969276	69969361	+	upstream	-47072	46672	NearestLocation	NA
chr2	138686664	138687064	401	*	4.83688	4.22363	5.26585	-0.943532	0.00412196	0.0136599	2381	ENSG00000234007	138636324	138683977	-	upstream	-2687	2687	NearestLocation	NA
chr10	111985420	111985820	401	*	3.48983	2.15147	4.17198	-1.43817	0.00414557	0.0137217	686	ENSG00000228417	111967608	111968349	-	upstream	-17071	17071	NearestLocation	NA
chr6	53918828	53919228	401	*	5.02242	4.47397	5.41884	-0.867173	0.00414651	0.0137217	3750	ENSG00000235050	53893975	53944524	-	inside	25696	24853	NearestLocation	NA
chr1	88937969	88938369	401	*	5.54267	5.11546	5.87185	-0.718642	0.00415549	0.0137417	198	ENSG00000239504	88943514	88943797	-	downstream	5828	5145	NearestLocation	RN7SL583P
chr1	8766999	8767399	401	*	5.66074	5.25741	5.9756	-0.683606	0.00415847	0.0137418	23	ENSG00000234619	8810489	8811146	+	upstream	-43490	43090	NearestLocation	RPL7P11
chr22	21526820	21527220	401	*	5.11647	4.58825	5.50228	-0.843336	0.0041788	0.0137992	2714	ENSG00000215498	21522047	21546445	+	inside	4773	4773	NearestLocation	FAM230B
chr12	90169200	90169600	401	*	3.20224	0	4.13043	-1.51455	0.00418549	0.0138115	1119	ENSG00000252823	90147836	90147929	+	downstream	21364	21271	NearestLocation	RNU6-148P
chr4	114683830	114684230	401	*	4.50466	3.73834	5.00249	-1.08992	0.00418963	0.0138154	3237	ENSG00000145349	114372188	114683083	-	upstream	-747	747	NearestLocation	CAMK2D
chr2	133672239	133672639	401	*	4.08573	3.15433	4.64708	-1.22188	0.00421033	0.0138739	2375	ENSG00000233729	133673130	133689067	+	upstream	-891	491	NearestLocation	NCKAP5-AS1
chr5	145439012	145439412	401	*	4.08273	3.1529	4.64352	-1.22114	0.00421937	0.0138938	3580	ENSG00000251556	145478969	145499975	+	upstream	-39957	39557	NearestLocation	NA
chr14	77519389	77519789	401	*	3.98271	3.00328	4.56075	-1.25592	0.00423651	0.0139404	1446	ENSG00000246548	77507407	77535846	+	inside	11982	11982	NearestLocation	LINC02288
chr19	48170809	48171209	401	*	3.74219	2.63731	4.36049	-1.3283	0.00424328	0.0139529	2130	ENSG00000269806	48118956	48129652	-	upstream	-41157	41157	NearestLocation	NA
chr15	100208911	100209311	401	*	4.08704	3.15433	4.64885	-1.22158	0.00426682	0.0140204	1639	ENSG00000201724	100221991	100222082	-	downstream	13171	12680	NearestLocation	NA
chr10	87783872	87784272	401	*	5.31192	4.83053	5.67225	-0.781524	0.00427534	0.0140385	626	ENSG00000200487	87812205	87812323	+	upstream	-28333	27933	NearestLocation	RNA5SP322
chr6	167551416	167551816	401	*	3.74385	2.63731	4.36265	-1.32781	0.00429201	0.0140833	3952	ENSG00000166984	167559902	167610401	+	upstream	-8486	8086	NearestLocation	NA
chr6	162869331	162869731	401	*	3.61381	2.41594	4.25913	-1.37505	0.00429545	0.0140847	3936	ENSG00000227913	162989411	162990760	+	upstream	-120080	119680	NearestLocation	KRT8P44
chr6	123627547	123627947	401	*	5.86348	5.5027	6.15185	-0.625387	0.0043091	0.0141196	3851	ENSG00000235535	123732857	123792904	+	upstream	-105310	104910	NearestLocation	NA
chr8	9152631	9153031	401	*	4.50536	3.73739	5.00388	-1.08925	0.00433482	0.0141882	4196	ENSG00000207415	9144982	9145088	-	upstream	-7543	7543	NearestLocation	RNU6-1151P
chr3	124487765	124488165	401	*	3.61563	2.41594	4.26145	-1.37458	0.00433613	0.0141882	2967	ENSG00000244286	124500002	124506604	+	upstream	-12237	11837	NearestLocation	NA
chr5	14908324	14908724	401	*	4.78096	4.15219	5.21741	-0.955982	0.00434052	0.0141924	3381	ENSG00000212036	14910667	14910749	-	downstream	2425	1943	NearestLocation	MIR548BA
chr11	75365154	75365554	401	*	3.74314	2.64139	4.36049	-1.32665	0.0043435	0.0141924	848	ENSG00000255280	75353645	75353934	+	downstream	11509	11220	NearestLocation	NA
chr5	44645635	44646035	401	*	4.83079	4.22363	5.2568	-0.933738	0.00436242	0.0142443	3415	ENSG00000250418	44698533	44700910	-	downstream	55275	52498	NearestLocation	NA
chr9	113472696	113473096	401	*	4.08142	3.1529	4.64174	-1.21906	0.004367	0.0142476	4557	ENSG00000223918	113489736	113489959	-	downstream	17263	16640	NearestLocation	RPS21P5
chr12	106375755	106376155	401	*	4.78304	4.15362	5.2198	-0.95625	0.00437245	0.0142476	1151	ENSG00000257773	106409675	106410784	+	upstream	-33920	33520	NearestLocation	NA
chr16	30429082	30429482	401	*	4.50494	3.7393	5.00249	-1.08845	0.00437327	0.0142476	1679	ENSG00000199787	30430946	30431080	-	downstream	1998	1464	NearestLocation	SNORA80C
chr21	45158411	45158811	401	*	5.2325	4.73787	5.60016	-0.798974	0.00437567	0.0142476	2690	ENSG00000160209	45138975	45182188	+	inside	19436	19436	NearestLocation	LOC105372824;PDXK
chr5	96451591	96451991	401	*	3.7372	2.63731	4.35398	-1.3251	0.0043949	0.0143003	3498	ENSG00000145721	96427574	96478576	-	inside	26985	24017	NearestLocation	LIX1
chr5	149187807	149188207	401	*	3.74551	2.63731	4.36481	-1.32644	0.00439979	0.0143022	3595	ENSG00000199047	149112388	149112453	+	downstream	75419	75354	NearestLocation	MIR378A
chr2	74710055	74710455	401	*	3.86096	2.83276	4.45519	-1.28283	0.004405	0.0143022	2291	ENSG00000115282	74710200	74722013	+	overlapStart	-145	145	NearestLocation	TTC31
chr8	22395630	22396030	401	*	4.67568	4.00011	5.13398	-1.00363	0.00440504	0.0143022	4227	ENSG00000120896	22402499	22433301	+	upstream	-6869	6469	NearestLocation	SORBS3
chr3	45187455	45187855	401	*	3.16106	0	4.08711	-1.50721	0.00440774	0.0143022	2851	ENSG00000163814	45123770	45187914	-	inside	459	59	NearestLocation	CDCP1
chr5	62182864	62183264	401	*	4.83102	4.22431	5.2568	-0.933455	0.00441612	0.0143194	3438	ENSG00000217416	62072704	62073090	-	upstream	-109774	109774	NearestLocation	NA
chr12	14922840	14923240	401	*	4.72838	4.07928	5.17445	-0.978379	0.00441969	0.014321	993	ENSG00000197837	14920933	14924065	-	inside	1225	825	NearestLocation	H4-16
chr15	57794398	57794798	401	*	4.26543	3.41713	4.79606	-1.15846	0.00443185	0.0143437	1552	ENSG00000261489	57769682	57770527	-	upstream	-23871	23871	NearestLocation	NA
chr10	65281622	65282022	401	*	3.22432	1.41355	4.00249	-1.54466	0.00443284	0.0143437	580	ENSG00000165476	65281123	65384883	+	inside	499	499	NearestLocation	REEP3
chr7	23145207	23145607	401	*	4.0846	3.15004	4.64708	-1.21943	0.00444079	0.0143595	3984	ENSG00000230658	23140847	23145322	-	overlapStart	115	115	NearestLocation	NA
chr6	26240355	26240755	401	*	4.42594	3.63833	4.93254	-1.1082	0.00444898	0.014376	3701	ENSG00000198327	26240561	26240976	+	overlapStart	-206	194	NearestLocation	NA
chr1	44527595	44527995	401	*	3.60835	2.41594	4.25214	-1.37111	0.00447287	0.0144432	113	ENSG00000230615	44501798	44570647	+	inside	25797	25797	NearestLocation	NA
chr3	101659488	101659888	401	*	4.62673	3.91802	5.09988	-1.03758	0.00448435	0.0144645	2936	ENSG00000214407	101659703	101716770	+	overlapStart	-215	185	NearestLocation	LINC02085
chr11	27361406	27361806	401	*	4.92568	4.35485	5.3336	-0.892885	0.00448568	0.0144645	776	ENSG00000109881	27352374	27385415	-	inside	24009	9032	NearestLocation	CCDC34
chr1	39679680	39680080	401	*	4.88323	4.28911	5.30283	-0.920562	0.00451283	0.014542	100	ENSG00000270040	39672184	39672629	+	downstream	7496	7051	NearestLocation	NA
chr4	7957207	7957607	401	*	3.86358	2.83098	4.45925	-1.28172	0.00453884	0.0146158	3094	ENSG00000196526	7760441	7941653	-	upstream	-15554	15554	NearestLocation	AFAP1
chr5	36652142	36652542	401	*	3.86937	2.83098	4.46691	-1.28922	0.00455621	0.0146616	3403	ENSG00000079215	36606457	36688436	+	inside	45685	35894	NearestLocation	SLC1A3
chr10	134444808	134445208	401	*	4.92401	4.35423	5.33139	-0.892153	0.00458104	0.0147313	720	ENSG00000068383	134351324	134596979	+	inside	93484	93484	NearestLocation	INPP5A
chr2	62899796	62900196	401	*	5.6298	5.22397	5.94617	-0.684587	0.00460163	0.0147689	2271	ENSG00000115504	62900986	63273622	+	upstream	-1190	790	NearestLocation	EHBP1
chr2	37733707	37734107	401	*	3.86139	2.83455	4.45519	-1.28015	0.00460188	0.0147689	2226	ENSG00000253078	37662653	37662751	-	upstream	-70956	70956	NearestLocation	RNU6-1116P
chr19	5966130	5966530	401	*	3.86314	2.82919	4.45925	-1.28095	0.00460222	0.0147689	2057	ENSG00000031823	5916150	5978153	-	inside	12023	11623	NearestLocation	RANBP3
chr7	134571467	134571867	401	*	4.42742	3.63629	4.93545	-1.10777	0.00461458	0.0147984	4139	ENSG00000146856	134671259	134832715	+	upstream	-99792	99392	NearestLocation	AGBL3
chr21	39810305	39810705	401	*	3.34215	1.83098	4.06389	-1.48109	0.00461966	0.0148045	2677	ENSG00000231480	39874369	39874545	+	upstream	-64064	63664	NearestLocation	NA
chr4	74124639	74125039	401	*	4.19835	3.28976	4.75151	-1.19789	0.00463513	0.0148439	3169	ENSG00000250220	74124926	74183670	+	overlapStart	-287	113	NearestLocation	NA
chr6	53883465	53883865	401	*	4.49178	3.73739	4.98462	-1.07611	0.0046456	0.0148672	3749	ENSG00000218143	53881277	53881575	-	upstream	-1890	1890	NearestLocation	NA
chr19	9737030	9737430	401	*	5.18592	4.68822	5.55527	-0.803252	0.00465272	0.0148798	2063	ENSG00000171469	9715356	9732075	-	upstream	-4955	4955	NearestLocation	ZNF561
chr7	49905588	49905988	401	*	3.96763	2.99851	4.54216	-1.24077	0.00467171	0.0149242	4030	ENSG00000223893	49981847	49984036	-	downstream	78448	75859	NearestLocation	GNL2P1
chr5	80778461	80778861	401	*	3.47087	2.15433	4.14759	-1.41904	0.00467299	0.0149242	3473	ENSG00000172497	80625824	80689998	-	upstream	-88463	88463	NearestLocation	ACOT12
chr15	41836289	41836689	401	*	3.47488	2.15433	4.1526	-1.41898	0.00470191	0.0149904	1523	ENSG00000103932	41809374	41836467	-	overlapStart	178	178	NearestLocation	RPAP1
chr1	214776111	214776511	401	*	4.49305	3.73834	4.98602	-1.07601	0.00470319	0.0149904	407	ENSG00000117724	214776538	214837931	+	upstream	-427	27	NearestLocation	CENPF
chr15	70962274	70962674	401	*	5.95413	5.61142	6.23086	-0.595405	0.00470637	0.0149904	1592	ENSG00000259227	70894463	70894855	+	downstream	67811	67419	NearestLocation	NA
chr10	77495325	77495725	401	*	4.61788	3.91802	5.08711	-1.02707	0.00471142	0.0149904	609	ENSG00000228280	77502498	77503513	+	upstream	-7173	6773	NearestLocation	NA
chr9	112580079	112580479	401	*	4.07113	3.1529	4.62778	-1.20603	0.00471182	0.0149904	4553	ENSG00000241978	112542769	112934792	+	inside	37310	37310	NearestLocation	NA
chr4	25350748	25351148	401	*	3.9656	3.0017	4.53833	-1.23951	0.00471302	0.0149904	3115	ENSG00000264496	25355592	25355693	+	upstream	-4844	4444	NearestLocation	NA
chr16	54212359	54212759	401	*	5.88365	5.53142	6.16654	-0.61254	0.00474538	0.0150831	1696	ENSG00000259759	54273605	54274566	+	upstream	-61246	60846	NearestLocation	NA
chr5	140027287	140027687	401	*	4.34768	3.53307	4.86515	-1.12916	0.00476061	0.0151122	3574	ENSG00000131495	140018325	140027370	-	overlapStart	83	83	NearestLocation	NDUFA2
chr1	35128574	35128974	401	*	3.13576	0	4.06123	-1.49319	0.00476102	0.0151122	94	ENSG00000207941	35135200	35135295	-	downstream	6721	6226	NearestLocation	MIR552
chr14	104625111	104625511	401	*	4.16451	3.28976	4.70519	-1.17395	0.00476866	0.0151262	1482	ENSG00000066735	104605060	104647231	+	inside	20051	20051	NearestLocation	KIF26A
chr2	88205690	88206090	401	*	4.17837	3.28715	4.72517	-1.18462	0.00477431	0.0151338	2306	ENSG00000225428	88268128	88268490	+	upstream	-62438	62038	NearestLocation	NDUFB4P7
chr9	139691226	139691626	401	*	4.16575	3.28976	4.7069	-1.17404	0.00479682	0.0151872	4603	ENSG00000213213	139690802	139702193	+	inside	424	424	NearestLocation	CCDC183
chr9	99697039	99697439	401	*	3.47345	2.15719	4.1501	-1.4168	0.00479768	0.0151872	4534	ENSG00000188152	99690592	99702535	+	inside	6447	5096	NearestLocation	NUTM2G
chr6	160114331	160114731	401	*	4.07246	3.1529	4.62957	-1.20541	0.00480569	0.0152023	3930	ENSG00000220305	160133833	160135017	-	downstream	20686	19102	NearestLocation	HNRNPH1P1
chr14	56023899	56024299	401	*	4.16327	3.28976	4.70348	-1.17316	0.0048136	0.0152139	1404	ENSG00000126777	56025790	56168244	+	upstream	-1891	1491	NearestLocation	KTN1
chr12	114886290	114886690	401	*	3.47145	2.15719	4.14759	-1.41619	0.00481589	0.0152139	1171	ENSG00000089225	114791736	114846247	-	upstream	-40043	40043	NearestLocation	TBX5
chr18	13944678	13945078	401	*	3.47688	2.15433	4.1551	-1.4169	0.00482234	0.015224	1963	ENSG00000243779	13919602	13919922	-	upstream	-24756	24756	NearestLocation	RPL36AP49
chr11	80534699	80535099	401	*	4.26311	3.41713	4.79285	-1.15389	0.00484035	0.015261	865	ENSG00000255178	80462243	80473869	-	upstream	-60830	60830	NearestLocation	LINC02720
chr1	149814311	149814711	401	*	4.62421	3.91802	5.09624	-1.02874	0.00484061	0.015261	269	ENSG00000220323	149814608	149815100	+	overlapStart	-297	103	NearestLocation	H2BC19P
chr11	2799770	2800170	401	*	3.72293	2.63935	4.33471	-1.3086	0.00485917	0.0153092	730	ENSG00000236041	2792586	2792807	+	downstream	7184	6963	NearestLocation	COX6CP18
chr8	32986954	32987354	401	*	3.72413	2.63731	4.33691	-1.30861	0.00488094	0.0153671	4241	ENSG00000265562	33053355	33053455	+	upstream	-66401	66001	NearestLocation	NA
chr22	46942612	46943012	401	*	3.72461	2.63935	4.33691	-1.30852	0.00488414	0.0153671	2777	ENSG00000234869	46937392	46944093	+	inside	5220	1081	NearestLocation	NA
chr14	39736092	39736492	401	*	3.72124	2.63935	4.3325	-1.30793	0.00488775	0.0153681	1386	ENSG00000258940	39734907	39736265	-	overlapStart	173	173	NearestLocation	LOC100288846
chr4	8594268	8594668	401	*	4.55313	3.83098	5.03216	-1.04506	0.00490354	0.0154074	3095	ENSG00000109625	8594387	8621488	+	overlapStart	-119	119	NearestLocation	CPZ
chr11	65239613	65240013	401	*	3.96377	3.00011	4.53642	-1.23691	0.0049122	0.0154242	833	ENSG00000173727	65222728	65234028	+	downstream	16885	5585	NearestLocation	NA
chr15	41860617	41861017	401	*	4.46974	3.64037	4.99302	-1.13653	0.00491901	0.0154352	1525	ENSG00000092445	41849873	41871536	+	inside	10744	10519	NearestLocation	TYRO3
chr1	217627212	217627612	401	*	5.50336	5.08003	5.83024	-0.71239	0.00492736	0.015451	411	ENSG00000229841	217665317	217667625	+	upstream	-38105	37705	NearestLocation	NA
chr7	77975265	77975665	401	*	4.68003	4.00011	5.1403	-1.00234	0.00493405	0.0154596	4060	ENSG00000231322	77976459	77988775	+	upstream	-1194	794	NearestLocation	RPL13AP17
chr5	89561034	89561434	401	*	4.16203	3.28976	4.70178	-1.17164	0.00493675	0.0154596	3485	ENSG00000248555	89454156	89585888	-	inside	24854	24454	NearestLocation	LINC01339
chr7	33846389	33846789	401	*	4.16239	3.29106	4.70178	-1.17151	0.00494426	0.0154728	3998	ENSG00000236494	33832780	33842768	-	upstream	-3621	3621	NearestLocation	NA
chr10	108582804	108583204	401	*	3.59221	2.41594	4.23145	-1.35391	0.0049628	0.0155204	684	ENSG00000200626	108729779	108729908	+	upstream	-146975	146575	NearestLocation	RNA5SP325
chr6	144822001	144822401	401	*	3.84078	2.83098	4.429	-1.26458	0.00496634	0.0155211	3905	ENSG00000219409	144719095	144719888	+	downstream	102906	102113	NearestLocation	LOC100420214
chr12	59207849	59208249	401	*	3.84388	2.83098	4.43312	-1.26503	0.00497787	0.0155417	1075	ENSG00000257259	58959743	59175529	-	upstream	-32320	32320	NearestLocation	LINC02388
chr6	126444340	126444740	401	*	3.59405	2.41594	4.23382	-1.3539	0.0049796	0.0155417	3861	ENSG00000231842	126498339	126523385	+	upstream	-53999	53599	NearestLocation	NA
chr4	113592244	113592644	401	*	3.59036	2.41594	4.22908	-1.35304	0.00500139	0.0155888	3233	ENSG00000220924	113606211	113606659	+	upstream	-13967	13567	NearestLocation	NA
chr6	105335236	105335636	401	*	3.59036	2.41594	4.22908	-1.35304	0.00500139	0.0155888	3814	ENSG00000271099	105308324	105309998	+	downstream	26912	25238	NearestLocation	NA
chr18	4345760	4346160	401	*	3.59168	2.41355	4.23145	-1.35316	0.00501256	0.0156132	1940	ENSG00000261520	4264602	4295405	+	downstream	81158	50355	NearestLocation	DLGAP1-AS5
chr14	59824842	59825242	401	*	3.84344	2.82919	4.43312	-1.26441	0.0050334	0.0156631	1412	ENSG00000252869	59866741	59866869	+	upstream	-41899	41499	NearestLocation	NA
chr19	10443831	10444231	401	*	3.59458	2.41832	4.23382	-1.35298	0.00503528	0.0156631	2066	ENSG00000161847	10426888	10444316	-	inside	485	85	NearestLocation	RAVER1
chr9	89899950	89900350	401	*	3.84433	2.83276	4.43312	-1.2642	0.00504315	0.0156771	4512	ENSG00000212421	89875365	89875500	+	downstream	24585	24450	NearestLocation	NA
chr2	175304634	175305034	401	*	3.83923	2.83098	4.42693	-1.26323	0.0050518	0.0156935	2432	ENSG00000144306	175260458	175294303	+	downstream	44176	10331	NearestLocation	SCRN3
chr1	160001776	160002176	401	*	3.59089	2.41832	4.22908	-1.35212	0.00505696	0.0156991	292	ENSG00000143315	159997462	160001783	-	overlapStart	7	7	NearestLocation	PIGM
chr1	168482374	168482774	401	*	4.82665	4.22295	5.25097	-0.92929	0.00507104	0.0157323	315	ENSG00000237658	168433452	168464882	-	upstream	-17492	17492	NearestLocation	NA
chr5	73890936	73891336	401	*	5.43809	5.0009	5.77314	-0.72547	0.00507633	0.0157383	3463	ENSG00000049860	73935848	74018472	+	upstream	-44912	44512	NearestLocation	HEXB
chr6	27805084	27805484	401	*	4.91755	4.35423	5.32164	-0.881398	0.00508287	0.0157428	3708	ENSG00000184348	27805658	27806117	-	downstream	1033	174	NearestLocation	NA
chr2	4460292	4460692	401	*	4.25172	3.41713	4.77704	-1.14215	0.00508453	0.0157428	2166	ENSG00000231821	4561794	4562646	-	downstream	102354	101102	NearestLocation	NPM1P48
chr3	48157312	48157712	401	*	4.91923	4.35485	5.32386	-0.881662	0.00510918	0.0158086	2859	ENSG00000236768	48162159	48162705	-	downstream	5393	4447	NearestLocation	RPL17P16
chr11	94487531	94487931	401	*	3.59642	2.41832	4.23618	-1.35193	0.00512082	0.0158342	886	ENSG00000255929	94278496	94473521	-	upstream	-14010	14010	NearestLocation	LOC105369438
chr5	96478275	96478675	401	*	3.71738	2.63731	4.32808	-1.30408	0.00512761	0.0158446	3499	ENSG00000145721	96427574	96478576	-	overlapStart	301	99	NearestLocation	LIX1
chr9	2810176	2810576	401	*	4.6685	4.0017	5.12278	-0.990474	0.00514693	0.0158938	4416	ENSG00000080608	2720469	2844241	-	inside	34065	33665	NearestLocation	PUM3
chr7	107877400	107877800	401	*	3.95261	3.00011	4.52139	-1.22483	0.0051527	0.0159011	4098	ENSG00000091128	107663993	107770801	-	upstream	-106599	106599	NearestLocation	LAMB4
chr17	36616572	36616972	401	*	3.95158	3.0017	4.51945	-1.22417	0.00517916	0.0159624	1850	ENSG00000260833	36606638	36608688	-	upstream	-7884	7884	NearestLocation	NA
chr11	12013997	12014397	401	*	4.55901	3.82919	5.04137	-1.05154	0.00517941	0.0159624	748	ENSG00000050165	11984653	12031316	-	inside	17319	16919	NearestLocation	DKK3
chr7	44180781	44181181	401	*	4.25721	3.41594	4.78513	-1.14332	0.00518315	0.0159634	4016	ENSG00000106631	44178463	44180931	-	overlapStart	150	150	NearestLocation	MYL7
chr13	47096749	47097149	401	*	3.19665	1.41832	3.96936	-1.5182	0.00520904	0.0160294	1264	ENSG00000230243	47079253	47079571	+	downstream	17496	17178	NearestLocation	NA
chr20	51962842	51963242	401	*	3.59773	2.41594	4.23854	-1.35087	0.00521146	0.0160294	2638	ENSG00000231703	52014199	52029448	-	downstream	66606	50957	NearestLocation	NA
chr1	6259511	6259911	401	*	4.3341	3.53086	4.84703	-1.11517	0.00524244	0.0161035	13	ENSG00000158286	6265535	6281359	+	upstream	-6024	5624	NearestLocation	RNF207
chr6	77743886	77744286	401	*	4.3341	3.53086	4.84703	-1.11517	0.00524244	0.0161035	3776	ENSG00000271945	77484700	77485577	+	downstream	259186	258309	NearestLocation	NA
chr11	74527046	74527446	401	*	3.94973	3.00011	4.51751	-1.22297	0.00526577	0.0161578	844	ENSG00000242999	74556955	74557251	+	upstream	-29909	29509	NearestLocation	RN7SL239P
chr12	93841989	93842389	401	*	4.73508	4.07928	5.18427	-0.976639	0.00526759	0.0161578	1132	ENSG00000177889	93799449	93836038	-	upstream	-5951	5951	NearestLocation	UBE2N
chr2	227631792	227632192	401	*	5.67657	5.29008	5.9811	-0.659957	0.00527049	0.0161578	2533	ENSG00000169047	227596033	227664475	-	inside	32683	32283	NearestLocation	IRS1
chr9	93799504	93799904	401	*	3.58667	2.41594	4.22433	-1.34814	0.00528022	0.016177	4520	ENSG00000260454	93759336	93764153	+	downstream	40168	35351	NearestLocation	NA
chr1	187809713	187810113	401	*	5.00707	4.47455	5.39515	-0.845123	0.0052875	0.0161826	355	ENSG00000223847	187683374	187683866	-	upstream	-125847	125847	NearestLocation	NA
chr10	97226959	97227359	401	*	4.25322	3.41832	4.77866	-1.14074	0.00529075	0.0161826	651	ENSG00000095637	97071528	97321171	-	inside	94212	93812	NearestLocation	SORBS1
chr20	45987947	45988347	401	*	4.54933	3.83098	5.02671	-1.04121	0.00529324	0.0161826	2623	ENSG00000101040	45837859	45985567	-	upstream	-2380	2380	NearestLocation	ZMYND8
chr1	112102389	112102789	401	*	5.1758	4.68871	5.53929	-0.79231	0.00529594	0.0161826	227	ENSG00000121933	112025970	112106584	-	inside	4195	3795	NearestLocation	TMIGD3
chr2	111346030	111346430	401	*	5.39978	4.95965	5.73656	-0.734306	0.00538279	0.0164372	2345	ENSG00000183054	111271389	111334762	-	upstream	-11268	11268	NearestLocation	RGPD6
chr13	77193659	77194059	401	*	5.13635	4.63986	5.50502	-0.805885	0.00541226	0.0165164	1298	ENSG00000264908	77460456	77460535	-	downstream	266876	266397	NearestLocation	NA
chr7	101692979	101693379	401	*	3.44904	2.15433	4.12023	-1.39677	0.00541757	0.0165218	4087	ENSG00000272544	101676303	101677447	+	downstream	16676	15532	NearestLocation	NA
chr10	43872755	43873155	401	*	3.3138	1.83098	4.02944	-1.45592	0.00542502	0.0165251	546	ENSG00000150201	43867090	43871783	+	downstream	5665	972	NearestLocation	FXYD4
chr1	198241570	198241970	401	*	4.1498	3.28976	4.68493	-1.15726	0.00542572	0.0165251	364	ENSG00000232824	198166909	198167316	-	upstream	-74254	74254	NearestLocation	NA
chr5	36125936	36126336	401	*	4.15016	3.29106	4.68493	-1.15714	0.0054333	0.0165279	3401	ENSG00000207756	36147994	36148090	-	downstream	22154	21658	NearestLocation	MIR580
chr10	34917334	34917734	401	*	4.05448	3.15433	4.60456	-1.18765	0.00543425	0.0165279	535	ENSG00000229235	34952787	34953029	-	downstream	35695	35053	NearestLocation	RPL37P18
chr2	62364579	62364979	401	*	4.05276	3.1529	4.60273	-1.18733	0.00543728	0.0165279	2270	ENSG00000242735	62373548	62374288	+	upstream	-8969	8569	NearestLocation	NA
chr3	105167369	105167769	401	*	3.9487	3.0017	4.51556	-1.22064	0.00545066	0.0165578	2938	ENSG00000170017	105085753	105295744	+	inside	81616	81616	NearestLocation	ALCAM
chr4	24246740	24247140	401	*	4.07453	3.15576	4.63137	-1.19905	0.00547902	0.0166331	3112	ENSG00000222262	24422799	24422924	-	downstream	176184	175659	NearestLocation	NA
chr6	55124995	55125395	401	*	4.48064	3.7393	4.96794	-1.06015	0.00549552	0.0166711	3753	ENSG00000187871	55192267	55267291	+	upstream	-67272	66872	NearestLocation	GFRAL
chr7	157667912	157668312	401	*	3.88559	2.82919	4.48887	-1.28143	0.00549867	0.0166711	4176	ENSG00000272839	157661230	157661846	+	downstream	6682	6066	NearestLocation	NA
chr3	135043098	135043498	401	*	4.32548	3.53086	4.83492	-1.10414	0.00552686	0.0167357	2982	ENSG00000240086	135074909	135158730	-	downstream	115632	31411	NearestLocation	NA
chr19	16574793	16575193	401	*	3.45253	2.15147	4.12534	-1.39545	0.00552716	0.0167357	2083	ENSG00000127527	16466050	16582896	-	inside	8103	7703	NearestLocation	EPS15L1
chr11	74952881	74953281	401	*	4.24225	3.41594	4.76433	-1.12943	0.00553996	0.0167636	846	ENSG00000255136	74919099	74952218	-	upstream	-663	663	NearestLocation	NA
chr7	129093525	129093925	401	*	5.09135	4.5856	5.4651	-0.812414	0.00554643	0.0167723	4131	ENSG00000128578	129074274	129128240	+	inside	19251	19251	NearestLocation	STRIP2
chr3	193311060	193311460	401	*	4.23871	3.41594	4.75941	-1.12823	0.00555133	0.0167762	3074	ENSG00000198836	193310933	193415612	+	inside	127	127	NearestLocation	OPA1
chr3	193311060	193311460	401	*	4.23871	3.41594	4.75941	-1.12823	0.00555133	0.0167762	3074	LRG_337	193310933	193415600	+	inside	127	127	NearestLocation	NA
chr21	47548324	47548724	401	*	4.40657	3.63833	4.90519	-1.08147	0.00555794	0.0167853	2697	ENSG00000237338	47571528	47572561	+	upstream	-23204	22804	NearestLocation	FTCD-AS1
chr10	66267853	66268253	401	*	3.31156	1.83098	4.02671	-1.4528	0.00556181	0.0167862	582	ENSG00000233900	66380131	66380679	-	downstream	112826	111878	NearestLocation	RPL17P35
chr1	224691123	224691523	401	*	3.84852	2.83098	4.43929	-1.25916	0.00557292	0.0168032	421	ENSG00000162923	224572845	224624735	-	upstream	-66388	66388	NearestLocation	WDR26
chr20	6278660	6279060	401	*	4.40582	3.63935	4.90371	-1.08089	0.00557716	0.0168032	2565	ENSG00000221449	6209441	6209595	-	upstream	-69065	69065	NearestLocation	NA
chr6	64750444	64750844	401	*	3.70413	2.63731	4.3107	-1.28878	0.00557827	0.0168032	3760	ENSG00000219653	64567334	64567662	+	downstream	183110	182782	NearestLocation	NA
chr20	37740783	37741183	401	*	3.70242	2.63731	4.30845	-1.28846	0.00558248	0.0168051	2616	ENSG00000230324	37842420	37853391	-	downstream	112608	101237	NearestLocation	LINC01734
chr19	10340681	10341081	401	*	3.44438	2.15147	4.1151	-1.39272	0.00562356	0.0169178	2065	ENSG00000264266	10341089	10341161	+	upstream	-408	8	NearestLocation	MIR4322
chr5	141923711	141924111	401	*	3.70584	2.63731	4.31294	-1.28835	0.00563619	0.0169449	3577	ENSG00000252831	141913820	141913910	-	upstream	-9801	9801	NearestLocation	NA
chr4	148674190	148674590	401	*	4.05849	3.15433	4.61003	-1.18681	0.00564379	0.0169529	3286	ENSG00000252951	148666454	148666568	-	upstream	-7622	7622	NearestLocation	RNA5SP165
chr3	31051410	31051810	401	*	3.82549	2.83098	4.40862	-1.24639	0.00564612	0.0169529	2821	ENSG00000144644	30767692	30936257	-	upstream	-115153	115153	NearestLocation	GADL1
chr1	143941197	143941597	401	*	5.05214	4.53142	5.43395	-0.834968	0.00568295	0.0170525	247	ENSG00000196369	143913615	144094424	+	inside	27582	27582	NearestLocation	SRGAP2B
chr11	84530450	84530850	401	*	3.82347	2.82919	4.40652	-1.24558	0.00569803	0.0170735	869	ENSG00000254787	84431869	84511744	+	downstream	98581	18706	NearestLocation	NA
chr3	126658282	126658682	401	*	4.40237	3.63833	4.89924	-1.07901	0.00569914	0.0170735	2974	ENSG00000114554	126707437	126756235	+	upstream	-49155	48755	NearestLocation	PLXNA1
chr3	71591833	71592233	401	*	3.82235	2.83098	4.40442	-1.24518	0.00570341	0.0170735	2904	ENSG00000221264	71591121	71591240	-	upstream	-593	593	NearestLocation	MIR1284
chr1	154934004	154934404	401	*	3.82504	2.82919	4.40862	-1.24581	0.00570458	0.0170735	285	ENSG00000271380	154934301	154935099	+	overlapStart	-297	103	NearestLocation	LOC101928120
chr6	125661585	125661985	401	*	4.14765	3.29106	4.68146	-1.15401	0.00571866	0.0171047	3856	ENSG00000226409	125691357	125695470	-	downstream	33885	29372	NearestLocation	NA
chr1	216988188	216988588	401	*	4.54811	3.83008	5.02534	-1.03828	0.00573103	0.0171208	409	ENSG00000196482	216676588	217311097	-	inside	322909	311600	NearestLocation	ESRRG
chr5	156073610	156074010	401	*	4.07642	3.1529	4.63496	-1.19768	0.0057314	0.0171208	3603	ENSG00000254163	156131069	156166823	-	downstream	93213	57059	NearestLocation	NA
chr5	146787000	146787400	401	*	4.60028	3.91886	5.06123	-1.0026	0.00574742	0.0171577	3585	ENSG00000272239	146781323	146781559	+	downstream	5677	5441	NearestLocation	NA
chr11	108838165	108838565	401	*	3.57028	2.41594	4.20323	-1.33198	0.00576448	0.0171976	902	ENSG00000203334	108828445	108830523	+	downstream	9720	7642	NearestLocation	NA
chr3	119391585	119391985	401	*	4.91032	4.35423	5.3107	-0.869915	0.00577821	0.0172154	2959	ENSG00000138495	119373360	119396301	-	inside	4716	4316	NearestLocation	COX17
chr8	14262076	14262476	401	*	3.70169	2.64139	4.30621	-1.28566	0.00578002	0.0172154	4213	ENSG00000206950	14190064	14190172	+	downstream	72012	71904	NearestLocation	NA
chr3	172533730	172534130	401	*	3.82661	2.82919	4.41071	-1.24529	0.00578202	0.0172154	3036	ENSG00000227440	172546526	172546966	-	downstream	13236	12396	NearestLocation	NA
chr14	39961509	39961909	401	*	3.699	2.63731	4.30396	-1.2854	0.00578519	0.0172154	1387	ENSG00000258526	39944044	39982984	+	inside	17465	17465	NearestLocation	NA
chr20	46310638	46311038	401	*	3.69949	2.63935	4.30396	-1.28531	0.0057891	0.017216	2626	ENSG00000255438	46306645	46315041	+	inside	3993	3993	NearestLocation	NA
chr3	187828977	187829377	401	*	3.57402	2.41594	4.20805	-1.332	0.00580137	0.0172415	3060	ENSG00000234238	187824884	187864808	+	inside	4093	4093	NearestLocation	NA
chr2	110551583	110551983	401	*	4.86418	4.28976	5.27392	-0.889236	0.00581443	0.0172653	2339	ENSG00000015568	110550335	110615272	+	inside	1248	1248	NearestLocation	RGPD5
chr15	76603638	76604038	401	*	4.81245	4.22431	5.22908	-0.908268	0.00581678	0.0172653	1605	ENSG00000140374	76507696	76603813	-	overlapStart	175	175	NearestLocation	ETFA
chr17	56468887	56469287	401	*	4.05199	3.15004	4.60273	-1.18381	0.00583388	0.0173051	1885	ENSG00000108375	56429861	56494956	-	inside	26069	25669	NearestLocation	RNF43
chr7	157179850	157180250	401	*	3.93556	3.00011	4.49835	-1.20675	0.00585363	0.0173526	4174	ENSG00000105993	157128075	157210133	+	inside	51775	29883	NearestLocation	DNAJB6
chr9	32572265	32572665	401	*	3.93701	3.00011	4.50031	-1.20695	0.00586712	0.0173661	4447	ENSG00000165264	32552997	32573160	-	inside	895	495	NearestLocation	NDUFB6
chr1	38455578	38455978	401	*	3.57349	2.41355	4.20805	-1.33114	0.00586753	0.0173661	98	ENSG00000183431	38422647	38456593	-	inside	1015	615	NearestLocation	SF3A3
chr3	58045284	58045684	401	*	4.91084	4.3536	5.31182	-0.869866	0.00586933	0.0173661	2875	ENSG00000136068	57994127	58157982	+	inside	51157	51157	NearestLocation	FLNB
chr12	8122993	8123393	401	*	3.08003	0	4.00249	-1.45258	0.00587858	0.0173824	984	ENSG00000206636	8128855	8128956	+	upstream	-5862	5462	NearestLocation	NA
chr6	153323681	153324081	401	*	4.71329	4.07853	5.1526	-0.953395	0.00588519	0.0173909	3919	ENSG00000112031	153308497	153323820	-	overlapStart	139	139	NearestLocation	MTRF1L
chr15	57887284	57887684	401	*	4.65499	4.00011	5.10376	-0.975993	0.00589358	0.0174047	1553	ENSG00000255529	57884231	58074960	+	inside	3053	3053	NearestLocation	POLR2M
chr5	174525320	174525720	401	*	4.05906	3.15147	4.61185	-1.18505	0.00590272	0.0174207	3645	ENSG00000204754	174346085	174422516	-	upstream	-102804	102804	NearestLocation	LINC01951
chr2	20189511	20189911	401	*	3.9341	3.00011	4.49638	-1.20582	0.00591704	0.0174519	2192	ENSG00000118965	20110021	20189892	-	overlapStart	381	19	NearestLocation	WDR35
chr5	88132108	88132508	401	*	4.65903	4.0017	5.10893	-0.97681	0.00597647	0.017616	3482	ENSG00000248309	88179145	88762215	+	upstream	-47037	46637	NearestLocation	MEF2C-AS1
chr10	18744398	18744798	401	*	4.76068	4.15147	5.18769	-0.928896	0.00598298	0.0176241	504	ENSG00000225527	18820778	18822265	-	downstream	77867	75980	NearestLocation	NA
chr11	128357835	128358235	401	*	4.65436	4.0009	5.10247	-0.975183	0.00598855	0.0176294	942	ENSG00000254588	128396037	128400284	+	upstream	-38202	37802	NearestLocation	ETS1-AS1
chr1	64261242	64261642	401	*	5.16869	4.6892	5.52796	-0.781974	0.00599314	0.0176318	148	ENSG00000177452	64254392	64254975	-	upstream	-6267	6267	NearestLocation	RPL19P3
chr16	46782117	46782517	401	*	4.99997	4.47569	5.38369	-0.833875	0.00601661	0.017687	1683	ENSG00000260782	46823810	46825952	+	upstream	-41693	41293	NearestLocation	NA
chr11	32692628	32693028	401	*	3.69729	2.63731	4.3017	-1.28226	0.00601951	0.017687	785	ENSG00000270903	32613339	32614317	-	upstream	-78311	78311	NearestLocation	HNRNPA3P9
chr4	30838853	30839253	401	*	4.60159	3.91718	5.06389	-1.00204	0.00602687	0.0176975	3124	ENSG00000249678	30777879	30795592	-	upstream	-43261	43261	NearestLocation	NA
chr5	94449133	94449533	401	*	4.04226	3.1529	4.58838	-1.1713	0.00617375	0.0181174	3495	ENSG00000249545	94314855	94316597	+	downstream	134278	132536	NearestLocation	NA
chrX	44809945	44810345	401	*	4.39202	3.63833	4.88456	-1.06626	0.00619452	0.0181622	4628	ENSG00000252113	44744751	44744811	+	downstream	65194	65134	NearestLocation	RNU6-523P
chr7	47504637	47505037	401	*	4.53808	3.83098	5.01052	-1.02602	0.00619922	0.0181622	4025	ENSG00000136205	47314752	47622156	-	inside	117519	117119	NearestLocation	TNS3
chr15	89878116	89878516	401	*	4.13494	3.28976	4.66437	-1.14015	0.0062007	0.0181622	1626	ENSG00000261441	89878284	89879392	+	overlapStart	-168	168	NearestLocation	NA
chr5	130500183	130500583	401	*	5.58367	5.1887	5.89342	-0.669082	0.00622236	0.0182143	3557	ENSG00000186687	130506503	130541119	+	upstream	-6320	5920	NearestLocation	LYRM7
chr6	24313591	24313991	401	*	5.04029	4.53142	5.41572	-0.816622	0.00623792	0.0182484	3692	ENSG00000146049	24357131	24358512	+	upstream	-43540	43140	NearestLocation	KAAG1
chr12	32112026	32112426	401	*	4.04188	3.15147	4.58838	-1.17059	0.00626836	0.0183259	1020	ENSG00000174718	32112304	32146039	+	overlapStart	-278	122	NearestLocation	RESF1
chr5	123737584	123737984	401	*	4.39338	3.63935	4.88606	-1.06605	0.0062814	0.0183471	3536	ENSG00000253807	123641923	123740772	-	inside	3188	2788	NearestLocation	NA
chr3	193720953	193721353	401	*	4.31153	3.53197	4.81483	-1.08798	0.00628348	0.0183471	3076	ENSG00000214146	193675161	193721448	-	inside	495	95	NearestLocation	LINC02026
chr8	22094647	22095047	401	*	3.42688	2.15433	4.09233	-1.37363	0.0063121	0.0184192	4225	ENSG00000168490	22077222	22089854	-	upstream	-4793	4793	NearestLocation	PHYHIP
chr7	42533186	42533586	401	*	3.42421	2.15147	4.08972	-1.37298	0.00634043	0.0184903	4013	ENSG00000238284	42701325	42746046	-	downstream	212860	167739	NearestLocation	LINC01448
chr2	219757690	219758090	401	*	3.29171	1.83098	4.00249	-1.43139	0.00634897	0.0185036	2514	ENSG00000135925	219745085	219764303	+	inside	12605	6213	NearestLocation	WNT10A
chr20	47024308	47024708	401	*	4.13367	3.28976	4.66262	-1.13859	0.00635957	0.0185162	2628	ENSG00000236874	47012066	47013638	-	upstream	-10670	10670	NearestLocation	NA
chr22	30197082	30197482	401	*	4.3952	3.63833	4.88907	-1.06638	0.00636809	0.0185162	2731	ENSG00000184076	30163358	30166402	+	downstream	33724	30680	NearestLocation	UQCR10
chr9	123209012	123209412	401	*	4.3952	3.63833	4.88907	-1.06638	0.00636809	0.0185162	4567	ENSG00000136861	123151147	123342448	-	inside	133436	57865	NearestLocation	CDK5RAP2
chr2	37247385	37247785	401	*	5.0827	4.58666	5.45113	-0.801056	0.00636917	0.0185162	2225	ENSG00000115808	37070783	37193615	-	upstream	-53770	53770	NearestLocation	STRN
chr9	119233291	119233691	401	*	4.13819	3.29236	4.66788	-1.13922	0.00640755	0.0186074	4565	ENSG00000229105	119266562	119324572	+	upstream	-33271	32871	NearestLocation	ASTN2-AS1
chr17	77023614	77024014	401	*	3.68435	2.63935	4.284	-1.26824	0.00640852	0.0186074	1927	ENSG00000265096	77015291	77023737	-	overlapStart	123	123	NearestLocation	NA
chr15	83473302	83473702	401	*	5.12572	4.63782	5.48966	-0.787018	0.00643753	0.0186506	1617	ENSG00000186628	83424114	83474822	-	inside	1520	1120	NearestLocation	FSD2
chr2	54575785	54576185	401	*	5.4572	5.04024	5.78028	-0.6976	0.0064377	0.0186506	2257	ENSG00000177994	54557171	54610879	+	inside	18614	18614	NearestLocation	C2orf73
chr7	74508698	74509098	401	*	4.31488	3.53197	4.81957	-1.08814	0.00644015	0.0186506	4052	ENSG00000174428	74508364	74565623	+	inside	334	334	NearestLocation	GTF2IRD2B
chr11	2482382	2482782	401	*	3.68212	2.63731	4.28172	-1.26759	0.00644617	0.0186506	728	LRG_287	2466221	2870340	+	inside	16161	16161	NearestLocation	NA
chr10	5024183	5024583	401	*	3.68262	2.63935	4.28172	-1.26751	0.00644986	0.0186506	481	ENSG00000224251	5037680	5039572	+	upstream	-13497	13097	NearestLocation	NA
chr2	74304708	74305108	401	*	3.68262	2.63935	4.28172	-1.26751	0.00644986	0.0186506	2290	ENSG00000257800	74347807	74350345	+	upstream	-43099	42699	NearestLocation	NA
chr2	208031157	208031557	401	*	4.31201	3.52976	4.81641	-1.08743	0.00645137	0.0186506	2486	ENSG00000118263	207938861	208031991	-	inside	834	434	NearestLocation	KLF7
chr19	12032627	12033027	401	*	3.80845	2.83098	4.38582	-1.22714	0.00647158	0.0186848	2071	ENSG00000196757	12035883	12061588	+	upstream	-3256	2856	NearestLocation	ZNF700
chr18	47951468	47951868	401	*	4.32421	3.53416	4.8318	-1.09668	0.00647732	0.0186848	2010	ENSG00000221529	47927311	47927418	-	upstream	-24050	24050	NearestLocation	NA
chr2	225878131	225878531	401	*	4.70179	4.07928	5.13524	-0.940298	0.00648258	0.0186848	2530	ENSG00000263828	225875178	225875257	-	upstream	-2874	2874	NearestLocation	MIR4439
chr18	72508870	72509270	401	*	4.47665	3.7393	4.96224	-1.05264	0.00648291	0.0186848	2037	ENSG00000264247	72259010	72265744	-	upstream	-243126	243126	NearestLocation	LINC00909
chr2	111073610	111074010	401	*	5.72275	5.35423	6.01603	-0.630513	0.00648512	0.0186848	2342	ENSG00000264336	111058889	111058970	+	downstream	14721	14640	NearestLocation	NA
chr10	114206805	114207205	401	*	4.23518	3.41594	4.75447	-1.1201	0.00648854	0.0186848	692	ENSG00000151532	114206756	114578503	+	inside	49	49	NearestLocation	VTI1A
chr18	3703750	3704150	401	*	5.82532	5.47397	6.10764	-0.60433	0.00649516	0.0186848	1939	ENSG00000266401	3653410	3656282	+	downstream	50340	47468	NearestLocation	LOC105371967
chr18	39735032	39735432	401	*	4.85404	4.29106	5.25796	-0.876795	0.00649724	0.0186848	1996	ENSG00000267586	39739247	40271387	+	upstream	-4215	3815	NearestLocation	LINC00907
chr22	49893647	49894047	401	*	4.70094	4.07928	5.13398	-0.939944	0.00649924	0.0186848	2780	ENSG00000264139	49937041	49937114	-	downstream	43467	42994	NearestLocation	MIR3667
chr3	1397302	1397702	401	*	4.0355	3.1529	4.5791	-1.16656	0.00653159	0.0187301	2782	ENSG00000232563	1435857	1436132	-	downstream	38830	38155	NearestLocation	CRB3P1
chr22	31844499	31844899	401	*	3.68731	2.63731	4.28856	-1.26747	0.00653504	0.0187301	2734	ENSG00000240591	31850237	31860190	+	upstream	-5738	5338	NearestLocation	NA
chr1	68593910	68594310	401	*	3.6878	2.63935	4.28856	-1.26739	0.00653923	0.0187301	159	ENSG00000234383	68627444	68628773	-	downstream	34863	33134	NearestLocation	NA
chr2	200180005	200180405	401	*	3.43042	2.15147	4.09754	-1.37074	0.00654499	0.0187301	2478	ENSG00000257045	200190033	200194085	+	upstream	-10028	9628	NearestLocation	NA
chr9	79009738	79010138	401	*	3.8089	2.83276	4.38582	-1.22635	0.0065494	0.0187301	4492	ENSG00000135002	79000433	79009433	-	upstream	-305	305	NearestLocation	RFK
chr1	203009580	203009980	401	*	4.75226	4.1529	5.17445	-0.917059	0.00655144	0.0187301	377	ENSG00000143847	202995626	203047868	+	inside	13954	13954	NearestLocation	PPFIA4
chr18	53069065	53069465	401	*	4.64657	4.0009	5.09103	-0.963582	0.0065572	0.0187301	2014	ENSG00000267028	53119764	53150171	+	upstream	-50699	50299	NearestLocation	TCF4-AS1
chr15	68470215	68470615	401	*	3.68039	2.63731	4.27943	-1.26605	0.0065617	0.0187301	1583	ENSG00000129007	68483043	68498417	-	downstream	28202	12428	NearestLocation	CALML4
chr3	71517785	71518185	401	*	4.80684	4.22363	5.22099	-0.897104	0.00656176	0.0187301	2903	ENSG00000221264	71591121	71591240	-	downstream	73455	72936	NearestLocation	MIR1284
chr7	83824317	83824717	401	*	3.68088	2.63935	4.27943	-1.26597	0.00656571	0.0187301	4068	ENSG00000222994	83548918	83549019	-	upstream	-275298	275298	NearestLocation	NA
chr7	47114335	47114735	401	*	4.64746	4.0009	5.09233	-0.963837	0.00657313	0.0187301	4023	ENSG00000229192	47040218	47118726	-	inside	4391	3991	NearestLocation	NA
chr6	125691457	125691857	401	*	6.1522	5.85389	6.39927	-0.530038	0.00657461	0.0187301	3857	ENSG00000226409	125691357	125695470	-	inside	4013	100	NearestLocation	NA
chr12	27793572	27793972	401	*	3.80367	2.83098	4.37942	-1.22523	0.00657626	0.0187301	1017	ENSG00000256557	27761666	27761979	-	upstream	-31593	31593	NearestLocation	NA
chr5	31273312	31273712	401	*	3.80367	2.83098	4.37942	-1.22523	0.00657626	0.0187301	3391	ENSG00000254138	31094084	31267717	-	upstream	-5595	5595	NearestLocation	NA
chr7	79135849	79136249	401	*	4.90252	4.35485	5.29854	-0.85808	0.00657817	0.0187301	4063	ENSG00000226285	79173227	79174169	-	downstream	38320	36978	NearestLocation	NA
chr10	92681054	92681454	401	*	5.16493	4.68871	5.52235	-0.772777	0.00657921	0.0187301	639	ENSG00000148677	92671853	92681033	-	upstream	-21	21	NearestLocation	ANKRD1
chr12	32599458	32599858	401	*	4.70649	4.07853	5.14256	-0.948042	0.00658541	0.0187309	1022	ENSG00000253063	32630316	32630405	-	downstream	30947	30458	NearestLocation	RNU6-494P
chr8	12377582	12377982	401	*	4.8525	4.29106	5.25564	-0.876075	0.00658995	0.0187309	4209	ENSG00000221714	12384247	12384350	+	upstream	-6665	6265	NearestLocation	NA
chr4	99916303	99916703	401	*	3.81003	2.83098	4.38795	-1.22631	0.00659155	0.0187309	3210	ENSG00000164024	99916771	99983964	+	upstream	-468	68	NearestLocation	METAP1
chr2	214403187	214403587	401	*	3.42776	2.14861	4.09494	-1.36958	0.00660742	0.018754	2501	ENSG00000265734	214622791	214622883	+	upstream	-219604	219204	NearestLocation	MIR4438
chr6	164386520	164386920	401	*	4.7525	4.15362	5.17445	-0.916816	0.00660769	0.018754	3945	ENSG00000260422	164505055	164506693	-	downstream	120173	118135	NearestLocation	NA
chr8	18868047	18868447	401	*	4.46596	3.73643	4.94819	-1.04284	0.00661915	0.018775	4219	ENSG00000270255	18859137	18859460	+	downstream	8910	8587	NearestLocation	NA
chr1	82133068	82133468	401	*	3.69508	2.63526	4.29944	-1.27473	0.00664378	0.0188334	177	ENSG00000236676	82051626	82091398	-	upstream	-41670	41670	NearestLocation	NA
chr11	11350944	11351344	401	*	3.92019	3.0017	4.47693	-1.18866	0.00665338	0.0188378	747	ENSG00000255351	11373973	11374854	+	upstream	-23029	22629	NearestLocation	NA
chr11	47429661	47430061	401	*	3.92019	3.0017	4.47693	-1.18866	0.00665338	0.0188378	814	ENSG00000255197	47404699	47430741	-	inside	1080	680	NearestLocation	NA
chr8	94806763	94807163	401	*	3.80413	2.83276	4.37942	-1.22439	0.00665887	0.0188419	4324	ENSG00000164953	94767072	94831462	+	inside	39691	24299	NearestLocation	TMEM67
chr19	5827828	5828228	401	*	3.9183	3.00011	4.47493	-1.1882	0.00667567	0.018878	2055	ENSG00000171119	5823813	5828335	+	inside	4015	107	NearestLocation	NRTN
chr13	43774922	43775322	401	*	4.30896	3.53086	4.81167	-1.08474	0.00668569	0.0188906	1254	ENSG00000229928	43732767	43733602	+	downstream	42155	41320	NearestLocation	NA
chr18	35809073	35809473	401	*	3.55182	2.41594	4.17937	-1.31031	0.00668823	0.0188906	1991	ENSG00000268566	36235173	36267962	-	downstream	458889	425700	NearestLocation	NA
chr8	67837301	67837701	401	*	3.92166	3.0017	4.47893	-1.18852	0.00670931	0.0189158	4289	ENSG00000245910	67833919	67838633	-	inside	1332	932	NearestLocation	SNHG6
chr8	82281756	82282156	401	*	3.92166	3.0017	4.47893	-1.18852	0.00670931	0.0189158	4308	ENSG00000253859	82351671	82434053	+	upstream	-69915	69515	NearestLocation	NA
chrX	143215106	143215506	401	*	3.92166	3.0017	4.47893	-1.18852	0.00670931	0.0189158	4654	ENSG00000224630	143391959	143392205	-	downstream	177099	176453	NearestLocation	NA
chr2	222658908	222659308	401	*	4.70032	4.08003	5.13271	-0.938757	0.00671951	0.0189331	2524	ENSG00000233868	222808942	222809331	+	upstream	-150034	149634	NearestLocation	NA
chr6	82547770	82548170	401	*	3.54802	2.41594	4.17445	-1.30929	0.00672755	0.0189443	3782	ENSG00000224995	82523003	82523874	-	upstream	-23896	23896	NearestLocation	LINC01526
chr1	206524746	206525146	401	*	4.70301	4.07777	5.13777	-0.939896	0.00677799	0.0190694	388	ENSG00000163486	206516200	206637783	+	inside	8546	8546	NearestLocation	NA
chr2	169028550	169028950	401	*	4.94509	4.41594	5.33139	-0.838936	0.00678013	0.0190694	2422	ENSG00000238259	169088431	169088730	-	downstream	60180	59481	NearestLocation	NA
chr17	41150116	41150516	401	*	3.55371	2.41594	4.18182	-1.30935	0.00679111	0.0190887	1860	ENSG00000131469	41150290	41154976	+	overlapStart	-174	174	NearestLocation	RPL27
chr10	73610761	73611161	401	*	3.91725	3.0017	4.47293	-1.18676	0.00680086	0.0191046	597	ENSG00000197746	73576055	73611126	-	overlapStart	365	35	NearestLocation	PSAP
chr1	101947802	101948202	401	*	4.02488	3.1529	4.56451	-1.15445	0.00685044	0.0192208	219	ENSG00000231671	101788893	101855859	+	downstream	158909	91943	NearestLocation	LINC01307
chr6	157192308	157192708	401	*	4.02488	3.1529	4.56451	-1.15445	0.00685044	0.0192208	3925	ENSG00000270487	157101461	157101589	-	upstream	-90719	90719	NearestLocation	NA
chr13	111904473	111904873	401	*	4.5277	3.83098	4.99553	-1.01295	0.0068568	0.0192271	1344	ENSG00000153495	111968531	111996596	+	upstream	-64058	63658	NearestLocation	TEX29
chr10	77810804	77811204	401	*	4.02351	3.1529	4.56263	-1.15392	0.00687519	0.019267	610	ENSG00000221232	77887009	77887069	-	downstream	76265	75805	NearestLocation	NA
chr5	127374293	127374693	401	*	3.81207	2.83276	4.39007	-1.22354	0.00692246	0.0193879	3545	ENSG00000245937	127276118	127418864	-	inside	44571	44171	NearestLocation	LINC01184
chr1	41616713	41617113	401	*	4.12248	3.28976	4.64708	-1.12429	0.00697398	0.0195205	109	ENSG00000215893	41564310	41564808	+	downstream	52403	51905	NearestLocation	NA
chr4	26727678	26728078	401	*	4.06173	3.15147	4.61549	-1.17695	0.00699749	0.0195745	3118	ENSG00000200999	26703931	26704010	+	downstream	23747	23668	NearestLocation	NA
chr18	29166565	29166965	401	*	3.91536	3.00011	4.47092	-1.18467	0.00701636	0.0196155	1978	ENSG00000118271	29171689	29178974	+	upstream	-5124	4724	NearestLocation	TTR
chr5	128992662	128993062	401	*	4.29906	3.53086	4.79766	-1.07309	0.00704078	0.019672	3554	ENSG00000186367	129083772	129102425	+	upstream	-91110	90710	NearestLocation	MINAR2
chr6	26285420	26285820	401	*	4.64885	4.00249	5.09364	-0.962154	0.00705072	0.019678	3702	ENSG00000158406	26281283	26285762	-	overlapStart	342	58	NearestLocation	H4C8
chr2	202645101	202645501	401	*	3.92229	2.99851	4.48092	-1.18612	0.00705743	0.019678	2482	ENSG00000003393	202565277	202645912	-	inside	811	411	NearestLocation	ALS2
chr11	90964462	90964862	401	*	4.37947	3.63833	4.86668	-1.0508	0.00705979	0.019678	881	ENSG00000255187	90891251	90900462	+	downstream	73211	64000	NearestLocation	NA
chr21	40823558	40823958	401	*	4.37947	3.63833	4.86668	-1.0508	0.00705979	0.019678	2683	ENSG00000185437	40817781	40887433	+	inside	5777	5777	NearestLocation	SH3BGR
chr5	111563977	111564377	401	*	5.421	5.0013	5.74571	-0.699071	0.00707017	0.0196898	3514	ENSG00000251076	111563980	111593006	+	overlapStart	-3	3	NearestLocation	LOC101927023
chr19	7600390	7600790	401	*	5.07635	4.58507	5.44216	-0.790916	0.00707247	0.0196898	2061	ENSG00000032444	7598890	7626650	+	inside	1500	1500	NearestLocation	PNPLA6
chr4	53780093	53780493	401	*	3.92355	3.00328	4.48092	-1.18572	0.00708589	0.0197154	3145	ENSG00000248115	53811816	53824254	+	upstream	-31723	31323	NearestLocation	NA
chr5	66335134	66335534	401	*	4.2127	3.41475	4.72349	-1.09674	0.00709476	0.0197284	3445	ENSG00000229666	66297211	66299781	-	upstream	-35353	35353	NearestLocation	NA
chr22	38220589	38220989	401	*	4.21184	3.41594	4.72181	-1.09626	0.0071024	0.0197378	2752	ENSG00000128310	38219389	38221502	+	inside	1200	513	NearestLocation	GALR3
chr8	138202087	138202487	401	*	4.21458	3.41713	4.72517	-1.09691	0.00710758	0.0197405	4398	ENSG00000206678	138117595	138117701	+	downstream	84492	84386	NearestLocation	RNU6-144P
chr9	112528147	112528547	401	*	4.30816	3.53197	4.81008	-1.08164	0.00711411	0.0197468	4552	ENSG00000232939	112522640	112534323	-	inside	6176	5507	NearestLocation	LOC107987013
chr6	149195907	149196307	401	*	4.30131	3.53086	4.80086	-1.07325	0.00714772	0.0198283	3908	ENSG00000227660	149276764	149285820	-	downstream	89913	80457	NearestLocation	NA
chr13	110840059	110840459	401	*	5.71819	5.35423	6.00858	-0.623074	0.00719123	0.0199372	1338	ENSG00000265885	110750200	110750498	-	upstream	-89561	89561	NearestLocation	RN7SL783P
chr18	70342640	70343040	401	*	4.02722	3.15147	4.56827	-1.15261	0.00720809	0.0199552	2033	ENSG00000141668	70203915	70305756	-	upstream	-36884	36884	NearestLocation	CBLN2
chr1	84102746	84103146	401	*	4.21578	3.41713	4.72686	-1.09667	0.0072096	0.0199552	182	ENSG00000237076	84255963	84267148	+	upstream	-153217	152817	NearestLocation	NA
chr5	172087014	172087414	401	*	5.11708	4.63833	5.47593	-0.776188	0.00721057	0.0199552	3630	ENSG00000265160	172089168	172089266	+	upstream	-2154	1754	NearestLocation	MIR5003
chr12	16145598	16145998	401	*	5.27498	4.83187	5.61349	-0.733325	0.00721835	0.0199649	995	ENSG00000256134	16124824	16125543	-	upstream	-20055	20055	NearestLocation	NA
chr1	40723336	40723736	401	*	4.028	3.15433	4.56827	-1.15234	0.00722916	0.019983	105	LRG_212	40723733	40759856	+	overlapStart	-397	3	NearestLocation	NA
chr4	90188549	90188949	401	*	4.29986	3.52976	4.79926	-1.07213	0.00728938	0.0201375	3199	ENSG00000185477	90157537	90229161	-	inside	40612	31012	NearestLocation	GPRIN3
chr20	24484184	24484584	401	*	4.7948	4.22295	5.20323	-0.884003	0.00735415	0.0202819	2593	ENSG00000228539	24472108	24482981	-	upstream	-1203	1203	NearestLocation	NA
chr1	120060386	120060786	401	*	3.78798	2.83098	4.35832	-1.20748	0.00735871	0.0202819	241	ENSG00000203857	120049821	120057681	+	downstream	10565	2705	NearestLocation	HSD3B1
chr3	46458661	46459061	401	*	3.78959	2.83098	4.36049	-1.20778	0.00735902	0.0202819	2853	ENSG00000121797	46448654	46454488	+	downstream	10007	4173	NearestLocation	CCRL2
chr5	172717355	172717755	401	*	3.78959	2.83098	4.36049	-1.20778	0.00735902	0.0202819	3638	ENSG00000252169	172719520	172719622	-	downstream	2267	1765	NearestLocation	RNA5SP200
chr13	61333613	61334013	401	*	4.11901	3.29106	4.64174	-1.12045	0.00737087	0.0203025	1285	ENSG00000206854	61363694	61363795	+	upstream	-30081	29681	NearestLocation	NA
chr11	98430647	98431047	401	*	3.66328	2.63731	4.2568	-1.24721	0.00738717	0.0203242	893	ENSG00000254939	98435804	98437557	-	downstream	6910	4757	NearestLocation	LOC643381
chr9	34376812	34377212	401	*	3.9143	3.0017	4.46892	-1.18118	0.00739163	0.0203242	4450	ENSG00000164976	34366668	34376851	-	overlapStart	39	39	NearestLocation	MYORG
chr11	43333306	43333706	401	*	4.29712	3.53197	4.79446	-1.07026	0.0073918	0.0203242	797	ENSG00000166181	43333513	43366079	+	overlapStart	-207	193	NearestLocation	API5
chr5	77932485	77932885	401	*	4.02897	3.1529	4.57014	-1.15151	0.00740893	0.0203548	3468	ENSG00000248909	77940088	77940668	-	downstream	8183	7203	NearestLocation	NA
chr2	586533	586933	401	*	4.30099	3.52976	4.80086	-1.07182	0.00741599	0.0203548	2161	ENSG00000233633	558204	578145	+	downstream	28329	8388	NearestLocation	LOC105373352
chr3	42623620	42624020	401	*	4.52715	3.82919	4.99553	-1.0104	0.00741601	0.0203548	2847	ENSG00000008324	42623332	42636606	+	inside	288	288	NearestLocation	SS18L2
chr10	18940240	18940640	401	*	3.7912	2.83098	4.36265	-1.20737	0.0074427	0.0204134	506	ENSG00000241058	18834490	18940551	-	overlapStart	311	89	NearestLocation	NSUN6
chr4	140656187	140656587	401	*	4.15695	3.28846	4.69527	-1.14455	0.00744613	0.0204134	3271	ENSG00000178458	140619298	140619708	-	upstream	-36479	36479	NearestLocation	NA
chr4	62070131	62070531	401	*	4.57914	3.91802	5.0308	-0.97485	0.00745804	0.0204341	3155	ENSG00000150471	62066976	62944053	+	inside	3155	3155	NearestLocation	ADGRL3
chr6	116326317	116326717	401	*	3.26465	1.83098	3.96936	-1.40539	0.00746253	0.0204344	3840	ENSG00000186743	116359919	116360658	+	upstream	-33602	33202	NearestLocation	NA
chr2	76869225	76869625	401	*	3.39956	2.15147	4.05856	-1.34801	0.00747222	0.0204442	2296	ENSG00000251947	76822539	76822804	-	upstream	-46421	46421	NearestLocation	RN7SKP164
chr2	159991899	159992299	401	*	5.51524	5.11656	5.82726	-0.670392	0.00747489	0.0204442	2404	ENSG00000226878	159912606	159913371	-	upstream	-78528	78528	NearestLocation	NA
chr5	70363411	70363811	401	*	3.79074	2.82919	4.36265	-1.20677	0.00751911	0.0205531	3456	ENSG00000145736	70330784	70363516	-	overlapStart	105	105	NearestLocation	GTF2H2;GTF2H2C
chr14	78292271	78292671	401	*	3.40587	2.15147	4.06655	-1.34811	0.00752946	0.0205694	1447	ENSG00000199440	78287373	78287485	-	upstream	-4786	4786	NearestLocation	NA
chr17	48930343	48930743	401	*	4.02858	3.15147	4.57014	-1.15065	0.00754131	0.0205897	1877	ENSG00000243521	48925311	48926631	+	downstream	5032	3712	NearestLocation	RPL5P33
chr2	218295928	218296328	401	*	3.90233	3.00011	4.45316	-1.17011	0.00755925	0.0206192	2506	ENSG00000233143	218147462	218200843	+	downstream	148466	95085	NearestLocation	NA
chr3	49506362	49506762	401	*	3.90275	3.0017	4.45316	-1.17	0.00756704	0.0206192	2862	ENSG00000173402	49506146	49573048	+	inside	216	216	NearestLocation	DAG1
chr22	25843836	25844236	401	*	3.90381	3.00011	4.45519	-1.17034	0.00757074	0.0206192	2723	ENSG00000100058	25844072	25916821	+	overlapStart	-236	164	NearestLocation	CRYBB2P1
chr1	25628848	25629248	401	*	3.90424	3.0017	4.45519	-1.17023	0.00757866	0.0206192	62	ENSG00000224183	25620655	25621134	-	upstream	-7714	7714	NearestLocation	NA
chr5	41527233	41527633	401	*	3.90424	3.0017	4.45519	-1.17023	0.00757866	0.0206192	3410	ENSG00000182836	41307056	41510730	-	upstream	-16503	16503	NearestLocation	PLCXD3
chr5	113543817	113544217	401	*	3.90424	3.0017	4.45519	-1.17023	0.00757866	0.0206192	3520	ENSG00000222706	113589210	113589451	+	upstream	-45393	44993	NearestLocation	RN7SKP89
chr8	39928343	39928743	401	*	3.78476	2.83098	4.35398	-1.2047	0.00761454	0.0207048	4252	ENSG00000253381	39961688	39965454	+	upstream	-33345	32945	NearestLocation	NA
chr4	120251006	120251406	401	*	3.90084	3.00011	4.45113	-1.16916	0.00764149	0.020766	3246	ENSG00000250412	120255484	120299388	+	upstream	-4478	4078	NearestLocation	KLHL2P1
chr17	12452844	12453244	401	*	4.44668	3.73834	4.91967	-1.0183	0.0076571	0.0207842	1810	ENSG00000179136	12453099	12546171	+	overlapStart	-255	145	NearestLocation	LINC00670
chr5	148442688	148443088	401	*	4.44668	3.73834	4.91967	-1.0183	0.0076571	0.0207842	3592	ENSG00000169247	148303202	148442726	-	overlapStart	38	38	NearestLocation	SH3TC2
chr4	115285852	115286252	401	*	3.65977	2.63731	4.25214	-1.24398	0.00766339	0.0207892	3240	ENSG00000174607	115519611	115599380	+	upstream	-233759	233359	NearestLocation	UGT8
chr20	247588	247988	401	*	3.52926	2.41594	4.1501	-1.28789	0.00774448	0.0209969	2552	ENSG00000272874	247827	249498	+	overlapStart	-239	161	NearestLocation	NA
chr2	54013369	54013769	401	*	3.90339	2.99851	4.45519	-1.16901	0.00775664	0.0210177	2256	ENSG00000068912	54014181	54045956	+	upstream	-812	412	NearestLocation	ERLEC1
chr12	109251441	109251841	401	*	3.53119	2.41594	4.1526	-1.28744	0.00781252	0.0211568	1156	ENSG00000084112	109176466	109251366	-	upstream	-75	75	NearestLocation	SSH1
chr4	25205791	25206191	401	*	3.52871	2.41355	4.1501	-1.28701	0.00783071	0.0211938	3114	ENSG00000271172	25222025	25222535	+	upstream	-16234	15834	NearestLocation	NA
chr11	63448556	63448956	401	*	4.58219	3.91886	5.03487	-0.974376	0.00783802	0.0212013	826	ENSG00000133318	63448918	63527363	+	overlapStart	-362	38	NearestLocation	RTN3
chr10	11220502	11220902	401	*	5.02659	4.53031	5.39515	-0.795181	0.00784534	0.0212088	489	ENSG00000230322	11210885	11213339	-	upstream	-7163	7163	NearestLocation	NA
chr4	1786849	1787249	401	*	4.00728	3.1529	4.54024	-1.1357	0.00785241	0.0212151	3087	ENSG00000068078	1795034	1810599	+	upstream	-8185	7785	NearestLocation	FGFR3
chr2	110474247	110474647	401	*	3.52678	2.41355	4.14759	-1.28645	0.00785676	0.0212151	2337	ENSG00000233307	110490308	110490713	+	upstream	-16061	15661	NearestLocation	SRSF3P6
chr8	49282616	49283016	401	*	4.63644	3.99931	5.07686	-0.9488	0.00786455	0.0212238	4265	ENSG00000224594	49297150	49297609	+	upstream	-14534	14134	NearestLocation	NA
chr5	171296885	171297285	401	*	5.02542	4.53086	5.39303	-0.794786	0.00787365	0.0212339	3625	ENSG00000185662	171212876	171221602	+	downstream	84009	75283	NearestLocation	SMIM23
chr1	234735867	234736267	401	*	4.20003	3.41594	4.70519	-1.08136	0.00788344	0.0212339	443	ENSG00000228830	234742754	234745229	+	upstream	-6887	6487	NearestLocation	NA
chr2	219262364	219262764	401	*	4.20978	3.41713	4.71843	-1.09063	0.00789068	0.0212339	2512	ENSG00000144579	219262979	219270664	+	upstream	-615	215	NearestLocation	CTDSP1
chr17	65559949	65560349	401	*	3.5254	2.41594	4.14508	-1.28576	0.00789106	0.0212339	1909	ENSG00000264754	65520597	65521538	+	downstream	39352	38411	NearestLocation	NA
chr8	23848947	23849347	401	*	3.5254	2.41594	4.14508	-1.28576	0.00789106	0.0212339	4231	ENSG00000207201	23934510	23934671	-	downstream	85724	85163	NearestLocation	RNU1-148P
chr6	119682314	119682714	401	*	3.90678	3.00011	4.45925	-1.16857	0.00790511	0.0212595	3847	ENSG00000111885	119498374	119670926	-	upstream	-11388	11388	NearestLocation	MAN1A1
chr18	32239539	32239939	401	*	4.10733	3.28976	4.62597	-1.10706	0.00791212	0.0212661	1983	ENSG00000267585	32153951	32154487	-	upstream	-85052	85052	NearestLocation	RPL10AP13
chr1	25649343	25649743	401	*	4.20124	3.41594	4.7069	-1.08149	0.00792641	0.0212922	63	ENSG00000259984	25662920	25663956	-	downstream	14613	13177	NearestLocation	NA
chr4	106955364	106955764	401	*	4.10899	3.29106	4.62778	-1.10711	0.00795495	0.0213566	3224	ENSG00000249635	106924474	106943635	-	upstream	-11729	11729	NearestLocation	LOC101929577
chr1	148598608	148599008	401	*	4.64187	4.00011	5.08449	-0.956283	0.007972	0.0213778	265	ENSG00000226675	148598464	148598976	-	overlapStart	368	32	NearestLocation	NA
chr9	4020663	4021063	401	*	4.64187	4.00011	5.08449	-0.956283	0.007972	0.0213778	4418	ENSG00000230001	4070906	4071884	-	downstream	51221	49843	NearestLocation	NA
chr9	42213912	42214312	401	*	3.53311	2.41594	4.1551	-1.28586	0.00799076	0.0214158	4467	ENSG00000237846	42250840	42251545	+	upstream	-36928	36528	NearestLocation	NA
chr2	100287524	100287924	401	*	4.28599	3.53197	4.77866	-1.05692	0.00800478	0.0214313	2320	ENSG00000222274	100136565	100136694	+	downstream	150959	150830	NearestLocation	NA
chr12	93694376	93694776	401	*	4.51628	3.83098	4.97898	-0.99749	0.00800575	0.0214313	1130	ENSG00000257512	93708585	93709717	+	upstream	-14209	13809	NearestLocation	NA
chr10	71481655	71482055	401	*	4.20158	3.41713	4.7069	-1.08063	0.00807132	0.021584	591	ENSG00000235645	71444655	71452208	+	downstream	37000	29447	NearestLocation	NA
chr6	11206052	11206452	401	*	4.3668	3.63833	4.84857	-1.03501	0.00807204	0.021584	3669	ENSG00000247925	11173685	11259332	+	inside	32367	32367	NearestLocation	NA
chr22	36306998	36307398	401	*	4.8077	4.22431	5.22194	-0.898607	0.00809366	0.0216294	2747	ENSG00000237406	36293318	36294452	-	upstream	-12546	12546	NearestLocation	NDUFA9P1
chr8	122685014	122685414	401	*	4.74214	4.15433	5.15859	-0.90153	0.00810872	0.0216515	4370	ENSG00000248478	122691366	122719871	+	upstream	-6352	5952	NearestLocation	NA
chr9	85860986	85861386	401	*	4.30325	3.52976	4.80404	-1.06895	0.00811119	0.0216515	4499	ENSG00000229109	85834246	85849157	+	downstream	26740	11829	NearestLocation	NA
chr2	198541769	198542169	401	*	5.10978	4.63731	5.4651	-0.765589	0.0081549	0.021749	2474	ENSG00000162944	198432948	198540769	-	upstream	-1000	1000	NearestLocation	RFTN2
chr12	93521508	93521908	401	*	4.44362	3.73834	4.91525	-1.01485	0.00816095	0.021749	1129	ENSG00000257210	93517839	93518319	-	upstream	-3189	3189	NearestLocation	NA
chr3	17986528	17986928	401	*	3.89828	3.0017	4.44706	-1.16455	0.0081617	0.021749	2809	ENSG00000226238	18031515	18037036	+	upstream	-44987	44587	NearestLocation	NA
chr4	174370284	174370684	401	*	4.28485	3.53197	4.77704	-1.05556	0.00819318	0.0218204	3324	ENSG00000252898	174367754	174367855	-	upstream	-2429	2429	NearestLocation	RNU6-1096P
chr10	17954792	17955192	401	*	4.10512	3.29106	4.62237	-1.10448	0.00820823	0.021848	498	ENSG00000207937	17887107	17887193	+	downstream	67685	67599	NearestLocation	NA
chr15	34551789	34552189	401	*	4.74107	4.15362	5.15735	-0.90094	0.00821686	0.0218554	1504	ENSG00000259468	34547487	34550033	+	downstream	4302	1756	NearestLocation	NA
chr1	167604583	167604983	401	*	4.2021	3.41475	4.7086	-1.08034	0.00822037	0.0218554	310	ENSG00000241666	167596622	167599911	-	upstream	-4672	4672	NearestLocation	NA
chr13	22245008	22245408	401	*	4.44945	3.73739	4.92407	-1.01696	0.00823699	0.0218871	1207	ENSG00000102678	22245522	22278637	+	upstream	-514	114	NearestLocation	FGF9
chr16	66939048	66939448	401	*	4.28859	3.53307	4.7819	-1.05607	0.00830941	0.0220544	1722	ENSG00000166589	66942025	66952887	-	downstream	13839	2577	NearestLocation	CDH16
chr2	106112750	106113150	401	*	4.28859	3.53307	4.7819	-1.05607	0.00830941	0.0220544	2328	ENSG00000115641	105974169	106054970	-	upstream	-57780	57780	NearestLocation	FHL2
chr2	198363536	198363936	401	*	4.50798	3.83187	4.96652	-0.98666	0.00839132	0.0222592	2473	ENSG00000115541	198364718	198368181	+	upstream	-1182	782	NearestLocation	HSPE1
chr15	39693143	39693543	401	*	4.7354	4.15362	5.14885	-0.891757	0.00841759	0.0223162	1519	ENSG00000259345	39157523	39719396	-	inside	26253	25853	NearestLocation	NA
chr6	42981837	42982237	401	*	3.77211	2.83098	4.33691	-1.18782	0.00844678	0.0223808	3732	ENSG00000124702	42981951	42989036	+	overlapStart	-114	114	NearestLocation	KLHDC3
chr10	51731844	51732244	401	*	4.83477	4.29041	5.22908	-0.85153	0.00845744	0.0223964	564	ENSG00000178440	51732523	51741813	+	upstream	-679	279	NearestLocation	TIMM23B-AGAP6
chr12	51012965	51013365	401	*	4.56932	3.91886	5.01603	-0.960849	0.00848798	0.0224645	1056	ENSG00000207136	51027056	51027159	+	upstream	-14091	13691	NearestLocation	RNU6-769P
chr4	187869385	187869785	401	*	4.56812	3.91802	5.01465	-0.960463	0.00851275	0.0224929	3355	ENSG00000249539	187821694	187821992	+	downstream	47691	47393	NearestLocation	NA
chr22	24897394	24897794	401	*	4.44391	3.7393	4.91525	-1.01317	0.00851948	0.0224929	2721	ENSG00000178803	24825178	24891042	-	upstream	-6352	6352	NearestLocation	ADORA2A-AS1
chr6	134940857	134941257	401	*	3.77165	2.82919	4.33691	-1.18727	0.00852644	0.0224929	3876	ENSG00000229722	134927437	134930575	-	upstream	-10282	10282	NearestLocation	NA
chr3	2806721	2807121	401	*	3.64598	2.63731	4.23382	-1.22623	0.00852804	0.0224929	2783	ENSG00000225310	3026915	3027259	-	downstream	220538	219794	NearestLocation	DNAJC19P4
chr14	24911988	24912388	401	*	3.76839	2.82919	4.3325	-1.18664	0.00852913	0.0224929	1370	ENSG00000100445	24908972	24912111	-	overlapStart	123	123	NearestLocation	SDR39U1
chr11	36554443	36554843	401	*	3.64648	2.63935	4.23382	-1.22615	0.00853247	0.0224929	794	ENSG00000166349	36532259	36614706	+	inside	22184	22184	NearestLocation	RAG1
chr7	5534316	5534716	401	*	3.64648	2.63935	4.23382	-1.22615	0.00853247	0.0224929	3966	ENSG00000207973	5535450	5535548	-	downstream	1232	734	NearestLocation	MIR589
chrX	3732996	3733396	401	*	3.76932	2.83276	4.3325	-1.18645	0.00854263	0.0224976	4607	ENSG00000205664	3735569	3761898	-	downstream	28902	2173	NearestLocation	NA
chr1	119202323	119202723	401	*	4.10346	3.28976	4.62056	-1.10213	0.00854957	0.0224976	240	ENSG00000226126	119156956	119158269	-	upstream	-44054	44054	NearestLocation	PSMC1P12
chr15	66923127	66923527	401	*	4.10346	3.28976	4.62056	-1.10213	0.00854957	0.0224976	1575	ENSG00000259471	66874528	66978132	+	inside	48599	48599	NearestLocation	LINC01169
chr2	54785307	54785707	401	*	4.00491	3.15433	4.53642	-1.13029	0.00855351	0.0224976	2259	ENSG00000234943	54772505	54773814	-	upstream	-11493	11493	NearestLocation	NA
chr3	126465296	126465696	401	*	4.57026	3.91886	5.0174	-0.96094	0.00856265	0.0224977	2972	ENSG00000249558	126485277	126486318	-	downstream	21022	19581	NearestLocation	RCC2P4
chr1	55370053	55370453	401	*	3.64293	2.63935	4.22908	-1.22533	0.00856319	0.0224977	132	ENSG00000233203	55353236	55354523	+	downstream	16817	15530	NearestLocation	NA
chr17	15774715	15775115	401	*	4.62726	4.0009	5.06256	-0.936317	0.0085693	0.022501	1821	ENSG00000227790	15732683	15767467	+	downstream	42032	7248	NearestLocation	NA
chr9	121766914	121767314	401	*	3.88617	3.00011	4.43106	-1.15155	0.00858877	0.0225395	4566	ENSG00000231166	121526145	121526623	+	downstream	240769	240291	NearestLocation	LOC107987035
chr6	76342728	76343128	401	*	3.8866	3.0017	4.43106	-1.15144	0.00859732	0.0225492	3773	ENSG00000252498	76353800	76353893	+	upstream	-11072	10672	NearestLocation	RNU6-1016P
chr3	44518749	44519149	401	*	4.4346	3.73834	4.90222	-1.00332	0.00865848	0.0226827	2849	ENSG00000185219	44481262	44519162	-	inside	413	13	NearestLocation	ZNF445
chr11	3530674	3531074	401	*	3.64826	2.63935	4.23618	-1.22537	0.00866073	0.0226827	731	ENSG00000255522	3552650	3552838	+	upstream	-21976	21576	NearestLocation	NA
chr14	51471628	51472028	401	*	4.56718	3.91802	5.01327	-0.959562	0.00866279	0.0226827	1395	ENSG00000258711	51422977	51428720	-	upstream	-42908	42908	NearestLocation	NA
chr7	123895330	123895730	401	*	4.31935	3.53197	4.82585	-1.07735	0.00867438	0.0227003	4124	ENSG00000243574	123914733	123927598	-	downstream	32268	19003	NearestLocation	NA
chr8	97592113	97592513	401	*	3.77421	2.83276	4.33911	-1.18624	0.00869444	0.0227282	4329	ENSG00000104324	97657455	98161882	+	upstream	-65342	64942	NearestLocation	CPQ
chr12	124118098	124118498	401	*	3.76769	2.83276	4.33029	-1.18499	0.00869479	0.0227282	1197	ENSG00000111358	124118375	124147153	+	overlapStart	-277	123	NearestLocation	GTF2H3
chr1	147319969	147320369	401	*	3.64699	2.64139	4.23382	-1.22457	0.00871493	0.0227681	258	ENSG00000223728	147313096	147314493	+	downstream	6873	5476	NearestLocation	LOC391092
chr6	39082648	39083048	401	*	4.45047	3.73739	4.92554	-1.01522	0.00874665	0.0228382	3724	ENSG00000112167	39071840	39082965	-	overlapStart	317	83	NearestLocation	SAYSD1
chr12	121409692	121410092	401	*	3.88359	3.0017	4.42693	-1.1495	0.00878846	0.0229345	1189	ENSG00000272214	121407641	121410095	-	inside	403	3	NearestLocation	NA
chr9	112886649	112887049	401	*	3.99366	3.1529	4.52139	-1.11888	0.00880804	0.0229728	4555	ENSG00000188959	112952328	112970469	-	downstream	83820	65279	NearestLocation	C9orf152
chr1	208547998	208548398	401	*	4.3562	3.63833	4.83336	-1.0214	0.00885889	0.0230925	394	ENSG00000226843	208428635	208428721	-	upstream	-119277	119277	NearestLocation	NA
chr8	141678389	141678789	401	*	3.23944	1.83098	3.93836	-1.37783	0.00886458	0.0230944	4401	ENSG00000123908	141541264	141645718	-	upstream	-32671	32671	NearestLocation	AGO2
chr6	36816876	36817276	401	*	4.10309	3.28846	4.62056	-1.10026	0.00888015	0.0231221	3721	ENSG00000124772	36708552	36807778	-	upstream	-9098	9098	NearestLocation	CPNE5
chr1	237547592	237547992	401	*	4.6243	4.00011	5.05856	-0.934195	0.00892408	0.0232235	454	ENSG00000266262	237634419	237634491	+	upstream	-86827	86427	NearestLocation	MIR4428
chr6	28303407	28303807	401	*	4.68469	4.07853	5.11022	-0.913061	0.00893807	0.0232445	3711	ENSG00000189298	28317691	28336947	+	upstream	-14284	13884	NearestLocation	ZKSCAN3
chr12	104074481	104074881	401	*	4.18568	3.41594	4.68493	-1.06455	0.00894212	0.0232445	1143	ENSG00000257766	104062353	104063184	-	upstream	-11297	11297	NearestLocation	NA
chr1	196385107	196385507	401	*	3.76512	2.82919	4.32808	-1.18279	0.00895913	0.0232758	360	ENSG00000265986	196551543	196551611	-	downstream	166504	166036	NearestLocation	MIR4735
chr2	233415157	233415557	401	*	4.27477	3.53197	4.76269	-1.04196	0.00897068	0.0232927	2540	ENSG00000266620	233415184	233415283	-	includeFeature	126	27	NearestLocation	NA
chr1	116877812	116878212	401	*	3.99267	3.15433	4.51945	-1.11747	0.00897562	0.0232927	232	ENSG00000163399	116915290	116952883	+	upstream	-37478	37078	NearestLocation	ATP1A1
chr15	92435092	92435492	401	*	4.35589	3.63731	4.83336	-1.02087	0.00899651	0.0233339	1628	ENSG00000176463	92396925	92715665	+	inside	38167	38167	NearestLocation	SLCO3A1
chr6	33479904	33480304	401	*	3.5083	2.41594	4.12278	-1.26477	0.00902904	0.0234011	3713	ENSG00000242014	33508471	33508774	+	upstream	-28567	28167	NearestLocation	RN7SL26P
chr4	2862585	2862985	401	*	4.18812	3.41594	4.68838	-1.06485	0.00903245	0.0234011	3089	ENSG00000087274	2845584	2931803	+	inside	17001	17001	NearestLocation	ADD1
chr7	105909765	105910165	401	*	4.43298	3.73643	4.90073	-1.00138	0.00906809	0.023473	4089	ENSG00000273320	105925926	105926772	+	upstream	-16161	15761	NearestLocation	NA
chr7	69606962	69607362	401	*	4.18533	3.41475	4.68493	-1.06397	0.00907027	0.023473	4047	ENSG00000158321	69063905	70258054	+	inside	543057	543057	NearestLocation	AUTS2
chr6	24584060	24584460	401	*	4.24436	3.41594	4.76727	-1.11141	0.00908905	0.0234968	3693	ENSG00000218186	24598240	24600018	+	upstream	-14180	13780	NearestLocation	KRT8P43
chr1	80112698	80113098	401	*	4.18445	3.41594	4.6832	-1.06344	0.00908952	0.0234968	173	ENSG00000232676	79986765	79987888	+	downstream	125933	124810	NearestLocation	ADH5P2
chr17	19015533	19015933	401	*	7.38709	7.53823	7.21824	0.313575	0.00911222	0.0235424	1829	ENSG00000262202	19015313	19015949	-	inside	416	16	NearestLocation	NA
chr11	46718788	46719188	401	*	5.01645	4.53031	5.37942	-0.78288	0.00912052	0.0235508	808	ENSG00000175220	46698630	46722165	-	inside	3377	2977	NearestLocation	ARHGAP1
chr5	50679062	50679462	401	*	4.3548	3.63731	4.8318	-1.0199	0.00913088	0.0235645	3422	ENSG00000259663	50668570	50679166	-	overlapStart	104	104	NearestLocation	LOC642366
chr3	183903474	183903874	401	*	3.99127	3.15433	4.51751	-1.11613	0.00914041	0.0235761	3052	ENSG00000161204	183903811	183911800	+	overlapStart	-337	63	NearestLocation	ABCF3
chr3	95985685	95986085	401	*	4.35868	3.63935	4.83648	-1.02074	0.00917701	0.0236574	2930	ENSG00000271671	95963576	95964179	-	upstream	-21506	21506	NearestLocation	NA
chr5	96204618	96205018	401	*	3.50383	2.41355	4.11767	-1.26258	0.00920518	0.0237169	3497	ENSG00000164308	96211643	96255420	+	upstream	-7025	6625	NearestLocation	ERAP2
chr12	2082155	2082555	401	*	5.50281	5.11546	5.80786	-0.653273	0.00923691	0.0237856	964	ENSG00000151067	2079952	2802108	+	inside	2203	2203	NearestLocation	CACNA1C
chr16	58144476	58144876	401	*	3.51081	2.41832	4.12534	-1.26251	0.00929911	0.0239325	1710	ENSG00000260545	58150789	58153257	+	upstream	-6313	5913	NearestLocation	NA
chr20	36712780	36713180	401	*	4.27395	3.53307	4.76105	-1.03995	0.00930942	0.0239458	2614	ENSG00000264767	36726798	36727102	-	downstream	14322	13618	NearestLocation	RN7SL237P
chr7	138351093	138351493	401	*	4.68581	4.07928	5.11151	-0.912191	0.00934983	0.0240365	4150	ENSG00000234658	138330416	138331193	-	upstream	-19900	19900	NearestLocation	NA
chr11	94588161	94588561	401	*	5.14173	4.6892	5.48569	-0.741069	0.00935879	0.0240463	888	ENSG00000213368	94646212	94646931	+	upstream	-58051	57651	NearestLocation	NA
chr18	42462155	42462555	401	*	4.27707	3.53197	4.76597	-1.04091	0.00937301	0.0240696	2000	ENSG00000265957	42550047	42550131	-	downstream	87976	87492	NearestLocation	MIR4319
chr19	2236673	2237073	401	*	4.28191	3.52976	4.77379	-1.04873	0.0094396	0.0242273	2043	ENSG00000104897	2236520	2248678	+	inside	153	153	NearestLocation	SF3A2
chr20	34330139	34330539	401	*	4.77738	4.22295	5.17691	-0.858785	0.00946286	0.0242736	2609	ENSG00000131051	34291531	34330234	-	overlapStart	95	95	NearestLocation	RBM39
chr17	836686	837086	401	*	4.43871	3.73834	4.90816	-1.00132	0.00955967	0.0245085	1774	ENSG00000262003	812872	814452	+	downstream	23814	22234	NearestLocation	LOC101927727
chr10	123899116	123899516	401	*	4.82656	4.29106	5.21621	-0.839107	0.00959342	0.0245815	710	ENSG00000138152	124030821	124097677	+	upstream	-131705	131305	NearestLocation	BTBD16
chr3	8649162	8649562	401	*	4.87746	4.35485	5.26029	-0.82195	0.00960594	0.0245915	2792	ENSG00000227110	7994492	8653610	-	inside	4448	4048	NearestLocation	LMCD1-AS1;LOC101927394
chr5	120344782	120345182	401	*	5.85538	5.53169	6.11959	-0.564741	0.00960947	0.0245915	3526	ENSG00000251135	120375785	120379727	+	upstream	-31003	30603	NearestLocation	NA
chr4	148095010	148095410	401	*	6.36067	6.09786	6.58291	-0.468432	0.00961312	0.0245915	3285	ENSG00000260090	147926644	147930297	+	downstream	168366	164713	NearestLocation	NA
chr9	70103327	70103727	401	*	4.55795	3.91802	4.99971	-0.946545	0.00962831	0.0245942	4475	ENSG00000267085	70116128	70116383	-	downstream	13056	12401	NearestLocation	NA
chr15	76500114	76500514	401	*	3.75277	2.83098	4.3107	-1.16768	0.00963001	0.0245942	1604	ENSG00000259422	76467232	76473827	-	upstream	-26287	26287	NearestLocation	LOC101929439
chr8	101971456	101971856	401	*	3.75277	2.83098	4.3107	-1.16768	0.00963001	0.0245942	4343	ENSG00000242315	101970111	101970406	+	downstream	1345	1050	NearestLocation	RN7SL685P
chr15	63108489	63108889	401	*	4.77599	4.22363	5.17445	-0.857805	0.00964455	0.0246179	1562	ENSG00000211137	63116156	63116240	+	upstream	-7667	7267	NearestLocation	MIR190A
chr10	65028728	65029128	401	*	4.27641	3.52976	4.76597	-1.03955	0.00971428	0.0247703	579	ENSG00000234369	64981915	64982805	+	downstream	46813	45923	NearestLocation	TATDN1P1
chr2	118571952	118572352	401	*	3.7523	2.82919	4.3107	-1.16715	0.00971502	0.0247703	2354	ENSG00000088205	118572226	118589955	+	overlapStart	-274	126	NearestLocation	DDX18
chr11	12238542	12238942	401	*	3.75065	2.82919	4.30845	-1.16682	0.00972021	0.0247703	754	ENSG00000254680	12282973	12284720	-	downstream	46178	44031	NearestLocation	NA
chr13	24441318	24441718	401	*	3.75159	2.83276	4.30845	-1.16664	0.00973269	0.0247805	1211	ENSG00000205861	24463028	24471402	+	upstream	-21710	21310	NearestLocation	PCOTH
chr12	117480058	117480458	401	*	4.55701	3.91802	4.99832	-0.945838	0.00973482	0.0247805	1177	ENSG00000257279	117415247	117425142	-	upstream	-54916	54916	NearestLocation	LOC100506551
chr2	213224140	213224540	401	*	4.77982	4.22295	5.1806	-0.858928	0.00974267	0.024787	2496	ENSG00000221782	213290987	213291084	-	downstream	66944	66447	NearestLocation	MIR548F2
chr2	48133634	48134034	401	*	4.42345	3.73834	4.88606	-0.988652	0.0097577	0.0248117	2249	ENSG00000138081	48016455	48132932	-	upstream	-702	702	NearestLocation	FBXO11
chr12	118935996	118936396	401	*	3.53886	2.41594	4.16258	-1.26956	0.00977275	0.0248289	1179	ENSG00000111707	118814185	118855840	+	downstream	121811	80156	NearestLocation	SUDS3
chr4	86958984	86959384	401	*	3.86831	3.00011	4.40652	-1.13224	0.00978174	0.0248289	3191	ENSG00000261496	86933449	86935027	-	upstream	-23957	23957	NearestLocation	NA
chr11	100718487	100718887	401	*	3.86875	3.0017	4.40652	-1.13213	0.0097911	0.0248289	896	ENSG00000200047	100710361	100710677	+	downstream	8126	7810	NearestLocation	RN7SKP115
chr12	4076868	4077268	401	*	3.86875	3.0017	4.40652	-1.13213	0.0097911	0.0248289	974	ENSG00000256969	4130143	4135824	+	upstream	-53275	52875	NearestLocation	NA
chr9	127421668	127422068	401	*	3.86875	3.0017	4.40652	-1.13213	0.0097911	0.0248289	4578	ENSG00000224020	127420746	127460910	+	inside	922	922	NearestLocation	MIR181A2HG
chr14	68580303	68580703	401	*	4.67358	4.07853	5.09364	-0.899975	0.00980235	0.024844	1425	ENSG00000258837	68591721	68596913	-	downstream	16610	11018	NearestLocation	NA
chr18	40761609	40762009	401	*	3.62305	2.63731	4.20323	-1.20411	0.00983597	0.0249157	1997	ENSG00000152214	40323192	40695657	-	upstream	-65952	65952	NearestLocation	RIT2
chr2	30929825	30930225	401	*	3.74994	2.83276	4.30621	-1.16556	0.00984865	0.0249342	2214	ENSG00000230118	30969310	30969567	-	downstream	39742	39085	NearestLocation	NA
chr2	237921192	237921592	401	*	4.18201	3.41594	4.67973	-1.05886	0.0098594	0.0249479	2545	ENSG00000202341	237923847	237923948	-	downstream	2756	2255	NearestLocation	RNU6-1051P
chr10	28971070	28971470	401	*	4.82476	4.29041	5.21382	-0.838008	0.00988585	0.0250013	519	ENSG00000095739	28966271	28971868	+	inside	4799	398	NearestLocation	BAMBI
chr15	23378281	23378681	401	*	3.62666	2.63731	4.20805	-1.20422	0.00989909	0.0250077	1488	ENSG00000140181	23282281	23378228	-	upstream	-53	53	NearestLocation	NA
chr3	48646801	48647201	401	*	3.62666	2.63731	4.20805	-1.20422	0.00989909	0.0250077	2860	ENSG00000010256	48636435	48648409	-	inside	1608	1208	NearestLocation	UQCRC1
chr1	26393311	26393711	401	*	4.96567	4.47455	5.33139	-0.787462	0.00991399	0.0250281	67	ENSG00000158022	26377795	26394927	-	inside	1616	1216	NearestLocation	TRIM63
chr17	61458437	61458837	401	*	4.92538	4.41653	5.3008	-0.804691	0.00991792	0.0250281	1897	ENSG00000271749	61470716	61470947	+	upstream	-12279	11879	NearestLocation	NA
chr20	50145500	50145900	401	*	4.61479	4.0009	5.04407	-0.921041	0.00992688	0.0250372	2634	ENSG00000101096	50003494	50179370	-	inside	33870	33470	NearestLocation	NFATC2
chr8	40755172	40755572	401	*	3.62124	2.63731	4.20081	-1.20286	0.00996393	0.0251044	4254	ENSG00000165061	40388109	40755352	-	overlapStart	180	180	NearestLocation	ZMAT4
chr12	123394467	123394867	401	*	3.62176	2.63935	4.20081	-1.20278	0.00996882	0.0251044	1195	ENSG00000139722	123349882	123380991	-	upstream	-13476	13476	NearestLocation	VPS37B
chr3	194041477	194041877	401	*	3.74781	2.83098	4.30396	-1.16449	0.00996965	0.0251044	3079	ENSG00000214145	194014254	194030592	-	upstream	-10885	10885	NearestLocation	LINC00887
chr9	71746020	71746420	401	*	4.72491	4.15433	5.13271	-0.877048	0.00998375	0.0251263	4482	ENSG00000119139	71736209	71870124	+	inside	9811	9811	NearestLocation	TJP2
chr1	27216555	27216955	401	*	3.97709	3.1529	4.49835	-1.1005	0.00999258	0.0251271	70	ENSG00000142751	27202624	27216788	-	overlapStart	233	167	NearestLocation	GPN2
chr4	186754202	186754602	401	*	4.8727	4.35423	5.25331	-0.819879	0.00999484	0.0251271	3349	ENSG00000235149	186839294	186840614	+	upstream	-85092	84692	NearestLocation	NA
chr2	190627257	190627657	401	*	3.97851	3.1529	4.50031	-1.10074	0.0100134	0.0251601	2459	ENSG00000253559	190627430	190630282	+	overlapStart	-173	173	NearestLocation	NA
chr19	39155051	39155451	401	*	4.34552	3.63833	4.81799	-1.00637	0.0100382	0.0251971	2110	ENSG00000130402	39138289	39222223	+	inside	16762	16762	NearestLocation	ACTN4
chr10	119910996	119911396	401	*	4.34333	3.63833	4.81483	-1.0056	0.0100389	0.0251971	702	ENSG00000238276	120001076	120027222	+	upstream	-90080	89680	NearestLocation	LOC101927760
chr12	18902999	18903399	401	*	4.18236	3.41713	4.67973	-1.05775	0.0100762	0.0252772	999	ENSG00000177938	18891045	18892121	+	downstream	11954	10878	NearestLocation	CAPZA3
chr5	108083973	108084373	401	*	5.00941	4.53142	5.36783	-0.771926	0.010091	0.0253007	3509	ENSG00000151422	108083523	108532542	+	inside	450	450	NearestLocation	FER
chr10	18349153	18349553	401	*	3.97568	3.1529	4.49638	-1.09958	0.010099	0.0253072	500	ENSG00000226083	18290715	18299491	-	upstream	-49662	49662	NearestLocation	SLC39A12-AS1
chr8	20298748	20299148	401	*	3.86635	2.99851	4.40442	-1.12998	0.0101139	0.0253252	4222	ENSG00000253164	20207721	20230280	+	downstream	91027	68468	NearestLocation	NA
chr1	48515878	48516278	401	*	4.34411	3.63731	4.81641	-1.00574	0.0101171	0.0253252	120	ENSG00000226133	48519217	48532873	+	upstream	-3339	2939	NearestLocation	NA
chr6	113091724	113092124	401	*	3.3533	2.15147	3.99971	-1.29959	0.0101369	0.0253613	3833	ENSG00000271498	113147141	113147672	+	upstream	-55417	55017	NearestLocation	NA
chr22	40552049	40552449	401	*	3.35547	2.15147	4.00249	-1.29971	0.0101545	0.0253918	2759	ENSG00000228599	40502329	40503070	-	upstream	-48979	48979	NearestLocation	RPL7P52
chr3	47324150	47324550	401	*	3.97992	3.1529	4.50228	-1.10028	0.0101665	0.0254082	2856	ENSG00000114648	47324407	47388306	+	overlapStart	-257	143	NearestLocation	KLHL18
chr2	238813857	238814257	401	*	3.87287	3.00011	4.4128	-1.1309	0.0101812	0.0254249	2548	ENSG00000263723	238778547	238778625	+	downstream	35310	35232	NearestLocation	NA
chr10	15859619	15860019	401	*	4.07825	3.29106	4.58467	-1.0722	0.0101841	0.0254249	495	ENSG00000148481	15820169	15902519	-	inside	42900	39450	NearestLocation	MINDY3
chr5	134801798	134802198	401	*	4.3452	3.63731	4.81799	-1.00584	0.0101936	0.0254349	3565	ENSG00000255833	134779908	134788089	-	upstream	-13709	13709	NearestLocation	TIFAB
chr12	53318887	53319287	401	*	5.09617	4.63833	5.44318	-0.744309	0.0102175	0.0254488	1061	ENSG00000111057	53342655	53346685	+	upstream	-23768	23368	NearestLocation	KRT18
chr6	137283823	137284223	401	*	4.07956	3.29106	4.58653	-1.0724	0.0102181	0.0254488	3881	ENSG00000230350	137295067	137295354	-	downstream	11531	10844	NearestLocation	RPL35AP3
chr8	56947508	56947908	401	*	4.07956	3.29106	4.58653	-1.0724	0.0102181	0.0254488	4275	ENSG00000241997	56934580	56934872	-	upstream	-12636	12636	NearestLocation	RN7SL323P
chr7	107384065	107384465	401	*	5.05215	4.58507	5.40442	-0.757477	0.010221	0.0254488	4092	ENSG00000105879	107384142	107402112	+	overlapStart	-77	77	NearestLocation	CBLL1
chr21	46850831	46851231	401	*	4.09575	3.29366	4.60821	-1.08361	0.0102356	0.0254716	2696	ENSG00000183535	46839631	46844985	-	upstream	-5846	5846	NearestLocation	COL18A1-AS1
chr3	177606989	177607389	401	*	4.66922	4.07853	5.08711	-0.897183	0.0102422	0.0254731	3045	ENSG00000225790	177652611	177655450	+	upstream	-45622	45222	NearestLocation	NA
chr17	4491149	4491549	401	*	5.09682	4.63833	5.4442	-0.74441	0.0102471	0.0254731	1792	ENSG00000188176	4487294	4511614	+	inside	3855	3855	NearestLocation	SMTNL2
chr12	122985363	122985763	401	*	4.62185	4.0009	5.05455	-0.928758	0.0102681	0.0255118	1194	ENSG00000033030	122957417	122985518	-	overlapStart	155	155	NearestLocation	ZCCHC8
chr1	81983762	81984162	401	*	3.35174	2.15433	3.99693	-1.29765	0.0102922	0.0255444	175	ENSG00000227960	81970784	81971981	+	downstream	12978	11781	NearestLocation	NA
chr7	142552307	142552707	401	*	3.35174	2.15433	3.99693	-1.29765	0.0102922	0.0255444	4152	ENSG00000106123	142552792	142568847	+	upstream	-485	85	NearestLocation	EPHB6
chr4	120059236	120059636	401	*	5.29064	4.87559	5.61258	-0.692804	0.0103102	0.0255754	3245	ENSG00000172399	120056939	120108944	+	inside	2297	2297	NearestLocation	MYOZ2
chr1	183440993	183441393	401	*	6.0719	5.78494	6.31114	-0.512285	0.0103276	0.025605	342	ENSG00000116698	183441351	183567381	+	overlapStart	-358	42	NearestLocation	SMG7
chr1	28240993	28241393	401	*	4.2705	3.53307	4.75612	-1.03415	0.0103348	0.0256092	74	ENSG00000117748	28218035	28241257	-	overlapStart	264	136	NearestLocation	RPA2
chr8	51210900	51211300	401	*	3.35826	2.15433	4.00526	-1.29796	0.0103533	0.025626	4269	ENSG00000253849	51293575	51294835	+	upstream	-82675	82275	NearestLocation	NA
chr17	20592462	20592862	401	*	4.72947	4.1529	5.1403	-0.878074	0.0103562	0.025626	1832	ENSG00000264874	20613738	20613846	-	downstream	21384	20876	NearestLocation	NA
chr1	214280740	214281140	401	*	4.26313	3.53086	4.74654	-1.02561	0.0103607	0.025626	405	ENSG00000272167	214202236	214204109	-	upstream	-76631	76631	NearestLocation	NA
chr11	102014460	102014860	401	*	3.99247	3.14861	4.52139	-1.1102	0.0103635	0.025626	898	ENSG00000137693	101981192	102104154	+	inside	33268	33268	NearestLocation	YAP1
chr17	14101356	14101756	401	*	4.09853	3.28976	4.61367	-1.0844	0.0103764	0.0256443	1820	ENSG00000231595	14113805	14121239	+	upstream	-12449	12049	NearestLocation	NA
chr10	88828042	88828442	401	*	4.48642	3.83098	4.93545	-0.959015	0.0104209	0.0257405	633	ENSG00000122376	88853918	88951225	+	upstream	-25876	25476	NearestLocation	SHLD2
chr1	25020861	25021261	401	*	6.21415	5.9396	6.44471	-0.487116	0.0104443	0.0257847	60	ENSG00000238986	24993474	24993578	-	upstream	-27283	27283	NearestLocation	NA
chr2	15419337	15419737	401	*	4.26148	3.53307	4.74322	-1.02427	0.0104627	0.0257968	2183	ENSG00000229087	15537559	15537906	-	downstream	118569	117822	NearestLocation	NA
chr6	132172470	132172870	401	*	3.87244	2.99851	4.4128	-1.12935	0.0104639	0.0257968	3869	ENSG00000237115	132147121	132149553	-	upstream	-22917	22917	NearestLocation	LOC100421775
chr6	167089940	167090340	401	*	4.07749	3.28846	4.58467	-1.07096	0.0104658	0.0257968	3949	ENSG00000235008	167114582	167116327	-	downstream	26387	24242	NearestLocation	NA
chr3	15347059	15347459	401	*	5.5301	5.1529	5.82883	-0.636655	0.0104779	0.025813	2802	ENSG00000238891	15358127	15358229	+	upstream	-11068	10668	NearestLocation	NA
chr8	135746948	135747348	401	*	4.61906	4.00011	5.0508	-0.921267	0.010488	0.0258243	4395	ENSG00000272456	135735190	135736192	+	downstream	11758	10756	NearestLocation	NA
chr8	8915724	8916124	401	*	4.25932	3.52976	4.74156	-1.02392	0.0105003	0.0258409	4191	ENSG00000252543	8916049	8916140	-	overlapEnd	416	16	NearestLocation	NA
chr13	61340071	61340471	401	*	4.07862	3.29236	4.58467	-1.07056	0.0105107	0.0258529	1286	ENSG00000206854	61363694	61363795	+	upstream	-23623	23223	NearestLocation	NA
chr7	122694758	122695158	401	*	4.56173	3.91802	5.00526	-0.945189	0.010549	0.0259335	4117	ENSG00000226680	122709303	122743643	-	downstream	48885	14145	NearestLocation	NA
chr16	49615621	49616021	401	*	3.48704	2.41594	4.09494	-1.24085	0.0105728	0.0259783	1688	ENSG00000260089	49551673	49552512	-	upstream	-63109	63109	NearestLocation	ADAM3B
chr22	19710812	19711212	401	*	4.07731	3.29236	4.58282	-1.06962	0.0106291	0.0261028	2706	ENSG00000203618	19710468	19712294	+	inside	344	344	NearestLocation	GP1BB
chrX	128381712	128382112	401	*	3.48249	2.41355	4.08972	-1.23963	0.0106535	0.0261489	4649	ENSG00000226339	128542359	128542598	+	upstream	-160647	160247	NearestLocation	NA
chr8	74101011	74101411	401	*	3.48107	2.41594	4.08711	-1.23885	0.0107061	0.0262642	4293	ENSG00000253564	74128164	74128862	-	downstream	27851	26753	NearestLocation	NA
chr20	53389397	53389797	401	*	3.48647	2.41355	4.09494	-1.23976	0.0107117	0.0262643	2641	ENSG00000252089	53476227	53476351	-	downstream	86954	86430	NearestLocation	RNU4ATAC7P
chr8	17466192	17466592	401	*	4.08182	3.28976	4.59023	-1.07079	0.0107368	0.026312	4215	ENSG00000104213	17433942	17501580	+	inside	32250	32250	NearestLocation	PDGFRL
chr5	104369302	104369702	401	*	4.08717	3.29106	4.59722	-1.0787	0.0107493	0.0263286	3504	ENSG00000232159	104435174	104435799	+	upstream	-65872	65472	NearestLocation	RAB9BP1
chr6	73385136	73385536	401	*	4.25816	3.52976	4.7399	-1.02243	0.0107683	0.026341	3767	ENSG00000233844	73340223	73388282	+	inside	44913	2746	NearestLocation	NA
chr8	74335398	74335798	401	*	4.25816	3.52976	4.7399	-1.02243	0.0107683	0.026341	4294	ENSG00000253302	74332239	74353761	+	inside	3159	3159	NearestLocation	STAU2-AS1
chr14	88445996	88446396	401	*	3.00639	0.823805	3.83804	-1.40849	0.0107712	0.026341	1452	ENSG00000054983	88304164	88460009	-	inside	14013	13613	NearestLocation	GALC
chr1	1568831	1569231	401	*	4.17312	3.41832	4.66613	-1.04477	0.0108182	0.0264376	4	ENSG00000189409	1567474	1570639	+	inside	1357	1357	NearestLocation	MMP23B
chr14	91527280	91527680	401	*	4.25733	3.53086	4.73823	-1.02174	0.0108247	0.0264376	1458	ENSG00000100784	91336799	91526980	-	upstream	-300	300	NearestLocation	RPS6KA5
chr17	34040420	34040820	401	*	4.81807	4.29106	5.20323	-0.826699	0.0108278	0.0264376	1847	ENSG00000239520	34046907	34047461	+	upstream	-6487	6087	NearestLocation	NA
chr17	52599237	52599637	401	*	3.4805	2.41355	4.08711	-1.23773	0.0108476	0.0264723	1879	ENSG00000261965	52555157	52555529	+	downstream	44080	43708	NearestLocation	NA
chr10	44756689	44757089	401	*	4.17576	3.41475	4.67137	-1.04595	0.0108714	0.0265163	550	ENSG00000237590	44755050	44757261	-	inside	572	172	NearestLocation	NA
chr6	136424759	136425159	401	*	4.41086	3.73739	4.8682	-0.973487	0.0109963	0.0268057	3879	ENSG00000227844	136364990	136393965	-	upstream	-30794	30794	NearestLocation	NA
chr7	135771344	135771744	401	*	4.41116	3.73834	4.8682	-0.97336	0.0110148	0.0268057	4141	ENSG00000232053	135777673	136122174	+	upstream	-6329	5929	NearestLocation	NA
chr11	61276537	61276937	401	*	3.73317	2.83098	4.284	-1.14694	0.0110245	0.0268057	820	ENSG00000204950	61276272	61278482	+	inside	265	265	NearestLocation	LRRC10B
chr11	84787503	84787903	401	*	3.73317	2.83098	4.284	-1.14694	0.0110245	0.0268057	872	ENSG00000213305	84731829	84732699	-	upstream	-54804	54804	NearestLocation	HNRNPCP6
chr19	12000748	12001148	401	*	3.73317	2.83098	4.284	-1.14694	0.0110245	0.0268057	2070	ENSG00000198429	11998599	12025144	+	inside	2149	2149	NearestLocation	ZNF69
chr8	8966334	8966734	401	*	3.73317	2.83098	4.284	-1.14694	0.0110245	0.0268057	4194	ENSG00000254340	8998934	9002945	+	upstream	-32600	32200	NearestLocation	NA
chr14	53925029	53925429	401	*	4.3416	3.63629	4.81325	-1.00148	0.0110396	0.0268285	1400	ENSG00000226132	54079442	54080123	+	upstream	-154413	154013	NearestLocation	RPS3AP46
chr10	21180302	21180702	401	*	5.2512	4.83053	5.57649	-0.694937	0.0111057	0.0269626	507	ENSG00000230112	21130304	21130489	+	downstream	49998	49813	NearestLocation	NA
chr7	124120102	124120502	401	*	4.66351	4.07928	5.07818	-0.886177	0.0111074	0.0269626	4125	ENSG00000213296	124120578	124121449	+	upstream	-476	76	NearestLocation	RPS2P31
chr12	97078746	97079146	401	*	3.73269	2.82919	4.284	-1.14643	0.0111174	0.0269626	1138	ENSG00000188596	96883349	97269333	+	inside	195397	190187	NearestLocation	CFAP54
chr15	64271043	64271443	401	*	3.85177	3.00011	4.38369	-1.11304	0.0111237	0.0269626	1564	ENSG00000259351	64220473	64228152	+	downstream	50570	42891	NearestLocation	LOC101928988
chr3	188008359	188008759	401	*	3.85177	3.00011	4.38369	-1.11304	0.0111237	0.0269626	3062	ENSG00000213132	187896331	187898598	+	downstream	112028	109761	NearestLocation	NA
chr17	9704851	9705251	401	*	4.40982	3.73739	4.86668	-0.972592	0.0111465	0.027004	1804	ENSG00000184544	9674751	9694614	-	upstream	-10237	10237	NearestLocation	DHRS7C
chr1	185501992	185502392	401	*	3.85023	3.00011	4.38156	-1.11242	0.011181	0.0270276	350	ENSG00000228309	185527504	185597659	-	downstream	95667	25112	NearestLocation	LINC01350
chr12	129349378	129349778	401	*	3.85023	3.00011	4.38156	-1.11242	0.011181	0.0270276	1201	ENSG00000151948	129337972	129469509	+	inside	11406	11406	NearestLocation	GLT1D1
chr17	4046296	4046696	401	*	3.98233	3.15147	4.5062	-1.09595	0.0111851	0.0270276	1790	ENSG00000074755	3907739	4046314	-	overlapStart	18	18	NearestLocation	ZZEF1
chr5	14664474	14664874	401	*	3.98233	3.15147	4.5062	-1.09595	0.0111851	0.0270276	3378	ENSG00000154124	14664773	14699820	+	overlapStart	-299	101	NearestLocation	OTULIN
chr8	119427814	119428214	401	*	5.00263	4.53142	5.35724	-0.761043	0.0111861	0.0270276	4367	ENSG00000225885	119294378	119412844	+	downstream	133436	14970	NearestLocation	NA
chr19	6460447	6460847	401	*	3.85067	3.0017	4.38156	-1.11231	0.0111913	0.0270276	2059	ENSG00000130545	6463788	6467232	+	upstream	-3341	2941	NearestLocation	CRB3
chr18	7749610	7750010	401	*	3.85375	3.0017	4.38582	-1.1129	0.0112021	0.0270276	1949	ENSG00000266767	7741308	7754829	-	inside	5219	4819	NearestLocation	NA
chr9	17824272	17824672	401	*	3.73198	2.83276	4.28172	-1.14553	0.0112026	0.0270276	4437	ENSG00000228810	17589159	17591316	-	upstream	-232956	232956	NearestLocation	NA
chr14	20923299	20923699	401	*	4.66087	4.07928	5.07423	-0.884928	0.0112245	0.0270665	1357	ENSG00000100823	20923350	20925927	+	overlapStart	-51	51	NearestLocation	APEX1
chr6	164281719	164282119	401	*	3.73651	2.83098	4.28856	-1.14627	0.0112397	0.0270891	3944	ENSG00000266128	164261593	164261882	+	downstream	20126	19837	NearestLocation	RN7SL366P
chr6	133135200	133135600	401	*	3.72982	2.83098	4.27943	-1.14482	0.0112781	0.0271606	3872	ENSG00000112306	133135580	133138703	+	overlapStart	-380	20	NearestLocation	RPS12
chr7	87505714	87506114	401	*	4.20927	3.41951	4.71674	-1.07204	0.011281	0.0271606	4070	ENSG00000075303	87462883	87505672	-	upstream	-42	42	NearestLocation	SLC25A40
chr2	15874966	15875366	401	*	3.96176	3.1529	4.47693	-1.08226	0.0113248	0.027252	2184	ENSG00000231031	15830906	15884463	+	inside	44060	9097	NearestLocation	LINC01804
chr10	75408794	75409194	401	*	4.95858	4.47626	5.31941	-0.775513	0.0113477	0.027293	601	ENSG00000271848	75413797	75434477	+	upstream	-5003	4603	NearestLocation	NA
chr12	117506395	117506795	401	*	3.60577	2.63935	4.17937	-1.18217	0.0113844	0.027367	1178	ENSG00000088992	117476728	117537284	-	inside	30889	29667	NearestLocation	TESC
chr2	28974212	28974612	401	*	3.85485	3.00011	4.38795	-1.11226	0.0113984	0.0273806	2207	ENSG00000213639	28974506	29025806	+	overlapStart	-294	106	NearestLocation	PPP1CB
chr1	12039825	12040225	401	*	4.24856	3.53197	4.72517	-1.00979	0.0114018	0.0273806	34	ENSG00000116688	12040238	12073571	+	upstream	-413	13	NearestLocation	MFN2
chr1	12039825	12040225	401	*	4.24856	3.53197	4.72517	-1.00979	0.0114018	0.0273806	34	LRG_255	12040238	12073572	+	upstream	-413	13	NearestLocation	NA
chr15	71491561	71491961	401	*	3.85529	3.0017	4.38795	-1.11214	0.0114101	0.0273866	1594	ENSG00000259964	71439989	71481381	-	upstream	-10180	10180	NearestLocation	THSD4-AS1
chr3	38537689	38538089	401	*	4.41146	3.7393	4.8682	-0.971932	0.0114206	0.0273976	2839	ENSG00000157036	38537618	38583652	+	inside	71	71	NearestLocation	EXOG
chr3	53972992	53973392	401	*	3.60159	2.63731	4.17445	-1.18127	0.0114375	0.0274242	2869	ENSG00000113811	53918437	53926015	-	upstream	-46977	46977	NearestLocation	SELENOK
chr2	201988675	201989075	401	*	4.33176	3.63935	4.79766	-0.98964	0.011451	0.0274298	2481	ENSG00000003402	201980827	202041410	+	inside	7848	7848	NearestLocation	CFLAR
chr14	105048998	105049398	401	*	3.96135	3.15147	4.47693	-1.0817	0.0114516	0.0274298	1484	ENSG00000184601	105046021	105056852	+	inside	2977	2977	NearestLocation	C14orf180
chr13	39337687	39338087	401	*	3.85419	3.00328	4.38582	-1.11143	0.0114717	0.0274638	1242	ENSG00000252795	39353561	39353653	+	upstream	-15874	15474	NearestLocation	RNU6-56P
chr6	12636030	12636430	401	*	4.17699	3.41475	4.67312	-1.04377	0.0114974	0.0275112	3673	ENSG00000234015	12583147	12585636	-	upstream	-50394	50394	NearestLocation	LINC02530
chr6	53826777	53827177	401	*	4.54486	3.91802	4.98039	-0.929542	0.011513	0.0275345	3748	ENSG00000236740	53794820	53862465	+	inside	31957	31957	NearestLocation	LOC101927189
chr14	24058270	24058670	401	*	4.06396	3.29106	4.56451	-1.0547	0.0115342	0.0275348	1367	ENSG00000092051	24037244	24048009	-	upstream	-10261	10261	NearestLocation	JPH4
chr20	6362316	6362716	401	*	4.06396	3.29106	4.56451	-1.0547	0.0115342	0.0275348	2566	ENSG00000229876	6427370	6509106	+	upstream	-65054	64654	NearestLocation	CASC20
chr6	10587863	10588263	401	*	4.4143	3.73834	4.87276	-0.972833	0.0115349	0.0275348	3667	ENSG00000217181	10574982	10575460	-	upstream	-12403	12403	NearestLocation	RPL21P63
chr15	74449415	74449815	401	*	3.60708	2.63731	4.18182	-1.18148	0.0115409	0.0275348	1598	ENSG00000129009	74466012	74469213	+	upstream	-16597	16197	NearestLocation	ISLR
chr11	9596851	9597251	401	*	4.24973	3.53197	4.72686	-1.00963	0.0115475	0.0275348	741	ENSG00000166483	9595228	9615004	+	inside	1623	1623	NearestLocation	WEE1
chr2	109335632	109336032	401	*	3.96278	3.15147	4.47893	-1.0816	0.0115486	0.0275348	2334	ENSG00000153201	109335937	109402267	+	overlapStart	-305	95	NearestLocation	RANBP2
chr1	174081974	174082374	401	*	4.91798	4.41594	5.2897	-0.792557	0.0115569	0.0275406	328	ENSG00000225713	174059274	174059612	-	upstream	-22362	22362	NearestLocation	RPL30P1
chr22	43253237	43253637	401	*	3.6063	2.64139	4.17937	-1.18052	0.0116276	0.0276809	2767	ENSG00000242247	43192508	43254112	-	inside	875	475	NearestLocation	ARFGAP3
chrX	27096544	27096944	401	*	3.6063	2.64139	4.17937	-1.18052	0.0116276	0.0276809	4624	ENSG00000242021	27061024	27194415	-	inside	97871	35520	NearestLocation	NA
chr1	206110010	206110410	401	*	4.66527	4.07928	5.08081	-0.885577	0.0116466	0.0277118	384	ENSG00000196550	206136916	206155151	+	upstream	-26906	26506	NearestLocation	FAM72A
chr1	85809504	85809904	401	*	3.60028	2.63935	4.17198	-1.1794	0.0116668	0.0277191	190	ENSG00000264380	85750293	85750356	+	downstream	59211	59148	NearestLocation	NA
chr16	88155028	88155428	401	*	3.60028	2.63935	4.17198	-1.1794	0.0116668	0.0277191	1764	ENSG00000205037	88121647	88134591	-	upstream	-20437	20437	NearestLocation	LOC400553
chr11	121163183	121163583	401	*	3.84957	3.00328	4.37942	-1.10939	0.0116674	0.0277191	926	ENSG00000109929	121163162	121179403	+	inside	21	21	NearestLocation	SC5D
chr10	51262725	51263125	401	*	3.7377	2.82919	4.29084	-1.14399	0.0117022	0.0277741	560	ENSG00000272225	51253787	51262426	-	upstream	-299	299	NearestLocation	NA
chr7	80506131	80506531	401	*	4.81592	4.29171	5.1996	-0.824151	0.0117025	0.0277741	4066	ENSG00000075223	80371854	80551675	-	inside	45544	45144	NearestLocation	SEMA3C
chr4	90819405	90819805	401	*	3.84714	3.00011	4.37728	-1.10887	0.0117211	0.0277961	3200	ENSG00000138722	90800683	90875780	+	inside	18722	18722	NearestLocation	MMRN1
chr6	93274002	93274402	401	*	3.73866	2.83276	4.29084	-1.14377	0.0117237	0.0277961	3804	ENSG00000265419	93354459	93354526	+	upstream	-80457	80057	NearestLocation	NA
chr19	15439106	15439506	401	*	4.24672	3.52976	4.72349	-1.00821	0.0117544	0.0278547	2081	ENSG00000141867	15347647	15443356	-	inside	4250	3850	NearestLocation	BRD4
chr11	80123578	80123978	401	*	4.06091	3.28976	4.56075	-1.05302	0.0117638	0.0278628	862	ENSG00000254434	80032664	80038955	-	upstream	-84623	84623	NearestLocation	NA
chr14	24583619	24584019	401	*	4.08275	3.28846	4.59207	-1.06656	0.0117878	0.0279055	1368	ENSG00000129535	24549316	24584223	-	inside	604	204	NearestLocation	NRL
chr12	14160593	14160993	401	*	4.85222	4.28976	5.25587	-0.857673	0.0117957	0.0279102	992	ENSG00000273079	13693165	14133053	-	upstream	-27540	27540	NearestLocation	GRIN2B
chr14	71468414	71468814	401	*	3.73747	2.83455	4.28856	-1.1429	0.0118063	0.0279211	1432	ENSG00000258930	71498403	71498687	-	downstream	30273	29589	NearestLocation	NA
chr8	99027607	99028007	401	*	3.60812	2.64139	4.18182	-1.17956	0.0118244	0.0279498	4335	ENSG00000245970	99053954	99056349	+	upstream	-26347	25947	NearestLocation	NA
chr5	104532049	104532449	401	*	3.33023	2.15433	3.96936	-1.27369	0.0119121	0.0281362	3505	ENSG00000253584	104253193	104582065	-	inside	50016	49616	NearestLocation	NA
chr3	124781829	124782229	401	*	5.16906	4.73834	5.50031	-0.708002	0.0119154	0.0281362	2970	ENSG00000252642	124777148	124777282	-	upstream	-4547	4547	NearestLocation	RNA5SP137
chr15	89148893	89149293	401	*	3.32802	2.15433	3.96652	-1.2726	0.0119996	0.0283208	1625	ENSG00000249487	89128802	89148341	-	upstream	-552	552	NearestLocation	LINC01586
chr1	227181451	227181851	401	*	4.16117	3.41475	4.65063	-1.02979	0.0120236	0.0283631	429	ENSG00000233706	227179841	227180907	+	downstream	1610	544	NearestLocation	NA
chr2	70331720	70332120	401	*	3.33181	2.15147	3.9722	-1.27299	0.012033	0.028371	2282	ENSG00000226505	70321026	70330352	-	upstream	-1368	1368	NearestLocation	NA
chr18	62723814	62724214	401	*	4.47367	3.83098	4.91673	-0.942857	0.0120506	0.0283981	2031	ENSG00000263863	62773109	62792946	-	downstream	69132	48895	NearestLocation	NA
chr1	120863429	120863829	401	*	4.05996	3.29106	4.55886	-1.05083	0.0121677	0.0286594	244	ENSG00000268993	120880883	120881270	+	upstream	-17454	17054	NearestLocation	RPL22P6
chr3	42077874	42078274	401	*	4.85928	4.35423	5.23263	-0.797269	0.0121892	0.0286768	2846	ENSG00000229339	42092673	42093186	-	downstream	15312	14399	NearestLocation	NA
chr10	51355660	51356060	401	*	4.08106	3.28715	4.59023	-1.06446	0.0121911	0.0286768	561	ENSG00000225784	51287081	51371070	-	inside	15410	15010	NearestLocation	NA
chr5	56411991	56412391	401	*	4.15494	3.41475	4.64174	-1.02714	0.0121935	0.0286768	3430	ENSG00000250480	56416623	56418451	+	upstream	-4632	4232	NearestLocation	NA
chr19	53630071	53630471	401	*	3.46142	2.41594	4.06123	-1.21695	0.0122267	0.0287405	2147	ENSG00000170954	53611132	53636330	-	inside	6259	5859	NearestLocation	ZNF415
chr1	31437581	31437981	401	*	4.1585	3.41832	4.6453	-1.02749	0.0122553	0.0287931	83	ENSG00000200181	31441011	31441083	-	downstream	3502	3030	NearestLocation	NA
[truncated: 515 more rows]
