# Supplementary material for: GATA4 regulates mitochondrial biogenesis and functions during cardiac development and rescues cardiac and mitochondrial functions impaired by TKIs
Source: Research Square preprint supplement (doi:10.21203/rs.3.rs-2343653/v1), 2022-12-09
Supplement: Supplementary file 4 [file e0018989bd86b4d956672f8a.xlsx]

## Sheet: GATA4_ChIP_day8
seqnames	start	end	width	strand	peak	feature	start_position	end_position	feature_strand	insideFeature	distancetoFeature	shortestDistance	fromOverlappingOrNearest	symbol
chr1	690208	690407	200	*	1	ENSG00000223181	693613	693716	-	downstream	3508	3206	NearestLocation	RNU6-1199P
chr1	767026	767261	236	*	2	ENSG00000228794	762988	794826	+	inside	4038	4038	NearestLocation	LINC01128
chr1	940490	940705	216	*	3	ENSG00000231702	943456	943609	-	downstream	3119	2751	NearestLocation	NA
chr1	1440257	1440501	245	*	4	ENSG00000197785	1447531	1470067	+	upstream	-7274	7030	NearestLocation	ATAD3A
chr1	1568918	1569138	221	*	5	ENSG00000189409	1567474	1570639	+	inside	1444	1444	NearestLocation	MMP23B
chr1	1632088	1632382	295	*	6	ENSG00000215914	1631369	1633249	+	inside	719	719	NearestLocation	MMP23A
chr1	1778543	1778783	241	*	7	ENSG00000078369	1716729	1822495	-	inside	43952	43712	NearestLocation	GNB1
chr1	1814924	1815144	221	*	8	ENSG00000078369	1716729	1822495	-	inside	7571	7351	NearestLocation	GNB1
chr1	2066912	2067183	272	*	9	ENSG00000271806	2072523	2076718	-	downstream	9806	5340	NearestLocation	NA
chr1	3087593	3087806	214	*	10	ENSG00000226286	3049491	3050273	-	upstream	-37320	37320	NearestLocation	NA
chr1	3208816	3209148	333	*	11	ENSG00000272235	3223200	3226660	-	downstream	17844	14052	NearestLocation	NA
chr1	3265647	3266032	386	*	12	ENSG00000272235	3223200	3226660	-	upstream	-38987	38987	NearestLocation	NA
chr1	3843756	3843998	243	*	13	ENSG00000236423	3816936	3833789	+	downstream	26820	9967	NearestLocation	LINC01134
chr1	4221923	4222214	292	*	14	ENSG00000229280	4235588	4235959	-	downstream	14036	13374	NearestLocation	EEF1DP6
chr1	5175694	5175962	269	*	15	ENSG00000231510	5146519	5150959	-	upstream	-24735	24735	NearestLocation	NA
chr1	5812471	5812697	227	*	16	ENSG00000216045	5875931	5876019	-	downstream	63548	63234	NearestLocation	NA
chr1	6112578	6113066	489	*	17	ENSG00000268332	6100630	6101399	-	upstream	-11179	11179	NearestLocation	NA
chr1	6583747	6584038	292	*	18	ENSG00000171680	6526152	6580121	-	upstream	-3626	3626	NearestLocation	PLEKHG5
chr1	6732675	6732986	312	*	19	ENSG00000007923	6694228	6761984	-	inside	29309	28998	NearestLocation	DNAJC11
chr1	6985024	6985223	200	*	20	ENSG00000237365	7068436	7074339	-	downstream	89315	83213	NearestLocation	NA
chr1	7577946	7578313	368	*	21	ENSG00000225126	7501156	7501614	-	upstream	-76332	76332	NearestLocation	NA
chr1	7614899	7615160	262	*	22	ENSG00000225126	7501156	7501614	-	upstream	-113285	113285	NearestLocation	NA
chr1	7646269	7646516	248	*	23	ENSG00000270171	7753184	7754904	-	downstream	108635	106668	NearestLocation	NA
chr1	7682022	7682387	366	*	24	ENSG00000270171	7753184	7754904	-	downstream	72882	70797	NearestLocation	NA
chr1	8075072	8075434	363	*	25	ENSG00000116285	8064464	8086368	-	inside	11296	10608	NearestLocation	ERRFI1
chr1	8427645	8428018	374	*	26	ENSG00000252254	8388127	8388239	+	downstream	39518	39406	NearestLocation	NA
chr1	8456889	8457195	307	*	27	ENSG00000232912	8484705	8494898	+	upstream	-27816	27510	NearestLocation	NA
chr1	8484859	8485068	210	*	28	ENSG00000232912	8484705	8494898	+	inside	154	154	NearestLocation	NA
chr1	8602286	8602519	234	*	29	ENSG00000270282	8572712	8573080	+	downstream	29574	29206	NearestLocation	NA
chr1	8621195	8621457	263	*	30	ENSG00000270282	8572712	8573080	+	downstream	48483	48115	NearestLocation	NA
chr1	8631667	8631939	273	*	31	ENSG00000270282	8572712	8573080	+	downstream	58955	58587	NearestLocation	NA
chr1	8686478	8686866	389	*	32	ENSG00000270282	8572712	8573080	+	downstream	113766	113398	NearestLocation	NA
chr1	8695928	8696164	237	*	33	ENSG00000234619	8810489	8811146	+	upstream	-114561	114325	NearestLocation	RPL7P11
chr1	8766998	8767374	377	*	34	ENSG00000234619	8810489	8811146	+	upstream	-43491	43115	NearestLocation	RPL7P11
chr1	9170961	9171269	309	*	35	ENSG00000180758	9160364	9189229	-	inside	18268	10597	NearestLocation	GPR157
chr1	9294199	9294469	271	*	36	ENSG00000049239	9294834	9331396	+	upstream	-635	365	NearestLocation	H6PD
chr1	9313855	9314061	207	*	37	ENSG00000049239	9294834	9331396	+	inside	19021	17335	NearestLocation	H6PD
chr1	9371578	9371960	383	*	38	ENSG00000171621	9352939	9429591	+	inside	18639	18639	NearestLocation	SPSB1
chr1	9470987	9471186	200	*	39	ENSG00000252956	9497728	9497837	-	downstream	26850	26542	NearestLocation	RNA5SP40
chr1	9960349	9960680	332	*	40	ENSG00000178585	9908334	9970394	-	inside	10045	9714	NearestLocation	CTNNBIP1
chr1	9982420	9982619	200	*	41	ENSG00000178585	9908334	9970394	-	upstream	-12026	12026	NearestLocation	CTNNBIP1
chr1	10215483	10215693	211	*	42	ENSG00000201746	10223326	10223432	+	upstream	-7843	7633	NearestLocation	RNU6-828P
chr1	11447490	11447755	266	*	43	ENSG00000224338	11485314	11485878	-	downstream	38388	37559	NearestLocation	MTCYBP45
chr1	11771204	11771497	294	*	44	ENSG00000162490	11751786	11785914	+	inside	19418	14417	NearestLocation	DRAXIN
chr1	11852680	11852931	252	*	45	ENSG00000177553	11837134	11839676	-	upstream	-13004	13004	NearestLocation	C1orf167-AS1
chr1	11907819	11908335	517	*	46	ENSG00000175206	11905766	11908402	-	inside	583	67	NearestLocation	NPPA
chr1	11942894	11943241	348	*	47	ENSG00000224904	11937827	11940463	+	downstream	5067	2431	NearestLocation	SBF1P2
chr1	12074845	12075290	446	*	48	ENSG00000270914	12077273	12077365	-	downstream	2520	1983	NearestLocation	NA
chr1	12098777	12099145	369	*	49	ENSG00000243539	12096799	12097071	-	upstream	-1706	1706	NearestLocation	RN7SL649P
chr1	12384599	12384798	200	*	50	ENSG00000048707	12290124	12572099	+	inside	94475	94475	NearestLocation	VPS13D
chr1	12493705	12493929	225	*	51	ENSG00000239149	12567300	12567451	+	upstream	-73595	73371	NearestLocation	SNORA59B;SNORA59A
chr1	12555754	12556003	250	*	52	ENSG00000239149	12567300	12567451	+	upstream	-11546	11297	NearestLocation	SNORA59B;SNORA59A
chr1	12664408	12664699	292	*	53	ENSG00000162496	12627939	12677737	-	inside	13329	13038	NearestLocation	DHRS3
chr1	14944326	14944543	218	*	54	ENSG00000189337	14925200	15444539	+	inside	19126	19126	NearestLocation	KAZN
chr1	15093744	15094045	302	*	55	ENSG00000235829	15018625	15019109	-	upstream	-74635	74635	NearestLocation	NA
chr1	15109330	15109529	200	*	56	ENSG00000235829	15018625	15019109	-	upstream	-90221	90221	NearestLocation	NA
chr1	15129187	15129389	203	*	57	ENSG00000235829	15018625	15019109	-	upstream	-110078	110078	NearestLocation	NA
chr1	15466325	15466633	309	*	58	ENSG00000175147	15442448	15478960	-	inside	12635	12327	NearestLocation	TMEM51-AS1
chr1	15553199	15553398	200	*	59	ENSG00000142621	15573768	15726779	+	upstream	-20569	20370	NearestLocation	FHAD1
chr1	15819184	15819458	275	*	60	ENSG00000215704	15792404	15817895	+	downstream	26780	1289	NearestLocation	CELA2B
chr1	16088101	16088371	271	*	61	ENSG00000162458	16083102	16113089	+	inside	4999	4999	NearestLocation	FBLIM1
chr1	16142098	16142338	241	*	62	ENSG00000233954	16133679	16134194	-	upstream	-7904	7904	NearestLocation	UQCRHL
chr1	16176508	16176780	273	*	63	ENSG00000179743	16160560	16174642	-	upstream	-1866	1866	NearestLocation	FLJ37453
chr1	16470370	16470667	298	*	64	ENSG00000227959	16481706	16483824	+	upstream	-11336	11039	NearestLocation	NA
chr1	16593029	16593423	395	*	65	ENSG00000233929	16567708	16567893	-	upstream	-25136	25136	NearestLocation	NA
chr1	16693400	16693696	297	*	66	ENSG00000226457	16695645	16696025	-	downstream	2625	1949	NearestLocation	RPL22P3
chr1	16833460	16833742	283	*	67	ENSG00000206652	16840617	16840780	-	downstream	7320	6875	NearestLocation	RNU1-1
chr1	16866951	16867336	386	*	68	ENSG00000268674	16865561	16866070	+	downstream	1390	881	NearestLocation	NA
chr1	16891207	16891470	264	*	69	ENSG00000225710	16875146	16879026	-	upstream	-12181	12181	NearestLocation	NA
chr1	16891922	16892154	233	*	70	ENSG00000225710	16875146	16879026	-	upstream	-12896	12896	NearestLocation	NA
chr1	16892464	16892819	356	*	71	ENSG00000225710	16875146	16879026	-	upstream	-13438	13438	NearestLocation	NA
chr1	16892983	16893845	863	*	72	ENSG00000225710	16875146	16879026	-	upstream	-13957	13957	NearestLocation	NA
chr1	16965903	16966134	232	*	73	ENSG00000215908	16944751	16971178	-	inside	5275	5044	NearestLocation	CROCCP2
chr1	16992909	16993611	703	*	74	ENSG00000207513	16993280	16993443	-	includeFeature	534	168	NearestLocation	RNU1-3
chr1	17001393	17001898	506	*	75	ENSG00000237847	16999498	17000007	+	downstream	1895	1386	NearestLocation	NA
chr1	17058915	17059424	510	*	76	ENSG00000268991	17060447	17060956	-	downstream	2041	1023	NearestLocation	NA
chr1	17066843	17067219	377	*	77	ENSG00000207389	17067011	17067174	+	includeFeature	-168	45	NearestLocation	RNU1-4
chr1	17193583	17194056	474	*	78	ENSG00000228549	17197440	17200587	+	upstream	-3857	3384	NearestLocation	LOC112267871
chr1	17216079	17216294	216	*	79	ENSG00000238142	17215033	17216144	-	overlapStart	65	65	NearestLocation	LOC105376805
chr1	17222339	17222613	275	*	80	ENSG00000207005	17222475	17222638	+	overlapStart	-136	25	NearestLocation	RNU1-2
chr1	17222753	17223041	289	*	81	ENSG00000207005	17222475	17222638	+	downstream	278	115	NearestLocation	RNU1-2
chr1	17803947	17804159	213	*	82	ENSG00000239020	17776259	17776359	+	downstream	27688	27588	NearestLocation	NA
chr1	18201147	18201381	235	*	83	ENSG00000117148	18081808	18153558	+	downstream	119339	47589	NearestLocation	ACTL8
chr1	19734331	19734574	244	*	84	ENSG00000240490	19750878	19751163	+	upstream	-16547	16304	NearestLocation	NA
chr1	19772445	19772658	214	*	85	ENSG00000240490	19750878	19751163	+	downstream	21567	21282	NearestLocation	NA
chr1	19775500	19775829	330	*	86	ENSG00000240490	19750878	19751163	+	downstream	24622	24337	NearestLocation	NA
chr1	20301495	20301726	232	*	87	ENSG00000242688	20297462	20297760	+	downstream	4033	3735	NearestLocation	RN7SL304P
chr1	20987834	20988103	270	*	88	ENSG00000244038	20978270	20988000	-	overlapStart	166	103	NearestLocation	DDOST
chr1	21384655	21384854	200	*	89	ENSG00000236073	21400132	21400246	-	downstream	15591	15278	NearestLocation	NA
chr1	21589074	21589322	249	*	90	ENSG00000236936	21592575	21593744	+	upstream	-3501	3253	NearestLocation	NA
chr1	21606811	21607054	244	*	91	ENSG00000231105	21619783	21626267	+	upstream	-12972	12729	NearestLocation	ECE1-AS1
chr1	21647542	21647938	397	*	92	ENSG00000117298	21543740	21671997	-	inside	24455	24059	NearestLocation	ECE1
chr1	21812206	21812712	507	*	93	ENSG00000162551	21835858	21904905	+	upstream	-23652	23146	NearestLocation	ALPL
chr1	21864781	21865063	283	*	94	ENSG00000162551	21835858	21904905	+	inside	28923	28923	NearestLocation	ALPL
chr1	22351586	22351895	310	*	95	ENSG00000218510	22351681	22357716	+	overlapStart	-95	95	NearestLocation	LINC00339
chr1	22668613	22668932	320	*	96	ENSG00000234397	22649333	22649824	-	upstream	-18789	18789	NearestLocation	NA
chr1	22727015	22727457	443	*	97	ENSG00000184677	22778344	22857650	+	upstream	-51329	50887	NearestLocation	ZBTB40
chr1	22769889	22770088	200	*	98	ENSG00000184677	22778344	22857650	+	upstream	-8455	8256	NearestLocation	ZBTB40
chr1	22814375	22814593	219	*	99	ENSG00000237200	22843967	22846201	+	upstream	-29592	29374	NearestLocation	NA
chr1	22815011	22815267	257	*	100	ENSG00000237200	22843967	22846201	+	upstream	-28956	28700	NearestLocation	NA
chr1	23012277	23012476	200	*	101	ENSG00000133216	23037332	23241818	+	upstream	-25055	24856	NearestLocation	EPHB2
chr1	23067613	23068069	457	*	102	ENSG00000216157	23075310	23075404	-	downstream	7791	7241	NearestLocation	NA
chr1	23076961	23077257	297	*	103	ENSG00000216157	23075310	23075404	-	upstream	-1557	1557	NearestLocation	NA
chr1	23345823	23346198	376	*	104	ENSG00000004487	23345941	23410182	+	overlapStart	-118	118	NearestLocation	KDM1A
chr1	23744252	23744451	200	*	105	ENSG00000204219	23707554	23751233	-	inside	6981	6782	NearestLocation	TCEA3
chr1	23866370	23866685	316	*	106	ENSG00000007968	23832922	23857712	-	upstream	-8658	8658	NearestLocation	E2F2
chr1	23903994	23904249	256	*	107	ENSG00000197880	23907985	23967058	+	upstream	-3991	3736	NearestLocation	MDS2
chr1	23972603	23972834	232	*	108	ENSG00000229239	23996784	24006749	+	upstream	-24181	23950	NearestLocation	NA
chr1	23999725	23999974	250	*	109	ENSG00000229239	23996784	24006749	+	inside	2941	2941	NearestLocation	NA
chr1	24104400	24104770	371	*	110	ENSG00000236810	24086872	24104777	-	inside	377	7	NearestLocation	ELOA-AS1
chr1	24477862	24478091	230	*	111	ENSG00000142677	24446261	24469611	-	upstream	-8251	8251	NearestLocation	IL22RA1
chr1	24525851	24526169	319	*	112	ENSG00000230023	24526730	24538183	+	upstream	-879	561	NearestLocation	LINC02800
chr1	25020868	25021263	396	*	113	ENSG00000238986	24993474	24993578	-	upstream	-27290	27290	NearestLocation	NA
chr1	25174604	25174859	256	*	114	ENSG00000238482	25104364	25104470	-	upstream	-70134	70134	NearestLocation	RNU6-1208P
chr1	25559554	25559850	297	*	115	ENSG00000117614	25549170	25558993	-	upstream	-561	561	NearestLocation	SYF2
chr1	25576623	25576949	327	*	116	ENSG00000272432	25574328	25574812	+	downstream	2295	1811	NearestLocation	NA
chr1	25628922	25629177	256	*	117	ENSG00000224183	25620655	25621134	-	upstream	-7788	7788	NearestLocation	NA
chr1	25649353	25649733	381	*	118	ENSG00000259984	25662920	25663956	-	downstream	14603	13187	NearestLocation	NA
chr1	25694735	25695044	310	*	119	ENSG00000238889	25672765	25672868	-	upstream	-21867	21867	NearestLocation	NA
chr1	25801032	25801241	210	*	120	ENSG00000204178	25757388	25826700	+	inside	43644	25459	NearestLocation	MACO1
chr1	25914438	25914941	504	*	121	ENSG00000225643	25907969	25916847	+	inside	6469	1906	NearestLocation	NA
chr1	25962640	25963028	389	*	122	ENSG00000117643	25943959	26112698	+	inside	18681	18681	NearestLocation	MAN1C1
chr1	26021607	26022006	400	*	123	ENSG00000233478	25971035	25985602	-	upstream	-36005	36005	NearestLocation	NA
chr1	26054343	26054910	568	*	124	ENSG00000233478	25971035	25985602	-	upstream	-68741	68741	NearestLocation	NA
chr1	26106835	26107059	225	*	125	ENSG00000162430	26126667	26144713	+	upstream	-19832	19608	NearestLocation	SELENON
chr1	26144549	26144760	212	*	126	ENSG00000117640	26145131	26159432	+	upstream	-582	371	NearestLocation	MTFR1L
chr1	26324622	26324912	291	*	127	ENSG00000158006	26286258	26324648	-	overlapStart	26	26	NearestLocation	PAFAH2
chr1	26393074	26393636	563	*	128	ENSG00000158022	26377795	26394927	-	inside	1853	1291	NearestLocation	TRIM63
chr1	26420810	26421049	240	*	129	ENSG00000175087	26437664	26452034	+	upstream	-16854	16615	NearestLocation	PDIK1L
chr1	26947136	26947437	302	*	130	ENSG00000229247	26966868	26967105	-	downstream	19969	19431	NearestLocation	NA
chr1	27018790	27019001	212	*	131	ENSG00000260063	27018623	27020622	-	inside	1832	167	NearestLocation	LOC101928728
chr1	27019449	27019805	357	*	132	ENSG00000260063	27018623	27020622	-	inside	1173	817	NearestLocation	LOC101928728
chr1	27024848	27025047	200	*	133	ENSG00000117713	27022524	27108595	+	inside	2324	2324	NearestLocation	ARID1A
chr1	27049881	27050199	319	*	134	ENSG00000117713	27022524	27108595	+	inside	27357	27357	NearestLocation	ARID1A
chr1	27216569	27216824	256	*	135	ENSG00000142751	27202624	27216788	-	overlapStart	219	36	NearestLocation	GPN2
chr1	27240578	27240985	408	*	136	ENSG00000131910	27237980	27240457	-	upstream	-121	121	NearestLocation	NR0B2
chr1	28143913	28144174	262	*	137	ENSG00000270031	28146494	28146852	+	upstream	-2581	2320	NearestLocation	NA
chr1	28851563	28851780	218	*	138	ENSG00000231468	28852830	28853739	-	downstream	2176	1050	NearestLocation	NA
chr1	28864400	28864619	220	*	139	ENSG00000231468	28852830	28853739	-	upstream	-10661	10661	NearestLocation	NA
chr1	28974930	28975460	531	*	140	ENSG00000270103	28975112	28975245	+	includeFeature	-182	182	NearestLocation	NA
chr1	29210482	29210683	202	*	141	ENSG00000199756	29208238	29208347	-	upstream	-2135	2135	NearestLocation	NA
chr1	29211510	29211721	212	*	142	ENSG00000159023	29213603	29446553	+	upstream	-2093	1882	NearestLocation	EPB41
chr1	29370300	29370597	298	*	143	ENSG00000206704	29312222	29312322	+	downstream	58078	57978	NearestLocation	NA
chr1	29483150	29483834	685	*	144	ENSG00000227637	29479001	29479503	+	downstream	4149	3647	NearestLocation	NA
chr1	29529398	29529597	200	*	145	ENSG00000237934	29550445	29551328	+	upstream	-21047	20848	NearestLocation	NA
chr1	29686174	29686510	337	*	146	ENSG00000230523	29656132	29676626	-	upstream	-9548	9548	NearestLocation	LINC01756
chr1	30435131	30435400	270	*	147	ENSG00000270927	30377712	30378204	-	upstream	-56927	56927	NearestLocation	NA
chr1	30601826	30602189	364	*	148	ENSG00000233372	30613110	30614454	+	upstream	-11284	10921	NearestLocation	NA
chr1	30970072	30970372	301	*	149	ENSG00000231949	30888672	30893955	+	downstream	81400	76117	NearestLocation	NA
chr1	31180806	31181203	398	*	150	ENSG00000186056	31191351	31199674	+	upstream	-10545	10148	NearestLocation	MATN1-AS1
chr1	31282404	31282720	317	*	151	ENSG00000229607	31283225	31288400	-	downstream	5996	505	NearestLocation	NA
chr1	31538255	31538468	214	*	152	ENSG00000134644	31404353	31538838	-	inside	583	370	NearestLocation	PUM1
chr1	31632744	31632955	212	*	153	ENSG00000225142	31581035	31581470	-	upstream	-51274	51274	NearestLocation	NA
chr1	31747834	31748092	259	*	154	ENSG00000229447	31736092	31736528	-	upstream	-11306	11306	NearestLocation	NA
chr1	32014671	32014976	306	*	155	ENSG00000229167	32037186	32041174	-	downstream	26503	22210	NearestLocation	NA
chr1	32178439	32178645	207	*	156	ENSG00000084636	32117848	32169920	-	upstream	-8519	8519	NearestLocation	COL16A1
chr1	32409858	32410243	386	*	157	ENSG00000184007	32372022	32410457	-	inside	599	214	NearestLocation	PTP4A2
chr1	32866550	32866815	266	*	158	ENSG00000224333	32867710	32868716	-	downstream	2166	895	NearestLocation	NA
chr1	32959861	32960107	247	*	159	ENSG00000273274	32930670	32962287	+	inside	29191	2180	NearestLocation	ZBTB8B
chr1	33109737	33110000	264	*	160	ENSG00000200591	33105552	33105653	+	downstream	4185	4084	NearestLocation	NA
chr1	33115853	33116248	396	*	161	ENSG00000176261	33065773	33116504	-	inside	651	256	NearestLocation	ZBTB8OS
chr1	33224299	33224779	481	*	162	ENSG00000162522	33207486	33240571	+	inside	16813	15792	NearestLocation	KIAA1522
chr1	33272565	33272837	273	*	163	ENSG00000116497	33282368	33324476	+	upstream	-9803	9531	NearestLocation	S100PBP
chr1	33413364	33413588	225	*	164	ENSG00000116514	33402046	33430286	-	inside	16922	11318	NearestLocation	RNF19B
chr1	33475238	33475544	307	*	165	ENSG00000236065	33452676	33498070	+	inside	22562	22526	NearestLocation	NA
chr1	33502503	33502704	202	*	166	LRG_133	33473586	33502492	-	upstream	-11	11	NearestLocation	NA
chr1	33520833	33521189	357	*	167	LRG_133	33473586	33502492	-	upstream	-18341	18341	NearestLocation	NA
chr1	33593049	33593257	209	*	168	ENSG00000142920	33546705	33586131	+	downstream	46344	6918	NearestLocation	AZIN2
chr1	33827257	33827464	208	*	169	ENSG00000233246	33815953	33828846	+	inside	11304	1382	NearestLocation	PHC2-AS1
chr1	34368112	34368442	331	*	170	ENSG00000231163	34334554	34351059	+	downstream	33558	17053	NearestLocation	CSMD2-AS1
chr1	35309228	35309468	241	*	171	ENSG00000230163	35316295	35317156	+	upstream	-7067	6827	NearestLocation	NA
chr1	35318335	35318669	335	*	172	ENSG00000230163	35316295	35317156	+	downstream	2040	1179	NearestLocation	NA
chr1	36084908	36085193	286	*	173	ENSG00000126067	36067185	36107445	-	inside	22537	17723	NearestLocation	PSMB2
chr1	36383258	36383594	337	*	174	ENSG00000271914	36395321	36395716	-	downstream	12458	11727	NearestLocation	NA
chr1	36705976	36706184	209	*	175	ENSG00000231849	36707499	36707757	-	downstream	1781	1315	NearestLocation	UBE2V2P4
chr1	36851583	36851857	275	*	176	ENSG00000196182	36805225	36851497	-	upstream	-86	86	NearestLocation	STK40
chr1	36954971	36955356	386	*	177	LRG_144	36931644	36948915	-	upstream	-6056	6056	NearestLocation	NA
chr1	37276568	37276807	240	*	178	ENSG00000234481	37238741	37241369	+	downstream	37827	35199	NearestLocation	NA
chr1	37282006	37282214	209	*	179	ENSG00000234481	37238741	37241369	+	downstream	43265	40637	NearestLocation	NA
chr1	37389938	37390138	201	*	180	ENSG00000163873	37261128	37499730	-	inside	109792	109592	NearestLocation	GRIK3
chr1	38380838	38381110	273	*	181	ENSG00000222282	38350695	38350789	+	downstream	30143	30049	NearestLocation	RNU6-584P
chr1	39234291	39234607	317	*	182	ENSG00000215895	39174603	39176562	+	downstream	59688	57729	NearestLocation	HSPA5P1
chr1	39679276	39680082	807	*	183	ENSG00000270040	39672184	39672629	+	downstream	7092	6647	NearestLocation	NA
chr1	39741952	39742292	341	*	184	ENSG00000226438	39715510	39723321	-	upstream	-18631	18631	NearestLocation	NA
chr1	40034916	40035115	200	*	185	ENSG00000201457	40033046	40033180	-	upstream	-1736	1736	NearestLocation	SNORA55
chr1	40036881	40037112	232	*	186	ENSG00000201457	40033046	40033180	-	upstream	-3701	3701	NearestLocation	SNORA55
chr1	40358416	40358784	369	*	187	ENSG00000236546	40363417	40364770	+	upstream	-5001	4633	NearestLocation	MYCL-AS1
chr1	40436746	40437161	416	*	188	ENSG00000228477	40428352	40429076	+	downstream	8394	7670	NearestLocation	NA
chr1	40442552	40442790	239	*	189	ENSG00000228477	40428352	40429076	+	downstream	14200	13476	NearestLocation	NA
chr1	40723462	40723798	337	*	190	ENSG00000084073	40723779	40759856	+	overlapStart	-317	19	NearestLocation	ZMPSTE24
chr1	40848893	40849181	289	*	191	ENSG00000213172	40830438	40830855	+	downstream	18455	18038	NearestLocation	NA
chr1	40997122	40997339	218	*	192	ENSG00000117010	40997233	41013841	+	overlapStart	-111	106	NearestLocation	ZNF684
chr1	41051137	41051510	374	*	193	ENSG00000233910	41059305	41060025	-	downstream	8888	7795	NearestLocation	GTF2F2P2
chr1	41261234	41261433	200	*	194	ENSG00000264582	41270518	41270811	+	upstream	-9284	9085	NearestLocation	RN7SL326P
chr1	41329117	41329534	418	*	195	ENSG00000229528	41329586	41342342	+	upstream	-469	52	NearestLocation	NA
chr1	41329722	41329954	233	*	196	ENSG00000229528	41329586	41342342	+	inside	136	136	NearestLocation	NA
chr1	41616677	41617071	395	*	197	ENSG00000215893	41564310	41564808	+	downstream	52367	51869	NearestLocation	NA
chr1	41969959	41970201	243	*	198	ENSG00000127129	41944446	41950344	-	upstream	-19615	19615	NearestLocation	EDN2
chr1	42720001	42720237	237	*	199	ENSG00000198815	42642210	42801548	-	inside	81547	77791	NearestLocation	FOXJ3
chr1	43389774	43389997	224	*	200	ENSG00000225099	43368903	43369583	+	downstream	20871	20191	NearestLocation	NA
chr1	43518953	43519234	282	*	201	ENSG00000252803	43489220	43489308	-	upstream	-29645	29645	NearestLocation	NA
chr1	43672479	43672872	394	*	202	ENSG00000199240	43662088	43662207	+	downstream	10391	10272	NearestLocation	RNA5SP46
chr1	44253287	44253576	290	*	203	ENSG00000233674	44209142	44209412	+	downstream	44145	43875	NearestLocation	NA
chr1	44527680	44527958	279	*	204	ENSG00000230615	44501798	44570647	+	inside	25882	25882	NearestLocation	NA
chr1	44706879	44707224	346	*	205	ENSG00000233602	44709080	44709945	-	downstream	3066	1856	NearestLocation	ERI3-IT1
chr1	44715890	44716193	304	*	206	ENSG00000233602	44709080	44709945	-	upstream	-5945	5945	NearestLocation	ERI3-IT1
chr1	44756339	44756795	457	*	207	ENSG00000252146	44798777	44798850	-	downstream	42511	41982	NearestLocation	NA
chr1	44947507	44947727	221	*	208	ENSG00000263381	45011165	45011224	+	upstream	-63658	63438	NearestLocation	MIR5584
chr1	44990277	44990590	314	*	209	ENSG00000263381	45011165	45011224	+	upstream	-20888	20575	NearestLocation	MIR5584
chr1	45196603	45197057	455	*	210	ENSG00000200169	45196727	45196842	-	includeFeature	239	124	NearestLocation	RNU5D-1
chr1	45284978	45285302	325	*	211	ENSG00000202444	45285555	45285669	-	downstream	691	253	NearestLocation	RNU5E-6P
chr1	45285691	45285890	200	*	212	ENSG00000202444	45285555	45285669	-	upstream	-22	22	NearestLocation	RNU5E-6P
chr1	45301649	45301848	200	*	213	ENSG00000117425	45285516	45308735	-	inside	7086	6887	NearestLocation	PTCH2
chr1	45994045	45994244	200	*	214	ENSG00000234379	45996599	45997811	+	upstream	-2554	2355	NearestLocation	NA
chr1	46050535	46050793	259	*	215	ENSG00000132780	46049518	46084566	+	inside	1017	1017	NearestLocation	NASP
chr1	46347323	46347569	247	*	216	ENSG00000232467	46312666	46313266	-	upstream	-34057	34057	NearestLocation	NA
chr1	46861819	46862138	320	*	217	ENSG00000117480	46859937	46879520	+	inside	1882	1882	NearestLocation	FAAH
chr1	46908423	46908670	248	*	218	ENSG00000224863	46912345	46915376	-	downstream	6953	3675	NearestLocation	LINC01398
chr1	48017668	48017924	257	*	219	ENSG00000227883	48015868	48016425	+	downstream	1800	1243	NearestLocation	ATP6V0E1P4
chr1	48053807	48054006	200	*	220	ENSG00000221447	48086765	48086849	-	downstream	33042	32759	NearestLocation	NA
chr1	48152428	48152637	210	*	221	ENSG00000227947	48154135	48169055	+	upstream	-1707	1498	NearestLocation	LINC01738
chr1	48342016	48342215	200	*	222	ENSG00000225028	48283738	48285909	+	downstream	58278	56107	NearestLocation	NA
chr1	48514606	48514878	273	*	223	ENSG00000226133	48519217	48532873	+	upstream	-4611	4339	NearestLocation	NA
chr1	48515923	48516226	304	*	224	ENSG00000226133	48519217	48532873	+	upstream	-3294	2991	NearestLocation	NA
chr1	48702442	48702651	210	*	225	ENSG00000272491	48693560	48695233	-	upstream	-7209	7209	NearestLocation	NA
chr1	48963799	48964053	255	*	226	ENSG00000232514	48962935	48963408	-	upstream	-391	391	NearestLocation	RPL21P25
chr1	48996470	48996699	230	*	227	ENSG00000232514	48962935	48963408	-	upstream	-33062	33062	NearestLocation	RPL21P25
chr1	49006278	49006563	286	*	228	ENSG00000232514	48962935	48963408	-	upstream	-42870	42870	NearestLocation	RPL21P25
chr1	49142641	49142944	304	*	229	ENSG00000162373	49193195	49242641	-	downstream	100000	50251	NearestLocation	BEND5
chr1	49174629	49174947	319	*	230	ENSG00000162373	49193195	49242641	-	downstream	68012	18248	NearestLocation	BEND5
chr1	49382280	49382488	209	*	231	ENSG00000229846	49513988	49653257	+	upstream	-131708	131500	NearestLocation	NA
chr1	49749545	49749744	200	*	232	ENSG00000230114	49723083	49734957	+	downstream	26462	14588	NearestLocation	AGBL4-AS1
chr1	50664275	50664474	200	*	233	ENSG00000237337	50639978	50641540	-	upstream	-22735	22735	NearestLocation	NA
chr1	51120686	51121067	382	*	234	ENSG00000207194	51048076	51048183	+	downstream	72610	72503	NearestLocation	RNU6-1026P
chr1	51658004	51658479	476	*	235	ENSG00000221492	51656555	51656630	+	downstream	1449	1374	NearestLocation	NA
chr1	51792163	51792369	207	*	236	ENSG00000261664	51795326	51800996	+	upstream	-3163	2957	NearestLocation	TTC39A-AS1
chr1	51889055	51889460	406	*	237	ENSG00000238140	51927393	51929088	+	upstream	-38338	37933	NearestLocation	NA
chr1	51895702	51896026	325	*	238	ENSG00000238140	51927393	51929088	+	upstream	-31691	31367	NearestLocation	NA
chr1	51953384	51953612	229	*	239	ENSG00000238140	51927393	51929088	+	downstream	25991	24296	NearestLocation	NA
chr1	51983640	51983846	207	*	240	ENSG00000227070	51983981	52027301	+	upstream	-341	135	NearestLocation	NA
chr1	52113877	52114218	342	*	241	ENSG00000227742	52027538	52060569	-	upstream	-53308	53308	NearestLocation	NA
chr1	52155414	52155641	228	*	242	ENSG00000236973	52172810	52173809	-	downstream	18395	17169	NearestLocation	GAPDHP51
chr1	52250769	52251067	299	*	243	ENSG00000266993	52259637	52264824	+	upstream	-8868	8570	NearestLocation	LOC105378721
chr1	53168934	53169134	201	*	244	ENSG00000162377	53152508	53164038	-	upstream	-4896	4896	NearestLocation	COA7
chr1	53476941	53477234	294	*	245	ENSG00000226147	53460398	53461698	+	downstream	16543	15243	NearestLocation	NA
chr1	53581689	53581932	244	*	246	ENSG00000235563	53580248	53584281	+	inside	1441	1441	NearestLocation	NA
chr1	53720134	53720345	212	*	247	ENSG00000270172	53708036	53710212	-	upstream	-9922	9922	NearestLocation	NA
chr1	53845934	53846190	257	*	248	ENSG00000230138	53832340	53833917	-	upstream	-12017	12017	NearestLocation	NA
chr1	53985157	53985395	239	*	249	ENSG00000143006	53925072	53933161	+	downstream	60085	51996	NearestLocation	DMRTB1
chr1	54191048	54191257	210	*	250	ENSG00000174332	53971910	54199877	-	inside	8829	8620	NearestLocation	GLIS1
chr1	54304218	54304465	248	*	251	ENSG00000058804	54231133	54304533	-	inside	315	68	NearestLocation	NDC1
chr1	54422980	54423262	283	*	252	ENSG00000116212	54411750	54433841	+	inside	11230	10579	NearestLocation	LRRC42
chr1	54712063	54712342	280	*	253	ENSG00000198711	54703710	54704736	+	downstream	8353	7327	NearestLocation	SSBP3-AS1
chr1	54730344	54730564	221	*	254	ENSG00000225632	54751078	54753044	+	upstream	-20734	20514	NearestLocation	NA
chr1	54771798	54772126	329	*	255	ENSG00000225632	54751078	54753044	+	downstream	20720	18754	NearestLocation	NA
chr1	54821688	54821931	244	*	256	ENSG00000157216	54691105	54879152	-	inside	57464	57221	NearestLocation	SSBP3
chr1	54851362	54851564	203	*	257	ENSG00000157216	54691105	54879152	-	inside	27790	27588	NearestLocation	SSBP3
chr1	55352626	55352834	209	*	258	ENSG00000116133	55315306	55352891	-	inside	265	57	NearestLocation	DHCR24
chr1	55662877	55663163	287	*	259	ENSG00000162402	55532032	55680786	-	inside	17909	17623	NearestLocation	USP24
chr1	56021591	56022075	485	*	260	ENSG00000234810	56046710	56200675	+	upstream	-25119	24635	NearestLocation	NA
chr1	56139144	56139365	222	*	261	ENSG00000234810	56046710	56200675	+	inside	92434	61310	NearestLocation	NA
chr1	56420822	56421022	201	*	262	ENSG00000233079	56410760	56415792	+	downstream	10062	5030	NearestLocation	LINC01755
chr1	56558966	56559242	277	*	263	ENSG00000235612	56611393	56620896	+	upstream	-52427	52151	NearestLocation	NA
chr1	56701846	56702136	291	*	264	ENSG00000260971	56713966	56724243	-	downstream	22397	11830	NearestLocation	NA
chr1	56908259	56908493	235	*	265	ENSG00000223956	56880635	56881638	+	downstream	27624	26621	NearestLocation	LINC01767
chr1	56919210	56919710	501	*	266	ENSG00000223956	56880635	56881638	+	downstream	38575	37572	NearestLocation	LINC01767
chr1	56959988	56960268	281	*	267	ENSG00000236776	57004124	57004583	+	upstream	-44136	43856	NearestLocation	RPL21P23
chr1	57175022	57175308	287	*	268	ENSG00000162409	57110995	57181008	+	inside	64027	5700	NearestLocation	PRKAA2
chr1	57276967	57277280	314	*	269	ENSG00000187889	57184477	57285369	-	inside	8402	8089	NearestLocation	FYB2
chr1	57287160	57287391	232	*	270	ENSG00000187889	57184477	57285369	-	upstream	-1791	1791	NearestLocation	FYB2
chr1	57492532	57492878	347	*	271	ENSG00000221591	57431953	57432035	+	downstream	60579	60497	NearestLocation	NA
chr1	57532654	57533295	642	*	272	ENSG00000221591	57431953	57432035	+	downstream	100701	100619	NearestLocation	NA
chr1	57747086	57747346	261	*	273	ENSG00000227935	57852248	57853122	+	upstream	-105162	104902	NearestLocation	NA
chr1	57828216	57828494	279	*	274	ENSG00000227935	57852248	57853122	+	upstream	-24032	23754	NearestLocation	NA
chr1	58188057	58188391	335	*	275	ENSG00000238773	58222756	58222848	+	upstream	-34699	34365	NearestLocation	NA
chr1	58312448	58312647	200	*	276	ENSG00000226759	58326204	58346577	+	upstream	-13756	13557	NearestLocation	DAB1-AS1
chr1	58432795	58432998	204	*	277	ENSG00000229887	58513847	58514963	-	downstream	82168	80849	NearestLocation	HNRNPA1P6
chr1	58628772	58628971	200	*	278	ENSG00000233216	58694354	58694675	-	downstream	65903	65383	NearestLocation	NA
chr1	58716092	58716296	205	*	279	ENSG00000233216	58694354	58694675	-	upstream	-21417	21417	NearestLocation	NA
chr1	58913670	58914085	416	*	280	ENSG00000173406	57460451	59012406	-	inside	98736	98321	NearestLocation	DAB1
chr1	58974145	58974692	548	*	281	ENSG00000173406	57460451	59012406	-	inside	38261	37714	NearestLocation	DAB1
chr1	59050361	59050734	374	*	282	ENSG00000184292	59041099	59043166	-	upstream	-7195	7195	NearestLocation	TACSTD2
chr1	59094679	59094911	233	*	283	ENSG00000185839	59096513	59097202	-	downstream	2523	1602	NearestLocation	NA
chr1	59349586	59349878	293	*	284	ENSG00000232453	59348540	59362375	-	inside	12789	1046	NearestLocation	LINC02777
chr1	59364714	59365031	318	*	285	ENSG00000232453	59348540	59362375	-	upstream	-2339	2339	NearestLocation	LINC02777
chr1	59543710	59544022	313	*	286	ENSG00000235215	59521671	59543788	-	overlapStart	78	78	NearestLocation	NA
chr1	59562207	59562459	253	*	287	ENSG00000235215	59521671	59543788	-	upstream	-18419	18419	NearestLocation	NA
chr1	59753780	59754018	239	*	288	ENSG00000270457	59754975	59755312	-	downstream	1532	957	NearestLocation	NA
chr1	60135718	60135969	252	*	289	ENSG00000266150	60198899	60198968	-	downstream	63250	62930	NearestLocation	MIR4711
chr1	60209503	60209711	209	*	290	ENSG00000266150	60198899	60198968	-	upstream	-10535	10535	NearestLocation	MIR4711
chr1	60235102	60235322	221	*	291	ENSG00000231816	60238467	60254520	+	upstream	-3365	3145	NearestLocation	NA
chr1	60297162	60297504	343	*	292	ENSG00000134709	60280458	60342050	+	inside	16704	16704	NearestLocation	HOOK1
chr1	60433079	60433308	230	*	293	ENSG00000265535	60440431	60440726	-	downstream	7647	7123	NearestLocation	RN7SL475P
chr1	61352602	61352976	375	*	294	ENSG00000162599	61330931	61928465	+	inside	21671	21671	NearestLocation	NFIA
chr1	61557249	61557463	215	*	295	ENSG00000263380	61549127	61549202	-	upstream	-8047	8047	NearestLocation	NA
chr1	61800573	61800916	344	*	296	ENSG00000237853	61714617	61719182	-	upstream	-81391	81391	NearestLocation	NFIA-AS1
chr1	61962302	61962619	318	*	297	ENSG00000264551	62094703	62094793	+	upstream	-132401	132084	NearestLocation	NA
chr1	62190964	62191257	294	*	298	ENSG00000162604	62146718	62191095	-	overlapStart	131	131	NearestLocation	TM2D1
chr1	62337991	62338245	255	*	299	ENSG00000212360	62318171	62318274	+	downstream	19820	19717	NearestLocation	RNU6-1177P
chr1	62744913	62745161	249	*	300	ENSG00000201153	62763821	62763928	-	downstream	19015	18660	NearestLocation	RNU6-371P
chr1	62753958	62754176	219	*	301	ENSG00000201153	62763821	62763928	-	downstream	9970	9645	NearestLocation	RNU6-371P
chr1	62873140	62873351	212	*	302	ENSG00000162607	62901968	62917475	+	upstream	-28828	28617	NearestLocation	USP1
chr1	63154120	63154373	254	*	303	ENSG00000235545	63154153	63176365	+	overlapStart	-33	33	NearestLocation	NA
chr1	63249482	63249776	295	*	304	ENSG00000125703	63249806	63331184	+	upstream	-324	30	NearestLocation	ATG4C
chr1	63621507	63621763	257	*	305	ENSG00000271593	63624754	63628307	-	downstream	6800	2991	NearestLocation	NA
chr1	63988963	63989166	204	*	306	ENSG00000203965	63989043	64038364	+	overlapStart	-80	80	NearestLocation	EFCAB7
chr1	64109715	64109999	285	*	307	ENSG00000244256	64121414	64121716	+	upstream	-11699	11415	NearestLocation	RN7SL130P
chr1	64261267	64261552	286	*	308	ENSG00000177452	64254392	64254975	-	upstream	-6292	6292	NearestLocation	RPL19P3
chr1	64319793	64320068	276	*	309	ENSG00000228056	64308862	64309356	-	upstream	-10437	10437	NearestLocation	NA
chr1	64386102	64386514	413	*	310	ENSG00000228056	64308862	64309356	-	upstream	-76746	76746	NearestLocation	NA
chr1	64503829	64504139	311	*	311	ENSG00000207190	64494566	64494672	-	upstream	-9157	9157	NearestLocation	RNU6-809P
chr1	64605672	64606050	379	*	312	ENSG00000223949	64560125	64636980	-	inside	31308	30930	NearestLocation	ROR1-AS1
chr1	64985711	64985910	200	*	313	ENSG00000158966	64936428	65158741	+	inside	49283	49283	NearestLocation	CACHD1
chr1	65063689	65064077	389	*	314	ENSG00000264470	65045530	65045606	+	downstream	18159	18083	NearestLocation	MIR4794
chr1	65081809	65082155	347	*	315	ENSG00000264470	65045530	65045606	+	downstream	36279	36203	NearestLocation	MIR4794
chr1	65733466	65733721	256	*	316	ENSG00000116675	65713902	65881552	+	inside	19564	19564	NearestLocation	DNAJC6
chr1	65743381	65743648	268	*	317	ENSG00000234144	65764438	65764663	-	downstream	21282	20790	NearestLocation	COX6CP13
chr1	65744784	65745010	227	*	318	ENSG00000234144	65764438	65764663	-	downstream	19879	19428	NearestLocation	COX6CP13
chr1	65775597	65775796	200	*	319	ENSG00000229294	65745139	65772204	-	upstream	-3393	3393	NearestLocation	NA
chr1	65886905	65887326	422	*	320	LRG_283	65886335	66103176	+	inside	570	570	NearestLocation	NA
chr1	66087354	66087765	412	*	321	ENSG00000224570	66041812	66044063	-	upstream	-43291	43291	NearestLocation	NA
chr1	66153544	66153883	340	*	322	ENSG00000239319	66226743	66227035	-	downstream	73491	72860	NearestLocation	RN7SL854P
chr1	66739319	66739720	402	*	323	ENSG00000223152	66560144	66560229	-	upstream	-179090	179090	NearestLocation	RNU4-88P
chr1	66916038	66916250	213	*	324	ENSG00000118473	66999066	67213982	+	upstream	-83028	82816	NearestLocation	SGIP1
chr1	67057635	67057942	308	*	325	ENSG00000264720	67094123	67094200	+	upstream	-36488	36181	NearestLocation	MIR3117
chr1	67223982	67224203	222	*	326	ENSG00000152760	67218142	67244470	+	inside	5840	5840	NearestLocation	TCTEX1D1
chr1	67230791	67230997	207	*	327	ENSG00000152760	67218142	67244470	+	inside	12649	12649	NearestLocation	TCTEX1D1
chr1	67313901	67314178	278	*	328	ENSG00000231080	67292625	67294241	+	downstream	21276	19660	NearestLocation	NA
chr1	67382082	67382289	208	*	329	ENSG00000152763	67278568	67390570	-	inside	8488	8281	NearestLocation	DNAI4
chr1	67485655	67485911	257	*	330	ENSG00000116704	67465015	67519782	-	inside	34127	20640	NearestLocation	SLC35D1
chr1	67624452	67625030	579	*	331	ENSG00000162594	67632083	67725662	+	upstream	-7631	7053	NearestLocation	IL23R
chr1	67632011	67632240	230	*	332	ENSG00000162594	67632083	67725662	+	overlapStart	-72	72	NearestLocation	IL23R
chr1	67821795	67822037	243	*	333	ENSG00000081985	67773047	67862583	+	inside	48748	40546	NearestLocation	IL12RB2
chr1	67979413	67979697	285	*	334	ENSG00000235200	67995313	67998012	+	upstream	-15900	15616	NearestLocation	NA
chr1	68111923	68112150	228	*	335	ENSG00000242482	68122516	68122812	-	downstream	10889	10366	NearestLocation	RN7SL392P
chr1	68152428	68152721	294	*	336	ENSG00000116717	68150744	68154021	+	inside	1684	1300	NearestLocation	GADD45A
chr1	68166505	68166749	245	*	337	ENSG00000116717	68150744	68154021	+	downstream	15761	12484	NearestLocation	GADD45A
chr1	68204145	68204352	208	*	338	ENSG00000238778	68238276	68238336	-	downstream	34191	33924	NearestLocation	RNU7-80P
chr1	68209010	68209239	230	*	339	ENSG00000238778	68238276	68238336	-	downstream	29326	29037	NearestLocation	RNU7-80P
chr1	68417708	68417992	285	*	340	ENSG00000235055	68509013	68509916	+	upstream	-91305	91021	NearestLocation	LOC100133029
chr1	68422711	68423021	311	*	341	ENSG00000235055	68509013	68509916	+	upstream	-86302	85992	NearestLocation	LOC100133029
chr1	68757712	68757952	241	*	342	ENSG00000225242	68748071	68748305	+	downstream	9641	9407	NearestLocation	COX6B1P7
chr1	69243008	69243229	222	*	343	ENSG00000225167	68980058	68980352	-	upstream	-262656	262656	NearestLocation	NA
chr1	69945447	69945763	317	*	344	ENSG00000229639	69898938	69901092	+	downstream	46509	44355	NearestLocation	LINC01758
chr1	69963678	69963895	218	*	345	ENSG00000229639	69898938	69901092	+	downstream	64740	62586	NearestLocation	LINC01758
chr1	70592489	70592891	403	*	346	ENSG00000244389	70645829	70646123	-	downstream	53634	52938	NearestLocation	RN7SL242P
chr1	70598759	70598989	231	*	347	ENSG00000244389	70645829	70646123	-	downstream	47364	46840	NearestLocation	RN7SL242P
chr1	70606633	70606906	274	*	348	ENSG00000244389	70645829	70646123	-	downstream	39490	38923	NearestLocation	RN7SL242P
chr1	70693249	70693470	222	*	349	ENSG00000228988	70684272	70686706	-	upstream	-6543	6543	NearestLocation	NA
chr1	70926392	70926794	403	*	350	ENSG00000271992	70910754	70911219	+	downstream	15638	15173	NearestLocation	NA
chr1	71141562	71141791	230	*	351	ENSG00000237033	71126340	71126948	-	upstream	-14614	14614	NearestLocation	CASP3P1
chr1	71485007	71485335	329	*	352	ENSG00000269933	71471537	71472185	-	upstream	-12822	12822	NearestLocation	NA
chr1	71992308	71992522	215	*	353	ENSG00000231985	72036639	72039241	+	upstream	-44331	44117	NearestLocation	NA
chr1	73088916	73089191	276	*	354	ENSG00000212366	73183346	73183452	-	downstream	94536	94155	NearestLocation	RNU6-1246P
chr1	73766254	73766806	553	*	355	ENSG00000233973	73771853	73820934	+	upstream	-5599	5047	NearestLocation	LINC01360
chr1	74470215	74470527	313	*	356	ENSG00000252005	74349396	74349505	+	downstream	120819	120710	NearestLocation	RNU4ATAC8P
chr1	74789727	74789999	273	*	357	ENSG00000237324	74807263	74844486	-	downstream	54759	17264	NearestLocation	NA
chr1	74828914	74829156	243	*	358	ENSG00000237324	74807263	74844486	-	inside	15572	15330	NearestLocation	NA
chr1	74858559	74858881	323	*	359	ENSG00000237324	74807263	74844486	-	upstream	-14073	14073	NearestLocation	NA
chr1	74886228	74886569	342	*	360	ENSG00000237324	74807263	74844486	-	upstream	-41742	41742	NearestLocation	NA
chr1	74968098	74968427	330	*	361	ENSG00000162621	74935562	74978298	-	inside	10200	9871	NearestLocation	LRRC53
chr1	76664223	76664497	275	*	362	ENSG00000184005	76540404	77100286	+	inside	123819	123819	NearestLocation	ST6GALNAC3
chr1	76796693	76796945	253	*	363	ENSG00000223905	76819268	76819931	-	downstream	23238	22323	NearestLocation	LOC100418965
chr1	76923980	76924306	327	*	364	ENSG00000223905	76819268	76819931	-	upstream	-104049	104049	NearestLocation	LOC100418965
chr1	77404853	77405138	286	*	365	ENSG00000221720	77473429	77473500	+	upstream	-68576	68291	NearestLocation	NA
chr1	78296698	78296965	268	*	366	ENSG00000235613	78312795	78314487	+	upstream	-16097	15830	NearestLocation	NSRP1P1
chr1	78353964	78354296	333	*	367	LRG_442	78354200	78409580	+	overlapStart	-236	96	NearestLocation	NA
chr1	78366342	78366558	217	*	368	ENSG00000235927	78347033	78355224	-	upstream	-11118	11118	NearestLocation	NEXN-AS1
chr1	78547998	78548312	315	*	369	ENSG00000251958	78554672	78554767	-	downstream	6769	6360	NearestLocation	RNU6-1102P
chr1	78610877	78611084	208	*	370	ENSG00000233333	78636165	78636921	-	downstream	26044	25081	NearestLocation	NA
chr1	78665798	78666090	293	*	371	ENSG00000233333	78636165	78636921	-	upstream	-28877	28877	NearestLocation	NA
chr1	79028626	79029048	423	*	372	ENSG00000137959	79085607	79111830	+	upstream	-56981	56559	NearestLocation	IFI44L
chr1	79072096	79072322	227	*	373	ENSG00000137959	79085607	79111830	+	upstream	-13511	13285	NearestLocation	IFI44L
chr1	79124523	79124857	335	*	374	ENSG00000238015	79131957	79132380	+	upstream	-7434	7100	NearestLocation	RPL23P3
chr1	79963000	79963205	206	*	375	ENSG00000232676	79986765	79987888	+	upstream	-23765	23560	NearestLocation	ADH5P2
chr1	80070156	80070444	289	*	376	ENSG00000232676	79986765	79987888	+	downstream	83391	82268	NearestLocation	ADH5P2
chr1	80112734	80113010	277	*	377	ENSG00000232676	79986765	79987888	+	downstream	125969	124846	NearestLocation	ADH5P2
chr1	80118164	80118420	257	*	378	ENSG00000232676	79986765	79987888	+	downstream	131399	130276	NearestLocation	ADH5P2
chr1	80168106	80168668	563	*	379	ENSG00000232676	79986765	79987888	+	downstream	181341	180218	NearestLocation	ADH5P2
chr1	80243045	80243408	364	*	380	ENSG00000232676	79986765	79987888	+	downstream	256280	255157	NearestLocation	ADH5P2
chr1	80576632	80576833	202	*	381	ENSG00000260322	80580628	80582603	+	upstream	-3996	3795	NearestLocation	NA
chr1	81318808	81319105	298	*	382	ENSG00000227937	81546475	81546856	+	upstream	-227667	227370	NearestLocation	MTND2P30
chr1	81689982	81690252	271	*	383	ENSG00000235089	81674253	81674895	+	downstream	15729	15087	NearestLocation	RPL10AP4
chr1	81771692	81772019	328	*	384	ENSG00000117114	81771845	82458120	+	overlapStart	-153	153	NearestLocation	ADGRL2
chr1	81782918	81783199	282	*	385	ENSG00000117114	81771845	82458120	+	inside	11073	11073	NearestLocation	ADGRL2
chr1	81796303	81796587	285	*	386	ENSG00000117114	81771845	82458120	+	inside	24458	24458	NearestLocation	ADGRL2
chr1	81889875	81890185	311	*	387	ENSG00000224494	81892141	81893290	+	upstream	-2266	1956	NearestLocation	HNRNPA3P14
chr1	81983797	81984011	215	*	388	ENSG00000227960	81970784	81971981	+	downstream	13013	11816	NearestLocation	NA
chr1	82000994	82001254	261	*	389	ENSG00000234953	81979565	82023387	-	inside	22393	21429	NearestLocation	LOC101927434
chr1	82101529	82101770	242	*	390	ENSG00000236676	82051626	82091398	-	upstream	-10131	10131	NearestLocation	NA
chr1	82133111	82133327	217	*	391	ENSG00000236676	82051626	82091398	-	upstream	-41713	41713	NearestLocation	NA
chr1	82205404	82205622	219	*	392	ENSG00000215875	82187378	82188753	+	downstream	18026	16651	NearestLocation	NA
chr1	82266814	82267085	272	*	393	ENSG00000215875	82187378	82188753	+	downstream	79436	78061	NearestLocation	NA
chr1	82439997	82440444	448	*	394	ENSG00000215875	82187378	82188753	+	downstream	252619	251244	NearestLocation	NA
chr1	83507301	83507506	206	*	395	ENSG00000236268	83439565	83451891	-	upstream	-55410	55410	NearestLocation	LINC01361
chr1	83568380	83568698	319	*	396	ENSG00000236268	83439565	83451891	-	upstream	-116489	116489	NearestLocation	LINC01361
chr1	83585580	83586055	476	*	397	ENSG00000236268	83439565	83451891	-	upstream	-133689	133689	NearestLocation	LINC01361
chr1	83738254	83738536	283	*	398	ENSG00000231364	83911736	83920454	+	upstream	-173482	173200	NearestLocation	NA
chr1	83789502	83789727	226	*	399	ENSG00000231364	83911736	83920454	+	upstream	-122234	122009	NearestLocation	NA
chr1	83897789	83897988	200	*	400	ENSG00000231364	83911736	83920454	+	upstream	-13947	13748	NearestLocation	NA
chr1	84152046	84152252	207	*	401	ENSG00000237076	84255963	84267148	+	upstream	-103917	103711	NearestLocation	NA
chr1	84320130	84320363	234	*	402	ENSG00000233008	84041459	84326706	-	inside	6576	6343	NearestLocation	LOC101927560;LINC01725
chr1	84485991	84486190	200	*	403	ENSG00000229486	84481548	84484054	-	upstream	-1937	1937	NearestLocation	NA
chr1	85336415	85336628	214	*	404	ENSG00000171517	85277285	85358896	-	inside	22481	22268	NearestLocation	LPAR3
chr1	85674024	85674329	306	*	405	ENSG00000097096	85622556	85666729	-	upstream	-7295	7295	NearestLocation	SYDE2
chr1	85690837	85691277	441	*	406	ENSG00000097096	85622556	85666729	-	upstream	-24108	24108	NearestLocation	SYDE2
chr1	85691734	85691972	239	*	407	ENSG00000097096	85622556	85666729	-	upstream	-25005	25005	NearestLocation	SYDE2
chr1	85781412	85781684	273	*	408	ENSG00000264380	85750293	85750356	+	downstream	31119	31056	NearestLocation	NA
chr1	85937251	85937572	322	*	409	ENSG00000273264	85932978	85933343	+	downstream	4273	3908	NearestLocation	NA
chr1	86078494	86078823	330	*	410	ENSG00000230285	86064814	86066417	+	downstream	13680	12077	NearestLocation	NA
chr1	86173668	86173867	200	*	411	ENSG00000117174	86115106	86174116	-	inside	448	249	NearestLocation	ZNHIT6
chr1	86663051	86663321	271	*	412	ENSG00000171502	86194916	86622626	-	upstream	-40425	40425	NearestLocation	COL24A1
chr1	87240777	87241054	278	*	413	ENSG00000230721	87250596	87251150	+	upstream	-9819	9542	NearestLocation	RPL17P5
chr1	87282059	87282354	296	*	414	ENSG00000230721	87250596	87251150	+	downstream	31463	30909	NearestLocation	RPL17P5
chr1	87412753	87412952	200	*	415	ENSG00000224198	87409368	87410425	-	upstream	-2328	2328	NearestLocation	NA
chr1	87418873	87419267	395	*	416	ENSG00000224198	87409368	87410425	-	upstream	-8448	8448	NearestLocation	NA
chr1	87821499	87821972	474	*	417	ENSG00000227290	87819207	87837338	-	inside	15839	2292	NearestLocation	LINC01364
chr1	87835441	87835711	271	*	418	ENSG00000227290	87819207	87837338	-	inside	1897	1627	NearestLocation	LINC01364
chr1	88069406	88069605	200	*	419	ENSG00000199318	87918923	87919056	-	upstream	-150350	150350	NearestLocation	RNA5SP52
chr1	88150072	88150330	259	*	420	ENSG00000224235	88365592	88371397	-	downstream	221325	215262	NearestLocation	NA
chr1	88702617	88702832	216	*	421	ENSG00000270507	88778836	88778985	+	upstream	-76219	76004	NearestLocation	NA
chr1	88937955	88938358	404	*	422	ENSG00000239504	88943514	88943797	-	downstream	5842	5156	NearestLocation	RN7SL583P
chr1	89439287	89439530	244	*	423	ENSG00000137944	89401456	89458636	-	inside	19349	19106	NearestLocation	KYAT3
chr1	89510992	89511191	200	*	424	ENSG00000117228	89518002	89531043	-	downstream	20051	6811	NearestLocation	GBP1
chr1	89663722	89664060	339	*	425	ENSG00000162654	89646831	89664615	-	inside	893	555	NearestLocation	GBP4
chr1	89685622	89685832	211	*	426	ENSG00000162654	89646831	89664615	-	upstream	-21007	21007	NearestLocation	GBP4
chr1	89760872	89761167	296	*	427	ENSG00000238081	89755359	89756020	-	upstream	-4852	4852	NearestLocation	NA
chr1	89857250	89857513	264	*	428	ENSG00000215874	89859592	89860224	+	upstream	-2342	2079	NearestLocation	CAPNS1P1
chr1	89920745	89920977	233	*	429	ENSG00000225492	89873238	89891802	+	downstream	47507	28943	NearestLocation	GBP1P1
chr1	89969338	89969552	215	*	430	ENSG00000197147	89990395	90063423	+	upstream	-21057	20843	NearestLocation	LRRC8B
chr1	90097575	90097774	200	*	431	ENSG00000231999	90048800	90098453	-	inside	878	679	NearestLocation	LRRC8C-DT
chr1	90228530	90228775	246	*	432	ENSG00000239176	90233771	90233877	-	downstream	5347	4996	NearestLocation	NA
chr1	90289263	90289468	206	*	433	ENSG00000171492	90286573	90402170	+	inside	2690	2690	NearestLocation	LRRC8D
chr1	90344608	90344862	255	*	434	ENSG00000171492	90286573	90402170	+	inside	58035	57308	NearestLocation	LRRC8D
chr1	90366512	90366737	226	*	435	ENSG00000272672	90405160	90405706	+	upstream	-38648	38423	NearestLocation	NA
chr1	91368330	91368551	222	*	436	ENSG00000232882	91358549	91359169	-	upstream	-9161	9161	NearestLocation	NA
chr1	91563859	91564404	546	*	437	ENSG00000232393	91489476	91490361	+	downstream	74383	73498	NearestLocation	RPL5P6
chr1	91574913	91575139	227	*	438	ENSG00000232393	91489476	91490361	+	downstream	85437	84552	NearestLocation	RPL5P6
chr1	91630892	91631103	212	*	439	ENSG00000206817	91727182	91727281	+	upstream	-96290	96079	NearestLocation	NA
chr1	91681795	91681994	200	*	440	ENSG00000206817	91727182	91727281	+	upstream	-45387	45188	NearestLocation	NA
chr1	92040487	92040760	274	*	441	ENSG00000229067	92065728	92065878	+	upstream	-25241	24968	NearestLocation	NA
chr1	92060215	92060509	295	*	442	ENSG00000229067	92065728	92065878	+	upstream	-5513	5219	NearestLocation	NA
chr1	92067278	92067749	472	*	443	ENSG00000229067	92065728	92065878	+	downstream	1550	1400	NearestLocation	NA
chr1	92173194	92173419	226	*	444	ENSG00000203914	92100568	92109639	+	downstream	72626	63555	NearestLocation	HSP90B3P
chr1	93270404	93270684	281	*	445	ENSG00000067208	92974253	93257961	-	upstream	-12443	12443	NearestLocation	EVI5
chr1	93433913	93434345	433	*	446	ENSG00000252121	93435161	93435267	-	downstream	1354	816	NearestLocation	RNU6-970P
chr1	93544565	93544858	294	*	447	ENSG00000143033	93544792	93604638	+	overlapStart	-227	66	NearestLocation	MTF2
chr1	93742714	93743058	345	*	448	ENSG00000229567	93744518	93744686	-	downstream	1972	1460	NearestLocation	NA
chr1	93939847	93940186	340	*	449	ENSG00000212601	93953890	93954009	-	downstream	14162	13704	NearestLocation	RNA5SP53
chr1	93944978	93945264	287	*	450	ENSG00000212601	93953890	93954009	-	downstream	9031	8626	NearestLocation	RNA5SP53
chr1	94050877	94051181	305	*	451	ENSG00000224093	94057756	94071130	+	upstream	-6879	6575	NearestLocation	NA
chr1	94097290	94097507	218	*	452	ENSG00000224093	94057756	94071130	+	downstream	39534	26160	NearestLocation	NA
chr1	94217596	94217814	219	*	453	ENSG00000230439	94218480	94241000	-	downstream	23404	666	NearestLocation	NA
chr1	94511104	94511430	327	*	454	ENSG00000198691	94458393	94586688	-	inside	75584	52711	NearestLocation	ABCA4
chr1	94791924	94792173	250	*	455	ENSG00000236098	94784035	94790125	-	upstream	-1799	1799	NearestLocation	NA
chr1	95123579	95123778	200	*	456	ENSG00000232857	95116100	95116934	-	upstream	-6645	6645	NearestLocation	NA
chr1	95123949	95124177	229	*	457	ENSG00000232857	95116100	95116934	-	upstream	-7015	7015	NearestLocation	NA
chr1	95272228	95272618	391	*	458	ENSG00000224081	95104017	95285837	-	inside	13609	13219	NearestLocation	SLC44A3-AS1
chr1	95419772	95420098	327	*	459	ENSG00000235501	95393122	95428826	+	inside	26650	8728	NearestLocation	NA
chr1	95527068	95527407	340	*	460	ENSG00000230427	95527152	95533101	+	overlapStart	-84	84	NearestLocation	ALG14-AS1
chr1	95534610	95534821	212	*	461	ENSG00000172339	95439963	95538501	-	inside	3891	3680	NearestLocation	ALG14
chr1	95550164	95550469	306	*	462	ENSG00000172339	95439963	95538501	-	upstream	-11663	11663	NearestLocation	ALG14
chr1	95616670	95616869	200	*	463	ENSG00000206679	95591067	95591165	-	upstream	-25505	25505	NearestLocation	NA
chr1	95645162	95645532	371	*	464	ENSG00000206679	95591067	95591165	-	upstream	-53997	53997	NearestLocation	NA
chr1	95805725	95805944	220	*	465	ENSG00000230434	95816807	95817810	-	downstream	12085	10863	NearestLocation	NA
chr1	95872694	95872938	245	*	466	ENSG00000237954	95821785	95846556	-	upstream	-26138	26138	NearestLocation	NA
chr1	96455557	96455825	269	*	467	ENSG00000237435	96403457	96488436	+	inside	52100	32611	NearestLocation	LINC02790
chr1	96880178	96880503	326	*	468	ENSG00000234422	96884150	96884489	+	upstream	-3972	3647	NearestLocation	UBE2WP1
chr1	97303312	97303511	200	*	469	ENSG00000212039	97368255	97368348	+	upstream	-64943	64744	NearestLocation	NA
chr1	97762806	97763005	200	*	470	ENSG00000232542	97859710	97885697	-	downstream	122891	96705	NearestLocation	NA
chr1	97814169	97814445	277	*	471	ENSG00000232542	97859710	97885697	-	downstream	71528	45265	NearestLocation	NA
chr1	99023503	99023731	229	*	472	ENSG00000162627	99127236	99226056	+	upstream	-103733	103505	NearestLocation	SNX7
chr1	99645927	99646209	283	*	473	ENSG00000117600	99729509	99775146	+	upstream	-83582	83300	NearestLocation	PLPPR4
chr1	99745104	99745425	322	*	474	ENSG00000117600	99729509	99775146	+	inside	15595	15595	NearestLocation	PLPPR4
chr1	99862705	99862962	258	*	475	ENSG00000233983	99929934	99930332	+	upstream	-67229	66972	NearestLocation	NA
chr1	99905152	99905698	547	*	476	ENSG00000233983	99929934	99930332	+	upstream	-24782	24236	NearestLocation	NA
chr1	99946998	99947275	278	*	477	ENSG00000233983	99929934	99930332	+	downstream	17064	16666	NearestLocation	NA
chr1	99969954	99970153	200	*	478	ENSG00000224445	99937971	99999571	-	inside	29617	29418	NearestLocation	LINC01708
chr1	100247450	100247694	245	*	479	ENSG00000201491	100250296	100250441	-	downstream	2991	2602	NearestLocation	RNU4-75P
chr1	100249735	100249995	261	*	480	ENSG00000201491	100250296	100250441	-	downstream	706	301	NearestLocation	RNU4-75P
chr1	100274325	100274683	359	*	481	ENSG00000202254	100257218	100257309	+	downstream	17107	17016	NearestLocation	NA
chr1	100315967	100316263	297	*	482	ENSG00000162688	100315640	100389579	+	inside	327	327	NearestLocation	AGL
chr1	100424897	100425181	285	*	483	ENSG00000117620	100435345	100492535	+	upstream	-10448	10164	NearestLocation	SLC35A3
chr1	100598292	100598604	313	*	484	ENSG00000156876	100549119	100598511	-	overlapStart	219	93	NearestLocation	SASS6
chr1	100731347	100731546	200	*	485	ENSG00000224616	100729565	100731676	-	inside	329	130	NearestLocation	NA
chr1	101098288	101098511	224	*	486	ENSG00000230402	101092605	101106169	-	inside	7881	5683	NearestLocation	NA
chr1	101172456	101172724	269	*	487	ENSG00000162692	101185298	101204601	+	upstream	-12842	12574	NearestLocation	VCAM1
chr1	101223513	101223837	325	*	488	ENSG00000162692	101185298	101204601	+	downstream	38215	18912	NearestLocation	VCAM1
chr1	101552397	101552619	223	*	489	ENSG00000252765	101598709	101598895	+	upstream	-46312	46090	NearestLocation	NA
chr1	101631499	101631891	393	*	490	ENSG00000271578	101656076	101656550	+	upstream	-24577	24185	NearestLocation	NA
chr1	101683046	101683317	272	*	491	ENSG00000238296	101694220	101694321	-	downstream	11275	10903	NearestLocation	NA
chr1	101773016	101773270	255	*	492	ENSG00000231671	101788893	101855859	+	upstream	-15877	15623	NearestLocation	LINC01307
chr1	101910333	101910888	556	*	493	ENSG00000231671	101788893	101855859	+	downstream	121440	54474	NearestLocation	LINC01307
chr1	101939633	101939933	301	*	494	ENSG00000231671	101788893	101855859	+	downstream	150740	83774	NearestLocation	LINC01307
chr1	101947960	101948249	290	*	495	ENSG00000231671	101788893	101855859	+	downstream	159067	92101	NearestLocation	LINC01307
chr1	103223039	103223243	205	*	496	ENSG00000230864	103228878	103319398	-	downstream	96359	5635	NearestLocation	NA
chr1	103523980	103524231	252	*	497	ENSG00000234257	103565699	103566260	-	downstream	42280	41468	NearestLocation	SOD2P1
chr1	103731228	103731438	211	*	498	ENSG00000232753	103817769	103828355	+	upstream	-86541	86331	NearestLocation	NA
chr1	104068652	104068985	334	*	499	ENSG00000185946	104068313	104097861	+	inside	339	339	NearestLocation	RNPC3
chr1	104184383	104184595	213	*	500	ENSG00000237763	104197912	104207173	+	upstream	-13529	13317	NearestLocation	AMY1A
chr1	104268566	104268797	232	*	501	ENSG00000227408	104256345	104262493	+	downstream	12221	6073	NearestLocation	AMYP1
chr1	104677749	104678071	323	*	502	ENSG00000228347	104695928	104696452	-	downstream	18703	17857	NearestLocation	NA
chr1	104798511	104798713	203	*	503	ENSG00000228347	104695928	104696452	-	upstream	-102059	102059	NearestLocation	NA
chr1	105756947	105757165	219	*	504	ENSG00000225036	105976616	105977443	+	upstream	-219669	219451	NearestLocation	CDK4P1
chr1	106175383	106175825	443	*	505	ENSG00000230768	106130197	106161580	-	upstream	-13803	13803	NearestLocation	LINC01676
chr1	106384765	106385071	307	*	506	ENSG00000237897	106433315	106434052	-	downstream	49287	48244	NearestLocation	NA
chr1	106581101	106581336	236	*	507	ENSG00000233047	106470246	106565834	-	upstream	-15267	15267	NearestLocation	NA
chr1	106810780	106810979	200	*	508	ENSG00000230932	106623423	106624001	-	upstream	-186779	186779	NearestLocation	NA
chr1	107432334	107432604	271	*	509	ENSG00000237460	107360861	107380789	+	downstream	71473	51545	NearestLocation	NA
chr1	107492832	107493117	286	*	510	ENSG00000198890	107599267	107601916	+	upstream	-106435	106150	NearestLocation	PRMT6
chr1	107525157	107525372	216	*	511	ENSG00000198890	107599267	107601916	+	upstream	-74110	73895	NearestLocation	PRMT6
chr1	107787469	107787734	266	*	512	ENSG00000162631	107682629	108026080	+	inside	104840	104840	NearestLocation	NTNG1
chr1	107938786	107938990	205	*	513	ENSG00000238883	107991091	107991177	-	downstream	52391	52101	NearestLocation	NA
chr1	108009995	108010230	236	*	514	ENSG00000238883	107991091	107991177	-	upstream	-18818	18818	NearestLocation	NA
chr1	108293080	108293279	200	*	515	ENSG00000265536	108318796	108318878	-	downstream	25798	25517	NearestLocation	NA
chr1	108405907	108406228	322	*	516	ENSG00000265536	108318796	108318878	-	upstream	-87029	87029	NearestLocation	NA
chr1	108559125	108559487	363	*	517	ENSG00000264753	108561275	108561393	-	downstream	2268	1788	NearestLocation	NA
chr1	109036383	109036582	200	*	518	ENSG00000227832	109044980	109046077	+	upstream	-8597	8398	NearestLocation	NA
chr1	109145703	109145904	202	*	519	ENSG00000162636	109102711	109187522	+	inside	42992	41618	NearestLocation	FAM102B
chr1	109224360	109224610	251	*	520	ENSG00000134186	109234945	109244425	+	upstream	-10585	10335	NearestLocation	PRPF38B
chr1	109633119	109633400	282	*	521	ENSG00000273382	109630593	109633480	-	inside	361	80	NearestLocation	NA
chr1	109761264	109761471	208	*	522	ENSG00000031698	109756540	109780791	+	inside	4724	4724	NearestLocation	SARS1
chr1	109849921	109850501	581	*	523	ENSG00000221986	109834987	109849663	-	upstream	-258	258	NearestLocation	MYBPHL
chr1	110398681	110398932	252	*	524	ENSG00000228420	110370977	110414058	+	inside	27704	15126	NearestLocation	NA
chr1	110473777	110474014	238	*	525	ENSG00000184371	110452864	110473614	+	downstream	20913	163	NearestLocation	CSF1
chr1	110632246	110632539	294	*	526	ENSG00000258673	110625310	110652341	+	inside	6936	6936	NearestLocation	LINC01397
chr1	111704534	111704750	217	*	527	ENSG00000272982	111723996	111724113	-	downstream	19579	19246	NearestLocation	NA
chr1	111762142	111762384	243	*	528	ENSG00000162777	111729796	111747157	-	upstream	-14985	14985	NearestLocation	DENND2D
chr1	111907312	111907709	398	*	529	ENSG00000234020	111895897	111910031	-	inside	2719	2322	NearestLocation	NA
chr1	112094768	112095070	303	*	530	ENSG00000116473	112084840	112259313	+	inside	9928	9928	NearestLocation	RAP1A
chr1	112102492	112102782	291	*	531	ENSG00000121933	112025970	112106584	-	inside	4092	3802	NearestLocation	TMIGD3
chr1	112291653	112291869	217	*	532	ENSG00000064703	112297867	112310638	+	upstream	-6214	5998	NearestLocation	DDX20
chr1	112476318	112476592	275	*	533	ENSG00000237556	112451958	112453553	+	downstream	24360	22765	NearestLocation	KCND3-AS1
chr1	112519470	112519713	244	*	534	ENSG00000171385	112313284	112531777	-	inside	12307	12064	NearestLocation	KCND3
chr1	112519470	112519713	244	*	534	LRG_445	112318454	112531777	-	inside	12307	12064	NearestLocation	NA
chr1	112850614	112850843	230	*	535	ENSG00000231246	112719856	112903150	-	inside	52536	52307	NearestLocation	LINC02884
chr1	113346686	113346886	201	*	536	ENSG00000224167	113392650	113420493	+	upstream	-45964	45764	NearestLocation	NA
chr1	113361736	113361964	229	*	537	ENSG00000224167	113392650	113420493	+	upstream	-30914	30686	NearestLocation	NA
chr1	113582771	113583024	254	*	538	ENSG00000236066	113550876	113589677	+	inside	31895	6653	NearestLocation	NA
chr1	113614925	113615622	698	*	539	ENSG00000238198	113554309	113615727	-	inside	802	105	NearestLocation	LRIG2-DT
chr1	113760463	113760791	329	*	540	ENSG00000236887	113741447	113741880	+	downstream	19016	18583	NearestLocation	RPS15P1
chr1	113776886	113777165	280	*	541	ENSG00000236887	113741447	113741880	+	downstream	35439	35006	NearestLocation	RPS15P1
chr1	113887551	113887814	264	*	542	ENSG00000081026	113933371	114228545	+	upstream	-45820	45557	NearestLocation	MAGI3
chr1	114471994	114472232	239	*	543	ENSG00000235527	114466622	114472114	-	overlapStart	120	118	NearestLocation	HIPK1-AS1
chr1	114489405	114489661	257	*	544	ENSG00000235527	114466622	114472114	-	upstream	-17291	17291	NearestLocation	HIPK1-AS1
chr1	114600853	114601122	270	*	545	ENSG00000270780	114544055	114544857	-	upstream	-55996	55996	NearestLocation	NA
chr1	114638899	114639139	241	*	546	ENSG00000134207	114631913	114696541	-	inside	57642	6986	NearestLocation	SYT6
chr1	114652729	114652928	200	*	547	ENSG00000134207	114631913	114696541	-	inside	43812	20816	NearestLocation	SYT6
chr1	114929393	114929592	200	*	548	ENSG00000271419	114896608	114897800	+	downstream	32785	31593	NearestLocation	LOC100421116
chr1	115052834	115053202	369	*	549	ENSG00000197323	114935399	115053781	-	inside	947	579	NearestLocation	TRIM33
chr1	115124236	115124643	408	*	550	ENSG00000116752	115110178	115124260	-	overlapStart	24	24	NearestLocation	BCAS2
chr1	115579797	115580289	493	*	551	ENSG00000134200	115572415	115576941	+	downstream	7382	2856	NearestLocation	TSHB
chr1	116757110	116757323	214	*	552	ENSG00000235933	116706905	116708862	+	downstream	50205	48248	NearestLocation	NA
chr1	116861393	116861672	280	*	553	ENSG00000221040	116821228	116821442	+	downstream	40165	39951	NearestLocation	NA
chr1	116877889	116878184	296	*	554	ENSG00000163399	116915290	116952883	+	upstream	-37401	37106	NearestLocation	ATP1A1
chr1	116924943	116925240	298	*	555	ENSG00000269279	116915890	116926718	-	inside	1775	1478	NearestLocation	NA
chr1	116947822	116948046	225	*	556	ENSG00000212385	116956388	116956491	-	downstream	8669	8342	NearestLocation	RNU6-817P
chr1	116958414	116958867	454	*	557	ENSG00000212385	116956388	116956491	-	upstream	-1923	1923	NearestLocation	RNU6-817P
chr1	117006379	117006703	325	*	558	ENSG00000200547	116995158	116995249	+	downstream	11221	11130	NearestLocation	NA
chr1	117027774	117028032	259	*	559	ENSG00000233154	116966346	117021464	-	upstream	-6310	6310	NearestLocation	LINC01762
chr1	117046685	117047007	323	*	560	ENSG00000224950	117035645	117041834	-	upstream	-4851	4851	NearestLocation	NA
chr1	117174825	117175024	200	*	561	ENSG00000143061	117117031	117210375	-	inside	35550	35351	NearestLocation	IGSF3
chr1	117191031	117191244	214	*	562	ENSG00000143061	117117031	117210375	-	inside	19344	19131	NearestLocation	IGSF3
chr1	117208696	117208912	217	*	563	ENSG00000143061	117117031	117210375	-	inside	1679	1463	NearestLocation	IGSF3
chr1	117301048	117301247	200	*	564	ENSG00000116824	117297007	117311850	+	inside	4041	4041	NearestLocation	CD2
chr1	117744919	117745255	337	*	565	ENSG00000134258	117686209	117753556	-	inside	8637	8301	NearestLocation	VTCN1
chr1	117811459	117811885	427	*	566	ENSG00000235202	117838142	117863958	+	upstream	-26683	26257	NearestLocation	LINC01525
chr1	117827205	117827516	312	*	567	ENSG00000235202	117838142	117863958	+	upstream	-10937	10626	NearestLocation	LINC01525
chr1	117842936	117843135	200	*	568	ENSG00000235202	117838142	117863958	+	inside	4794	4794	NearestLocation	LINC01525
chr1	117844689	117844897	209	*	569	ENSG00000235202	117838142	117863958	+	inside	6547	6547	NearestLocation	LINC01525
chr1	117864477	117864690	214	*	570	ENSG00000235202	117838142	117863958	+	downstream	26335	519	NearestLocation	LINC01525
chr1	118155298	118155555	258	*	571	ENSG00000183508	118148556	118170994	+	inside	6742	6742	NearestLocation	TENT5C
chr1	118275067	118275365	299	*	572	ENSG00000270719	118242651	118242864	-	upstream	-32203	32203	NearestLocation	NA
chr1	118400220	118400419	200	*	573	ENSG00000196505	118406107	118472253	-	downstream	72033	5688	NearestLocation	GDAP2
chr1	118939864	118940063	200	*	574	ENSG00000222209	118806995	118807112	-	upstream	-132752	132752	NearestLocation	RNA5SP56
chr1	119046851	119047259	409	*	575	ENSG00000226126	119156956	119158269	-	downstream	111418	109697	NearestLocation	PSMC1P12
chr1	120026489	120026744	256	*	576	ENSG00000229570	120038459	120039464	-	downstream	12975	11715	NearestLocation	GAPDHP58
chr1	120060377	120060723	347	*	577	ENSG00000203857	120049821	120057681	+	downstream	10556	2696	NearestLocation	HSD3B1
chr1	120316186	120316385	200	*	578	LRG_447	120290619	120311555	-	upstream	-4631	4631	NearestLocation	NA
chr1	120537709	120537951	243	*	579	ENSG00000134250	120454176	120612240	-	inside	74531	74289	NearestLocation	NOTCH2
chr1	120568585	120568784	200	*	580	ENSG00000134250	120454176	120612240	-	inside	43655	43456	NearestLocation	NOTCH2
chr1	120654427	120654662	236	*	581	ENSG00000207149	120669562	120669662	+	upstream	-15135	14900	NearestLocation	RNU6-465P
chr1	120696451	120696839	389	*	582	ENSG00000273131	120693320	120697146	-	inside	695	307	NearestLocation	NA
chr1	120810655	120810878	224	*	583	ENSG00000188610	120837756	120855681	+	upstream	-27101	26878	NearestLocation	FAM72B
chr1	120863448	120863717	270	*	584	ENSG00000268993	120880883	120881270	+	upstream	-17435	17166	NearestLocation	RPL22P6
chr1	120923011	120923309	299	*	585	ENSG00000233029	120925634	120933000	+	upstream	-2623	2325	NearestLocation	LOC100996318
chr1	121094247	121094450	204	*	586	ENSG00000171943	121107124	121129949	+	upstream	-12877	12674	NearestLocation	SRGAP2C
chr1	121141564	121141849	286	*	587	ENSG00000230806	121102017	121140666	-	upstream	-898	898	NearestLocation	SRGAP2-AS1
chr1	142841389	142841753	365	*	588	ENSG00000234978	142803224	142816004	-	upstream	-25385	25385	NearestLocation	NA
chr1	142952293	142952543	251	*	589	ENSG00000231182	142950985	142956716	-	inside	4423	1308	NearestLocation	NA
chr1	142966731	142966930	200	*	590	ENSG00000231182	142950985	142956716	-	upstream	-10015	10015	NearestLocation	NA
chr1	143151313	143151530	218	*	591	ENSG00000237291	143154493	143169717	+	upstream	-3180	2963	NearestLocation	NA
chr1	143237304	143237580	277	*	592	ENSG00000225278	143211628	143240439	-	inside	3135	2859	NearestLocation	NA
chr1	143255246	143255469	224	*	593	ENSG00000234654	143245823	143246210	+	downstream	9423	9036	NearestLocation	NA
chr1	143273510	143273713	204	*	594	ENSG00000234654	143245823	143246210	+	downstream	27687	27300	NearestLocation	NA
chr1	143888342	143888626	285	*	595	ENSG00000263497	143876891	143876982	-	upstream	-11360	11360	NearestLocation	NA
chr1	143937802	143938026	225	*	596	ENSG00000196369	143913615	144094424	+	inside	24187	24187	NearestLocation	SRGAP2B
chr1	143941142	143941527	386	*	597	ENSG00000196369	143913615	144094424	+	inside	27527	27527	NearestLocation	SRGAP2B
chr1	143942346	143942546	201	*	598	ENSG00000196369	143913615	144094424	+	inside	28731	28731	NearestLocation	SRGAP2B
chr1	144036554	144036963	410	*	599	ENSG00000271644	144043972	144044082	-	downstream	7528	7009	NearestLocation	NA
chr1	144062075	144062457	383	*	600	ENSG00000271644	144043972	144044082	-	upstream	-17993	17993	NearestLocation	NA
chr1	144603510	144604002	493	*	601	ENSG00000203843	144612266	144612683	-	downstream	9173	8264	NearestLocation	NA
chr1	144621302	144621525	224	*	602	ENSG00000203843	144612266	144612683	-	upstream	-8619	8619	NearestLocation	NA
chr1	145004239	145004453	215	*	603	ENSG00000272755	145018395	145018959	+	upstream	-14156	13942	NearestLocation	NA
chr1	145038990	145039206	217	*	604	ENSG00000252656	145044651	145044900	+	upstream	-5661	5445	NearestLocation	RN7SKP88
chr1	145165056	145165339	284	*	605	ENSG00000201789	145149740	145149840	-	upstream	-15216	15216	NearestLocation	RNU6-1071P
chr1	145225287	145225545	259	*	606	ENSG00000255168	145209145	145319796	+	inside	16142	16142	NearestLocation	NA
chr1	145283391	145283601	211	*	607	ENSG00000163386	145289772	145370303	+	upstream	-6381	6171	NearestLocation	NA
chr1	145314019	145314220	202	*	608	ENSG00000163386	145289772	145370303	+	inside	24247	24247	NearestLocation	NA
chr1	145323580	145323825	246	*	609	ENSG00000163386	145289772	145370303	+	inside	33808	33808	NearestLocation	NA
chr1	145356309	145356531	223	*	610	ENSG00000233396	145373054	145382434	-	downstream	26125	16523	NearestLocation	NA
chr1	145365552	145365767	216	*	611	ENSG00000233396	145373054	145382434	-	downstream	16882	7287	NearestLocation	NA
chr1	145398971	145399260	290	*	612	ENSG00000168509	145413095	145417545	+	upstream	-14124	13835	NearestLocation	HJV
chr1	145502123	145502543	421	*	613	ENSG00000131795	145507598	145513536	+	upstream	-5475	5055	NearestLocation	NA
chr1	146036424	146036927	504	*	614	ENSG00000227216	146059926	146060343	+	upstream	-23502	22999	NearestLocation	NA
chr1	146037703	146037902	200	*	615	ENSG00000227216	146059926	146060343	+	upstream	-22223	22024	NearestLocation	NA
chr1	146068791	146069144	354	*	616	ENSG00000198658	146076838	146080009	+	upstream	-8047	7694	NearestLocation	NA
chr1	146119478	146119685	208	*	617	ENSG00000238765	146124161	146124283	+	upstream	-4683	4476	NearestLocation	RNA5SP57
chr1	146305781	146306127	347	*	618	ENSG00000239475	146310555	146349531	+	upstream	-4774	4428	NearestLocation	NA
chr1	146342666	146343343	678	*	619	ENSG00000186275	146373546	146467744	+	upstream	-30880	30203	NearestLocation	NA
chr1	146383564	146383772	209	*	620	ENSG00000244371	146392310	146392852	-	downstream	9288	8538	NearestLocation	NA
chr1	146383904	146384160	257	*	621	ENSG00000244371	146392310	146392852	-	downstream	8948	8150	NearestLocation	NA
chr1	146404448	146404647	200	*	622	ENSG00000244371	146392310	146392852	-	upstream	-11596	11596	NearestLocation	NA
chr1	146578088	146578416	329	*	623	ENSG00000227242	146490895	146596107	-	inside	18019	17691	NearestLocation	NA
chr1	146643939	146644194	256	*	624	ENSG00000131791	146626685	146644129	-	overlapStart	190	65	NearestLocation	PRKAB2
chr1	146711977	146712336	360	*	625	ENSG00000131778	146714291	146767443	+	upstream	-2314	1955	NearestLocation	CHD1L
chr1	147113144	147113348	205	*	626	ENSG00000162836	147101453	147142618	-	inside	29474	11691	NearestLocation	ACP6
chr1	147221101	147221349	249	*	627	ENSG00000234482	147229426	147230517	+	upstream	-8325	8077	NearestLocation	NA
chr1	147578272	147578727	456	*	628	ENSG00000225080	147601780	147602181	+	upstream	-23508	23053	NearestLocation	NA
chr1	147579442	147579650	209	*	629	ENSG00000225080	147601780	147602181	+	upstream	-22338	22130	NearestLocation	NA
chr1	147661271	147661540	270	*	630	ENSG00000238677	147665993	147666115	+	upstream	-4722	4453	NearestLocation	NA
chr1	148005880	148006163	284	*	631	ENSG00000223491	148000213	148000494	+	downstream	5667	5386	NearestLocation	NA
chr1	148006917	148007176	260	*	632	ENSG00000223491	148000213	148000494	+	downstream	6704	6423	NearestLocation	NA
chr1	148007556	148007812	257	*	633	ENSG00000223491	148000213	148000494	+	downstream	7343	7062	NearestLocation	NA
chr1	148013213	148013554	342	*	634	ENSG00000122497	148003642	148025863	-	inside	12650	9571	NearestLocation	NA
chr1	148013872	148014085	214	*	635	ENSG00000122497	148003642	148025863	-	inside	11991	10230	NearestLocation	NA
chr1	148014738	148014937	200	*	636	ENSG00000122497	148003642	148025863	-	inside	11125	10926	NearestLocation	NA
chr1	148248137	148248372	236	*	637	ENSG00000236140	148246959	148248104	-	upstream	-33	33	NearestLocation	NA
chr1	148274797	148275073	277	*	638	ENSG00000236140	148246959	148248104	-	upstream	-26693	26693	NearestLocation	NA
chr1	148327210	148327474	265	*	639	ENSG00000203832	148250249	148347506	-	inside	20296	20032	NearestLocation	NA
chr1	148356575	148357198	624	*	640	ENSG00000234367	148349256	148349657	+	downstream	7319	6918	NearestLocation	NA
chr1	148565949	148566338	390	*	641	ENSG00000227212	148574653	148575051	-	downstream	9102	8315	NearestLocation	NA
chr1	148604706	148605038	333	*	642	ENSG00000207205	148604908	148605072	-	overlapEnd	366	34	NearestLocation	RNVU1-15
chr1	148851239	148851448	210	*	643	ENSG00000235887	148852393	148853717	+	upstream	-1154	945	NearestLocation	NA
chr1	149223191	149224250	1060	*	644	ENSG00000206737	149224058	149224221	-	includeFeature	1030	29	NearestLocation	RNVU1-18
chr1	149291147	149291393	247	*	645	ENSG00000235999	149287451	149291743	+	inside	3696	350	NearestLocation	NA
chr1	149382038	149382251	214	*	646	ENSG00000234571	149372292	149379646	-	upstream	-2392	2392	NearestLocation	NA
chr1	149431163	149431382	220	*	647	ENSG00000268074	149424566	149424954	-	upstream	-6209	6209	NearestLocation	RPL22P5
chr1	149441764	149442048	285	*	648	ENSG00000268074	149424566	149424954	-	upstream	-16810	16810	NearestLocation	RPL22P5
chr1	149614433	149614632	200	*	649	ENSG00000202496	149605917	149606079	+	downstream	8516	8354	NearestLocation	NA
chr1	149748696	149749001	306	*	650	ENSG00000150337	149754227	149764074	+	upstream	-5531	5226	NearestLocation	FCGR1A
chr1	150208137	150208517	381	*	651	ENSG00000143401	150190717	150208504	-	overlapStart	367	13	NearestLocation	ANP32E
chr1	150335898	150336258	361	*	652	ENSG00000163125	150335567	150449042	+	inside	331	331	NearestLocation	RPRD2
chr1	150607522	150607721	200	*	653	ENSG00000143420	150573327	150602088	-	upstream	-5434	5434	NearestLocation	ENSA
chr1	150682636	150682835	200	*	654	ENSG00000206931	150674342	150674448	+	downstream	8294	8188	NearestLocation	RNU6-1042P
chr1	150849246	150849601	356	*	655	ENSG00000143437	150782181	150849244	-	upstream	-2	2	NearestLocation	ARNT
chr1	150894899	150895178	280	*	656	ENSG00000143379	150898739	150937213	+	upstream	-3840	3561	NearestLocation	SETDB1
chr1	150986055	150986399	345	*	657	ENSG00000143363	150980896	151008189	+	inside	5159	5159	NearestLocation	PRUNE1
chr1	151043017	151043223	207	*	658	ENSG00000143458	151043054	151098018	+	overlapStart	-37	37	NearestLocation	GABPB2
chr1	151138521	151138720	200	*	659	ENSG00000163155	151132224	151138424	-	upstream	-97	97	NearestLocation	LYSMD1
chr1	151569025	151569296	272	*	660	ENSG00000143376	151584541	151671567	+	upstream	-15516	15245	NearestLocation	SNX27
chr1	151763091	151763415	325	*	661	ENSG00000203288	151763280	151766878	+	overlapStart	-189	135	NearestLocation	TDRKH-AS1
chr1	151845342	151845723	382	*	662	ENSG00000196407	151819739	151826173	-	upstream	-19169	19169	NearestLocation	THEM5
chr1	151878214	151878431	218	*	663	ENSG00000159445	151846060	151882284	-	inside	4070	3853	NearestLocation	THEM4
chr1	152463590	152463789	200	*	664	ENSG00000186207	152483320	152484653	+	upstream	-19730	19531	NearestLocation	LCE5A
chr1	153091997	153092337	341	*	665	ENSG00000244094	153084590	153085991	-	upstream	-6006	6006	NearestLocation	SPRR2F
chr1	153310768	153310967	200	*	666	ENSG00000207321	153304098	153304204	+	downstream	6670	6564	NearestLocation	RNU6-160P
chr1	153316327	153316625	299	*	667	ENSG00000163218	153302596	153321316	-	inside	4989	4691	NearestLocation	PGLYRP4
chr1	153444641	153444853	213	*	668	ENSG00000143556	153430220	153433177	-	upstream	-11464	11464	NearestLocation	S100A7
chr1	153643556	153644039	484	*	669	ENSG00000143621	153634512	153643524	-	upstream	-32	32	NearestLocation	ILF2
chr1	153732069	153732341	273	*	670	ENSG00000238511	153726600	153726703	-	upstream	-5366	5366	NearestLocation	NA
chr1	153860983	153861476	494	*	671	ENSG00000236327	153863071	153863341	+	upstream	-2088	1595	NearestLocation	NA
chr1	153963196	153963574	379	*	672	ENSG00000177954	153963235	153964626	+	overlapStart	-39	39	NearestLocation	RPS27
chr1	153974147	153974433	287	*	673	ENSG00000252669	153970517	153970627	-	upstream	-3520	3520	NearestLocation	NA
chr1	154293360	154293838	479	*	674	ENSG00000143595	154293566	154297801	+	overlapStart	-206	206	NearestLocation	AQP10
chr1	154326022	154326255	234	*	675	ENSG00000238365	154311219	154311278	+	downstream	14803	14744	NearestLocation	RNU7-57P
chr1	154327096	154327360	265	*	676	ENSG00000238365	154311219	154311278	+	downstream	15877	15818	NearestLocation	RNU7-57P
chr1	154469531	154469832	302	*	677	ENSG00000169291	154442248	154474589	-	inside	5058	4757	NearestLocation	SHE
chr1	154599105	154599308	204	*	678	ENSG00000160710	154554538	154600475	-	inside	1370	1167	NearestLocation	ADAR
chr1	154946077	154946276	200	*	679	ENSG00000160691	154934774	154946871	-	inside	794	595	NearestLocation	SHC1
chr1	155278439	155278785	347	*	680	ENSG00000160752	155278539	155290457	+	overlapStart	-100	100	NearestLocation	FDPS
chr1	155715094	155715297	204	*	681	ENSG00000227673	155679889	155680354	-	upstream	-34740	34740	NearestLocation	NA
chr1	155715893	155716106	214	*	682	ENSG00000227673	155679889	155680354	-	upstream	-35539	35539	NearestLocation	NA
chr1	156183055	156183285	231	*	683	ENSG00000160783	156182784	156212874	+	inside	271	271	NearestLocation	PMF1
chr1	156250998	156251289	292	*	684	ENSG00000198952	156219015	156252620	-	inside	1622	1331	NearestLocation	SMG5
chr1	156252662	156252861	200	*	685	ENSG00000163472	156252726	156262976	+	overlapStart	-64	64	NearestLocation	TMEM79
chr1	156459092	156459291	200	*	686	ENSG00000206651	156453890	156454002	-	upstream	-5090	5090	NearestLocation	NA
chr1	156493892	156494356	465	*	687	ENSG00000238843	156499122	156499221	+	upstream	-5230	4766	NearestLocation	NA
chr1	156529528	156529746	219	*	688	ENSG00000183856	156495197	156542396	-	inside	12868	12650	NearestLocation	IQGAP3
chr1	156586407	156586606	200	*	689	ENSG00000272971	156584534	156585080	-	upstream	-1327	1327	NearestLocation	NA
chr1	156647398	156647622	225	*	690	ENSG00000132688	156638555	156647189	-	upstream	-209	209	NearestLocation	NES
chr1	156736905	156737105	201	*	691	ENSG00000143321	156711899	156736717	-	upstream	-188	188	NearestLocation	HDGF
chr1	156742948	156743250	303	*	692	ENSG00000143321	156711899	156736717	-	upstream	-6231	6231	NearestLocation	HDGF
chr1	156767025	156767361	337	*	693	ENSG00000198400	156785432	156851642	+	upstream	-18407	18071	NearestLocation	NTRK1
chr1	156918751	156919066	316	*	694	ENSG00000211581	156905923	156906036	-	upstream	-12715	12715	NearestLocation	MIR765
chr1	156995131	156995330	200	*	695	ENSG00000132694	156904632	157015162	-	inside	20031	19832	NearestLocation	ARHGEF11
chr1	157466025	157466288	264	*	696	ENSG00000143297	157483167	157522310	-	downstream	56285	16879	NearestLocation	FCRL5
chr1	157972378	157972577	200	*	697	ENSG00000183853	157963063	158070052	+	inside	9315	9315	NearestLocation	KIRREL1
chr1	159167613	159167892	280	*	698	ENSG00000213088	159173097	159176290	+	upstream	-5484	5205	NearestLocation	ACKR1
chr1	159174283	159174820	538	*	699	ENSG00000213088	159173097	159176290	+	inside	1186	1186	NearestLocation	ACKR1
chr1	159886107	159886418	312	*	700	ENSG00000269620	159879884	159880159	-	upstream	-5948	5948	NearestLocation	NA
chr1	159940907	159941171	265	*	701	ENSG00000224259	159931008	159948851	+	inside	9899	7680	NearestLocation	LINC01133
chr1	160001827	160002103	277	*	702	ENSG00000143315	159997462	160001783	-	upstream	-44	44	NearestLocation	PIGM
chr1	160179409	160179707	299	*	703	ENSG00000227741	160171989	160178659	-	upstream	-750	750	NearestLocation	LOC729867
chr1	160576845	160577089	245	*	704	ENSG00000066294	160510885	160549306	-	upstream	-27539	27539	NearestLocation	CD84
chr1	160621982	160622421	440	*	705	ENSG00000117090	160577890	160617085	-	upstream	-4897	4897	NearestLocation	SLAMF1
chr1	160874599	160874901	303	*	706	ENSG00000213080	160864770	160865866	+	downstream	9829	8733	NearestLocation	NA
chr1	160881295	160881598	304	*	707	ENSG00000213080	160864770	160865866	+	downstream	16525	15429	NearestLocation	NA
chr1	160919056	160919469	414	*	708	ENSG00000158764	160914815	160924589	-	inside	5533	4241	NearestLocation	ITLN2
chr1	160921227	160921441	215	*	709	ENSG00000158764	160914815	160924589	-	inside	3362	3148	NearestLocation	ITLN2
chr1	160967124	160967498	375	*	710	ENSG00000158769	160965001	160991138	-	inside	24014	2123	NearestLocation	F11R
chr1	160978672	160979021	350	*	711	ENSG00000158769	160965001	160991138	-	inside	12466	12117	NearestLocation	F11R
chr1	161015367	161015572	206	*	712	ENSG00000158773	161009041	161015767	-	inside	400	195	NearestLocation	USF1
chr1	161015680	161015986	307	*	713	ENSG00000158773	161009041	161015767	-	overlapStart	87	87	NearestLocation	USF1
chr1	161067353	161067672	320	*	714	ENSG00000162755	161068151	161070136	+	upstream	-798	479	NearestLocation	KLHDC9
chr1	161102930	161103262	333	*	715	ENSG00000158796	161090764	161102478	-	upstream	-452	452	NearestLocation	DEDD
chr1	161147491	161147737	247	*	716	ENSG00000158850	161141100	161147287	-	upstream	-204	204	NearestLocation	B4GALT3
chr1	161369384	161369673	290	*	717	ENSG00000206921	161371079	161371185	+	upstream	-1695	1406	NearestLocation	RNU6-481P
chr1	161500844	161501070	227	*	718	ENSG00000173110	161494036	161496681	+	downstream	6808	4163	NearestLocation	HSPA6
chr1	161719316	161719515	200	*	719	ENSG00000081721	161719548	161727028	+	upstream	-232	33	NearestLocation	DUSP12
chr1	161735972	161736244	273	*	720	ENSG00000226889	161735115	161736017	-	overlapStart	45	45	NearestLocation	NA
chr1	161761192	161761469	278	*	721	ENSG00000118217	161736084	161933860	+	inside	25108	25108	NearestLocation	ATF6
chr1	162161221	162161543	323	*	722	ENSG00000266144	162126897	162126972	+	downstream	34324	34249	NearestLocation	MIR4654
chr1	162163028	162163312	285	*	723	ENSG00000266144	162126897	162126972	+	downstream	36131	36056	NearestLocation	MIR4654
chr1	162342662	162342878	217	*	724	ENSG00000171722	162342993	162346660	-	downstream	3998	115	NearestLocation	SPATA46
chr1	162361659	162362037	379	*	725	ENSG00000171722	162342993	162346660	-	upstream	-14999	14999	NearestLocation	SPATA46
chr1	162367959	162368168	210	*	726	ENSG00000198574	162365056	162381928	-	inside	13969	2903	NearestLocation	SH2D1B
chr1	162859881	162860210	330	*	727	ENSG00000185860	162794248	162838605	-	upstream	-21276	21276	NearestLocation	CCDC190
chr1	163165805	163166200	396	*	728	ENSG00000232892	163131465	163182813	+	inside	34340	16613	NearestLocation	RGS5-AS1
chr1	163172729	163173236	508	*	729	ENSG00000225755	163207004	163208987	+	upstream	-34275	33768	NearestLocation	NA
chr1	163819503	163819725	223	*	730	ENSG00000212538	163892907	163893109	+	upstream	-73404	73182	NearestLocation	NA
chr1	164034359	164034665	307	*	731	ENSG00000212538	163892907	163893109	+	downstream	141452	141250	NearestLocation	NA
chr1	164110912	164111149	238	*	732	ENSG00000225719	164312242	164313101	+	upstream	-201330	201093	NearestLocation	NA
chr1	164351699	164352048	350	*	733	ENSG00000213070	164326004	164326601	+	downstream	25695	25098	NearestLocation	HMGB3P6
chr1	164448684	164448883	200	*	734	ENSG00000185630	164524821	164868533	+	upstream	-76137	75938	NearestLocation	PBX1
chr1	164652567	164652766	200	*	735	ENSG00000269887	164649322	164650036	+	downstream	3245	2531	NearestLocation	NA
chr1	164681452	164681849	398	*	736	ENSG00000269887	164649322	164650036	+	downstream	32130	31416	NearestLocation	NA
chr1	164742013	164742305	293	*	737	ENSG00000233693	164738353	164743878	-	inside	1865	1573	NearestLocation	PBX1-AS1
chr1	164774868	164775167	300	*	738	ENSG00000271917	164797673	164799189	+	upstream	-22805	22506	NearestLocation	NA
chr1	164793919	164794119	201	*	739	ENSG00000271917	164797673	164799189	+	upstream	-3754	3554	NearestLocation	NA
chr1	164827501	164827813	313	*	740	ENSG00000201987	164823468	164823569	+	downstream	4033	3932	NearestLocation	NA
chr1	165379295	165379548	254	*	741	ENSG00000143171	165370159	165414433	-	inside	35138	9136	NearestLocation	RXRG
chr1	165429692	165429899	208	*	742	ENSG00000143171	165370159	165414433	-	upstream	-15259	15259	NearestLocation	RXRG
chr1	165454996	165455235	240	*	743	ENSG00000230748	165466961	165467585	+	upstream	-11965	11726	NearestLocation	NA
chr1	165600499	165600761	263	*	744	ENSG00000143198	165600098	165631033	+	inside	401	401	NearestLocation	MGST3
chr1	165785079	165785321	243	*	745	ENSG00000230659	165788590	165789024	+	upstream	-3511	3269	NearestLocation	RPL26P12
chr1	165806385	165806663	279	*	746	ENSG00000143183	165696032	165796992	-	upstream	-9393	9393	NearestLocation	TMCO1
chr1	165812000	165812318	319	*	747	ENSG00000143183	165696032	165796992	-	upstream	-15008	15008	NearestLocation	TMCO1
chr1	165822920	165823214	295	*	748	ENSG00000143183	165696032	165796992	-	upstream	-25928	25928	NearestLocation	TMCO1
chr1	166574723	166574971	249	*	749	ENSG00000215834	166572912	166600637	+	inside	1811	1811	NearestLocation	FMO9P
chr1	166579751	166579958	208	*	750	ENSG00000215834	166572912	166600637	+	inside	6839	6839	NearestLocation	FMO9P
chr1	166674707	166675003	297	*	751	ENSG00000234984	166635122	166651433	+	downstream	39585	23274	NearestLocation	NA
chr1	166809871	166810182	312	*	752	ENSG00000143157	166808681	166825581	+	inside	1190	1190	NearestLocation	POGK
chr1	166896516	166896795	280	*	753	ENSG00000237096	166864948	166877317	-	upstream	-19199	19199	NearestLocation	NA
chr1	167502960	167503231	272	*	754	ENSG00000227776	167488773	167489823	+	downstream	14187	13137	NearestLocation	NA
chr1	167604601	167604953	353	*	755	ENSG00000241666	167596622	167599911	-	upstream	-4690	4690	NearestLocation	NA
chr1	167838821	167839300	480	*	756	ENSG00000143199	167778625	167883453	-	inside	44632	44153	NearestLocation	ADCY10
chr1	168137115	168137314	200	*	757	ENSG00000143155	168148171	168169950	+	upstream	-11056	10857	NearestLocation	TIPRL
chr1	168311979	168312240	262	*	758	ENSG00000227722	168338292	168338839	+	upstream	-26313	26052	NearestLocation	NA
chr1	168335370	168335602	233	*	759	ENSG00000227722	168338292	168338839	+	upstream	-2922	2690	NearestLocation	NA
chr1	168451574	168451789	216	*	760	ENSG00000237658	168433452	168464882	-	inside	13308	13093	NearestLocation	NA
chr1	168467422	168467760	339	*	761	ENSG00000237658	168433452	168464882	-	upstream	-2540	2540	NearestLocation	NA
chr1	168482453	168482662	210	*	762	ENSG00000237658	168433452	168464882	-	upstream	-17571	17571	NearestLocation	NA
chr1	168515271	168515558	288	*	763	ENSG00000143185	168510003	168513235	-	upstream	-2036	2036	NearestLocation	XCL2
chr1	168543582	168543781	200	*	764	ENSG00000143184	168545711	168551315	+	upstream	-2129	1930	NearestLocation	XCL1
chr1	168572899	168573160	262	*	765	ENSG00000229757	168547891	168548677	-	upstream	-24222	24222	NearestLocation	RPL7AP21
chr1	168737095	168737303	209	*	766	ENSG00000235736	168732603	168743728	-	inside	6633	4492	NearestLocation	NA
chr1	168959518	168959731	214	*	767	ENSG00000213063	168907705	168908161	+	downstream	51813	51357	NearestLocation	NA
chr1	168997319	168997792	474	*	768	ENSG00000252987	169036502	169036602	+	upstream	-39183	38710	NearestLocation	RNA5SP66
chr1	169056307	169056644	338	*	769	ENSG00000203601	168873143	169056243	-	upstream	-64	64	NearestLocation	LINC00970
chr1	169162689	169162964	276	*	770	ENSG00000143153	169074935	169101960	+	downstream	87754	60729	NearestLocation	ATP1B1
chr1	169556153	169556352	200	*	771	ENSG00000198734	169483404	169555826	-	upstream	-327	327	NearestLocation	F5
chr1	169573397	169573605	209	*	772	ENSG00000198734	169483404	169555826	-	upstream	-17571	17571	NearestLocation	F5
chr1	169692012	169692211	200	*	773	ENSG00000188404	169659808	169680839	-	upstream	-11173	11173	NearestLocation	SELL
chr1	169714712	169714928	217	*	774	ENSG00000230704	169732070	169733789	-	downstream	19077	17142	NearestLocation	NA
chr1	170043438	170043720	283	*	775	ENSG00000075945	169890467	170054349	-	inside	10911	10629	NearestLocation	KIFAP3
chr1	170044008	170044236	229	*	776	ENSG00000075945	169890467	170054349	-	inside	10341	10113	NearestLocation	KIFAP3
chr1	170115178	170115570	393	*	777	ENSG00000203740	170115142	170136931	+	inside	36	36	NearestLocation	METTL11B
chr1	170190106	170190422	317	*	778	ENSG00000238051	170180151	170180598	-	upstream	-9508	9508	NearestLocation	ISCUP1
chr1	170560512	170560758	247	*	779	ENSG00000225545	170556390	170557377	-	upstream	-3135	3135	NearestLocation	NA
chr1	170667931	170668238	308	*	780	ENSG00000271811	170636522	170638566	+	downstream	31409	29365	NearestLocation	NA
chr1	170898955	170899189	235	*	781	ENSG00000117501	170904612	171033906	+	upstream	-5657	5423	NearestLocation	MROH9
chr1	170938671	170939160	490	*	782	ENSG00000117501	170904612	171033906	+	inside	34059	34059	NearestLocation	MROH9
chr1	171022205	171022425	221	*	783	ENSG00000215924	171010488	171010581	-	upstream	-11624	11624	NearestLocation	NA
chr1	171366192	171366404	213	*	784	ENSG00000239428	171361368	171361929	+	downstream	4824	4263	NearestLocation	GM2AP2
chr1	171584293	171584511	219	*	785	ENSG00000034971	171604557	171621823	-	downstream	37530	20046	NearestLocation	MYOC
chr1	171662412	171662618	207	*	786	ENSG00000230364	171652268	171653578	-	upstream	-8834	8834	NearestLocation	RPL4P3
chr1	171750077	171750514	438	*	787	ENSG00000010165	171750788	171783163	+	upstream	-711	274	NearestLocation	EEF1AKNMT
chr1	172421822	172422057	236	*	788	ENSG00000135845	172339329	172413230	-	upstream	-8592	8592	NearestLocation	PIGC
chr1	172956969	172957203	235	*	789	ENSG00000120337	173009100	173020103	-	downstream	63134	51897	NearestLocation	TNFSF18
chr1	173272314	173272643	330	*	790	ENSG00000251817	173250216	173250309	+	downstream	22098	22005	NearestLocation	NA
chr1	173443849	173444368	520	*	791	ENSG00000117592	173446405	173457946	+	upstream	-2556	2037	NearestLocation	PRDX6
chr1	173683970	173684200	231	*	792	ENSG00000076321	173684080	173755840	+	overlapStart	-110	110	NearestLocation	KLHL20
chr1	173793513	173793929	417	*	793	ENSG00000120334	173768688	173793858	-	overlapStart	345	71	NearestLocation	CENPL
chr1	173794070	173794309	240	*	794	ENSG00000120334	173768688	173793858	-	upstream	-212	212	NearestLocation	CENPL
chr1	174082018	174082237	220	*	795	ENSG00000225713	174059274	174059612	-	upstream	-22406	22406	NearestLocation	RPL30P1
chr1	174967739	174967938	200	*	796	ENSG00000116161	174968300	174980851	+	upstream	-561	362	NearestLocation	CACYBP
chr1	175379150	175379362	213	*	797	ENSG00000260990	175276354	175304595	+	downstream	102796	74555	NearestLocation	NA
chr1	175526595	175526803	209	*	798	ENSG00000235628	175507911	175525954	-	upstream	-641	641	NearestLocation	NA
chr1	175560545	175560824	280	*	799	ENSG00000235628	175507911	175525954	-	upstream	-34591	34591	NearestLocation	NA
chr1	176027607	176027828	222	*	800	ENSG00000228686	175986413	175987896	+	downstream	41194	39711	NearestLocation	NA
chr1	176333568	176333769	202	*	801	ENSG00000225904	176336835	176337537	-	downstream	3969	3066	NearestLocation	NA
chr1	176570569	176570820	252	*	802	ENSG00000237514	176585404	176585925	-	downstream	15356	14584	NearestLocation	NA
chr1	176625499	176625700	202	*	803	ENSG00000237514	176585404	176585925	-	upstream	-39574	39574	NearestLocation	NA
chr1	176660880	176661115	236	*	804	ENSG00000237514	176585404	176585925	-	upstream	-74955	74955	NearestLocation	NA
chr1	177079652	177079870	219	*	805	ENSG00000152092	176826438	177134109	-	inside	54457	54239	NearestLocation	ASTN1
chr1	177271566	177271835	270	*	806	ENSG00000224968	177320722	177335408	+	upstream	-49156	48887	NearestLocation	LINC01645
chr1	177494365	177494735	371	*	807	ENSG00000266393	177522005	177522095	+	upstream	-27640	27270	NearestLocation	NA
chr1	178279808	178280118	311	*	808	ENSG00000213058	178380751	178381107	+	upstream	-100943	100633	NearestLocation	NA
chr1	178285781	178285992	212	*	809	ENSG00000213058	178380751	178381107	+	upstream	-94970	94759	NearestLocation	NA
chr1	178475860	178476152	293	*	810	ENSG00000240021	178482212	178517734	+	upstream	-6352	6060	NearestLocation	TEX35
chr1	178995821	178996050	230	*	811	ENSG00000116199	178994939	179045697	+	inside	882	882	NearestLocation	FAM20B
chr1	179016467	179016830	364	*	812	ENSG00000232750	179004444	179004787	-	upstream	-11680	11680	NearestLocation	NA
chr1	179847164	179847363	200	*	813	ENSG00000169905	179809102	179846938	-	upstream	-226	226	NearestLocation	TOR1AIP2
chr1	180086389	180086906	518	*	814	ENSG00000261817	180086275	180093025	-	inside	6636	114	NearestLocation	NA
chr1	180491385	180491598	214	*	815	ENSG00000206905	180488152	180488255	-	upstream	-3130	3130	NearestLocation	NA
chr1	180823651	180823982	332	*	816	ENSG00000266825	180797031	180797128	-	upstream	-26523	26523	NearestLocation	NA
chr1	180902383	180902720	338	*	817	ENSG00000135835	180882290	180920750	+	inside	20093	18030	NearestLocation	KIAA1614
chr1	180910773	180910993	221	*	818	ENSG00000232586	180918835	180924023	-	downstream	13250	7842	NearestLocation	KIAA1614-AS1
chr1	181033439	181033731	293	*	819	ENSG00000162783	181057638	181059977	+	upstream	-24199	23907	NearestLocation	IER5
chr1	181111791	181112024	234	*	820	ENSG00000237292	181143620	181151344	+	upstream	-31829	31596	NearestLocation	LINC01732
chr1	181122134	181122463	330	*	821	ENSG00000237292	181143620	181151344	+	upstream	-21486	21157	NearestLocation	LINC01732
chr1	181723086	181723340	255	*	822	ENSG00000252977	181740702	181740780	+	upstream	-17616	17362	NearestLocation	RNA5SP70
chr1	182023903	182024119	217	*	823	ENSG00000179930	182023705	182030847	-	inside	6944	198	NearestLocation	ZNF648
chr1	182169580	182169824	245	*	824	ENSG00000232096	182151865	182152231	-	upstream	-17349	17349	NearestLocation	NA
chr1	182838493	182838713	221	*	825	ENSG00000135829	182808504	182856886	+	inside	29989	18173	NearestLocation	DHX9
chr1	183006350	183006657	308	*	826	ENSG00000135862	182992595	183114727	+	inside	13755	13755	NearestLocation	LAMC1
chr1	183256485	183256815	331	*	827	ENSG00000233562	183235737	183236420	+	downstream	20748	20065	NearestLocation	RPS3AP8
chr1	183402711	183403120	410	*	828	ENSG00000157064	183217372	183387737	-	upstream	-14974	14974	NearestLocation	NMNAT2
chr1	183441022	183441422	401	*	829	ENSG00000116698	183441351	183567381	+	overlapStart	-329	71	NearestLocation	SMG7
chr1	183548117	183548348	232	*	830	LRG_88	183524697	183559739	-	inside	11622	11391	NearestLocation	NA
chr1	183603006	183603301	296	*	831	ENSG00000162704	183592401	183604892	-	inside	1886	1591	NearestLocation	ARPC5
chr1	183609335	183609557	223	*	832	ENSG00000143344	183605220	183897665	+	inside	4115	4115	NearestLocation	RGL1
chr1	183705592	183705878	287	*	833	ENSG00000227554	183723553	183724072	-	downstream	18480	17675	NearestLocation	NA
chr1	183781823	183782106	284	*	834	ENSG00000227554	183723553	183724072	-	upstream	-57751	57751	NearestLocation	NA
chr1	183914645	183914864	220	*	835	ENSG00000198756	183898796	184006863	-	inside	92218	15849	NearestLocation	COLGALT2
chr1	183956851	183957072	222	*	836	ENSG00000198756	183898796	184006863	-	inside	50012	49791	NearestLocation	COLGALT2
chr1	183965453	183965951	499	*	837	ENSG00000198756	183898796	184006863	-	inside	41410	40912	NearestLocation	COLGALT2
chr1	184044605	184044804	200	*	838	ENSG00000198860	184020811	184043346	+	downstream	23794	1259	NearestLocation	TSEN15
chr1	184211485	184211883	399	*	839	ENSG00000199840	184140848	184140957	-	upstream	-70528	70528	NearestLocation	NA
chr1	184265534	184265922	389	*	840	ENSG00000207080	184284792	184284899	+	upstream	-19258	18870	NearestLocation	NA
chr1	184591215	184591436	222	*	841	ENSG00000232036	184535645	184536969	+	downstream	55570	54246	NearestLocation	LOC100129573
chr1	184724521	184724726	206	*	842	ENSG00000116406	184659365	184724047	-	upstream	-474	474	NearestLocation	EDEM3
chr1	184987105	184987455	351	*	843	ENSG00000201312	184984083	184984199	-	upstream	-2906	2906	NearestLocation	RNA5SP72
chr1	185210285	185210619	335	*	844	ENSG00000201421	185220445	185220543	+	upstream	-10160	9826	NearestLocation	NA
chr1	185253833	185254138	306	*	845	ENSG00000238061	185249976	185250948	+	downstream	3857	2885	NearestLocation	NA
chr1	185286627	185286914	288	*	846	ENSG00000273004	185286911	185287662	+	overlapStart	-284	3	NearestLocation	NA
chr1	185536129	185536328	200	*	847	ENSG00000228309	185527504	185597659	-	inside	61530	8625	NearestLocation	LINC01350
chr1	185571836	185572053	218	*	848	ENSG00000228309	185527504	185597659	-	inside	25823	25606	NearestLocation	LINC01350
chr1	185623771	185624020	250	*	849	ENSG00000261729	185624134	185626300	+	upstream	-363	114	NearestLocation	GS1-204I12.4
chr1	185703033	185703258	226	*	850	ENSG00000143341	185703683	186160085	+	upstream	-650	425	NearestLocation	HMCN1
chr1	185758812	185759144	333	*	851	ENSG00000143341	185703683	186160085	+	inside	55129	55129	NearestLocation	HMCN1
chr1	186181694	186181906	213	*	852	ENSG00000224691	186145946	186146434	-	upstream	-35260	35260	NearestLocation	NA
chr1	186317324	186317758	435	*	853	ENSG00000047410	186280784	186344825	-	inside	27501	27067	NearestLocation	TPR
chr1	186344496	186344804	309	*	854	ENSG00000047410	186280784	186344825	-	inside	329	21	NearestLocation	TPR
chr1	186968757	186968956	200	*	855	ENSG00000236030	187061974	187329455	+	upstream	-93217	93018	NearestLocation	NA
chr1	187110601	187110862	262	*	856	ENSG00000236030	187061974	187329455	+	inside	48627	48627	NearestLocation	NA
chr1	187205857	187206156	300	*	857	ENSG00000236030	187061974	187329455	+	inside	143883	123299	NearestLocation	NA
chr1	187235243	187235576	334	*	858	ENSG00000236030	187061974	187329455	+	inside	173269	93879	NearestLocation	NA
chr1	187366467	187366840	374	*	859	ENSG00000231599	187412738	187446354	+	upstream	-46271	45898	NearestLocation	NA
chr1	187809768	187810080	313	*	860	ENSG00000223847	187683374	187683866	-	upstream	-125902	125902	NearestLocation	NA
chr1	187961554	187961811	258	*	861	ENSG00000150732	188036429	188036656	-	downstream	75102	74618	NearestLocation	NA
chr1	188355373	188355612	240	*	862	ENSG00000225006	188477669	188505596	+	upstream	-122296	122057	NearestLocation	NA
chr1	189744702	189744972	271	*	863	ENSG00000232212	189744595	189784048	+	inside	107	107	NearestLocation	LINC01701
chr1	190152848	190153108	261	*	864	ENSG00000225811	190234028	190331400	+	upstream	-81180	80920	NearestLocation	NA
chr1	190284431	190284695	265	*	865	ENSG00000225811	190234028	190331400	+	inside	50403	46705	NearestLocation	NA
chr1	190676634	190677052	419	*	866	ENSG00000236025	190750917	190751125	+	upstream	-74283	73865	NearestLocation	NA
chr1	191681265	191681507	243	*	867	ENSG00000228215	191844625	191980390	+	upstream	-163360	163118	NearestLocation	NA
chr1	191858214	191858524	311	*	868	ENSG00000223344	191827837	191859359	-	inside	1145	835	NearestLocation	NA
chr1	191864871	191865088	218	*	869	ENSG00000223344	191827837	191859359	-	upstream	-5512	5512	NearestLocation	NA
chr1	192404805	192405085	281	*	870	ENSG00000221145	192460258	192460350	-	downstream	55545	55173	NearestLocation	NA
chr1	192472356	192472564	209	*	871	ENSG00000221145	192460258	192460350	-	upstream	-12006	12006	NearestLocation	NA
chr1	193084704	193084986	283	*	872	LRG_507	193091088	193223945	+	upstream	-6384	6102	NearestLocation	NA
chr1	193091005	193091204	200	*	873	ENSG00000134371	193091147	193223031	+	overlapStart	-142	57	NearestLocation	CDC73
chr1	193126663	193126882	220	*	874	ENSG00000221680	193105633	193105713	+	downstream	21030	20950	NearestLocation	MIR1278
chr1	193226341	193226541	201	*	875	ENSG00000232077	193273875	193335083	+	upstream	-47534	47334	NearestLocation	LINC01031
chr1	193277647	193277902	256	*	876	ENSG00000232077	193273875	193335083	+	inside	3772	3772	NearestLocation	LINC01031
chr1	193449992	193450207	216	*	877	ENSG00000232077	193273875	193335083	+	downstream	176117	114909	NearestLocation	LINC01031
chr1	193538320	193538568	249	*	878	ENSG00000226640	193648024	193696165	+	upstream	-109704	109456	NearestLocation	NA
chr1	193557625	193557824	200	*	879	ENSG00000226640	193648024	193696165	+	upstream	-90399	90200	NearestLocation	NA
chr1	193929561	193929760	200	*	880	ENSG00000227240	194118603	194167824	+	upstream	-189042	188843	NearestLocation	NA
chr1	194043075	194043296	222	*	881	ENSG00000227240	194118603	194167824	+	upstream	-75528	75307	NearestLocation	NA
chr1	195128961	195129234	274	*	882	ENSG00000265108	195095811	195095906	+	downstream	33150	33055	NearestLocation	NA
chr1	196084863	196085062	200	*	883	ENSG00000227421	196014126	196030203	-	upstream	-54660	54660	NearestLocation	NA
chr1	196385217	196385431	215	*	884	ENSG00000265986	196551543	196551611	-	downstream	166394	166112	NearestLocation	MIR4735
chr1	196712464	196712668	205	*	885	ENSG00000116785	196743925	196763203	+	upstream	-31461	31257	NearestLocation	CFHR3
chr1	197149491	197149819	329	*	886	ENSG00000177888	197122810	197169672	-	inside	20181	19853	NearestLocation	ZBTB41
chr1	197182348	197182554	207	*	887	ENSG00000237861	197191352	197192385	+	upstream	-9004	8798	NearestLocation	NA
chr1	197819310	197819515	206	*	888	ENSG00000203724	197871777	197876497	+	upstream	-52467	52262	NearestLocation	C1orf53
chr1	198136812	198137109	298	*	889	ENSG00000151414	198126093	198291550	+	inside	10719	10719	NearestLocation	NEK7
chr1	198234131	198234602	472	*	890	ENSG00000232824	198166909	198167316	-	upstream	-66815	66815	NearestLocation	NA
chr1	198385405	198385628	224	*	891	ENSG00000151418	198492352	198510075	-	downstream	124670	106724	NearestLocation	ATP6V1G3
chr1	200299976	200300437	462	*	892	ENSG00000213045	200298289	200298805	+	downstream	1687	1171	NearestLocation	NA
chr1	200457873	200458089	217	*	893	ENSG00000230623	200443048	200447421	+	downstream	14825	10452	NearestLocation	NA
chr1	200609098	200609358	261	*	894	ENSG00000118193	200520628	200589862	-	upstream	-19236	19236	NearestLocation	KIF14
chr1	200637731	200638094	364	*	895	ENSG00000260088	200638635	200663378	+	upstream	-904	541	NearestLocation	DDX59-AS1
chr1	200767694	200767893	200	*	896	ENSG00000118200	200708686	200829832	+	inside	59008	59008	NearestLocation	CAMSAP2
chr1	200780973	200781247	275	*	897	ENSG00000231333	200832936	200833280	+	upstream	-51963	51689	NearestLocation	RPL34P6
chr1	201237671	201237928	258	*	898	ENSG00000081277	201252580	201302121	+	upstream	-14909	14652	NearestLocation	PKP1
chr1	201278611	201278886	276	*	899	ENSG00000081277	201252580	201302121	+	inside	26031	23235	NearestLocation	PKP1
chr1	201346947	201347232	286	*	900	ENSG00000118194	201328136	201346890	-	upstream	-57	57	NearestLocation	TNNT2
chr1	201389277	201389722	446	*	901	ENSG00000227048	201398103	201398489	+	upstream	-8826	8381	NearestLocation	NA
chr1	201455282	201455601	320	*	902	ENSG00000174307	201434620	201438365	-	upstream	-16917	16917	NearestLocation	PHLDA3
chr1	201463353	201463674	322	*	903	ENSG00000224536	201476369	201502736	+	upstream	-13016	12695	NearestLocation	LOC107985246
chr1	201690875	201691084	210	*	904	ENSG00000264802	201688636	201688755	+	downstream	2239	2120	NearestLocation	MIR5191
chr1	201700735	201701080	346	*	905	ENSG00000200942	201702534	201702633	+	upstream	-1799	1454	NearestLocation	RNU6-501P
chr1	201742476	201742731	256	*	906	ENSG00000221028	201777739	201777830	+	upstream	-35263	35008	NearestLocation	MIR1231
chr1	201910607	201910818	212	*	907	ENSG00000163431	201865580	201915715	-	inside	5108	4897	NearestLocation	LMOD1
chr1	201977195	201977401	207	*	908	ENSG00000163435	201977073	201986316	+	inside	122	122	NearestLocation	ELF3
chr1	201998873	201999243	371	*	909	ENSG00000232296	201997734	201997820	+	downstream	1139	1053	NearestLocation	NA
chr1	202018261	202018504	244	*	910	ENSG00000235811	202008979	202009062	+	downstream	9282	9199	NearestLocation	NA
chr1	202045232	202045589	358	*	911	ENSG00000227109	202065887	202066106	+	upstream	-20655	20298	NearestLocation	CRIP1P3
chr1	202427956	202428243	288	*	912	ENSG00000236439	202440937	202441258	-	downstream	13302	12694	NearestLocation	NA
chr1	202431424	202432004	581	*	913	ENSG00000236439	202440937	202441258	-	downstream	9834	8933	NearestLocation	NA
chr1	202927717	202927959	243	*	914	ENSG00000159346	202909951	202927700	-	upstream	-17	17	NearestLocation	ADIPOR1
chr1	203009038	203009237	200	*	915	ENSG00000143847	202995626	203047868	+	inside	13412	13412	NearestLocation	PPFIA4
chr1	203009585	203009927	343	*	916	ENSG00000143847	202995626	203047868	+	inside	13959	13959	NearestLocation	PPFIA4
chr1	203109955	203110202	248	*	917	ENSG00000224671	203113092	203122028	-	downstream	12073	2890	NearestLocation	NA
chr1	203238160	203238464	305	*	918	ENSG00000133063	203181955	203242769	-	inside	4609	4305	NearestLocation	CHIT1
chr1	203251268	203251685	418	*	919	ENSG00000231507	203256280	203257929	+	upstream	-5012	4595	NearestLocation	NA
chr1	203275528	203275742	215	*	920	ENSG00000159388	203274619	203278730	+	inside	909	909	NearestLocation	BTG2
chr1	203333451	203333892	442	*	921	ENSG00000229652	203322493	203322779	-	upstream	-10672	10672	NearestLocation	NA
chr1	203649928	203650184	257	*	922	ENSG00000236035	203626097	203626888	-	upstream	-23040	23040	NearestLocation	NA
chr1	203671217	203671429	213	*	923	ENSG00000221643	203698709	203698833	+	upstream	-27492	27280	NearestLocation	SNORA77
chr1	203695714	203696001	288	*	924	ENSG00000221643	203698709	203698833	+	upstream	-2995	2708	NearestLocation	SNORA77
chr1	203973016	203973224	209	*	925	ENSG00000211554	203968373	203968471	-	upstream	-4545	4545	NearestLocation	NA
chr1	204170496	204170715	220	*	926	ENSG00000170498	204159469	204165614	-	upstream	-4882	4882	NearestLocation	KISS1
chr1	204258447	204258798	352	*	927	ENSG00000231691	204246133	204247076	+	downstream	12314	11371	NearestLocation	NA
chr1	204304198	204304454	257	*	928	ENSG00000219133	204315904	204316386	-	downstream	12188	11450	NearestLocation	RPL21P19
chr1	204435210	204435511	302	*	929	ENSG00000133056	204391756	204463852	-	inside	28642	28341	NearestLocation	PIK3C2B
chr1	204462961	204463293	333	*	930	ENSG00000133056	204391756	204463852	-	inside	891	559	NearestLocation	PIK3C2B
chr1	204475891	204476310	420	*	931	ENSG00000198625	204485511	204542871	+	upstream	-9620	9201	NearestLocation	MDM4
chr1	204485165	204485401	237	*	932	ENSG00000198625	204485511	204542871	+	upstream	-346	110	NearestLocation	MDM4
chr1	204534840	204535085	246	*	933	ENSG00000200408	204531541	204531649	-	upstream	-3191	3191	NearestLocation	RNA5SP74
chr1	204593953	204594378	426	*	934	ENSG00000240219	204595903	204598840	+	upstream	-1950	1525	NearestLocation	NA
chr1	204703112	204703372	261	*	935	ENSG00000251861	204697119	204697234	+	downstream	5993	5878	NearestLocation	NA
chr1	204884957	204885182	226	*	936	ENSG00000252946	204873875	204873946	-	upstream	-11011	11011	NearestLocation	NA
chr1	205225130	205225626	497	*	937	ENSG00000225063	205202949	205205995	-	upstream	-19135	19135	NearestLocation	NA
chr1	205341610	205341894	285	*	938	ENSG00000226235	205342380	205356568	+	upstream	-770	486	NearestLocation	LEMD1-AS1
chr1	205680313	205680528	216	*	939	ENSG00000268313	205682497	205684153	+	upstream	-2184	1969	NearestLocation	NA
chr1	205719535	205719782	248	*	940	ENSG00000069275	205681947	205719404	-	upstream	-131	131	NearestLocation	NUCKS1
chr1	206110108	206110440	333	*	941	ENSG00000196550	206136916	206155151	+	upstream	-26808	26476	NearestLocation	FAM72A
chr1	206162995	206163250	256	*	942	ENSG00000236889	206164084	206166270	+	upstream	-1089	834	NearestLocation	NA
chr1	206240591	206240871	281	*	943	ENSG00000198049	206223976	206231639	+	downstream	16615	8952	NearestLocation	AVPR1B
chr1	206257755	206258050	296	*	944	ENSG00000252692	206261008	206261093	-	downstream	3338	2958	NearestLocation	NA
chr1	206273324	206273523	200	*	945	ENSG00000252692	206261008	206261093	-	upstream	-12231	12231	NearestLocation	NA
chr1	206499361	206499645	285	*	946	ENSG00000229509	206506678	206506789	-	downstream	7428	7033	NearestLocation	NA
chr1	206524800	206525138	339	*	947	ENSG00000163486	206516200	206637783	+	inside	8600	8600	NearestLocation	NA
chr1	206589862	206590370	509	*	948	ENSG00000233501	206552219	206554954	-	upstream	-34908	34908	NearestLocation	NA
chr1	206612576	206612848	273	*	949	ENSG00000143466	206643791	206670223	+	upstream	-31215	30943	NearestLocation	NA
chr1	206674438	206674685	248	*	950	ENSG00000261000	206677281	206677789	+	upstream	-2843	2596	NearestLocation	NA
chr1	206837435	206837735	301	*	951	ENSG00000252853	206855308	206855380	+	upstream	-17873	17573	NearestLocation	NA
chr1	206845544	206845763	220	*	952	ENSG00000252853	206855308	206855380	+	upstream	-9764	9545	NearestLocation	NA
chr1	207115081	207115437	357	*	953	ENSG00000162896	207101863	207119811	-	inside	4730	4374	NearestLocation	PIGR
chr1	207906416	207906653	238	*	954	LRG_155	207925383	207968861	+	upstream	-18967	18730	NearestLocation	NA
chr1	208195202	208195509	308	*	955	ENSG00000174059	208057594	208084747	-	upstream	-110455	110455	NearestLocation	CD34
chr1	208256885	208257142	258	*	956	ENSG00000076356	208195587	208417665	-	inside	160780	61298	NearestLocation	PLXNA2
chr1	208274343	208274804	462	*	957	ENSG00000076356	208195587	208417665	-	inside	143322	78756	NearestLocation	PLXNA2
chr1	208342505	208342763	259	*	958	ENSG00000076356	208195587	208417665	-	inside	75160	74902	NearestLocation	PLXNA2
chr1	208418640	208418934	295	*	959	ENSG00000076356	208195587	208417665	-	upstream	-975	975	NearestLocation	PLXNA2
chr1	208424231	208424461	231	*	960	ENSG00000226843	208428635	208428721	-	downstream	4490	4174	NearestLocation	NA
chr1	208547976	208548331	356	*	961	ENSG00000226843	208428635	208428721	-	upstream	-119255	119255	NearestLocation	NA
chr1	208594962	208595180	219	*	962	ENSG00000226843	208428635	208428721	-	upstream	-166241	166241	NearestLocation	NA
chr1	208825873	208826072	200	*	963	ENSG00000259815	208800086	208801430	-	upstream	-24443	24443	NearestLocation	NA
chr1	209422725	209422966	242	*	964	ENSG00000224540	209405541	209406764	+	downstream	17184	15961	NearestLocation	NA
chr1	209557392	209557599	208	*	965	ENSG00000231648	209541007	209553035	+	downstream	16385	4357	NearestLocation	NA
chr1	209623797	209624109	313	*	966	ENSG00000230937	209602165	209606183	+	downstream	21632	17614	NearestLocation	MIR205HG
chr1	210704878	210705319	442	*	967	ENSG00000270936	210635689	210636356	-	upstream	-68522	68522	NearestLocation	BPNT2P
chr1	210755966	210756272	307	*	968	ENSG00000270936	210635689	210636356	-	upstream	-119610	119610	NearestLocation	BPNT2P
chr1	210837380	210837733	354	*	969	ENSG00000224668	211032519	211035627	-	downstream	198247	194786	NearestLocation	IPO8P1
chr1	211308749	211309034	286	*	970	ENSG00000143473	210856555	211307457	-	upstream	-1292	1292	NearestLocation	KCNH1
chr1	211868995	211869194	200	*	971	ENSG00000231057	211849104	211863445	+	downstream	19891	5550	NearestLocation	NA
chr1	211927044	211927291	248	*	972	ENSG00000226868	211889270	211898744	-	upstream	-28300	28300	NearestLocation	NA
chr1	212106907	212107290	384	*	973	ENSG00000233626	212109591	212109976	+	upstream	-2684	2301	NearestLocation	NA
chr1	212393058	212393407	350	*	974	ENSG00000226251	212398620	212412319	-	downstream	19261	5213	NearestLocation	LINC02608
chr1	212567174	212567428	255	*	975	ENSG00000065600	212537273	212588243	-	inside	21069	20815	NearestLocation	PACC1
chr1	212801433	212801689	257	*	976	ENSG00000235862	212797626	212800113	-	upstream	-1320	1320	NearestLocation	NA
chr1	212965195	212965568	374	*	977	ENSG00000203705	212965170	212989968	+	inside	25	25	NearestLocation	TATDN3
chr1	213218795	213218996	202	*	978	ENSG00000136643	213224589	213448116	+	upstream	-5794	5593	NearestLocation	RPS6KC1
chr1	213224472	213224709	238	*	979	ENSG00000136643	213224589	213448116	+	overlapStart	-117	117	NearestLocation	RPS6KC1
chr1	213550133	213550550	418	*	980	ENSG00000228646	213602051	213602420	-	downstream	52287	51501	NearestLocation	RPL31P13
chr1	213573126	213573356	231	*	981	ENSG00000228646	213602051	213602420	-	downstream	29294	28695	NearestLocation	RPL31P13
chr1	213614161	213614548	388	*	982	ENSG00000228646	213602051	213602420	-	upstream	-11741	11741	NearestLocation	RPL31P13
chr1	213980035	213980259	225	*	983	ENSG00000228255	213904759	213967930	+	downstream	75276	12105	NearestLocation	NA
chr1	214407550	214407759	210	*	984	ENSG00000143499	214454445	214510474	+	upstream	-46895	46686	NearestLocation	SMYD2
chr1	214451047	214451480	434	*	985	ENSG00000143499	214454445	214510474	+	upstream	-3398	2965	NearestLocation	SMYD2
chr1	214593128	214593327	200	*	986	ENSG00000228470	214517515	214530958	-	upstream	-62170	62170	NearestLocation	NA
chr1	214603494	214603702	209	*	987	ENSG00000213036	214656156	214656730	-	downstream	53236	52454	NearestLocation	NA
chr1	214650752	214651052	301	*	988	ENSG00000213036	214656156	214656730	-	downstream	5978	5104	NearestLocation	NA
chr1	216779497	216779696	200	*	989	ENSG00000042781	215796236	216596738	-	upstream	-182759	182759	NearestLocation	USH2A
chr1	217627220	217627543	324	*	990	ENSG00000229841	217665317	217667625	+	upstream	-38097	37774	NearestLocation	NA
chr1	217696641	217696840	200	*	991	ENSG00000229841	217665317	217667625	+	downstream	31324	29016	NearestLocation	NA
chr1	218030418	218030683	266	*	992	ENSG00000228247	218023745	218023975	-	upstream	-6443	6443	NearestLocation	NA
chr1	218358230	218358439	210	*	993	ENSG00000201493	218303137	218303294	+	downstream	55093	54936	NearestLocation	RNU1-141P
chr1	218478061	218478280	220	*	994	ENSG00000229016	218474604	218475314	-	upstream	-2747	2747	NearestLocation	NA
chr1	218512697	218512917	221	*	995	ENSG00000223375	218511883	218512098	+	downstream	814	599	NearestLocation	NA
chr1	218518613	218518829	217	*	996	ENSG00000232480	218517538	218519020	-	inside	407	191	NearestLocation	TGFB2-AS1
chr1	218690055	218690388	334	*	997	ENSG00000228208	218683438	218699320	+	inside	6617	6617	NearestLocation	LINC02869
chr1	218847806	218848204	399	*	998	ENSG00000212610	218715033	218715241	-	upstream	-132565	132565	NearestLocation	NA
chr1	218866188	218866646	459	*	999	ENSG00000212610	218715033	218715241	-	upstream	-150947	150947	NearestLocation	NA
chr1	218908886	218909280	395	*	1000	ENSG00000226693	219054942	219055992	-	downstream	147106	145662	NearestLocation	NA
chr1	218948848	218949530	683	*	1001	ENSG00000226693	219054942	219055992	-	downstream	107144	105412	NearestLocation	NA
chr1	218983049	218983355	307	*	1002	ENSG00000226693	219054942	219055992	-	downstream	72943	71587	NearestLocation	NA
chr1	219710481	219710733	253	*	1003	ENSG00000238232	219730534	219731043	+	upstream	-20053	19801	NearestLocation	NA
chr1	219761654	219761919	266	*	1004	ENSG00000215817	219782859	219786462	-	downstream	24808	20940	NearestLocation	ZC3H11B
chr1	219792038	219792237	200	*	1005	ENSG00000215817	219782859	219786462	-	upstream	-5576	5576	NearestLocation	ZC3H11B
chr1	219921687	219921947	261	*	1006	ENSG00000252086	219935131	219935217	+	upstream	-13444	13184	NearestLocation	RNA5SP76
chr1	219931425	219931626	202	*	1007	ENSG00000252086	219935131	219935217	+	upstream	-3706	3505	NearestLocation	RNA5SP76
chr1	220138587	220138883	297	*	1008	ENSG00000221673	220136028	220136206	+	downstream	2559	2381	NearestLocation	NA
chr1	220262997	220263367	371	*	1009	ENSG00000162813	220230824	220263804	-	inside	807	437	NearestLocation	BPNT1
chr1	220557601	220557850	250	*	1010	ENSG00000260505	220574464	220577375	+	upstream	-16863	16614	NearestLocation	NA
chr1	221139862	221140506	645	*	1011	ENSG00000257551	221006105	221053482	-	upstream	-86380	86380	NearestLocation	HLX-AS1
chr1	221603750	221603961	212	*	1012	ENSG00000232436	221681901	221684321	+	upstream	-78151	77940	NearestLocation	NA
chr1	221685184	221685524	341	*	1013	ENSG00000232436	221681901	221684321	+	downstream	3283	863	NearestLocation	NA
chr1	221861070	221861364	295	*	1014	ENSG00000143507	221874766	221915518	-	downstream	54448	13402	NearestLocation	DUSP10
chr1	221919577	221919835	259	*	1015	ENSG00000143507	221874766	221915518	-	upstream	-4059	4059	NearestLocation	DUSP10
chr1	222204697	222204896	200	*	1016	ENSG00000212094	222186349	222186432	-	upstream	-18265	18265	NearestLocation	NA
chr1	222211207	222211443	237	*	1017	ENSG00000212094	222186349	222186432	-	upstream	-24775	24775	NearestLocation	NA
chr1	222807801	222808076	276	*	1018	ENSG00000229399	222814756	222815200	-	downstream	7399	6680	NearestLocation	NA
chr1	223442479	223442709	231	*	1019	ENSG00000226601	223354486	223361496	+	downstream	87993	80983	NearestLocation	NA
chr1	223976689	223976972	284	*	1020	ENSG00000143514	223967601	224033674	-	inside	56985	9088	NearestLocation	TP53BP2
chr1	224121369	224121572	204	*	1021	ENSG00000233771	224135307	224138118	+	upstream	-13938	13735	NearestLocation	NA
chr1	224126835	224127040	206	*	1022	ENSG00000233771	224135307	224138118	+	upstream	-8472	8267	NearestLocation	NA
chr1	224249153	224249385	233	*	1023	ENSG00000229930	224218406	224222758	-	upstream	-26395	26395	NearestLocation	NA
chr1	224401313	224401587	275	*	1024	ENSG00000232628	224396449	224400981	-	upstream	-332	332	NearestLocation	LOC101927143
chr1	224517947	224518380	434	*	1025	ENSG00000143748	224415036	224518089	-	overlapStart	142	142	NearestLocation	NVL
chr1	224872695	224872973	279	*	1026	ENSG00000234247	224848875	224849588	-	upstream	-23107	23107	NearestLocation	NA
chr1	225314834	225315144	311	*	1027	ENSG00000185842	225083964	225586996	+	inside	230870	230870	NearestLocation	DNAH14
chr1	225737696	225737908	213	*	1028	ENSG00000234476	225634945	225653045	-	upstream	-84651	84651	NearestLocation	NA
chr1	225755574	225755811	238	*	1029	ENSG00000154380	225674537	225840844	-	inside	85270	81037	NearestLocation	ENAH
chr1	225815008	225815538	531	*	1030	ENSG00000154380	225674537	225840844	-	inside	25836	25306	NearestLocation	ENAH
chr1	225881883	225882191	309	*	1031	ENSG00000227496	225888306	225939945	+	upstream	-6423	6115	NearestLocation	NA
chr1	225942628	225943110	483	*	1032	ENSG00000223306	225928977	225929084	+	downstream	13651	13544	NearestLocation	RNU6-1304P
chr1	226187150	226187547	398	*	1033	ENSG00000143751	226170403	226187032	-	upstream	-118	118	NearestLocation	SDE2
chr1	226552236	226552571	336	*	1034	ENSG00000143799	226548392	226595780	-	inside	43544	3844	NearestLocation	PARP1
chr1	226720324	226720603	280	*	1035	ENSG00000203685	226736501	226796915	+	upstream	-16177	15898	NearestLocation	STUM
chr1	227173493	227173707	215	*	1036	ENSG00000233706	227179841	227180907	+	upstream	-6348	6134	NearestLocation	NA
chr1	228273085	228273426	342	*	1037	ENSG00000143761	228270361	228286912	+	inside	2724	2724	NearestLocation	ARF1
chr1	228556816	228557182	367	*	1038	ENSG00000270104	228571815	228572717	-	downstream	15901	14633	NearestLocation	NA
chr1	228674804	228675011	208	*	1039	ENSG00000168159	228674762	228683467	+	inside	42	42	NearestLocation	RNF187
chr1	228757990	228758246	257	*	1040	ENSG00000200624	228757194	228757312	-	upstream	-678	678	NearestLocation	RNA5S6
chr1	228820965	228821199	235	*	1041	ENSG00000234975	228823162	228823574	+	upstream	-2197	1963	NearestLocation	FTH1P2
chr1	228916935	228917384	450	*	1042	ENSG00000271475	228912059	228912612	+	downstream	4876	4323	NearestLocation	LOC100421842
chr1	229283942	229284307	366	*	1043	ENSG00000236975	229228562	229230652	-	upstream	-53290	53290	NearestLocation	NA
chr1	230106368	230106801	434	*	1044	ENSG00000228058	230138477	230142909	+	upstream	-32109	31676	NearestLocation	LINC01736
chr1	230204096	230204354	259	*	1045	ENSG00000143641	230193536	230417870	+	inside	10560	10560	NearestLocation	GALNT2
chr1	230353562	230353776	215	*	1046	ENSG00000227006	230394440	230404229	-	downstream	50667	40664	NearestLocation	NA
chr1	230399202	230399708	507	*	1047	ENSG00000227006	230394440	230404229	-	inside	5027	4521	NearestLocation	NA
chr1	230894546	230894785	240	*	1048	ENSG00000135773	230883130	230937749	+	inside	11416	11416	NearestLocation	CAPN9
chr1	230896114	230896364	251	*	1049	ENSG00000135773	230883130	230937749	+	inside	12984	12984	NearestLocation	CAPN9
chr1	230987263	230987497	235	*	1050	ENSG00000119280	230972865	231005335	-	inside	18072	14398	NearestLocation	C1orf198
chr1	231173840	231174083	244	*	1051	ENSG00000182118	231154704	231175992	-	inside	2152	1909	NearestLocation	FAM89A
chr1	231201459	231201913	455	*	1052	ENSG00000182118	231154704	231175992	-	upstream	-25467	25467	NearestLocation	FAM89A
chr1	231529496	231529768	273	*	1053	ENSG00000135766	231499497	231560790	-	inside	31294	29999	NearestLocation	EGLN1
chr1	231686276	231686487	212	*	1054	ENSG00000116918	231664399	231702270	+	inside	21877	15783	NearestLocation	TSNAX
chr1	231953952	231954303	352	*	1055	ENSG00000226758	232061580	232080979	+	upstream	-107628	107277	NearestLocation	DISC1-IT1
chr1	231957101	231957314	214	*	1056	ENSG00000226758	232061580	232080979	+	upstream	-104479	104266	NearestLocation	DISC1-IT1
chr1	231983445	231983789	345	*	1057	ENSG00000226758	232061580	232080979	+	upstream	-78135	77791	NearestLocation	DISC1-IT1
chr1	232464333	232464749	417	*	1058	ENSG00000242794	232358612	232358891	+	downstream	105721	105442	NearestLocation	RN7SL299P
chr1	232691647	232692434	788	*	1059	ENSG00000116991	232533711	232697304	-	inside	5657	4870	NearestLocation	SIPA1L2
chr1	232725699	232725898	200	*	1060	ENSG00000116991	232533711	232697304	-	upstream	-28395	28395	NearestLocation	SIPA1L2
chr1	232756186	232756425	240	*	1061	ENSG00000116991	232533711	232697304	-	upstream	-58882	58882	NearestLocation	SIPA1L2
chr1	232771610	232771822	213	*	1062	ENSG00000238382	232835950	232836054	+	upstream	-64340	64128	NearestLocation	RNU6-1211P
chr1	232784058	232784323	266	*	1063	ENSG00000238382	232835950	232836054	+	upstream	-51892	51627	NearestLocation	RNU6-1211P
chr1	232811277	232811494	218	*	1064	ENSG00000238382	232835950	232836054	+	upstream	-24673	24456	NearestLocation	RNU6-1211P
chr1	232995775	232996014	240	*	1065	ENSG00000206835	232967763	232967933	-	upstream	-27842	27842	NearestLocation	RNU1-74P
chr1	233170696	233170910	215	*	1066	ENSG00000135778	233086351	233119628	+	downstream	84345	51068	NearestLocation	NTPCR
chr1	233926877	233927175	299	*	1067	ENSG00000225486	233971826	233972178	-	downstream	45301	44651	NearestLocation	NA
chr1	234290516	234290736	221	*	1068	ENSG00000233332	234348352	234350834	-	downstream	60318	57616	NearestLocation	NA
chr1	234509022	234509323	302	*	1069	ENSG00000168275	234509202	234519795	+	overlapStart	-180	121	NearestLocation	COA6
chr1	234509521	234509785	265	*	1070	ENSG00000231663	234508553	234509339	-	upstream	-182	182	NearestLocation	COA6-AS1
chr1	234626898	234627174	277	*	1071	ENSG00000059588	234527059	234614849	-	upstream	-12049	12049	NearestLocation	TARBP1
chr1	234689322	234689521	200	*	1072	ENSG00000230404	234701044	234705834	+	upstream	-11722	11523	NearestLocation	NA
chr1	234709683	234709933	251	*	1073	ENSG00000230404	234701044	234705834	+	downstream	8639	3849	NearestLocation	NA
chr1	234737439	234737638	200	*	1074	ENSG00000228830	234742754	234745229	+	upstream	-5315	5116	NearestLocation	NA
chr1	234859700	234859946	247	*	1075	ENSG00000227630	234859789	234867390	+	overlapStart	-89	89	NearestLocation	LINC01132
chr1	234866485	234866724	240	*	1076	ENSG00000227630	234859789	234867390	+	inside	6696	666	NearestLocation	LINC01132
chr1	235015332	235015533	202	*	1077	ENSG00000239690	235039933	235040233	+	upstream	-24601	24400	NearestLocation	RN7SL668P
chr1	235676931	235677146	216	*	1078	ENSG00000238236	235683269	235683983	+	upstream	-6338	6123	NearestLocation	MTCYBP14
chr1	236102616	236102815	200	*	1079	ENSG00000237845	236105853	236107105	-	downstream	4489	3038	NearestLocation	NA
chr1	236267126	236267329	204	*	1080	ENSG00000235371	236273361	236275670	+	upstream	-6235	6032	NearestLocation	NA
chr1	236696228	236696443	216	*	1081	ENSG00000273058	236699473	236700004	-	downstream	3776	3030	NearestLocation	NA
chr1	236862743	236863002	260	*	1082	ENSG00000077522	236849754	236927931	+	inside	12989	12989	NearestLocation	ACTN2
chr1	236876968	236877366	399	*	1083	ENSG00000077522	236849754	236927931	+	inside	27214	27214	NearestLocation	ACTN2
chr1	236877821	236878354	534	*	1084	ENSG00000077522	236849754	236927931	+	inside	28067	28067	NearestLocation	ACTN2
chr1	236917414	236917649	236	*	1085	ENSG00000116984	236958610	237067281	+	upstream	-41196	40961	NearestLocation	MTR
chr1	237054016	237054321	306	*	1086	ENSG00000226498	236982934	236983818	+	downstream	71082	70198	NearestLocation	RPSAP21
chr1	237070611	237070848	238	*	1087	ENSG00000237991	237144637	237145008	+	upstream	-74026	73789	NearestLocation	RPL35P1
chr1	237207570	237207876	307	*	1088	ENSG00000198626	237205505	237997288	+	inside	2065	2065	NearestLocation	RYR2
chr1	237309572	237309894	323	*	1089	ENSG00000252396	237284107	237284409	+	downstream	25465	25163	NearestLocation	RN7SKP195
chr1	237413488	237414069	582	*	1090	ENSG00000252396	237284107	237284409	+	downstream	129381	129079	NearestLocation	RN7SKP195
chr1	237547608	237547910	303	*	1091	ENSG00000266262	237634419	237634491	+	upstream	-86811	86509	NearestLocation	MIR4428
chr1	238064691	238064903	213	*	1092	ENSG00000116996	238045705	238054094	-	upstream	-10597	10597	NearestLocation	ZP4
chr1	238822100	238822332	233	*	1093	ENSG00000224783	238940349	238942500	-	downstream	120400	118017	NearestLocation	NA
chr1	238835560	238835885	326	*	1094	ENSG00000224783	238940349	238942500	-	downstream	106940	104464	NearestLocation	NA
chr1	238838117	238838318	202	*	1095	ENSG00000224783	238940349	238942500	-	downstream	104383	102031	NearestLocation	NA
chr1	239146122	239146355	234	*	1096	ENSG00000227854	239216048	239216203	-	downstream	70081	69693	NearestLocation	NA
chr1	239263680	239263915	236	*	1097	ENSG00000227854	239216048	239216203	-	upstream	-47477	47477	NearestLocation	NA
chr1	240333987	240334415	429	*	1098	ENSG00000223694	240333455	240334591	+	inside	532	176	NearestLocation	ADH5P3
chr1	240363305	240363536	232	*	1099	ENSG00000233735	240341139	240342944	-	upstream	-20361	20361	NearestLocation	NA
chr1	240363652	240363941	290	*	1100	ENSG00000233735	240341139	240342944	-	upstream	-20708	20708	NearestLocation	NA
chr1	240400593	240400801	209	*	1101	ENSG00000233735	240341139	240342944	-	upstream	-57649	57649	NearestLocation	NA
chr1	241280735	241281073	339	*	1102	ENSG00000265831	241295572	241295646	+	upstream	-14837	14499	NearestLocation	MIR3123
chr1	241773514	241773741	228	*	1103	ENSG00000203668	241792155	241799232	-	downstream	25718	18414	NearestLocation	CHML;OPN3
chr1	242196593	242196972	380	*	1104	ENSG00000223119	242187251	242187356	-	upstream	-9237	9237	NearestLocation	NA
chr1	242833367	242833592	226	*	1105	ENSG00000270859	242834442	242834878	+	upstream	-1075	850	NearestLocation	NA
chr1	243040643	243040851	209	*	1106	ENSG00000270818	243045368	243046777	-	downstream	6134	4517	NearestLocation	LOC100129949
chr1	244253007	244253219	213	*	1107	ENSG00000229960	244232122	244256328	-	inside	3321	3109	NearestLocation	NA
chr1	244439120	244439463	344	*	1108	ENSG00000173728	244515937	244552965	+	upstream	-76817	76474	NearestLocation	C1orf100
chr1	244533604	244533938	335	*	1109	ENSG00000173728	244515937	244552965	+	inside	17667	17667	NearestLocation	C1orf100
chr1	244655413	244655618	206	*	1110	ENSG00000179397	244617679	244804479	+	inside	37734	37734	NearestLocation	CATSPERE
chr1	244984498	244984699	202	*	1111	ENSG00000203667	244998624	245008359	+	upstream	-14126	13925	NearestLocation	COX20
chr1	245206226	245206425	200	*	1112	ENSG00000251754	245207230	245207334	+	upstream	-1004	805	NearestLocation	RNU6-999P
chr1	245215146	245215452	307	*	1113	ENSG00000251754	245207230	245207334	+	downstream	7916	7812	NearestLocation	RNU6-999P
chr1	245316473	245316672	200	*	1114	ENSG00000162849	245318287	245872733	+	upstream	-1814	1615	NearestLocation	KIF26B
chr1	245454201	245454505	305	*	1115	ENSG00000232793	245446133	245446391	-	upstream	-7810	7810	NearestLocation	NA
chr1	245491175	245491466	292	*	1116	ENSG00000221165	245533636	245533721	+	upstream	-42461	42170	NearestLocation	NA
chr1	245501066	245501402	337	*	1117	ENSG00000221165	245533636	245533721	+	upstream	-32570	32234	NearestLocation	NA
chr1	245585770	245586030	261	*	1118	ENSG00000221165	245533636	245533721	+	downstream	52134	52049	NearestLocation	NA
chr1	245817854	245818363	510	*	1119	ENSG00000231612	245837034	245839780	-	downstream	21926	18671	NearestLocation	NA
chr1	245954756	245955379	624	*	1120	ENSG00000231612	245837034	245839780	-	upstream	-114976	114976	NearestLocation	NA
chr1	246154570	246154833	264	*	1121	ENSG00000235096	246196853	246198905	+	upstream	-42283	42020	NearestLocation	NA
chr1	246166491	246166771	281	*	1122	ENSG00000235096	246196853	246198905	+	upstream	-30362	30082	NearestLocation	NA
chr1	246195491	246195734	244	*	1123	ENSG00000235096	246196853	246198905	+	upstream	-1362	1119	NearestLocation	NA
chr1	246598872	246599177	306	*	1124	ENSG00000207326	246589308	246589421	-	upstream	-9451	9451	NearestLocation	NA
chr1	246608086	246608367	282	*	1125	ENSG00000207326	246589308	246589421	-	upstream	-18665	18665	NearestLocation	NA
chr1	246648162	246648361	200	*	1126	ENSG00000185420	245912642	246670614	-	inside	22452	22253	NearestLocation	SMYD3
chr1	246660647	246660977	331	*	1127	ENSG00000185420	245912642	246670614	-	inside	9967	9637	NearestLocation	SMYD3
chr1	247267664	247267912	249	*	1128	ENSG00000188295	247263264	247267674	-	overlapStart	10	10	NearestLocation	ZNF669
chr1	247290842	247291118	277	*	1129	ENSG00000226164	247282971	247283580	+	downstream	7871	7262	NearestLocation	FGFR3P6
chr1	247333894	247334162	269	*	1130	ENSG00000196418	247285277	247335318	-	inside	1424	1156	NearestLocation	ZNF124
chr1	247456342	247456608	267	*	1131	ENSG00000202079	247458137	247458243	+	upstream	-1795	1529	NearestLocation	NA
chr1	248330689	248330888	200	*	1132	ENSG00000198601	248343288	248344331	+	upstream	-12599	12400	NearestLocation	OR2M2
chr1	248333756	248333965	210	*	1133	ENSG00000198601	248343288	248344331	+	upstream	-9532	9323	NearestLocation	OR2M2
chr1	249058539	249058818	280	*	1134	ENSG00000229663	249065834	249067991	-	downstream	9452	7016	NearestLocation	DPY19L4P1
chr1	249167436	249167742	307	*	1135	ENSG00000227237	249153363	249158995	+	downstream	14073	8441	NearestLocation	NA
chr10	711680	711879	200	*	1136	ENSG00000242357	709498	712562	+	inside	2182	683	NearestLocation	NA
chr10	872560	872787	228	*	1137	ENSG00000231601	789932	790898	+	downstream	82628	81662	NearestLocation	NA
chr10	1195844	1196151	308	*	1138	ENSG00000229205	1205708	1210612	+	upstream	-9864	9557	NearestLocation	LINC00200
chr10	1282956	1283164	209	*	1139	ENSG00000229205	1205708	1210612	+	downstream	77248	72344	NearestLocation	LINC00200
chr10	1314388	1314616	229	*	1140	ENSG00000233052	1403196	1403832	-	downstream	89444	88580	NearestLocation	NA
chr10	1601244	1601775	532	*	1141	ENSG00000205696	1568832	1599179	+	downstream	32412	2065	NearestLocation	ADARB2-AS1
chr10	1655185	1655384	200	*	1142	ENSG00000205696	1568832	1599179	+	downstream	86353	56006	NearestLocation	ADARB2-AS1
chr10	2675826	2676200	375	*	1143	ENSG00000235281	2543975	2609431	+	downstream	131851	66395	NearestLocation	NA
chr10	2776917	2777298	382	*	1144	ENSG00000231743	2978213	2978633	+	upstream	-201296	200915	NearestLocation	NA
chr10	3103817	3104073	257	*	1145	ENSG00000273001	3107616	3108193	-	downstream	4376	3543	NearestLocation	NA
chr10	3136974	3137276	303	*	1146	ENSG00000067057	3108525	3179904	+	inside	28449	28449	NearestLocation	PFKP
chr10	3141838	3142037	200	*	1147	ENSG00000067057	3108525	3179904	+	inside	33313	33313	NearestLocation	PFKP
chr10	3542665	3542864	200	*	1148	ENSG00000233321	3529086	3545030	-	inside	2365	2166	NearestLocation	LINC02669
chr10	3616767	3616970	204	*	1149	ENSG00000236892	3574286	3579223	-	upstream	-37544	37544	NearestLocation	NA
chr10	3620521	3620745	225	*	1150	ENSG00000236892	3574286	3579223	-	upstream	-41298	41298	NearestLocation	NA
chr10	3797784	3798254	471	*	1151	ENSG00000229672	3793259	3805418	+	inside	4525	4525	NearestLocation	NA
chr10	3880063	3880362	300	*	1152	ENSG00000230573	3876142	3876920	+	downstream	3921	3143	NearestLocation	LINC02639
chr10	4125573	4125964	392	*	1153	ENSG00000236990	4093918	4131205	+	inside	31655	5241	NearestLocation	LOC101927964
chr10	4495544	4495799	256	*	1154	ENSG00000230096	4457497	4468371	-	upstream	-27173	27173	NearestLocation	NA
chr10	4704208	4704407	200	*	1155	ENSG00000225269	4697619	4704611	+	inside	6589	204	NearestLocation	LINC00705
chr10	4864486	4864802	317	*	1156	ENSG00000165568	4828821	4890254	+	inside	35665	25452	NearestLocation	AKR1E2
chr10	4891975	4892174	200	*	1157	ENSG00000151631	4914093	4934167	-	downstream	42192	21919	NearestLocation	NA
chr10	4909753	4910234	482	*	1158	ENSG00000151631	4914093	4934167	-	downstream	24414	3859	NearestLocation	NA
chr10	4945546	4945828	283	*	1159	ENSG00000187134	4934796	5025475	+	inside	10750	10750	NearestLocation	AKR1C1
chr10	5590788	5591000	213	*	1160	ENSG00000205488	5556207	5568209	-	upstream	-22579	22579	NearestLocation	NA
chr10	5875756	5876035	280	*	1161	ENSG00000057608	5807186	5884095	-	inside	8339	8060	NearestLocation	GDI2
chr10	6056230	6056451	222	*	1162	ENSG00000251922	6059017	6059157	-	downstream	2927	2566	NearestLocation	NA
chr10	6206772	6207183	412	*	1163	ENSG00000263628	6194159	6194240	+	downstream	12613	12532	NearestLocation	MIR3155A
chr10	6255906	6256137	232	*	1164	ENSG00000213994	6239575	6244656	-	upstream	-11250	11250	NearestLocation	NA
chr10	6320842	6321108	267	*	1165	ENSG00000215244	6319650	6377944	+	inside	1192	1192	NearestLocation	LINC02649
chr10	6406865	6407153	289	*	1166	ENSG00000212743	6392278	6394723	+	downstream	14587	12142	NearestLocation	NA
chr10	6435990	6436298	309	*	1167	ENSG00000212743	6392278	6394723	+	downstream	43712	41267	NearestLocation	NA
chr10	6458979	6459184	206	*	1168	ENSG00000212743	6392278	6394723	+	downstream	66701	64256	NearestLocation	NA
chr10	7306228	7306447	220	*	1169	ENSG00000235141	7337068	7337252	-	downstream	31024	30621	NearestLocation	NA
chr10	7414705	7414909	205	*	1170	ENSG00000198879	7200586	7453450	-	inside	38745	38541	NearestLocation	SFMBT2
chr10	7567328	7567575	248	*	1171	ENSG00000230121	7575169	7578527	+	upstream	-7841	7594	NearestLocation	NA
chr10	7714777	7715107	331	*	1172	ENSG00000123243	7601232	7708961	-	upstream	-5816	5816	NearestLocation	ITIH5
chr10	7831515	7831743	229	*	1173	ENSG00000165629	7830092	7849778	+	inside	1423	1423	NearestLocation	ATP5F1C
chr10	7837612	7837892	281	*	1174	ENSG00000165629	7830092	7849778	+	inside	7520	7520	NearestLocation	ATP5F1C
chr10	8024955	8025229	275	*	1175	ENSG00000232638	8093504	8095047	+	upstream	-68549	68275	NearestLocation	NA
chr10	8099726	8099974	249	*	1176	ENSG00000107485	8095567	8117161	+	inside	4159	4159	NearestLocation	GATA3
chr10	8158938	8159279	342	*	1177	ENSG00000225053	8203223	8204155	+	upstream	-44285	43944	NearestLocation	NA
chr10	8173803	8174037	235	*	1178	ENSG00000225053	8203223	8204155	+	upstream	-29420	29186	NearestLocation	NA
chr10	8276124	8276368	245	*	1179	ENSG00000232170	8301294	8310268	-	downstream	34144	24926	NearestLocation	LINC00708
chr10	8353224	8353506	283	*	1180	ENSG00000226861	8340860	8343630	+	downstream	12364	9594	NearestLocation	NA
chr10	8781068	8781267	200	*	1181	ENSG00000270234	8765973	8766251	+	downstream	15095	14817	NearestLocation	NA
chr10	9179100	9179544	445	*	1182	ENSG00000230014	9317796	9329020	+	upstream	-138696	138252	NearestLocation	NA
chr10	9381712	9382015	304	*	1183	ENSG00000230014	9317796	9329020	+	downstream	63916	52692	NearestLocation	NA
chr10	9867414	9867701	288	*	1184	ENSG00000228636	9800746	9801200	-	upstream	-66214	66214	NearestLocation	NA
chr10	10394852	10395051	200	*	1185	ENSG00000234306	10407143	10408450	-	downstream	13598	12092	NearestLocation	NA
chr10	10929199	10929417	219	*	1186	ENSG00000229240	10969021	10994197	-	downstream	64998	39604	NearestLocation	LINC00710
chr10	10953358	10953613	256	*	1187	ENSG00000229240	10969021	10994197	-	downstream	40839	15408	NearestLocation	LINC00710
chr10	11078378	11078596	219	*	1188	ENSG00000229206	11072297	11072831	+	downstream	6081	5547	NearestLocation	NA
chr10	11220488	11221018	531	*	1189	ENSG00000230322	11210885	11213339	-	upstream	-7149	7149	NearestLocation	NA
chr10	11312636	11312835	200	*	1190	ENSG00000181800	11358797	11361847	-	downstream	49211	45962	NearestLocation	CELF2-AS1
chr10	11377206	11377419	214	*	1191	ENSG00000181800	11358797	11361847	-	upstream	-15359	15359	NearestLocation	CELF2-AS1
chr10	11824887	11825117	231	*	1192	ENSG00000148426	11865338	11914276	+	upstream	-40451	40221	NearestLocation	PROSER2
chr10	11916878	11917232	355	*	1193	ENSG00000225778	11891612	11936699	-	inside	19821	19467	NearestLocation	PROSER2-AS1
chr10	11955451	11955664	214	*	1194	ENSG00000251957	11965180	11965287	+	upstream	-9729	9516	NearestLocation	RNU6-1095P
chr10	12030741	12030953	213	*	1195	ENSG00000151461	11962021	12085169	-	inside	54428	54216	NearestLocation	UPF2
chr10	12105491	12105690	200	*	1196	ENSG00000181192	12110971	12165224	+	upstream	-5480	5281	NearestLocation	DHTKD1
chr10	12277139	12277456	318	*	1197	ENSG00000228302	12286750	12289844	-	downstream	12705	9294	NearestLocation	NA
chr10	12691123	12691336	214	*	1198	ENSG00000263584	12620752	12620822	+	downstream	70371	70301	NearestLocation	MIR4480
chr10	12792903	12793212	310	*	1199	ENSG00000221331	12767253	12767352	-	upstream	-25551	25551	NearestLocation	MIR548Q
chr10	12817902	12818106	205	*	1200	ENSG00000221331	12767253	12767352	-	upstream	-50550	50550	NearestLocation	MIR548Q
chr10	13020973	13021224	252	*	1201	ENSG00000212499	12966679	12966785	-	upstream	-54188	54188	NearestLocation	RNA5SP300
chr10	13310899	13311135	237	*	1202	ENSG00000107537	13319796	13344412	-	downstream	33513	8661	NearestLocation	PHYH
chr10	13972227	13972569	343	*	1203	ENSG00000215227	13912797	13913175	+	downstream	59430	59052	NearestLocation	NUTF2P5
chr10	14013903	14014189	287	*	1204	ENSG00000229751	14033815	14049525	+	upstream	-19912	19626	NearestLocation	NA
chr10	14062213	14062458	246	*	1205	ENSG00000229751	14033815	14049525	+	downstream	28398	12688	NearestLocation	NA
chr10	15148426	15148685	260	*	1206	ENSG00000176236	15137384	15139318	-	upstream	-9108	9108	NearestLocation	RPP38-DT
chr10	15303380	15303615	236	*	1207	ENSG00000232739	15279491	15283766	+	downstream	23889	19614	NearestLocation	NA
chr10	15355910	15356197	288	*	1208	ENSG00000148468	15253642	15413061	-	inside	57151	56864	NearestLocation	FAM171A1
chr10	15481554	15481863	310	*	1209	ENSG00000148468	15253642	15413061	-	upstream	-68493	68493	NearestLocation	FAM171A1
chr10	15528504	15528723	220	*	1210	ENSG00000148468	15253642	15413061	-	upstream	-115443	115443	NearestLocation	FAM171A1
chr10	15709774	15709974	201	*	1211	ENSG00000077943	15555948	15762124	-	inside	52350	52150	NearestLocation	ITGA8
chr10	15762102	15762385	284	*	1212	ENSG00000077943	15555948	15762124	-	overlapStart	22	22	NearestLocation	ITGA8
chr10	15767699	15767914	216	*	1213	ENSG00000077943	15555948	15762124	-	upstream	-5575	5575	NearestLocation	ITGA8
chr10	15859709	15860017	309	*	1214	ENSG00000148481	15820169	15902519	-	inside	42810	39540	NearestLocation	MINDY3
chr10	16417110	16417349	240	*	1215	ENSG00000238552	16440654	16440758	-	downstream	23648	23305	NearestLocation	NA
chr10	16534005	16534261	257	*	1216	ENSG00000223156	16518002	16518163	+	downstream	16003	15842	NearestLocation	RNU2-18P
chr10	16587407	16587667	261	*	1217	ENSG00000165985	16555742	16564004	-	upstream	-23403	23403	NearestLocation	C1QL3
chr10	16819544	16819743	200	*	1218	ENSG00000225213	16763351	16790376	-	upstream	-29168	29168	NearestLocation	NA
chr10	16951260	16951509	250	*	1219	ENSG00000148484	16632610	16859527	-	upstream	-91733	91733	NearestLocation	RSU1
chr10	17291027	17291329	303	*	1220	ENSG00000234961	17275324	17276832	-	upstream	-14195	14195	NearestLocation	NA
chr10	17879026	17879325	300	*	1221	ENSG00000207937	17887107	17887193	+	upstream	-8081	7782	NearestLocation	NA
chr10	18479661	18479951	291	*	1222	ENSG00000165995	18429606	18830798	+	inside	50055	50055	NearestLocation	CACNB2
chr10	18601631	18601927	297	*	1223	ENSG00000235020	18523097	18550123	-	upstream	-51508	51508	NearestLocation	NA
chr10	18641168	18641436	269	*	1224	ENSG00000235020	18523097	18550123	-	upstream	-91045	91045	NearestLocation	NA
chr10	18744150	18744781	632	*	1225	ENSG00000225527	18820778	18822265	-	downstream	78115	75997	NearestLocation	NA
chr10	18762452	18762773	322	*	1226	ENSG00000225527	18820778	18822265	-	downstream	59813	58005	NearestLocation	NA
chr10	18940378	18940642	265	*	1227	ENSG00000241058	18834490	18940551	-	overlapStart	173	91	NearestLocation	NSUN6
chr10	19364164	19364616	453	*	1228	ENSG00000226255	19340384	19341099	+	downstream	23780	23065	NearestLocation	UBE2V2P1
chr10	19388116	19388428	313	*	1229	ENSG00000226255	19340384	19341099	+	downstream	47732	47017	NearestLocation	UBE2V2P1
chr10	19711825	19712024	200	*	1230	ENSG00000239539	19778030	19778329	+	upstream	-66205	66006	NearestLocation	NA
chr10	20056816	20057084	269	*	1231	ENSG00000212072	20072486	20072589	-	downstream	15773	15402	NearestLocation	NA
chr10	20560185	20560653	469	*	1232	ENSG00000228339	20638978	20640029	+	upstream	-78793	78325	NearestLocation	AMD1P1
chr10	20707236	20707455	220	*	1233	ENSG00000228339	20638978	20640029	+	downstream	68258	67207	NearestLocation	AMD1P1
chr10	20781469	20781778	310	*	1234	ENSG00000270727	20836100	20836351	+	upstream	-54631	54322	NearestLocation	NA
chr10	21180323	21180604	282	*	1235	ENSG00000230112	21130304	21130489	+	downstream	50019	49834	NearestLocation	NA
chr10	21186196	21186717	522	*	1236	ENSG00000230112	21130304	21130489	+	downstream	55892	55707	NearestLocation	NA
chr10	21244438	21244709	272	*	1237	ENSG00000228753	21317928	21319721	+	upstream	-73490	73219	NearestLocation	EIF4BP2
chr10	21266175	21266375	201	*	1238	ENSG00000228753	21317928	21319721	+	upstream	-51753	51553	NearestLocation	EIF4BP2
chr10	21333603	21333802	200	*	1239	ENSG00000228753	21317928	21319721	+	downstream	15675	13882	NearestLocation	EIF4BP2
chr10	21366635	21367019	385	*	1240	ENSG00000228219	21399611	21402317	+	upstream	-32976	32592	NearestLocation	NPM1P30
chr10	21611489	21611688	200	*	1241	ENSG00000207264	21610890	21610996	+	downstream	599	493	NearestLocation	RNU6-15P
chr10	22215983	22216264	282	*	1242	ENSG00000201364	22222072	22222367	+	upstream	-6089	5808	NearestLocation	RN7SKP37
chr10	22906826	22907584	759	*	1243	ENSG00000150867	22823778	23003484	-	inside	96658	83048	NearestLocation	PIP4K2A
chr10	22936324	22936591	268	*	1244	ENSG00000150867	22823778	23003484	-	inside	67160	66893	NearestLocation	PIP4K2A
chr10	22946051	22946330	280	*	1245	ENSG00000150867	22823778	23003484	-	inside	57433	57154	NearestLocation	PIP4K2A
chr10	24269092	24269329	238	*	1246	ENSG00000223928	24446764	24447710	+	upstream	-177672	177435	NearestLocation	NA
chr10	24403676	24403913	238	*	1247	ENSG00000223928	24446764	24447710	+	upstream	-43088	42851	NearestLocation	NA
chr10	24545201	24545550	350	*	1248	ENSG00000207930	24564614	24564710	+	upstream	-19413	19064	NearestLocation	MIR603
chr10	24754019	24754253	235	*	1249	ENSG00000269879	24770273	24770632	-	downstream	16613	16020	NearestLocation	NA
chr10	25782105	25782497	393	*	1250	ENSG00000222543	25682486	25682773	-	upstream	-99332	99332	NearestLocation	RN7SKP220
chr10	26046871	26047181	311	*	1251	ENSG00000223019	26102740	26102846	-	downstream	55975	55559	NearestLocation	RNA5SP306
chr10	26055701	26056096	396	*	1252	ENSG00000223019	26102740	26102846	-	downstream	47145	46644	NearestLocation	RNA5SP306
chr10	26511555	26511879	325	*	1253	ENSG00000136750	26505236	26593487	+	inside	6319	6319	NearestLocation	GAD2
chr10	26666220	26666679	460	*	1254	ENSG00000077420	26727132	26856732	+	upstream	-60912	60453	NearestLocation	APBB1IP
chr10	26805710	26805963	254	*	1255	ENSG00000199733	26798518	26798633	+	downstream	7192	7077	NearestLocation	RNA5SP307
chr10	26813542	26813790	249	*	1256	ENSG00000199733	26798518	26798633	+	downstream	15024	14909	NearestLocation	RNA5SP307
chr10	27068270	27068502	233	*	1257	ENSG00000223027	27077946	27078086	+	upstream	-9676	9444	NearestLocation	NA
chr10	28601732	28601960	229	*	1258	ENSG00000222374	28599782	28599888	+	downstream	1950	1844	NearestLocation	NA
chr10	28785444	28785644	201	*	1259	ENSG00000237128	28721937	28784742	-	upstream	-702	702	NearestLocation	LINC02652
chr10	28848453	28848914	462	*	1260	ENSG00000254635	28811581	28821672	-	upstream	-26781	26781	NearestLocation	NA
chr10	28971084	28971435	352	*	1261	ENSG00000095739	28966271	28971868	+	inside	4813	433	NearestLocation	BAMBI
chr10	28976052	28976435	384	*	1262	ENSG00000095739	28966271	28971868	+	downstream	9781	4184	NearestLocation	BAMBI
chr10	29021197	29021444	248	*	1263	ENSG00000236716	29032674	29033592	+	upstream	-11477	11230	NearestLocation	NA
chr10	29096285	29096669	385	*	1264	ENSG00000271220	29095050	29102387	+	inside	1235	1235	NearestLocation	NA
chr10	29111598	29112193	596	*	1265	ENSG00000271220	29095050	29102387	+	downstream	16548	9211	NearestLocation	NA
chr10	29314826	29315168	343	*	1266	ENSG00000229605	29187925	29188422	-	upstream	-126404	126404	NearestLocation	RPL21P93
chr10	29368030	29368326	297	*	1267	ENSG00000229605	29187925	29188422	-	upstream	-179608	179608	NearestLocation	RPL21P93
chr10	29402246	29402555	310	*	1268	ENSG00000120563	29577990	29607257	+	upstream	-175744	175435	NearestLocation	LYZL1
chr10	29520581	29521044	464	*	1269	ENSG00000120563	29577990	29607257	+	upstream	-57409	56946	NearestLocation	LYZL1
chr10	29526803	29527138	336	*	1270	ENSG00000120563	29577990	29607257	+	upstream	-51187	50852	NearestLocation	LYZL1
chr10	29543453	29543827	375	*	1271	ENSG00000120563	29577990	29607257	+	upstream	-34537	34163	NearestLocation	LYZL1
chr10	29607210	29607562	353	*	1272	ENSG00000120563	29577990	29607257	+	overlapEnd	29220	47	NearestLocation	LYZL1
chr10	29646960	29647178	219	*	1273	ENSG00000224597	29698331	29776674	+	upstream	-51371	51153	NearestLocation	SVIL-AS1
chr10	29923783	29923982	200	*	1274	ENSG00000216035	29891193	29891275	-	upstream	-32508	32508	NearestLocation	MIR938
chr10	30014121	30014498	378	*	1275	ENSG00000197321	29746267	30025710	-	inside	11589	11212	NearestLocation	SVIL
chr10	30017627	30017913	287	*	1276	ENSG00000197321	29746267	30025710	-	inside	8083	7797	NearestLocation	SVIL
chr10	30154639	30154934	296	*	1277	ENSG00000237936	30179961	30180396	-	downstream	25757	25027	NearestLocation	NA
chr10	30282364	30282825	462	*	1278	ENSG00000237936	30179961	30180396	-	upstream	-101968	101968	NearestLocation	NA
chr10	30345800	30346031	232	*	1279	ENSG00000165757	30301729	30404423	-	inside	58623	44071	NearestLocation	JCAD
chr10	30359067	30359361	295	*	1280	ENSG00000165757	30301729	30404423	-	inside	45356	45062	NearestLocation	JCAD
chr10	30404496	30404750	255	*	1281	ENSG00000165757	30301729	30404423	-	upstream	-73	73	NearestLocation	JCAD
chr10	30449601	30449890	290	*	1282	ENSG00000165757	30301729	30404423	-	upstream	-45178	45178	NearestLocation	JCAD
chr10	30460644	30460954	311	*	1283	ENSG00000165757	30301729	30404423	-	upstream	-56221	56221	NearestLocation	JCAD
chr10	30894704	30894903	200	*	1284	ENSG00000151033	30900718	30918691	-	downstream	23987	5815	NearestLocation	LYZL2
chr10	30976501	30976888	388	*	1285	ENSG00000234814	30960495	31006195	+	inside	16006	16006	NearestLocation	NA
chr10	31041536	31041829	294	*	1286	ENSG00000230720	31012180	31012669	+	downstream	29356	28867	NearestLocation	LINC02644
chr10	31110220	31110453	234	*	1287	ENSG00000272914	31120757	31122316	-	downstream	12096	10304	NearestLocation	NA
chr10	31441396	31441731	336	*	1288	ENSG00000272381	31476812	31550839	+	upstream	-35416	35081	NearestLocation	NA
chr10	31693569	31693863	295	*	1289	ENSG00000196960	31650356	31688682	-	upstream	-4887	4887	NearestLocation	NA
chr10	32216546	32217082	537	*	1290	ENSG00000165322	32094365	32217742	-	inside	1196	660	NearestLocation	ARHGAP12
chr10	33260618	33260859	242	*	1291	ENSG00000229656	33247773	33371030	+	inside	12845	12845	NearestLocation	NA
chr10	33269686	33270107	422	*	1292	ENSG00000229656	33247773	33371030	+	inside	21913	21913	NearestLocation	NA
chr10	33482595	33482837	243	*	1293	ENSG00000238258	33500205	33502732	+	upstream	-17610	17368	NearestLocation	NA
chr10	33621357	33621677	321	*	1294	ENSG00000099250	33466420	33625190	-	inside	3833	3513	NearestLocation	NRP1
chr10	33787238	33787491	254	*	1295	ENSG00000226412	33867859	33888968	-	downstream	101730	80368	NearestLocation	NA
chr10	33906163	33906520	358	*	1296	ENSG00000226412	33867859	33888968	-	upstream	-17195	17195	NearestLocation	NA
chr10	34123063	34123322	260	*	1297	ENSG00000226407	34153241	34153651	+	upstream	-30178	29919	NearestLocation	RPL23P11
chr10	34917406	34917611	206	*	1298	ENSG00000229235	34952787	34953029	-	downstream	35623	35176	NearestLocation	RPL37P18
chr10	34970957	34971222	266	*	1299	ENSG00000215184	34964563	34964969	-	upstream	-5988	5988	NearestLocation	NA
chr10	35132497	35132745	249	*	1300	ENSG00000226386	35104695	35105314	+	downstream	27802	27183	NearestLocation	PARD3-AS1
chr10	35289917	35290149	233	*	1301	ENSG00000213724	35253997	35255187	+	downstream	35920	34730	NearestLocation	NA
chr10	35429669	35429896	228	*	1302	ENSG00000253054	35424371	35424430	+	downstream	5298	5239	NearestLocation	RNU7-77P
chr10	35442626	35443224	599	*	1303	ENSG00000233343	35447234	35447568	+	upstream	-4608	4010	NearestLocation	ATP6V1G1P4
chr10	35647882	35648227	346	*	1304	ENSG00000271335	35603480	35625329	-	upstream	-22553	22553	NearestLocation	NA
chr10	36011624	36011833	210	*	1305	ENSG00000226646	35986228	35986965	+	downstream	25396	24659	NearestLocation	RPL7P37
chr10	36059866	36060302	437	*	1306	ENSG00000226646	35986228	35986965	+	downstream	73638	72901	NearestLocation	RPL7P37
chr10	36132694	36133086	393	*	1307	ENSG00000227313	36185802	36187891	-	downstream	55197	52716	NearestLocation	NA
chr10	36173921	36174174	254	*	1308	ENSG00000227313	36185802	36187891	-	downstream	13970	11628	NearestLocation	NA
chr10	36275732	36276006	275	*	1309	ENSG00000227313	36185802	36187891	-	upstream	-87841	87841	NearestLocation	NA
chr10	36400658	36400857	200	*	1310	ENSG00000227475	36378014	36378317	-	upstream	-22341	22341	NearestLocation	NA
chr10	36453621	36454096	476	*	1311	ENSG00000227475	36378014	36378317	-	upstream	-75304	75304	NearestLocation	NA
chr10	36644929	36645170	242	*	1312	ENSG00000236626	36721810	36723412	-	downstream	78483	76640	NearestLocation	MTND5P17
chr10	36690550	36690770	221	*	1313	ENSG00000236626	36721810	36723412	-	downstream	32862	31040	NearestLocation	MTND5P17
chr10	36730301	36730780	480	*	1314	ENSG00000237002	36727544	36731320	+	inside	2757	540	NearestLocation	NA
chr10	37010689	37010971	283	*	1315	ENSG00000207271	36914943	36915066	-	upstream	-95623	95623	NearestLocation	NA
chr10	37782410	37782775	366	*	1316	ENSG00000224920	37811939	37833629	+	upstream	-29529	29164	NearestLocation	NA
chr10	38145783	38146120	338	*	1317	ENSG00000236514	38146668	38148038	+	upstream	-885	548	NearestLocation	NA
chr10	42624825	42625105	281	*	1318	ENSG00000229485	42644758	42644997	-	downstream	20172	19653	NearestLocation	NA
chr10	42625293	42625521	229	*	1319	ENSG00000229485	42644758	42644997	-	downstream	19704	19237	NearestLocation	NA
chr10	43337814	43338042	229	*	1320	ENSG00000252416	43327895	43327998	-	upstream	-9816	9816	NearestLocation	RNU6-885P
chr10	43832825	43833074	250	*	1321	ENSG00000221468	43837234	43837358	+	upstream	-4409	4160	NearestLocation	RNU6ATAC11P
chr10	44193854	44194054	201	*	1322	ENSG00000271173	44223665	44224176	+	upstream	-29811	29611	NearestLocation	NA
chr10	44493744	44494124	381	*	1323	ENSG00000238957	44529988	44530059	+	upstream	-36244	35864	NearestLocation	NA
chr10	44579643	44579870	228	*	1324	ENSG00000238957	44529988	44530059	+	downstream	49655	49584	NearestLocation	NA
chr10	44690500	44691053	554	*	1325	ENSG00000237590	44755050	44757261	-	downstream	66761	63997	NearestLocation	NA
chr10	44740964	44741227	264	*	1326	ENSG00000237590	44755050	44757261	-	downstream	16297	13823	NearestLocation	NA
chr10	44756792	44757087	296	*	1327	ENSG00000237590	44755050	44757261	-	inside	469	174	NearestLocation	NA
chr10	44767654	44767885	232	*	1328	ENSG00000237590	44755050	44757261	-	upstream	-10393	10393	NearestLocation	NA
chr10	44806562	44807031	470	*	1329	ENSG00000229116	44787706	44789157	-	upstream	-17405	17405	NearestLocation	NA
chr10	45408846	45409047	202	*	1330	ENSG00000187783	45406648	45432450	+	inside	2198	2198	NearestLocation	TMEM72
chr10	45448237	45448517	281	*	1331	ENSG00000107551	45454855	45491339	+	upstream	-6618	6338	NearestLocation	RASSF4
chr10	45454577	45454872	296	*	1332	ENSG00000107551	45454855	45491339	+	overlapStart	-278	17	NearestLocation	RASSF4
chr10	45504227	45504437	211	*	1333	ENSG00000165511	45493146	45496336	-	upstream	-7891	7891	NearestLocation	ZNF22-AS1
chr10	45948371	45948675	305	*	1334	ENSG00000231964	45940018	45948569	-	overlapStart	198	106	NearestLocation	LOC102724323
chr10	46168403	46168750	348	*	1335	ENSG00000172671	46111043	46168228	-	upstream	-175	175	NearestLocation	ZFAND4
chr10	46512561	46512886	326	*	1336	ENSG00000239883	46349541	46411619	-	upstream	-100942	100942	NearestLocation	NA
chr10	46546418	46546617	200	*	1337	ENSG00000204179	46549955	46641045	-	downstream	94627	3338	NearestLocation	PTPN20
chr10	46951427	46951803	377	*	1338	ENSG00000231187	46951472	46966835	+	overlapStart	-45	45	NearestLocation	LOC102724593
chr10	47075381	47075602	222	*	1339	ENSG00000204174	47083534	47088320	+	upstream	-8153	7932	NearestLocation	NPY4R
chr10	47098966	47099316	351	*	1340	ENSG00000204174	47083534	47088320	+	downstream	15432	10646	NearestLocation	NPY4R
chr10	47107486	47108051	566	*	1341	ENSG00000204174	47083534	47088320	+	downstream	23952	19166	NearestLocation	NPY4R
chr10	47129150	47129615	466	*	1342	ENSG00000213412	47133338	47133898	-	downstream	4748	3723	NearestLocation	HNRNPA1P33
chr10	47140344	47140631	288	*	1343	ENSG00000213412	47133338	47133898	-	upstream	-6446	6446	NearestLocation	HNRNPA1P33
chr10	47152661	47153007	347	*	1344	ENSG00000213412	47133338	47133898	-	upstream	-18763	18763	NearestLocation	HNRNPA1P33
chr10	47768031	47768338	308	*	1345	ENSG00000215033	47746962	47770871	+	inside	21069	2533	NearestLocation	NA
chr10	48148571	48148851	281	*	1346	ENSG00000224036	48157041	48158148	+	upstream	-8470	8190	NearestLocation	NA
chr10	48276372	48276677	306	*	1347	ENSG00000215020	48255279	48279199	+	inside	21093	2522	NearestLocation	NA
chr10	48377782	48378004	223	*	1348	ENSG00000266000	48387524	48387622	+	upstream	-9742	9520	NearestLocation	NA
chr10	48412196	48412423	228	*	1349	ENSG00000128802	48413092	48416853	-	downstream	4657	669	NearestLocation	NA
chr10	48478536	48478786	251	*	1350	ENSG00000107623	48425815	48438976	-	upstream	-39560	39560	NearestLocation	NA
chr10	48530842	48531176	335	*	1351	ENSG00000107623	48425815	48438976	-	upstream	-91866	91866	NearestLocation	NA
chr10	48531860	48532076	217	*	1352	ENSG00000107623	48425815	48438976	-	upstream	-92884	92884	NearestLocation	NA
chr10	48700032	48700256	225	*	1353	ENSG00000183675	48736874	48827966	-	downstream	127934	36618	NearestLocation	NA
chr10	49196073	49196486	414	*	1354	ENSG00000188279	49199649	49207818	-	downstream	11745	3163	NearestLocation	NA
chr10	49466207	49466592	386	*	1355	ENSG00000170324	49364601	49482941	-	inside	16734	16349	NearestLocation	FRMPD2
chr10	49482833	49483032	200	*	1356	ENSG00000170324	49364601	49482941	-	overlapStart	108	91	NearestLocation	FRMPD2
chr10	49652286	49652516	231	*	1357	ENSG00000248682	49718568	49719632	-	downstream	67346	66052	NearestLocation	NA
chr10	49689009	49689215	207	*	1358	ENSG00000248682	49718568	49719632	-	downstream	30623	29353	NearestLocation	NA
chr10	49787462	49787779	318	*	1359	ENSG00000231906	49754517	49754758	-	upstream	-32704	32704	NearestLocation	NA
chr10	50275378	50275643	266	*	1360	ENSG00000165633	50222290	50323554	-	inside	48176	47911	NearestLocation	VSTM4
chr10	50594236	50594479	244	*	1361	ENSG00000165606	50572237	50603497	-	inside	9261	9018	NearestLocation	DRGX
chr10	50887337	50887536	200	*	1362	ENSG00000178645	50887697	50918307	+	upstream	-360	161	NearestLocation	C10orf53
chr10	50992918	50993140	223	*	1363	ENSG00000226389	50979887	50981345	+	downstream	13031	11573	NearestLocation	NA
chr10	51133924	51134273	350	*	1364	ENSG00000227345	51026325	51130715	-	upstream	-3209	3209	NearestLocation	PARG
chr10	51355625	51355938	314	*	1365	ENSG00000225784	51287081	51371070	-	inside	15445	15132	NearestLocation	NA
chr10	51575241	51575491	251	*	1366	ENSG00000138293	51565108	51590734	+	inside	10133	10133	NearestLocation	NA
chr10	51638585	51639131	547	*	1367	ENSG00000214982	51623417	51732824	+	inside	15168	15168	NearestLocation	NA
chr10	52056963	52057175	213	*	1368	ENSG00000225137	52024738	52026575	+	downstream	32225	30388	NearestLocation	DYNC1I2P1
chr10	52175133	52175416	284	*	1369	ENSG00000269700	52152766	52154321	+	downstream	22367	20812	NearestLocation	NA
chr10	52287223	52287621	399	*	1370	ENSG00000225303	52232574	52234006	+	downstream	54649	53217	NearestLocation	NA
chr10	52310111	52310506	396	*	1371	ENSG00000251950	52345310	52345463	-	downstream	35352	34804	NearestLocation	NA
chr10	52337531	52338018	488	*	1372	ENSG00000251950	52345310	52345463	-	downstream	7932	7292	NearestLocation	NA
chr10	52441040	52441294	255	*	1373	ENSG00000232706	52436503	52446086	+	inside	4537	4537	NearestLocation	NA
chr10	53182429	53182676	248	*	1374	ENSG00000213659	53079586	53080420	+	downstream	102843	102009	NearestLocation	RSU1P3
chr10	53272391	53272594	204	*	1375	ENSG00000216022	53399503	53399592	-	downstream	127201	126909	NearestLocation	NA
chr10	54212443	54212723	281	*	1376	ENSG00000231131	54210634	54230293	-	inside	17850	1809	NearestLocation	LNCAROD;LOC105378305
chr10	54414020	54414429	410	*	1377	ENSG00000228651	54316462	54515169	-	inside	101149	97558	NearestLocation	NA
chr10	54438453	54438836	384	*	1378	ENSG00000228651	54316462	54515169	-	inside	76716	76333	NearestLocation	NA
chr10	54521250	54521530	281	*	1379	ENSG00000228651	54316462	54515169	-	upstream	-6081	6081	NearestLocation	NA
chr10	54567817	54568089	273	*	1380	ENSG00000165471	54525140	54531460	-	upstream	-36357	36357	NearestLocation	MBL2
chr10	54567817	54568089	273	*	1380	LRG_154	54525140	54531460	-	upstream	-36357	36357	NearestLocation	NA
chr10	54644028	54644227	200	*	1381	ENSG00000201196	54612367	54612463	+	downstream	31661	31565	NearestLocation	NA
chr10	54789946	54790237	292	*	1382	ENSG00000231399	54798045	54798304	+	upstream	-8099	7808	NearestLocation	SNRPEP8
chr10	55213036	55213255	220	*	1383	ENSG00000252161	55217957	55218048	+	upstream	-4921	4702	NearestLocation	RNA5SP318
chr10	55237137	55237458	322	*	1384	ENSG00000252161	55217957	55218048	+	downstream	19180	19089	NearestLocation	RNA5SP318
chr10	55249422	55249675	254	*	1385	ENSG00000252161	55217957	55218048	+	downstream	31465	31374	NearestLocation	RNA5SP318
chr10	56518622	56518864	243	*	1386	ENSG00000236958	56624434	56628882	-	downstream	110260	105570	NearestLocation	NA
chr10	56561031	56561268	238	*	1387	ENSG00000236958	56624434	56628882	-	downstream	67851	63166	NearestLocation	NA
chr10	56763430	56763655	226	*	1388	ENSG00000236958	56624434	56628882	-	upstream	-134548	134548	NearestLocation	NA
chr10	57278243	57278597	355	*	1389	ENSG00000228048	57265979	57272977	+	downstream	12264	5266	NearestLocation	NA
chr10	57308302	57308615	314	*	1390	ENSG00000238355	57327499	57327602	+	upstream	-19197	18884	NearestLocation	NA
chr10	57483682	57483955	274	*	1391	ENSG00000270541	57506311	57506668	+	upstream	-22629	22356	NearestLocation	NA
chr10	57627719	57627945	227	*	1392	ENSG00000270541	57506311	57506668	+	downstream	121408	121051	NearestLocation	NA
chr10	57938031	57938230	200	*	1393	ENSG00000122952	58116989	58121036	-	downstream	183005	178759	NearestLocation	ZWINT
chr10	58121546	58121747	202	*	1394	ENSG00000122952	58116989	58121036	-	upstream	-510	510	NearestLocation	ZWINT
chr10	58155154	58155357	204	*	1395	ENSG00000122952	58116989	58121036	-	upstream	-34118	34118	NearestLocation	ZWINT
chr10	58286320	58286541	222	*	1396	ENSG00000238707	58355723	58355791	-	downstream	69471	69182	NearestLocation	NA
chr10	58866001	58866332	332	*	1397	ENSG00000264747	59064239	59064319	-	downstream	198318	197907	NearestLocation	MIR3924
chr10	59022745	59023013	269	*	1398	ENSG00000264747	59064239	59064319	-	downstream	41574	41226	NearestLocation	MIR3924
chr10	59228926	59229167	242	*	1399	ENSG00000235810	59272917	59273185	+	upstream	-43991	43750	NearestLocation	NA
chr10	59241979	59242339	361	*	1400	ENSG00000235810	59272917	59273185	+	upstream	-30938	30578	NearestLocation	NA
chr10	60145126	60145365	240	*	1401	ENSG00000108064	60144782	60158981	+	inside	344	344	NearestLocation	TFAM
chr10	60536057	60536269	213	*	1402	ENSG00000183055	60475314	60476017	+	downstream	60743	60040	NearestLocation	NA
chr10	60681453	60681740	288	*	1403	ENSG00000252076	60628944	60629288	+	downstream	52509	52165	NearestLocation	RN7SKP196
chr10	61108989	61109254	266	*	1404	ENSG00000148541	61005890	61122939	-	inside	13950	13685	NearestLocation	FAM13C
chr10	61319965	61320216	252	*	1405	ENSG00000235469	61311162	61311636	-	upstream	-8329	8329	NearestLocation	NA
chr10	61808047	61808246	200	*	1406	ENSG00000232682	61815632	61820501	+	upstream	-7585	7386	NearestLocation	NA
chr10	61894361	61894668	308	*	1407	ENSG00000202190	61841499	61841612	+	downstream	52862	52749	NearestLocation	NA
chr10	61935277	61935480	204	*	1408	ENSG00000202190	61841499	61841612	+	downstream	93778	93665	NearestLocation	NA
chr10	62060325	62060549	225	*	1409	ENSG00000202190	61841499	61841612	+	downstream	218826	218713	NearestLocation	NA
chr10	62070611	62070936	326	*	1410	ENSG00000202190	61841499	61841612	+	downstream	229112	228999	NearestLocation	NA
chr10	62223708	62223945	238	*	1411	ENSG00000122872	62444263	62444967	+	upstream	-220555	220318	NearestLocation	NA
chr10	62456323	62456522	200	*	1412	ENSG00000122872	62444263	62444967	+	downstream	12060	11356	NearestLocation	NA
chr10	63348677	63348877	201	*	1413	ENSG00000183346	63422719	63526524	+	upstream	-74042	73842	NearestLocation	CABCOCO1
chr10	63381336	63381624	289	*	1414	ENSG00000183346	63422719	63526524	+	upstream	-41383	41095	NearestLocation	CABCOCO1
chr10	64314520	64314779	260	*	1415	ENSG00000263920	64417945	64418012	+	upstream	-103425	103166	NearestLocation	NA
chr10	64756806	64757019	214	*	1416	ENSG00000122877	64571756	64679660	-	upstream	-77146	77146	NearestLocation	EGR2
chr10	65198498	65198817	320	*	1417	ENSG00000235816	65187057	65187713	+	downstream	11441	10785	NearestLocation	NA
chr10	66267899	66268216	318	*	1418	ENSG00000233900	66380131	66380679	-	downstream	112780	111915	NearestLocation	RPL17P35
chr10	66627419	66627659	241	*	1419	ENSG00000216740	66585329	66586336	+	downstream	42090	41083	NearestLocation	NA
chr10	66665926	66666157	232	*	1420	ENSG00000224714	66660894	66684276	-	inside	18350	5032	NearestLocation	LINC02671
chr10	67587146	67587406	261	*	1421	ENSG00000253012	67469818	67469902	+	downstream	117328	117244	NearestLocation	NA
chr10	68032257	68032473	217	*	1422	ENSG00000273360	67839001	67878084	+	downstream	193256	154173	NearestLocation	NA
chr10	68055266	68055664	399	*	1423	ENSG00000252203	68254457	68254557	+	upstream	-199191	198793	NearestLocation	NA
chr10	69340501	69340700	200	*	1424	ENSG00000183230	67672276	69455927	-	inside	115426	115227	NearestLocation	CTNNA3
chr10	69455319	69455603	285	*	1425	ENSG00000183230	67672276	69455927	-	inside	608	324	NearestLocation	CTNNA3
chr10	70378070	70378366	297	*	1426	ENSG00000213025	70392128	70392484	+	upstream	-14058	13762	NearestLocation	NA
chr10	70660590	70660859	270	*	1427	ENSG00000107625	70661034	70706603	+	upstream	-444	175	NearestLocation	DDX50
chr10	70828859	70829172	314	*	1428	ENSG00000122862	70847862	70864567	+	upstream	-19003	18690	NearestLocation	SRGN
chr10	71071120	71071319	200	*	1429	ENSG00000229197	71060188	71060573	-	upstream	-10547	10547	NearestLocation	RPS15AP28
chr10	71087505	71087875	371	*	1430	ENSG00000229197	71060188	71060573	-	upstream	-26932	26932	NearestLocation	RPS15AP28
chr10	71217564	71218000	437	*	1431	ENSG00000099282	71211229	71267425	+	inside	6335	6335	NearestLocation	TSPAN15
chr10	71248668	71248990	323	*	1432	ENSG00000233197	71283067	71283406	-	downstream	34738	34077	NearestLocation	NA
chr10	71481739	71482001	263	*	1433	ENSG00000235645	71444655	71452208	+	downstream	37084	29531	NearestLocation	NA
chr10	71616532	71616736	205	*	1434	ENSG00000266082	71618970	71619055	-	downstream	2523	2234	NearestLocation	NA
chr10	71993341	71993769	429	*	1435	ENSG00000180817	71962586	71993667	-	overlapStart	326	102	NearestLocation	PPA1
chr10	72318598	72318971	374	*	1436	ENSG00000180644	72357104	72362531	-	downstream	43933	38133	NearestLocation	PRF1
chr10	72318598	72318971	374	*	1436	LRG_94	72357104	72362531	-	downstream	43933	38133	NearestLocation	NA
chr10	72586004	72586219	216	*	1437	ENSG00000166224	72575717	72640930	+	inside	10287	10287	NearestLocation	SGPL1
chr10	72650631	72651040	410	*	1438	ENSG00000166228	72642037	72648541	-	upstream	-2090	2090	NearestLocation	PCBD1
chr10	72820502	72820739	238	*	1439	ENSG00000259267	72698810	72715398	+	downstream	121692	105104	NearestLocation	LINC02622
chr10	72979331	72979560	230	*	1440	ENSG00000237512	72976981	72977985	-	upstream	-1346	1346	NearestLocation	UNC5B-AS1
chr10	72994804	72995134	331	*	1441	ENSG00000237512	72976981	72977985	-	upstream	-16819	16819	NearestLocation	UNC5B-AS1
chr10	73395118	73395377	260	*	1442	ENSG00000214688	73471458	73497581	-	downstream	102463	76081	NearestLocation	C10orf105
chr10	73506324	73506557	234	*	1443	ENSG00000214688	73471458	73497581	-	upstream	-8743	8743	NearestLocation	C10orf105
chr10	73600030	73600380	351	*	1444	ENSG00000238446	73604492	73604551	-	downstream	4521	4112	NearestLocation	RNU7-38P
chr10	73905995	73906274	280	*	1445	ENSG00000200294	73940616	73940747	+	upstream	-34621	34342	NearestLocation	NA
chr10	74080476	74080772	297	*	1446	ENSG00000148719	74092588	74114988	-	downstream	34512	11816	NearestLocation	DNAJB12
chr10	74094005	74094204	200	*	1447	ENSG00000148719	74092588	74114988	-	inside	20983	1417	NearestLocation	DNAJB12
chr10	74523969	74524237	269	*	1448	ENSG00000272627	74526318	74526810	+	upstream	-2349	2081	NearestLocation	NA
chr10	74648155	74648433	279	*	1449	ENSG00000138315	74653339	74692791	+	upstream	-5184	4906	NearestLocation	OIT3
chr10	74857100	74857356	257	*	1450	ENSG00000122884	74766975	74856732	-	upstream	-368	368	NearestLocation	P4HA1
chr10	75193333	75193600	268	*	1451	ENSG00000166343	75183339	75193319	-	upstream	-14	14	NearestLocation	MSS51
chr10	75216058	75216316	259	*	1452	ENSG00000166343	75183339	75193319	-	upstream	-22739	22739	NearestLocation	MSS51
chr10	75289217	75289473	257	*	1453	ENSG00000207327	75288809	75288915	-	upstream	-302	302	NearestLocation	RNU6-883P
chr10	75408749	75409099	351	*	1454	ENSG00000271848	75413797	75434477	+	upstream	-5048	4698	NearestLocation	NA
chr10	75411171	75411538	368	*	1455	ENSG00000271848	75413797	75434477	+	upstream	-2626	2259	NearestLocation	NA
chr10	75652173	75652404	232	*	1456	ENSG00000122861	75668935	75677255	+	upstream	-16762	16531	NearestLocation	PLAU
chr10	75690562	75690769	208	*	1457	ENSG00000222047	75669727	75682535	-	upstream	-8027	8027	NearestLocation	C10orf55
chr10	76123972	76124562	591	*	1458	ENSG00000214629	76131293	76132174	+	upstream	-7321	6731	NearestLocation	RPSAP6
chr10	76498709	76498937	229	*	1459	ENSG00000213525	76504144	76504465	-	downstream	5756	5207	NearestLocation	NA
chr10	76683224	76683673	450	*	1460	ENSG00000156650	76585340	76792380	+	inside	97884	97884	NearestLocation	KAT6B
chr10	76809851	76810113	263	*	1461	ENSG00000188716	76797594	76818272	-	inside	8421	8159	NearestLocation	DUSP29
chr10	77164898	77165180	283	*	1462	ENSG00000165655	77157588	77161664	-	upstream	-3234	3234	NearestLocation	ZNF503
chr10	77268539	77268883	345	*	1463	ENSG00000207583	77312216	77312311	+	upstream	-43677	43333	NearestLocation	MIR606
chr10	77307169	77307417	249	*	1464	ENSG00000207583	77312216	77312311	+	upstream	-5047	4799	NearestLocation	MIR606
chr10	77373599	77373851	253	*	1465	ENSG00000148655	77360998	78319925	+	inside	12601	12601	NearestLocation	LRMDA
chr10	77495398	77495610	213	*	1466	ENSG00000228280	77502498	77503513	+	upstream	-7100	6888	NearestLocation	NA
chr10	77664401	77664838	438	*	1467	ENSG00000215921	77583444	77583536	-	upstream	-80865	80865	NearestLocation	NA
chr10	77810760	77811181	422	*	1468	ENSG00000221232	77887009	77887069	-	downstream	76309	75828	NearestLocation	NA
chr10	77871987	77872203	217	*	1469	ENSG00000221232	77887009	77887069	-	downstream	15082	14806	NearestLocation	NA
chr10	77875195	77875581	387	*	1470	ENSG00000221232	77887009	77887069	-	downstream	11874	11428	NearestLocation	NA
chr10	77893429	77893710	282	*	1471	ENSG00000221232	77887009	77887069	-	upstream	-6360	6360	NearestLocation	NA
chr10	78313725	78313952	228	*	1472	ENSG00000269256	78318108	78320752	-	downstream	7027	4156	NearestLocation	NA
chr10	78343448	78343891	444	*	1473	ENSG00000269256	78318108	78320752	-	upstream	-22696	22696	NearestLocation	NA
chr10	78349967	78350228	262	*	1474	ENSG00000269256	78318108	78320752	-	upstream	-29215	29215	NearestLocation	NA
chr10	79043151	79043418	268	*	1475	ENSG00000224500	79073699	79075452	+	upstream	-30548	30281	NearestLocation	NA
chr10	79047474	79047839	366	*	1476	ENSG00000224500	79073699	79075452	+	upstream	-26225	25860	NearestLocation	NA
chr10	79049630	79049829	200	*	1477	ENSG00000224500	79073699	79075452	+	upstream	-24069	23870	NearestLocation	NA
chr10	79205450	79205795	346	*	1478	ENSG00000228092	79193330	79193540	-	upstream	-11910	11910	NearestLocation	COX6CP15
chr10	79482777	79483008	232	*	1479	ENSG00000213514	79490524	79494527	+	upstream	-7747	7516	NearestLocation	NA
chr10	79793619	79793846	228	*	1480	ENSG00000138326	79793518	79816570	+	inside	101	101	NearestLocation	RPS24
chr10	79932201	79932420	220	*	1481	ENSG00000230417	80008505	80434724	+	upstream	-76304	76085	NearestLocation	LINC00856;LINC00595
chr10	79933293	79933586	294	*	1482	ENSG00000230417	80008505	80434724	+	upstream	-75212	74919	NearestLocation	LINC00856;LINC00595
chr10	80016116	80016315	200	*	1483	ENSG00000230417	80008505	80434724	+	inside	7611	7611	NearestLocation	LINC00856;LINC00595
chr10	80020016	80020331	316	*	1484	ENSG00000227136	80027085	80090352	+	upstream	-7069	6754	NearestLocation	NA
chr10	80026547	80026747	201	*	1485	ENSG00000227136	80027085	80090352	+	upstream	-538	338	NearestLocation	NA
chr10	80103027	80103290	264	*	1486	ENSG00000230229	80112354	80115857	+	upstream	-9327	9064	NearestLocation	NA
chr10	80119535	80119734	200	*	1487	ENSG00000230229	80112354	80115857	+	downstream	7181	3678	NearestLocation	NA
chr10	80347961	80348427	467	*	1488	ENSG00000228683	80455819	80456779	-	downstream	108818	107392	NearestLocation	NA
chr10	80394710	80395048	339	*	1489	ENSG00000228683	80455819	80456779	-	downstream	62069	60771	NearestLocation	NA
chr10	80507183	80507382	200	*	1490	ENSG00000223243	80510359	80510454	+	upstream	-3176	2977	NearestLocation	NA
chr10	80565074	80565360	287	*	1491	ENSG00000223243	80510359	80510454	+	downstream	54715	54620	NearestLocation	NA
chr10	80763209	80763469	261	*	1492	ENSG00000229569	80760241	80763560	-	inside	351	91	NearestLocation	NA
chr10	80779892	80780115	224	*	1493	ENSG00000229569	80760241	80763560	-	upstream	-16332	16332	NearestLocation	NA
chr10	80818983	80819186	204	*	1494	ENSG00000224596	80703085	80827652	-	inside	8669	8466	NearestLocation	ZMIZ1-AS1
chr10	80983252	80983567	316	*	1495	ENSG00000108179	81107225	81115093	+	upstream	-123973	123658	NearestLocation	PPIF
chr10	81018720	81018995	276	*	1496	ENSG00000108179	81107225	81115093	+	upstream	-88505	88230	NearestLocation	PPIF
chr10	81030421	81030691	271	*	1497	ENSG00000108179	81107225	81115093	+	upstream	-76804	76534	NearestLocation	PPIF
chr10	81109707	81109970	264	*	1498	ENSG00000108179	81107225	81115093	+	inside	2482	2482	NearestLocation	PPIF
chr10	81221968	81222301	334	*	1499	ENSG00000165424	81142081	81205383	-	upstream	-16585	16585	NearestLocation	ZCCHC24
chr10	81467885	81468229	345	*	1500	ENSG00000188199	81462983	81474437	+	inside	4902	4902	NearestLocation	NUTM2B
chr10	81606019	81606346	328	*	1501	ENSG00000228570	81601114	81610632	+	inside	4905	4286	NearestLocation	NUTM2E
chr10	81746371	81746703	333	*	1502	ENSG00000225100	81742666	81742996	-	upstream	-3375	3375	NearestLocation	DPY19L2P5
chr10	81924894	81925133	240	*	1503	ENSG00000189129	81891438	81905115	+	downstream	33456	19779	NearestLocation	PLAC9
chr10	82037510	82037762	253	*	1504	ENSG00000151224	82031576	82049440	-	inside	11930	5934	NearestLocation	MAT1A
chr10	82175888	82176121	234	*	1505	ENSG00000122378	82167585	82192753	+	inside	8303	8303	NearestLocation	PRXL2A
chr10	82263855	82264126	272	*	1506	ENSG00000226659	82289353	82295698	-	downstream	31843	25227	NearestLocation	LOC101929574
chr10	82422289	82422668	380	*	1507	ENSG00000231082	82409553	82413488	+	downstream	12736	8801	NearestLocation	LINC02655
chr10	82498427	82498669	243	*	1508	ENSG00000233703	82509388	82510987	-	downstream	12560	10719	NearestLocation	NA
chr10	82560799	82561004	206	*	1509	ENSG00000231060	82535921	82537844	-	upstream	-22955	22955	NearestLocation	NA
chr10	83284230	83284429	200	*	1510	ENSG00000185737	83635070	84746935	+	upstream	-350840	350641	NearestLocation	NRG3
chr10	83529911	83530301	391	*	1511	ENSG00000185737	83635070	84746935	+	upstream	-105159	104769	NearestLocation	NRG3
chr10	83831054	83831253	200	*	1512	ENSG00000221378	83810018	83810104	+	downstream	21036	20950	NearestLocation	NA
chr10	83865601	83866043	443	*	1513	ENSG00000221378	83810018	83810104	+	downstream	55583	55497	NearestLocation	NA
chr10	84105218	84105422	205	*	1514	ENSG00000207275	84100527	84100632	+	downstream	4691	4586	NearestLocation	RNU6-441P
chr10	84157699	84157905	207	*	1515	ENSG00000207275	84100527	84100632	+	downstream	57172	57067	NearestLocation	RNU6-441P
chr10	85305657	85306115	459	*	1516	ENSG00000265268	85196790	85196885	-	upstream	-108772	108772	NearestLocation	NA
chr10	86662316	86662623	308	*	1517	ENSG00000238469	86623021	86623118	+	downstream	39295	39198	NearestLocation	NA
chr10	86919157	86919367	211	*	1518	ENSG00000237267	86953177	86957714	-	downstream	38557	33810	NearestLocation	LINC01519
chr10	87079251	87079534	284	*	1519	ENSG00000223993	87191699	87192271	-	downstream	113020	112165	NearestLocation	LINC02647
chr10	87217065	87217282	218	*	1520	ENSG00000230962	87209349	87251753	+	inside	7716	7716	NearestLocation	LINC01520
chr10	87783928	87784244	317	*	1521	ENSG00000200487	87812205	87812323	+	upstream	-28277	27961	NearestLocation	RNA5SP322
chr10	88424518	88424860	343	*	1522	ENSG00000122367	88428206	88495825	+	upstream	-3688	3346	NearestLocation	LDB3
chr10	88444216	88444491	276	*	1523	LRG_385	88428321	88495825	+	inside	15895	15895	NearestLocation	NA
chr10	88515383	88515618	236	*	1524	ENSG00000272631	88509511	88516055	-	inside	672	437	NearestLocation	NA
chr10	88534869	88535104	236	*	1525	ENSG00000107779	88516407	88692595	+	inside	18462	18462	NearestLocation	BMPR1A
chr10	88608605	88608804	200	*	1526	ENSG00000270874	88614453	88615993	-	downstream	7388	5649	NearestLocation	NA
chr10	88608935	88609361	427	*	1527	ENSG00000270874	88614453	88615993	-	downstream	7058	5092	NearestLocation	NA
chr10	88631592	88631848	257	*	1528	ENSG00000270874	88614453	88615993	-	upstream	-15599	15599	NearestLocation	NA
chr10	88660973	88661228	256	*	1529	ENSG00000200176	88649326	88649490	+	downstream	11647	11483	NearestLocation	RNU1-19P
chr10	89122435	89122727	293	*	1530	ENSG00000214562	89117425	89130452	+	inside	5010	5010	NearestLocation	NUTM2D
chr10	89605846	89606189	344	*	1531	ENSG00000138138	89511269	89601100	-	upstream	-4746	4746	NearestLocation	ATAD1
chr10	90106365	90106929	565	*	1532	ENSG00000184719	90033621	90344287	-	inside	237922	72744	NearestLocation	RNLS
chr10	90183573	90183820	248	*	1533	ENSG00000184719	90033621	90344287	-	inside	160714	149952	NearestLocation	RNLS
chr10	90560552	90560842	291	*	1534	ENSG00000173239	90562487	90580303	+	upstream	-1935	1645	NearestLocation	LIPM
chr10	90657209	90657560	352	*	1535	ENSG00000138134	90639491	90734910	+	inside	17718	17718	NearestLocation	STAMBPL1
chr10	90751637	90751857	221	*	1536	ENSG00000107796	90694831	90751147	-	upstream	-490	490	NearestLocation	ACTA2
chr10	90998745	90999099	355	*	1537	ENSG00000266769	91024097	91024163	-	downstream	25418	24998	NearestLocation	NA
chr10	91020096	91020402	307	*	1538	ENSG00000266769	91024097	91024163	-	downstream	4067	3695	NearestLocation	NA
chr10	91080616	91080853	238	*	1539	ENSG00000119917	91087651	91100728	+	upstream	-7035	6798	NearestLocation	IFIT3
chr10	91152624	91152858	235	*	1540	ENSG00000185745	91152303	91163745	+	inside	321	321	NearestLocation	IFIT1
chr10	91238852	91239115	264	*	1541	ENSG00000234452	91215821	91227897	+	downstream	23031	10955	NearestLocation	SLC16A12-AS1
chr10	91275179	91275460	282	*	1542	ENSG00000152779	91190051	91316398	-	inside	41219	40938	NearestLocation	SLC16A12
chr10	92179201	92179400	200	*	1543	ENSG00000224750	92213927	92262725	+	upstream	-34726	34527	NearestLocation	NA
chr10	92690835	92691264	430	*	1544	ENSG00000201604	92682488	92682592	-	upstream	-8243	8243	NearestLocation	RNU6-740P
chr10	92766176	92766424	249	*	1545	ENSG00000273124	92757237	92757470	-	upstream	-8706	8706	NearestLocation	NA
chr10	92810265	92810686	422	*	1546	ENSG00000220585	92812808	92814804	+	upstream	-2543	2122	NearestLocation	NA
chr10	93127191	93127400	210	*	1547	ENSG00000165338	93170096	93274586	+	upstream	-42905	42696	NearestLocation	HECTD2
chr10	93177415	93177614	200	*	1548	ENSG00000165338	93170096	93274586	+	inside	7319	7319	NearestLocation	HECTD2
chr10	93204775	93204974	200	*	1549	ENSG00000271385	93224335	93224465	-	downstream	19690	19361	NearestLocation	NA
chr10	93334847	93335076	230	*	1550	ENSG00000223876	93304609	93304855	+	downstream	30238	29992	NearestLocation	RPS27P1
chr10	93342059	93342288	230	*	1551	ENSG00000223876	93304609	93304855	+	downstream	37450	37204	NearestLocation	RPS27P1
chr10	93368653	93368960	308	*	1552	ENSG00000119938	93388199	93392811	-	downstream	24158	19239	NearestLocation	PPP1R3C
chr10	93392659	93393075	417	*	1553	ENSG00000119938	93388199	93392811	-	overlapStart	152	152	NearestLocation	PPP1R3C
chr10	93431875	93432262	388	*	1554	ENSG00000213449	93426537	93427539	-	upstream	-4336	4336	NearestLocation	NA
chr10	93669137	93669460	324	*	1555	ENSG00000174721	93666346	93669240	-	overlapStart	103	103	NearestLocation	FGFBP3
chr10	93743251	93743523	273	*	1556	ENSG00000095564	93683526	93790082	+	inside	59725	46559	NearestLocation	BTAF1
chr10	93792887	93793187	301	*	1557	ENSG00000252993	93835999	93836122	+	upstream	-43112	42812	NearestLocation	NA
chr10	93847569	93847833	265	*	1558	ENSG00000252993	93835999	93836122	+	downstream	11570	11447	NearestLocation	NA
chr10	94674342	94674582	241	*	1559	ENSG00000225118	94637849	94638046	-	upstream	-36296	36296	NearestLocation	NA
chr10	95262700	95263190	491	*	1560	ENSG00000138180	95256389	95288849	+	inside	6311	6311	NearestLocation	CEP55
chr10	95284543	95284943	401	*	1561	ENSG00000212396	95270305	95270437	-	upstream	-14106	14106	NearestLocation	RNA5SP323
chr10	95511607	95511817	211	*	1562	ENSG00000108231	95517566	95557916	+	upstream	-5959	5749	NearestLocation	LGI1
chr10	97007615	97007854	240	*	1563	ENSG00000234026	96988000	96990901	-	upstream	-16714	16714	NearestLocation	NA
chr10	97020211	97020474	264	*	1564	ENSG00000234026	96988000	96990901	-	upstream	-29310	29310	NearestLocation	NA
chr10	97028182	97028504	323	*	1565	ENSG00000107438	96997329	97050781	-	inside	22599	22277	NearestLocation	PDLIM1
chr10	97227036	97227323	288	*	1566	ENSG00000095637	97071528	97321171	-	inside	94135	93848	NearestLocation	SORBS1
chr10	97268640	97268891	252	*	1567	ENSG00000095637	97071528	97321171	-	inside	52531	52280	NearestLocation	SORBS1
chr10	98061553	98061752	200	*	1568	ENSG00000107447	98064085	98098321	+	upstream	-2532	2333	NearestLocation	DNTT
chr10	98378946	98379216	271	*	1569	ENSG00000202047	98379133	98379240	+	overlapStart	-187	24	NearestLocation	RNA5SP324
chr10	98401108	98401422	315	*	1570	ENSG00000227032	98380634	98381464	-	upstream	-19644	19644	NearestLocation	RPS2P36
chr10	98956298	98956707	410	*	1571	ENSG00000187122	98757795	98945677	-	upstream	-10621	10621	NearestLocation	SLIT1
chr10	99057663	99057951	289	*	1572	ENSG00000269891	98757795	99052413	-	upstream	-5250	5250	NearestLocation	ARHGAP19-SLIT1
chr10	99057663	99057951	289	*	1572	ENSG00000213390	98978996	99052413	-	upstream	-5250	5250	NearestLocation	ARHGAP19
chr10	99393192	99393494	303	*	1573	ENSG00000171160	99374310	99393344	-	overlapStart	152	150	NearestLocation	MORN4
chr10	99504111	99504410	300	*	1574	ENSG00000155256	99496878	99520664	+	inside	7233	7233	NearestLocation	ZFYVE27
chr10	99531900	99532297	398	*	1575	ENSG00000120057	99526508	99531709	-	upstream	-191	191	NearestLocation	SFRP5
chr10	99548697	99549060	364	*	1576	ENSG00000120057	99526508	99531709	-	upstream	-16988	16988	NearestLocation	SFRP5
chr10	100111841	100112084	244	*	1577	ENSG00000221419	100154975	100155064	-	downstream	43223	42891	NearestLocation	NA
chr10	100121020	100121233	214	*	1578	ENSG00000221419	100154975	100155064	-	downstream	34044	33742	NearestLocation	NA
chr10	100133526	100133848	323	*	1579	ENSG00000221419	100154975	100155064	-	downstream	21538	21127	NearestLocation	NA
chr10	100162362	100162673	312	*	1580	ENSG00000221419	100154975	100155064	-	upstream	-7298	7298	NearestLocation	NA
chr10	100227164	100227444	281	*	1581	ENSG00000107521	100175955	100206684	-	upstream	-20480	20480	NearestLocation	HPS1
chr10	100457798	100457999	202	*	1582	ENSG00000107521	100175955	100206684	-	upstream	-251114	251114	NearestLocation	HPS1
chr10	100544696	100545080	385	*	1583	ENSG00000236818	100772860	100773709	-	downstream	229013	227780	NearestLocation	NA
chr10	100669843	100670165	323	*	1584	ENSG00000236818	100772860	100773709	-	downstream	103866	102695	NearestLocation	NA
chr10	100868602	100868887	286	*	1585	ENSG00000234109	100807396	100808076	+	downstream	61206	60526	NearestLocation	RPL7P36
chr10	101151790	101152010	221	*	1586	ENSG00000120053	101156627	101190381	-	downstream	38591	4617	NearestLocation	GOT1
chr10	101531568	101532038	471	*	1587	ENSG00000023839	101542489	101611949	+	upstream	-10921	10451	NearestLocation	ABCC2
chr10	101605811	101606017	207	*	1588	ENSG00000227351	101548321	101549167	-	upstream	-56644	56644	NearestLocation	NANOGP6
chr10	101673766	101674023	258	*	1589	ENSG00000227695	101686767	101718138	+	upstream	-13001	12744	NearestLocation	DNMBP-AS1
chr10	101726227	101726449	223	*	1590	ENSG00000227695	101686767	101718138	+	downstream	39460	8089	NearestLocation	DNMBP-AS1
chr10	102771279	102771520	242	*	1591	ENSG00000107816	102756375	102767593	+	downstream	14904	3686	NearestLocation	LZTS2
chr10	103071492	103071761	270	*	1592	ENSG00000225208	103070775	103071262	+	downstream	717	230	NearestLocation	NA
chr10	103113485	103113744	260	*	1593	ENSG00000166167	103113820	103317078	+	upstream	-335	76	NearestLocation	BTRC
chr10	103114440	103114709	270	*	1594	ENSG00000166167	103113820	103317078	+	inside	620	620	NearestLocation	BTRC
chr10	103154352	103154683	332	*	1595	ENSG00000239091	103131609	103131709	-	upstream	-22643	22643	NearestLocation	NA
chr10	103201898	103202191	294	*	1596	ENSG00000239091	103131609	103131709	-	upstream	-70189	70189	NearestLocation	NA
chr10	103210188	103210387	200	*	1597	ENSG00000239091	103131609	103131709	-	upstream	-78479	78479	NearestLocation	NA
chr10	103326174	103326502	329	*	1598	ENSG00000166171	103330317	103369425	+	upstream	-4143	3815	NearestLocation	DPCD
chr10	103428118	103428622	505	*	1599	ENSG00000107829	103370423	103455052	-	inside	26934	26430	NearestLocation	FBXW4
chr10	103434326	103434691	366	*	1600	ENSG00000107829	103370423	103455052	-	inside	20726	20361	NearestLocation	FBXW4
chr10	103509428	103509671	244	*	1601	ENSG00000107831	103529899	103535854	-	downstream	26426	20228	NearestLocation	FGF8
chr10	103540638	103541003	366	*	1602	ENSG00000107833	103541082	103543170	-	downstream	2532	79	NearestLocation	NPM3
chr10	103646743	103646981	239	*	1603	ENSG00000120049	103585731	103603677	-	upstream	-43066	43066	NearestLocation	KCNIP2
chr10	104093871	104094204	334	*	1604	ENSG00000077150	104153867	104162281	+	upstream	-59996	59663	NearestLocation	NFKB2
chr10	104151565	104151764	200	*	1605	ENSG00000077150	104153867	104162281	+	upstream	-2302	2103	NearestLocation	NFKB2
chr10	104380301	104380532	232	*	1606	ENSG00000272933	104402549	104403897	-	downstream	23596	22017	NearestLocation	NA
chr10	104529849	104530057	209	*	1607	ENSG00000166272	104503727	104576021	+	inside	26122	26122	NearestLocation	CYP17A1-AS1;WBP1L
chr10	104991067	104991266	200	*	1608	ENSG00000235376	105005644	105007773	+	upstream	-14577	14378	NearestLocation	RPEL1
chr10	105480212	105480543	332	*	1609	ENSG00000222503	105432916	105433023	+	downstream	47296	47189	NearestLocation	NA
chr10	105532265	105532487	223	*	1610	ENSG00000107957	105348285	105615301	-	inside	83036	82814	NearestLocation	SH3PXD2A
chr10	105554353	105554683	331	*	1611	ENSG00000107957	105348285	105615301	-	inside	60948	60618	NearestLocation	SH3PXD2A
chr10	105948034	105948320	287	*	1612	ENSG00000208033	105978547	105978641	-	downstream	30607	30227	NearestLocation	MIR609
chr10	106012908	106013155	248	*	1613	ENSG00000266852	106028080	106028177	-	downstream	15269	14925	NearestLocation	MIR4482
chr10	106092327	106092657	331	*	1614	ENSG00000148841	106071894	106098162	-	inside	5835	5505	NearestLocation	ITPRIP
chr10	106471044	106471494	451	*	1615	ENSG00000226387	106424366	106425958	-	upstream	-45086	45086	NearestLocation	SORCS3-AS1
chr10	106584201	106584483	283	*	1616	ENSG00000226387	106424366	106425958	-	upstream	-158243	158243	NearestLocation	SORCS3-AS1
chr10	107451641	107451883	243	*	1617	ENSG00000213260	107446080	107446809	+	downstream	5561	4832	NearestLocation	NA
chr10	107516258	107516464	207	*	1618	ENSG00000229466	107568533	107578955	-	downstream	62697	52069	NearestLocation	NA
chr10	108674664	108674896	233	*	1619	ENSG00000200626	108729779	108729908	+	upstream	-55115	54883	NearestLocation	RNA5SP325
chr10	108785401	108785805	405	*	1620	ENSG00000200626	108729779	108729908	+	downstream	55622	55493	NearestLocation	RNA5SP325
chr10	108893036	108893281	246	*	1621	ENSG00000108018	108333421	108924292	-	inside	31256	31011	NearestLocation	SORCS1
chr10	109855124	109855344	221	*	1622	ENSG00000229981	109517591	109871360	-	inside	16236	16016	NearestLocation	LINC01435
chr10	109940614	109940829	216	*	1623	ENSG00000229981	109517591	109871360	-	upstream	-69254	69254	NearestLocation	LINC01435
chr10	110072888	110073094	207	*	1624	ENSG00000234544	110055857	110056290	+	downstream	17031	16598	NearestLocation	PTGES3P5
chr10	110398857	110399204	348	*	1625	ENSG00000223381	110470276	110599121	+	upstream	-71419	71072	NearestLocation	NA
chr10	111037091	111037328	238	*	1626	ENSG00000200217	110999397	110999504	+	downstream	37694	37587	NearestLocation	RNU6-839P
chr10	111066998	111067264	267	*	1627	ENSG00000200217	110999397	110999504	+	downstream	67601	67494	NearestLocation	RNU6-839P
chr10	111188878	111189090	213	*	1628	ENSG00000232728	111287877	111288766	+	upstream	-98999	98787	NearestLocation	NA
chr10	111234590	111235037	448	*	1629	ENSG00000232728	111287877	111288766	+	upstream	-53287	52840	NearestLocation	NA
chr10	111658418	111658700	283	*	1630	ENSG00000108039	111624524	111683311	-	inside	24893	24611	NearestLocation	XPNPEP1
chr10	111728717	111729011	295	*	1631	ENSG00000203876	111701029	111713649	-	upstream	-15068	15068	NearestLocation	ADD3-AS1
chr10	111896795	111897103	309	*	1632	ENSG00000226734	111898972	111899184	-	downstream	2389	1869	NearestLocation	SNRPGP12
chr10	112064743	112064952	210	*	1633	ENSG00000119953	112050488	112064709	-	upstream	-34	34	NearestLocation	SMNDC1
chr10	112114137	112114336	200	*	1634	ENSG00000119953	112050488	112064709	-	upstream	-49428	49428	NearestLocation	SMNDC1
chr10	112253653	112253942	290	*	1635	ENSG00000273143	112188598	112255962	-	inside	2309	2020	NearestLocation	NA
chr10	112396788	112397016	229	*	1636	ENSG00000263919	112393589	112393883	-	upstream	-2905	2905	NearestLocation	NA
chr10	112401007	112401243	237	*	1637	ENSG00000223302	112402436	112402543	-	downstream	1536	1193	NearestLocation	NA
chr10	112444845	112445365	521	*	1638	ENSG00000203867	112404155	112599227	+	inside	40690	40690	NearestLocation	RBM20
chr10	112444845	112445365	521	*	1638	LRG_382	112404155	112599227	+	inside	40690	40690	NearestLocation	NA
chr10	112461328	112461795	468	*	1639	ENSG00000252036	112516214	112516481	+	upstream	-54886	54419	NearestLocation	RN7SKP288
chr10	112554769	112555004	236	*	1640	ENSG00000199364	112520900	112521000	+	downstream	33869	33769	NearestLocation	RNA5SP327
chr10	113499140	113499428	289	*	1641	ENSG00000230809	113257949	113258699	-	upstream	-240441	240441	NearestLocation	RPS6P15
chr10	113625447	113625646	200	*	1642	ENSG00000119927	113909624	113975135	-	downstream	349688	283978	NearestLocation	GPAM
chr10	113943505	113943825	321	*	1643	ENSG00000119927	113909624	113975135	-	inside	31630	31310	NearestLocation	GPAM
chr10	114123121	114123334	214	*	1644	ENSG00000243316	114067939	114116332	-	upstream	-6789	6789	NearestLocation	GUCY2GP
chr10	114206719	114207249	531	*	1645	ENSG00000151532	114206756	114578503	+	overlapStart	-37	37	NearestLocation	VTI1A
chr10	114506212	114506498	287	*	1646	ENSG00000233340	114431571	114437578	-	upstream	-68634	68634	NearestLocation	NA
chr10	114568503	114568841	339	*	1647	ENSG00000260917	114583249	114587485	+	upstream	-14746	14408	NearestLocation	LOC103344931
chr10	114569238	114569513	276	*	1648	ENSG00000260917	114583249	114587485	+	upstream	-14011	13736	NearestLocation	LOC103344931
chr10	114698699	114698990	292	*	1649	ENSG00000148737	114710009	114927437	+	upstream	-11310	11019	NearestLocation	TCF7L2
chr10	114706155	114706424	270	*	1650	ENSG00000148737	114710009	114927437	+	upstream	-3854	3585	NearestLocation	TCF7L2
chr10	114823257	114823512	256	*	1651	ENSG00000227560	114747235	114747624	+	downstream	76022	75633	NearestLocation	RPS15AP30
chr10	115530387	115530703	317	*	1652	ENSG00000148735	115511213	115543188	+	inside	19174	12485	NearestLocation	PLEKHS1
chr10	115782099	115782313	215	*	1653	ENSG00000043591	115803806	115806667	+	upstream	-21707	21493	NearestLocation	ADRB1
chr10	115993920	115994188	269	*	1654	ENSG00000165816	115999018	116051272	+	upstream	-5098	4830	NearestLocation	VWA2
chr10	116082133	116082554	422	*	1655	ENSG00000230165	116005833	116006473	+	downstream	76300	75660	NearestLocation	NA
chr10	116109524	116109832	309	*	1656	ENSG00000169129	116054583	116164515	-	inside	54991	54683	NearestLocation	AFAP1L2
chr10	116127677	116127878	202	*	1657	ENSG00000169129	116054583	116164515	-	inside	36838	36637	NearestLocation	AFAP1L2
chr10	116202015	116202258	244	*	1658	ENSG00000242912	116183531	116183826	-	upstream	-18189	18189	NearestLocation	RN7SL384P
chr10	116239221	116239436	216	*	1659	ENSG00000229668	116261756	116262106	-	downstream	22885	22320	NearestLocation	NA
chr10	116275126	116275410	285	*	1660	ENSG00000229668	116261756	116262106	-	upstream	-13020	13020	NearestLocation	NA
chr10	116363815	116364041	227	*	1661	ENSG00000238577	116416269	116416353	+	upstream	-52454	52228	NearestLocation	NA
chr10	116414902	116415317	416	*	1662	ENSG00000238577	116416269	116416353	+	upstream	-1367	952	NearestLocation	NA
chr10	116415526	116415737	212	*	1663	ENSG00000238577	116416269	116416353	+	upstream	-743	532	NearestLocation	NA
chr10	116463382	116463666	285	*	1664	ENSG00000228169	116449902	116450393	-	upstream	-12989	12989	NearestLocation	NA
chr10	116474008	116474373	366	*	1665	ENSG00000228169	116449902	116450393	-	upstream	-23615	23615	NearestLocation	NA
chr10	116480659	116480898	240	*	1666	ENSG00000228169	116449902	116450393	-	upstream	-30266	30266	NearestLocation	NA
chr10	117250575	117250873	299	*	1667	ENSG00000270965	117579353	117579998	-	downstream	329423	328480	NearestLocation	NTAN1P1
chr10	117774369	117774651	283	*	1668	ENSG00000270965	117579353	117579998	-	upstream	-194371	194371	NearestLocation	NTAN1P1
chr10	117852504	117852709	206	*	1669	ENSG00000151892	117816444	118032979	-	inside	180475	36060	NearestLocation	GFRA1
chr10	118996532	118996775	244	*	1670	ENSG00000165646	119000604	119038941	+	upstream	-4072	3829	NearestLocation	SLC18A2
chr10	119032306	119032517	212	*	1671	ENSG00000225936	118999111	119001434	-	upstream	-30872	30872	NearestLocation	NA
chr10	119188072	119188300	229	*	1672	ENSG00000258114	119184705	119249930	+	inside	3367	3367	NearestLocation	NA
chr10	119256117	119256465	349	*	1673	ENSG00000170370	119301955	119309056	+	upstream	-45838	45490	NearestLocation	EMX2
chr10	119433769	119433995	227	*	1674	ENSG00000234952	119494824	119495918	+	upstream	-61055	60829	NearestLocation	NA
chr10	119911071	119911297	227	*	1675	ENSG00000238276	120001076	120027222	+	upstream	-90005	89779	NearestLocation	LOC101927760
chr10	120481951	120482228	278	*	1676	ENSG00000151893	120433679	120514761	-	inside	32810	32533	NearestLocation	CACUL1
chr10	120492326	120492537	212	*	1677	ENSG00000151893	120433679	120514761	-	inside	22435	22224	NearestLocation	CACUL1
chr10	120630409	120630633	225	*	1678	ENSG00000236058	120631561	120632114	-	downstream	1705	928	NearestLocation	RPL17P36
chr10	120670919	120671131	213	*	1679	ENSG00000213574	120692186	120692807	-	downstream	21888	21055	NearestLocation	NA
chr10	120839325	120839577	253	*	1680	ENSG00000107581	120794356	120840316	-	inside	991	739	NearestLocation	EIF3A
chr10	121096118	121096317	200	*	1681	ENSG00000236426	121094006	121095694	-	upstream	-424	424	NearestLocation	NA
chr10	121101129	121101436	308	*	1682	ENSG00000236426	121094006	121095694	-	upstream	-5435	5435	NearestLocation	NA
chr10	121447385	121448022	638	*	1683	ENSG00000232823	121442639	121443335	-	upstream	-4050	4050	NearestLocation	NA
chr10	122859182	122859537	356	*	1684	ENSG00000236762	122892604	122893237	-	downstream	34055	33067	NearestLocation	NA
chr10	123025002	123025262	261	*	1685	ENSG00000227143	122938214	122945480	+	downstream	86788	79522	NearestLocation	LINC01153
chr10	123181127	123181336	210	*	1686	ENSG00000222979	123170430	123170714	+	downstream	10697	10413	NearestLocation	RN7SKP167
chr10	123214998	123215250	253	*	1687	ENSG00000222979	123170430	123170714	+	downstream	44568	44284	NearestLocation	RN7SKP167
chr10	123318924	123319123	200	*	1688	ENSG00000066468	123237848	123357972	-	inside	39048	38849	NearestLocation	FGFR2
chr10	123496247	123496471	225	*	1689	ENSG00000224250	123495818	123499245	+	inside	429	429	NearestLocation	NA
chr10	123899036	123899510	475	*	1690	ENSG00000138152	124030821	124097677	+	upstream	-131785	131311	NearestLocation	BTBD16
chr10	124568092	124568291	200	*	1691	ENSG00000272135	124578332	124585965	+	upstream	-10240	10041	NearestLocation	NA
chr10	124740363	124740611	249	*	1692	ENSG00000119965	124690419	124713919	-	upstream	-26444	26444	NearestLocation	C10orf88
chr10	124899127	124899360	234	*	1693	ENSG00000188620	124895478	124897257	+	downstream	3649	1870	NearestLocation	HMX3
chr10	125232237	125232471	235	*	1694	ENSG00000225152	125185229	125187156	-	upstream	-45081	45081	NearestLocation	NA
chr10	125273142	125273348	207	*	1695	ENSG00000234542	125333743	125343283	+	upstream	-60601	60395	NearestLocation	NA
chr10	126043461	126043793	333	*	1696	ENSG00000065154	126085872	126107545	-	downstream	64084	42079	NearestLocation	OAT
chr10	126092166	126092474	309	*	1697	ENSG00000065154	126085872	126107545	-	inside	15379	6294	NearestLocation	OAT
chr10	127304085	127304292	208	*	1698	ENSG00000237675	127262940	127267014	+	downstream	41145	37071	NearestLocation	TEX36-AS1
chr10	127495045	127495336	292	*	1699	ENSG00000265092	127508309	127508391	+	upstream	-13264	12973	NearestLocation	MIR4484
chr10	127842750	127843187	438	*	1700	ENSG00000222740	127834043	127834151	-	upstream	-8599	8599	NearestLocation	RNA5SP328
chr10	128207526	128207839	314	*	1701	ENSG00000221717	128245532	128245633	-	downstream	38107	37693	NearestLocation	NA
chr10	128214154	128214468	315	*	1702	ENSG00000221717	128245532	128245633	-	downstream	31479	31064	NearestLocation	NA
chr10	128810775	128811112	338	*	1703	ENSG00000232935	128811765	128824739	-	downstream	13964	653	NearestLocation	NA
chr10	128915383	128915663	281	*	1704	ENSG00000188916	128933694	128994422	-	downstream	79039	18031	NearestLocation	INSYN2A
chr10	129155626	129155954	329	*	1705	ENSG00000188916	128933694	128994422	-	upstream	-161204	161204	NearestLocation	INSYN2A
chr10	129206479	129206747	269	*	1706	ENSG00000214285	129347613	129350935	+	upstream	-141134	140866	NearestLocation	NPS
chr10	129825678	129825914	237	*	1707	ENSG00000227076	129732962	129734431	+	downstream	92716	91247	NearestLocation	NA
chr10	129846283	129846571	289	*	1708	ENSG00000148773	129894923	129924649	-	downstream	78366	48352	NearestLocation	MKI67
chr10	129860639	129860983	345	*	1709	ENSG00000148773	129894923	129924649	-	downstream	64010	33940	NearestLocation	MKI67
chr10	130370072	130370300	229	*	1710	ENSG00000234640	130114546	130118478	-	upstream	-251594	251594	NearestLocation	NA
chr10	130397822	130398157	336	*	1711	ENSG00000234640	130114546	130118478	-	upstream	-279344	279344	NearestLocation	NA
chr10	130860976	130861219	244	*	1712	ENSG00000232985	130757036	130758326	-	upstream	-102650	102650	NearestLocation	NA
chr10	131435280	131435479	200	*	1713	ENSG00000237224	131498729	131499821	-	downstream	64541	63250	NearestLocation	NA
chr10	131699219	131699475	257	*	1714	ENSG00000266676	131641563	131641638	-	upstream	-57581	57581	NearestLocation	MIR4297
chr10	131926215	131926457	243	*	1715	ENSG00000233319	131930034	131930505	-	downstream	4290	3577	NearestLocation	NA
chr10	132160446	132160822	377	*	1716	ENSG00000236303	132237331	132281418	+	upstream	-76885	76509	NearestLocation	NA
chr10	132942051	132942346	296	*	1717	ENSG00000230098	132893481	132894040	+	downstream	48570	48011	NearestLocation	TCERG1L-AS1
chr10	133078376	133078612	237	*	1718	ENSG00000176769	132890654	133109984	-	inside	31608	31372	NearestLocation	TCERG1L
chr10	134149328	134149672	345	*	1719	ENSG00000148814	134145614	134195010	+	inside	3714	3714	NearestLocation	LRRC27
chr10	134149755	134150216	462	*	1720	ENSG00000148814	134145614	134195010	+	inside	4141	4141	NearestLocation	LRRC27
chr10	134441272	134441621	350	*	1721	ENSG00000068383	134351324	134596979	+	inside	89948	89948	NearestLocation	INPP5A
chr10	134444828	134445186	359	*	1722	ENSG00000068383	134351324	134596979	+	inside	93504	93504	NearestLocation	INPP5A
chr10	134705756	134705959	204	*	1723	ENSG00000171811	134621896	134756327	-	inside	50571	50368	NearestLocation	CFAP46
chr10	134957208	134957589	382	*	1724	ENSG00000235264	134958116	134958808	-	downstream	1600	527	NearestLocation	RPL5P28
chr10	135479729	135480017	289	*	1725	ENSG00000258911	135480654	135481921	+	upstream	-925	637	NearestLocation	NA
chr10	135482997	135483251	255	*	1726	ENSG00000258434	135483662	135488584	+	upstream	-665	411	NearestLocation	NA
chr10	135486348	135486591	244	*	1727	ENSG00000259139	135487297	135488539	+	upstream	-949	706	NearestLocation	NA
chr10	135489637	135489909	273	*	1728	ENSG00000258617	135490272	135495193	+	upstream	-635	363	NearestLocation	NA
chr10	135492970	135493198	229	*	1729	ENSG00000258514	135493906	135495148	+	upstream	-936	708	NearestLocation	NA
chr10	135496239	135496480	242	*	1730	ENSG00000235950	135496888	135498492	+	upstream	-649	408	NearestLocation	NA
chr11	220697	221058	362	*	1731	ENSG00000177963	207511	215113	+	downstream	13186	5584	NearestLocation	RIC8A
chr11	450950	451204	255	*	1732	ENSG00000174915	448268	491393	+	inside	2682	2682	NearestLocation	PTDSS2
chr11	585224	585666	443	*	1733	ENSG00000070047	576486	612222	+	inside	8738	8738	NearestLocation	PHRF1
chr11	964837	965267	431	*	1734	ENSG00000264671	951295	951364	-	upstream	-13473	13473	NearestLocation	NA
chr11	1557408	1557683	276	*	1735	ENSG00000233930	1592583	1620414	+	upstream	-35175	34900	NearestLocation	KRTAP5-AS1
chr11	1704702	1704926	225	*	1736	ENSG00000205865	1704499	1706859	-	inside	2157	203	NearestLocation	FAM99B
chr11	1989063	1989262	200	*	1737	ENSG00000214026	1968508	2005752	+	inside	20555	16490	NearestLocation	LOC107987373;MRPL23
chr11	2000299	2000524	226	*	1738	ENSG00000226416	2004467	2011150	-	downstream	10851	3943	NearestLocation	MRPL23-AS1
chr11	2009431	2009697	267	*	1739	ENSG00000226416	2004467	2011150	-	inside	1719	1453	NearestLocation	MRPL23-AS1
chr11	2141876	2142163	288	*	1740	ENSG00000240801	2150351	2151194	-	downstream	9318	8188	NearestLocation	NA
chr11	2324821	2325228	408	*	1741	ENSG00000110665	2316875	2324279	-	upstream	-542	542	NearestLocation	C11orf21
chr11	2657717	2657926	210	*	1742	ENSG00000269821	2629558	2721224	-	inside	63507	28159	NearestLocation	KCNQ1OT1
chr11	2737717	2738018	302	*	1743	ENSG00000269821	2629558	2721224	-	upstream	-16493	16493	NearestLocation	KCNQ1OT1
chr11	2799887	2800095	209	*	1744	ENSG00000236041	2792586	2792807	+	downstream	7301	7080	NearestLocation	COX6CP18
chr11	3170287	3170597	311	*	1745	ENSG00000021762	3108346	3187969	-	inside	17682	17372	NearestLocation	OSBPL5
chr11	3400373	3400581	209	*	1746	ENSG00000005801	3360491	3400448	-	overlapStart	75	75	NearestLocation	ZNF195
chr11	3422447	3422649	203	*	1747	ENSG00000189398	3412010	3412982	-	upstream	-9465	9465	NearestLocation	OR7E12P
chr11	3530762	3531053	292	*	1748	ENSG00000255522	3552650	3552838	+	upstream	-21888	21597	NearestLocation	NA
chr11	3537660	3537986	327	*	1749	ENSG00000255522	3552650	3552838	+	upstream	-14990	14664	NearestLocation	NA
chr11	3675008	3675295	288	*	1750	ENSG00000129744	3666358	3685646	+	inside	8650	8650	NearestLocation	ART1
chr11	3675427	3676039	613	*	1751	ENSG00000129744	3666358	3685646	+	inside	9069	9069	NearestLocation	ART1
chr11	3845980	3846293	314	*	1752	ENSG00000250404	3837982	3843130	+	downstream	7998	2850	NearestLocation	NA
chr11	3852991	3853313	323	*	1753	ENSG00000177105	3848208	3862213	-	inside	9222	4783	NearestLocation	RHOG
chr11	3888899	3889482	584	*	1754	ENSG00000263421	3877292	3877371	+	downstream	11607	11528	NearestLocation	NA
chr11	3920655	3920990	336	*	1755	ENSG00000230593	3913623	3914120	-	upstream	-6535	6535	NearestLocation	NA
chr11	3955978	3956190	213	*	1756	ENSG00000206976	3943797	3943933	+	downstream	12181	12045	NearestLocation	NA
chr11	4322644	4322968	325	*	1757	ENSG00000186223	4308732	4309313	-	upstream	-13331	13331	NearestLocation	NA
chr11	4680197	4680404	208	*	1758	ENSG00000180723	4682083	4682993	-	downstream	2796	1679	NearestLocation	OR51A9P
chr11	4872385	4872587	203	*	1759	ENSG00000176922	4869427	4870514	-	upstream	-1871	1871	NearestLocation	OR51S1
chr11	5378837	5379058	222	*	1760	ENSG00000230087	5375922	5376808	+	downstream	2915	2029	NearestLocation	LOC100418885
chr11	5621694	5622007	314	*	1761	ENSG00000258588	5617955	5665628	+	inside	3739	3739	NearestLocation	TRIM6-TRIM34
chr11	5706027	5706465	439	*	1762	ENSG00000132274	5710919	5758319	+	upstream	-4892	4454	NearestLocation	TRIM22
chr11	6209031	6209232	202	*	1763	ENSG00000254444	6129365	6206806	-	upstream	-2225	2225	NearestLocation	NA
chr11	6301969	6302297	329	*	1764	ENSG00000270435	6318419	6319836	-	downstream	17867	16122	NearestLocation	NA
chr11	6628569	6628807	239	*	1765	ENSG00000254641	6629897	6631366	-	downstream	2797	1090	NearestLocation	NA
chr11	6712021	6712230	210	*	1766	ENSG00000241678	6707122	6707600	-	upstream	-4421	4421	NearestLocation	RPL21P94
chr11	6727177	6727430	254	*	1767	ENSG00000241678	6707122	6707600	-	upstream	-19577	19577	NearestLocation	RPL21P94
chr11	7621764	7622018	255	*	1768	ENSG00000254864	7590097	7593277	-	upstream	-28487	28487	NearestLocation	NA
chr11	8067468	8067757	290	*	1769	ENSG00000254921	8056993	8061265	-	upstream	-6203	6203	NearestLocation	NA
chr11	8227944	8228194	251	*	1770	ENSG00000246820	8190714	8200450	+	downstream	37230	27494	NearestLocation	NA
chr11	9340662	9341117	456	*	1771	ENSG00000166471	9302201	9336327	-	upstream	-4335	4335	NearestLocation	TMEM41B
chr11	9368718	9369040	323	*	1772	ENSG00000166471	9302201	9336327	-	upstream	-32391	32391	NearestLocation	TMEM41B
chr11	9383958	9384350	393	*	1773	ENSG00000205339	9406169	9469673	+	upstream	-22211	21819	NearestLocation	IPO7
chr11	9406934	9407133	200	*	1774	ENSG00000205339	9406169	9469673	+	inside	765	765	NearestLocation	IPO7
chr11	9551730	9551990	261	*	1775	ENSG00000166483	9595228	9615004	+	upstream	-43498	43238	NearestLocation	WEE1
chr11	9573453	9573780	328	*	1776	ENSG00000166483	9595228	9615004	+	upstream	-21775	21448	NearestLocation	WEE1
chr11	9596515	9596832	318	*	1777	ENSG00000166483	9595228	9615004	+	inside	1287	1287	NearestLocation	WEE1
chr11	9635432	9635799	368	*	1778	ENSG00000243964	9627689	9628156	+	downstream	7743	7276	NearestLocation	RPL23AP65
chr11	9780458	9780864	407	*	1779	ENSG00000245522	9776317	9781080	-	inside	622	216	NearestLocation	LINC02709
chr11	10012147	10012429	283	*	1780	ENSG00000254765	9980291	9981337	-	upstream	-30810	30810	NearestLocation	GLULP2
chr11	10433355	10433597	243	*	1781	ENSG00000221574	10420739	10420864	-	upstream	-12491	12491	NearestLocation	RNU6ATAC33P
chr11	10480614	10481109	496	*	1782	ENSG00000255823	10529434	10530723	-	downstream	50109	48325	NearestLocation	MTRNR2L8
chr11	10879166	10879691	526	*	1783	ENSG00000247271	10879806	10928349	+	upstream	-640	115	NearestLocation	ZBED5-AS1
chr11	11095031	11095230	200	*	1784	ENSG00000254401	11139401	11205158	+	upstream	-44370	44171	NearestLocation	NA
chr11	11253524	11253766	243	*	1785	ENSG00000255123	11261306	11261827	+	upstream	-7782	7540	NearestLocation	NA
chr11	11318057	11318362	306	*	1786	ENSG00000255260	11264735	11265262	-	upstream	-52795	52795	NearestLocation	NA
chr11	11350993	11351336	344	*	1787	ENSG00000255351	11373973	11374854	+	upstream	-22980	22637	NearestLocation	NA
chr11	11809714	11809926	213	*	1788	ENSG00000255309	11780648	11780980	-	upstream	-28734	28734	NearestLocation	NA
chr11	12013956	12014186	231	*	1789	ENSG00000050165	11984653	12031316	-	inside	17360	17130	NearestLocation	DKK3
chr11	12180457	12180847	391	*	1790	ENSG00000133816	12115543	12285334	+	inside	64914	64914	NearestLocation	MICALCL;MICAL2
chr11	12199409	12199654	246	*	1791	ENSG00000133816	12115543	12285334	+	inside	83866	83866	NearestLocation	MICALCL;MICAL2
chr11	12222532	12223099	568	*	1792	ENSG00000254680	12282973	12284720	-	downstream	62188	59874	NearestLocation	NA
chr11	12238616	12238815	200	*	1793	ENSG00000254680	12282973	12284720	-	downstream	46104	44158	NearestLocation	NA
chr11	12358943	12359329	387	*	1794	ENSG00000264283	12366314	12366408	+	upstream	-7371	6985	NearestLocation	NA
chr11	12569654	12569881	228	*	1795	ENSG00000254847	12559630	12562514	-	upstream	-7140	7140	NearestLocation	NA
chr11	12603507	12603831	325	*	1796	ENSG00000254847	12559630	12562514	-	upstream	-40993	40993	NearestLocation	NA
chr11	12821844	12822205	362	*	1797	ENSG00000254688	12843982	12845214	-	downstream	23370	21777	NearestLocation	NA
chr11	12875280	12875521	242	*	1798	ENSG00000255067	12870342	12870980	+	downstream	4938	4300	NearestLocation	NA
chr11	12910316	12910673	358	*	1799	ENSG00000252329	12926364	12926535	-	downstream	16219	15691	NearestLocation	NA
chr11	13033928	13034332	405	*	1800	ENSG00000254670	13022637	13030706	-	upstream	-3222	3222	NearestLocation	RASSF10-DT
chr11	13229336	13229629	294	*	1801	ENSG00000255018	13173747	13173895	+	downstream	55589	55441	NearestLocation	NA
chr11	13628334	13628707	374	*	1802	ENSG00000228901	13631910	13632318	-	downstream	3984	3203	NearestLocation	NA
chr11	14006678	14006962	285	*	1803	ENSG00000152268	13983914	14289646	+	inside	22764	22764	NearestLocation	NA
chr11	14103951	14104213	263	*	1804	ENSG00000212365	14156532	14156646	+	upstream	-52581	52319	NearestLocation	RNA5SP332
chr11	14279764	14280103	340	*	1805	ENSG00000254418	14284392	14295237	-	downstream	15473	4289	NearestLocation	NA
chr11	14332038	14332282	245	*	1806	ENSG00000254418	14284392	14295237	-	upstream	-36801	36801	NearestLocation	NA
chr11	14541493	14541856	364	*	1807	ENSG00000256206	14515329	14541890	-	inside	397	34	NearestLocation	NA
chr11	14951992	14952252	261	*	1808	ENSG00000253179	14929064	14929532	+	downstream	22928	22460	NearestLocation	CALCP
chr11	15573971	15574170	200	*	1809	ENSG00000254946	15574401	15612644	+	upstream	-430	231	NearestLocation	LINC02751
chr11	15612743	15612954	212	*	1810	ENSG00000254789	15593569	15643937	-	inside	31194	19174	NearestLocation	NA
chr11	15707448	15707648	201	*	1811	ENSG00000254695	15665431	15726914	+	inside	42017	19266	NearestLocation	NA
chr11	15885556	15885755	200	*	1812	ENSG00000254661	15932503	15948989	+	upstream	-46947	46748	NearestLocation	LINC02682
chr11	15922737	15923060	324	*	1813	ENSG00000254661	15932503	15948989	+	upstream	-9766	9443	NearestLocation	LINC02682
chr11	15942489	15942727	239	*	1814	ENSG00000254661	15932503	15948989	+	inside	9986	6262	NearestLocation	LINC02682
chr11	15990890	15991205	316	*	1815	ENSG00000254878	16044736	16053061	+	upstream	-53846	53531	NearestLocation	NA
chr11	16147963	16148295	333	*	1816	ENSG00000221556	16145862	16145942	+	downstream	2101	2021	NearestLocation	NA
chr11	16627960	16628263	304	*	1817	ENSG00000110696	16634679	16778428	+	upstream	-6719	6416	NearestLocation	C11orf58
chr11	16633455	16633704	250	*	1818	ENSG00000110696	16634679	16778428	+	upstream	-1224	975	NearestLocation	C11orf58
chr11	16653838	16654038	201	*	1819	ENSG00000110696	16634679	16778428	+	inside	19159	19159	NearestLocation	C11orf58
chr11	16875456	16875707	252	*	1820	ENSG00000199883	16863800	16864134	+	downstream	11656	11322	NearestLocation	NA
chr11	16878821	16879109	289	*	1821	ENSG00000199883	16863800	16864134	+	downstream	15021	14687	NearestLocation	NA
chr11	16904911	16905202	292	*	1822	ENSG00000199883	16863800	16864134	+	downstream	41111	40777	NearestLocation	NA
chr11	16955485	16955932	448	*	1823	ENSG00000251928	16995968	16996035	-	downstream	40550	40036	NearestLocation	NA
chr11	16958253	16958548	296	*	1824	ENSG00000251928	16995968	16996035	-	downstream	37782	37420	NearestLocation	NA
chr11	16963939	16964275	337	*	1825	ENSG00000251928	16995968	16996035	-	downstream	32096	31693	NearestLocation	NA
chr11	17439843	17440320	478	*	1826	ENSG00000255035	17457219	17457728	-	downstream	17885	16899	NearestLocation	NA
chr11	18343793	18343998	206	*	1827	ENSG00000110768	18343842	18388591	+	overlapStart	-49	49	NearestLocation	GTF2H1
chr11	18921800	18922300	501	*	1828	ENSG00000255536	18931983	18932943	-	downstream	11143	9683	NearestLocation	MRGPRX5P
chr11	18942990	18943322	333	*	1829	ENSG00000255536	18931983	18932943	-	upstream	-10047	10047	NearestLocation	MRGPRX5P
chr11	18965170	18965469	300	*	1830	ENSG00000170255	18955360	18961054	-	upstream	-4116	4116	NearestLocation	MRGPRX1
chr11	19231191	19231390	200	*	1831	ENSG00000129170	19203578	19232120	-	inside	929	730	NearestLocation	CSRP3
chr11	19599003	19599244	242	*	1832	ENSG00000265210	19596857	19596919	+	downstream	2146	2084	NearestLocation	MIR4486
chr11	19672621	19672960	340	*	1833	ENSG00000207407	19612703	19612838	-	upstream	-59783	59783	NearestLocation	NA
chr11	19787832	19788189	358	*	1834	ENSG00000264309	19781550	19781629	-	upstream	-6203	6203	NearestLocation	MIR4694
chr11	19814149	19814401	253	*	1835	ENSG00000264309	19781550	19781629	-	upstream	-32520	32520	NearestLocation	MIR4694
chr11	19977182	19977492	311	*	1836	ENSG00000254542	20000245	20002883	-	downstream	25701	22753	NearestLocation	NA
chr11	20009011	20009597	587	*	1837	ENSG00000254542	20000245	20002883	-	upstream	-6128	6128	NearestLocation	NA
chr11	20213782	20214186	405	*	1838	ENSG00000109851	20177701	20182159	-	upstream	-31623	31623	NearestLocation	DBX1
chr11	20688736	20689014	279	*	1839	ENSG00000165973	20691117	21597227	+	upstream	-2381	2103	NearestLocation	NELL1
chr11	21060446	21060718	273	*	1840	ENSG00000201059	21022427	21022543	-	upstream	-37903	37903	NearestLocation	RNA5SP336
chr11	21343165	21343364	200	*	1841	ENSG00000225477	21305283	21525745	+	inside	37882	37882	NearestLocation	LOC100631258
chr11	21610389	21610653	265	*	1842	ENSG00000252816	21405347	21405455	-	upstream	-204934	204934	NearestLocation	RNA5SP337
chr11	22325971	22326190	220	*	1843	ENSG00000091664	22359643	22401049	+	upstream	-33672	33453	NearestLocation	SLC17A6
chr11	22470991	22471190	200	*	1844	ENSG00000255323	22467234	22513565	-	inside	42574	3757	NearestLocation	LINC01495
chr11	23695040	23695247	208	*	1845	ENSG00000255193	23752134	23818516	+	upstream	-57094	56887	NearestLocation	NA
chr11	24833251	24833484	234	*	1846	ENSG00000255489	24722821	24723121	+	downstream	110430	110130	NearestLocation	NA
chr11	25508155	25508414	260	*	1847	ENSG00000265837	25558824	25558917	+	upstream	-50669	50410	NearestLocation	NA
chr11	26107675	26107917	243	*	1848	ENSG00000255086	26067534	26069145	+	downstream	40141	38530	NearestLocation	LOC100533706
chr11	26671445	26671750	306	*	1849	ENSG00000148942	26688566	26744974	-	downstream	73529	16816	NearestLocation	SLC5A12
chr11	26908294	26908524	231	*	1850	ENSG00000176971	27015628	27018630	+	upstream	-107334	107104	NearestLocation	FIBIN
chr11	27033540	27033859	320	*	1851	ENSG00000176971	27015628	27018630	+	downstream	17912	14910	NearestLocation	FIBIN
chr11	27076799	27077029	231	*	1852	ENSG00000129151	27062272	27149356	+	inside	14527	14527	NearestLocation	BBOX1
chr11	27209688	27209957	270	*	1853	ENSG00000254560	27068733	27241660	-	inside	31972	31703	NearestLocation	BBOX1-AS1
chr11	27361490	27361787	298	*	1854	ENSG00000109881	27352374	27385415	-	inside	23925	9116	NearestLocation	CCDC34
chr11	27414347	27414645	299	*	1855	ENSG00000109881	27352374	27385415	-	upstream	-28932	28932	NearestLocation	CCDC34
chr11	28388491	28388690	200	*	1856	ENSG00000255322	28373654	28548588	+	inside	14837	14837	NearestLocation	NA
chr11	28863030	28863309	280	*	1857	ENSG00000249867	28724162	29085368	+	inside	138868	138868	NearestLocation	LINC02742
chr11	29559898	29560235	338	*	1858	ENSG00000255029	29540623	29574186	+	inside	19275	13951	NearestLocation	NA
chr11	29795376	29795606	231	*	1859	ENSG00000240554	29747311	29748112	+	downstream	48065	47264	NearestLocation	RPL7AP58
chr11	30218229	30218428	200	*	1860	ENSG00000255288	30188710	30188853	+	downstream	29519	29376	NearestLocation	NA
chr11	30501401	30501726	326	*	1861	ENSG00000255480	30447099	30450815	+	downstream	54302	50586	NearestLocation	NA
chr11	30626807	30627280	474	*	1862	ENSG00000066382	30406040	30608419	-	upstream	-18388	18388	NearestLocation	MPPED2
chr11	30656944	30657195	252	*	1863	ENSG00000066382	30406040	30608419	-	upstream	-48525	48525	NearestLocation	MPPED2
chr11	30762845	30763090	246	*	1864	ENSG00000066382	30406040	30608419	-	upstream	-154426	154426	NearestLocation	MPPED2
chr11	30958085	30958320	236	*	1865	ENSG00000251968	31195471	31195552	+	upstream	-237386	237151	NearestLocation	NA
chr11	31273172	31273507	336	*	1866	ENSG00000255370	31302219	31302534	-	downstream	29362	28712	NearestLocation	NA
chr11	31779004	31779343	340	*	1867	ENSG00000228061	31658875	31789501	-	inside	10497	10158	NearestLocation	NA
chr11	31954481	31954697	217	*	1868	ENSG00000254584	32057527	32062864	-	downstream	108383	102830	NearestLocation	LOC100506675
chr11	32363824	32364056	233	*	1869	ENSG00000227160	32133595	32364955	-	inside	1131	899	NearestLocation	NA
chr11	32401393	32401650	258	*	1870	ENSG00000227160	32133595	32364955	-	upstream	-36438	36438	NearestLocation	NA
chr11	32500885	32501100	216	*	1871	ENSG00000184937	32409321	32457176	-	upstream	-43709	43709	NearestLocation	WT1
chr11	32565257	32565566	310	*	1872	ENSG00000149100	32605344	32627808	+	upstream	-40087	39778	NearestLocation	EIF3M
chr11	33071309	33071508	200	*	1873	ENSG00000176148	33060963	33127489	+	inside	10346	10346	NearestLocation	TCP11L1
chr11	33312996	33313205	210	*	1874	ENSG00000110422	33278218	33378569	+	inside	34778	34778	NearestLocation	HIPK3
chr11	33342538	33342889	352	*	1875	ENSG00000223134	33376011	33376091	+	upstream	-33473	33122	NearestLocation	NA
chr11	33351289	33351517	229	*	1876	ENSG00000223134	33376011	33376091	+	upstream	-24722	24494	NearestLocation	NA
chr11	33564666	33564914	249	*	1877	ENSG00000110427	33563618	33695648	+	inside	1048	1048	NearestLocation	KIAA1549L
chr11	33674191	33674716	526	*	1878	ENSG00000255202	33686766	33718247	-	downstream	44056	12050	NearestLocation	NA
chr11	33958624	33959183	560	*	1879	ENSG00000135363	33880122	33913836	-	upstream	-44788	44788	NearestLocation	LMO2
chr11	33992648	33992852	205	*	1880	ENSG00000135363	33880122	33913836	-	upstream	-78812	78812	NearestLocation	LMO2
chr11	34265706	34265963	258	*	1881	ENSG00000201867	34210721	34210822	+	downstream	54985	54884	NearestLocation	NA
chr11	34324431	34324721	291	*	1882	ENSG00000254708	34356665	34357550	-	downstream	33119	31944	NearestLocation	NA
chr11	34332764	34333155	392	*	1883	ENSG00000254708	34356665	34357550	-	downstream	24786	23510	NearestLocation	NA
chr11	34349697	34349944	248	*	1884	ENSG00000254708	34356665	34357550	-	downstream	7853	6721	NearestLocation	NA
chr11	34607480	34607687	208	*	1885	ENSG00000255427	34592423	34595529	+	downstream	15057	11951	NearestLocation	NA
chr11	34622560	34622818	259	*	1886	ENSG00000135373	34642640	34682604	+	upstream	-20080	19822	NearestLocation	EHF
chr11	34743523	34743825	303	*	1887	ENSG00000271369	34731147	34731708	+	downstream	12376	11815	NearestLocation	NA
chr11	35000167	35000401	235	*	1888	ENSG00000251862	34963384	34963467	+	downstream	36783	36700	NearestLocation	MIR1343
chr11	35213818	35214265	448	*	1889	ENSG00000251194	35234097	35235554	+	upstream	-20279	19832	NearestLocation	NA
chr11	35571448	35571657	210	*	1890	ENSG00000149090	35453370	35551848	-	upstream	-19600	19600	NearestLocation	PAMR1
chr11	35812955	35813418	464	*	1891	ENSG00000261355	35835882	35839557	+	upstream	-22927	22464	NearestLocation	NA
chr11	36049269	36049468	200	*	1892	ENSG00000263389	36031648	36031754	+	downstream	17621	17515	NearestLocation	MIR3973
chr11	36119820	36120019	200	*	1893	ENSG00000263389	36031648	36031754	+	downstream	88172	88066	NearestLocation	MIR3973
chr11	36126484	36126868	385	*	1894	ENSG00000263389	36031648	36031754	+	downstream	94836	94730	NearestLocation	MIR3973
chr11	36384804	36385052	249	*	1895	ENSG00000255186	36408071	36409800	+	upstream	-23267	23019	NearestLocation	NA
chr11	36474524	36474723	200	*	1896	ENSG00000255060	36446997	36447672	-	upstream	-26852	26852	NearestLocation	NA
chr11	36554570	36554824	255	*	1897	ENSG00000166349	36532259	36614706	+	inside	22311	22311	NearestLocation	RAG1
chr11	37301169	37301549	381	*	1898	ENSG00000251838	37723675	37723770	-	downstream	422601	422126	NearestLocation	NA
chr11	37322622	37323018	397	*	1899	ENSG00000251838	37723675	37723770	-	downstream	401148	400657	NearestLocation	NA
chr11	37374814	37375060	247	*	1900	ENSG00000251838	37723675	37723770	-	downstream	348956	348615	NearestLocation	NA
chr11	37862613	37862815	203	*	1901	ENSG00000254516	37960151	37976213	+	upstream	-97538	97336	NearestLocation	LINC02760
chr11	37880662	37881060	399	*	1902	ENSG00000254516	37960151	37976213	+	upstream	-79489	79091	NearestLocation	LINC02760
chr11	37967867	37968165	299	*	1903	ENSG00000254516	37960151	37976213	+	inside	7716	7716	NearestLocation	LINC02760
chr11	38000186	38000650	465	*	1904	ENSG00000254516	37960151	37976213	+	downstream	40035	23973	NearestLocation	LINC02760
chr11	38009676	38009890	215	*	1905	ENSG00000254516	37960151	37976213	+	downstream	49525	33463	NearestLocation	LINC02760
chr11	38432682	38432887	206	*	1906	ENSG00000255477	38520545	38521736	+	upstream	-87863	87658	NearestLocation	NA
chr11	38788471	38788919	449	*	1907	ENSG00000254562	38668026	38695791	+	downstream	120445	92680	NearestLocation	LINC01493
chr11	40150890	40151097	208	*	1908	ENSG00000255347	40105260	40106067	-	upstream	-44823	44823	NearestLocation	NA
chr11	40775906	40776145	240	*	1909	ENSG00000221357	40781072	40781155	+	upstream	-5166	4927	NearestLocation	NA
chr11	41079183	41079440	258	*	1910	ENSG00000252922	41144457	41144562	-	downstream	65379	65017	NearestLocation	RNU6-365P
chr11	41295561	41295868	308	*	1911	ENSG00000255132	41416145	41448054	+	upstream	-120584	120277	NearestLocation	NA
chr11	42998368	42998649	282	*	1912	ENSG00000254914	42961325	42961548	+	downstream	37043	36820	NearestLocation	NA
chr11	43219025	43219228	204	*	1913	ENSG00000251557	43142312	43290943	-	inside	71918	71715	NearestLocation	HNRNPKP3
chr11	43714673	43715035	363	*	1914	ENSG00000243721	43740226	43740696	+	upstream	-25553	25191	NearestLocation	NA
chr11	43760406	43760776	371	*	1915	ENSG00000254512	43755309	43756114	+	downstream	5097	4292	NearestLocation	NA
chr11	43769008	43769382	375	*	1916	ENSG00000254512	43755309	43756114	+	downstream	13699	12894	NearestLocation	NA
chr11	43902064	43902279	216	*	1917	ENSG00000246250	43851259	43902276	-	overlapStart	212	3	NearestLocation	NA
chr11	44028491	44028724	234	*	1918	ENSG00000205126	44069531	44081527	+	upstream	-41040	40807	NearestLocation	ACCSL
chr11	44052153	44052456	304	*	1919	ENSG00000205126	44069531	44081527	+	upstream	-17378	17075	NearestLocation	ACCSL
chr11	44161337	44161548	212	*	1920	ENSG00000151348	44117099	44266979	+	inside	44238	44238	NearestLocation	EXT2
chr11	44228995	44229208	214	*	1921	ENSG00000052850	44281994	44331716	-	downstream	102721	52786	NearestLocation	ALX4
chr11	44265289	44265725	437	*	1922	ENSG00000052850	44281994	44331716	-	downstream	66427	16269	NearestLocation	ALX4
chr11	44715201	44715505	305	*	1923	ENSG00000255079	44716413	44717851	-	downstream	2650	908	NearestLocation	NA
chr11	44722838	44723145	308	*	1924	ENSG00000255079	44716413	44717851	-	upstream	-4987	4987	NearestLocation	NA
chr11	44747740	44748259	520	*	1925	ENSG00000157570	44748015	44953972	+	overlapStart	-275	244	NearestLocation	TSPAN18
chr11	44824594	44824863	270	*	1926	ENSG00000255032	44740942	44758242	-	upstream	-66352	66352	NearestLocation	NA
chr11	44974351	44974816	466	*	1927	ENSG00000175274	44907454	44972840	-	upstream	-1511	1511	NearestLocation	TP53I11
chr11	44992796	44993154	359	*	1928	ENSG00000254654	44995453	44999579	+	upstream	-2657	2299	NearestLocation	LINC02685
chr11	45014397	45014644	248	*	1929	ENSG00000254654	44995453	44999579	+	downstream	18944	14818	NearestLocation	LINC02685
chr11	45585280	45585680	401	*	1930	ENSG00000254514	45604075	45605024	+	upstream	-18795	18395	NearestLocation	NA
chr11	45716591	45716963	373	*	1931	ENSG00000254519	45743858	45765801	+	upstream	-27267	26895	NearestLocation	LOC100507384
chr11	45775978	45776351	374	*	1932	ENSG00000255226	45772374	45773422	-	upstream	-2556	2556	NearestLocation	NA
chr11	45845033	45845328	296	*	1933	ENSG00000255447	45834770	45846809	+	inside	10263	1481	NearestLocation	NA
chr11	46134587	46134867	281	*	1934	ENSG00000263539	46134673	46134769	-	includeFeature	182	86	NearestLocation	NA
chr11	46718821	46719120	300	*	1935	ENSG00000175220	46698630	46722165	-	inside	3344	3045	NearestLocation	ARHGAP1
chr11	46928133	46928394	262	*	1936	ENSG00000134569	46878419	46940193	-	inside	12060	11799	NearestLocation	LRP4
chr11	47026303	47026530	228	*	1937	ENSG00000271350	47062578	47063496	-	downstream	37193	36048	NearestLocation	NA
chr11	47198786	47199104	319	*	1938	ENSG00000149182	47185848	47198676	-	upstream	-110	110	NearestLocation	ARFGAP2
chr11	47270202	47270505	304	*	1939	ENSG00000134575	47260853	47270457	-	overlapStart	255	48	NearestLocation	ACP2
chr11	47373348	47373621	274	*	1940	ENSG00000134571	47352957	47374253	-	inside	905	632	NearestLocation	MYBPC3
chr11	47373348	47373621	274	*	1940	LRG_386	47352957	47374253	-	inside	905	632	NearestLocation	NA
chr11	47374197	47374416	220	*	1941	ENSG00000134571	47352957	47374253	-	overlapStart	56	56	NearestLocation	MYBPC3
chr11	47374197	47374416	220	*	1941	LRG_386	47352957	47374253	-	overlapStart	56	56	NearestLocation	NA
chr11	47375789	47376008	220	*	1942	ENSG00000134571	47352957	47374253	-	upstream	-1536	1536	NearestLocation	MYBPC3
chr11	47375789	47376008	220	*	1942	LRG_386	47352957	47374253	-	upstream	-1536	1536	NearestLocation	NA
chr11	47546233	47546513	281	*	1943	ENSG00000270072	47535157	47536441	-	upstream	-9792	9792	NearestLocation	NA
chr11	47627533	47627831	299	*	1944	ENSG00000223187	47636450	47636546	-	downstream	9013	8619	NearestLocation	NA
chr11	47628275	47628520	246	*	1945	ENSG00000223187	47636450	47636546	-	downstream	8271	7930	NearestLocation	NA
chr11	47704115	47704392	278	*	1946	ENSG00000165923	47681143	47736941	-	inside	32826	22972	NearestLocation	AGBL2
chr11	47897458	47897790	333	*	1947	ENSG00000030066	47799639	47870107	-	upstream	-27351	27351	NearestLocation	NUP160
chr11	47938061	47938331	271	*	1948	ENSG00000254780	47926875	47927159	-	upstream	-10902	10902	NearestLocation	NA
chr11	47969769	47970031	263	*	1949	ENSG00000149177	48002113	48189670	+	upstream	-32344	32082	NearestLocation	PTPRJ
chr11	49457990	49458189	200	*	1950	ENSG00000226268	49455025	49455990	-	upstream	-2000	2000	NearestLocation	NA
chr11	49547932	49548216	285	*	1951	ENSG00000205035	49580098	49831971	+	upstream	-32166	31882	NearestLocation	LOC440040
chr11	55731072	55731343	272	*	1952	ENSG00000174970	55734975	55735990	-	downstream	4918	3632	NearestLocation	OR10AG1
chr11	55825298	55825722	425	*	1953	ENSG00000184741	55821840	55822779	+	downstream	3458	2519	NearestLocation	NA
chr11	56392145	56392397	253	*	1954	ENSG00000255172	56387255	56388286	-	upstream	-3859	3859	NearestLocation	OR5AM1P
chr11	56911983	56912360	378	*	1955	ENSG00000183908	56949221	56959191	+	upstream	-37238	36861	NearestLocation	LRRC55
chr11	57008308	57008509	202	*	1956	ENSG00000134817	57001051	57004709	-	upstream	-3599	3599	NearestLocation	APLNR
chr11	57294692	57294891	200	*	1957	ENSG00000134809	57295936	57298276	-	downstream	3584	1045	NearestLocation	TIMM10
chr11	57333474	57333732	259	*	1958	ENSG00000156587	57319129	57335757	-	inside	2283	2025	NearestLocation	UBE2L6
chr11	57407150	57407461	312	*	1959	ENSG00000208009	57408671	57408759	+	upstream	-1521	1210	NearestLocation	MIR130A
chr11	57545894	57546178	285	*	1960	ENSG00000198561	57520715	57587018	+	inside	25179	25179	NearestLocation	CTNND1
chr11	57745381	57745584	204	*	1961	ENSG00000254601	57772858	57773177	+	upstream	-27477	27274	NearestLocation	NA
chr11	57826526	57826739	214	*	1962	ENSG00000255146	57811582	57827610	-	inside	1084	871	NearestLocation	NA
chr11	58319549	58319767	219	*	1963	ENSG00000110031	58294344	58345693	-	inside	26144	25205	NearestLocation	LPXN
chr11	58779536	58779761	226	*	1964	ENSG00000254786	58762912	58767162	-	upstream	-12374	12374	NearestLocation	NA
chr11	59317982	59318245	264	*	1965	ENSG00000252893	59326273	59326334	+	upstream	-8291	8028	NearestLocation	NA
chr11	59318423	59318824	402	*	1966	ENSG00000252893	59326273	59326334	+	upstream	-7850	7449	NearestLocation	NA
chr11	59578164	59578363	200	*	1967	ENSG00000166902	59573608	59578345	-	overlapStart	181	18	NearestLocation	MRPL16
chr11	59727998	59728283	286	*	1968	ENSG00000214788	59705928	59712807	+	downstream	22070	15191	NearestLocation	NA
chr11	59898027	59898302	276	*	1969	ENSG00000254952	59927160	59928295	-	downstream	30268	28858	NearestLocation	NA
chr11	60107378	60107578	201	*	1970	ENSG00000166926	60102304	60164069	+	inside	5074	5074	NearestLocation	MS4A6E
chr11	60362744	60363023	280	*	1971	ENSG00000181995	60383209	60454622	+	upstream	-20465	20186	NearestLocation	LINC00301
chr11	60681362	60681625	264	*	1972	ENSG00000256944	60680638	60681524	-	overlapStart	162	101	NearestLocation	NA
chr11	60760642	60760841	200	*	1973	ENSG00000207153	60752533	60752639	-	upstream	-8003	8003	NearestLocation	RNU6-933P
chr11	61051877	61052089	213	*	1974	ENSG00000167992	61025762	61062896	-	inside	11019	10807	NearestLocation	VWCE
chr11	61213702	61213912	211	*	1975	ENSG00000240823	61211602	61211899	+	downstream	2100	1803	NearestLocation	RN7SL23P
chr11	61434498	61434731	234	*	1976	ENSG00000255947	61422137	61423174	-	upstream	-11324	11324	NearestLocation	NA
chr11	61522038	61522251	214	*	1977	ENSG00000124920	61520114	61555990	+	inside	1924	1924	NearestLocation	MYRF
chr11	61637338	61637602	265	*	1978	ENSG00000221968	61640991	61659523	-	downstream	22185	3389	NearestLocation	FADS3
chr11	61734052	61734330	279	*	1979	ENSG00000167996	61727190	61735132	-	inside	1080	802	NearestLocation	FTH1
chr11	62094219	62094637	419	*	1980	ENSG00000255213	62098418	62099285	+	upstream	-4199	3781	NearestLocation	NA
chr11	62148307	62148555	249	*	1981	ENSG00000265696	62140128	62140191	+	downstream	8179	8116	NearestLocation	NA
chr11	62275817	62276165	349	*	1982	ENSG00000250659	62304784	62309490	+	upstream	-28967	28619	NearestLocation	NA
chr11	62358999	62359308	310	*	1983	ENSG00000255508	62327075	62359003	-	overlapStart	4	4	NearestLocation	TUT1
chr11	62439088	62439332	245	*	1984	ENSG00000162194	62430287	62439727	-	inside	639	395	NearestLocation	LBHD1
chr11	62474120	62474319	200	*	1985	ENSG00000162188	62475130	62476673	+	upstream	-1010	811	NearestLocation	GNG3
chr11	62608814	62609426	613	*	1986	ENSG00000133316	62599814	62609281	-	overlapStart	467	145	NearestLocation	WDR74
chr11	62608814	62609426	613	*	1986	ENSG00000222328	62609091	62609281	-	includeFeature	467	145	NearestLocation	NA
chr11	62628018	62628257	240	*	1987	ENSG00000168003	62623518	62656352	+	inside	4500	4500	NearestLocation	SLC3A2
chr11	62657524	62657746	223	*	1988	ENSG00000257002	62677018	62685833	+	upstream	-19494	19272	NearestLocation	NA
chr11	62673369	62673707	339	*	1989	ENSG00000257002	62677018	62685833	+	upstream	-3649	3311	NearestLocation	NA
chr11	62687410	62687649	240	*	1990	ENSG00000168539	62676151	62689279	-	inside	1869	1630	NearestLocation	CHRM1
[truncated: 9,780 more rows]

## Sheet: GATA4_ChIP_day12
seqnames	start	end	width	strand	peak	feature	start_position	end_position	feature_strand	insideFeature	distancetoFeature	shortestDistance	fromOverlappingOrNearest	symbol
chr1	228398	228643	246	*	1	ENSG00000241670	228292	228775	-	inside	377	106	NearestLocation	NA
chr1	654146	654376	231	*	2	ENSG00000229376	657472	660283	+	upstream	-3326	3096	NearestLocation	NA
chr1	940461	940729	269	*	3	ENSG00000231702	943456	943609	-	downstream	3148	2727	NearestLocation	NA
chr1	1440283	1440763	481	*	4	ENSG00000197785	1447531	1470067	+	upstream	-7248	6768	NearestLocation	ATAD3A
chr1	1510328	1510563	236	*	5	ENSG00000215014	1510355	1511373	+	overlapStart	-27	27	NearestLocation	NA
chr1	1549591	1549790	200	*	6	ENSG00000197530	1550795	1565990	+	upstream	-1204	1005	NearestLocation	MIB2
chr1	1568889	1569133	245	*	7	ENSG00000189409	1567474	1570639	+	inside	1415	1415	NearestLocation	MMP23B
chr1	1632080	1632404	325	*	8	ENSG00000215914	1631369	1633249	+	inside	711	711	NearestLocation	MMP23A
chr1	1708625	1708826	202	*	9	ENSG00000008130	1682671	1711896	-	inside	3271	3070	NearestLocation	NADK
chr1	1778547	1778821	275	*	10	ENSG00000078369	1716729	1822495	-	inside	43948	43674	NearestLocation	GNB1
chr1	1814913	1815112	200	*	11	ENSG00000078369	1716729	1822495	-	inside	7582	7383	NearestLocation	GNB1
chr1	2036432	2036631	200	*	12	ENSG00000271806	2072523	2076718	-	downstream	40286	35892	NearestLocation	NA
chr1	2066847	2067216	370	*	13	ENSG00000271806	2072523	2076718	-	downstream	9871	5307	NearestLocation	NA
chr1	2262248	2262482	235	*	14	ENSG00000269753	2258581	2259042	+	downstream	3667	3206	NearestLocation	NA
chr1	3087587	3087881	295	*	15	ENSG00000226286	3049491	3050273	-	upstream	-37314	37314	NearestLocation	NA
chr1	3208792	3209204	413	*	16	ENSG00000272235	3223200	3226660	-	downstream	17868	13996	NearestLocation	NA
chr1	3244774	3245011	238	*	17	ENSG00000272235	3223200	3226660	-	upstream	-18114	18114	NearestLocation	NA
chr1	3246536	3246762	227	*	18	ENSG00000272235	3223200	3226660	-	upstream	-19876	19876	NearestLocation	NA
chr1	3265668	3266058	391	*	19	ENSG00000272235	3223200	3226660	-	upstream	-39008	39008	NearestLocation	NA
chr1	3310079	3310386	308	*	20	ENSG00000130762	3370990	3397677	+	upstream	-60911	60604	NearestLocation	ARHGEF16
chr1	3843345	3844028	684	*	21	ENSG00000236423	3816936	3833789	+	downstream	26409	9556	NearestLocation	LINC01134
chr1	4221876	4222084	209	*	22	ENSG00000229280	4235588	4235959	-	downstream	14083	13504	NearestLocation	EEF1DP6
chr1	4665320	4665624	305	*	23	ENSG00000232596	4631608	4643481	+	downstream	33712	21839	NearestLocation	LINC01646
chr1	5707321	5707526	206	*	24	ENSG00000236948	5647428	5728355	-	inside	21034	20829	NearestLocation	NA
chr1	5812380	5812737	358	*	25	ENSG00000216045	5875931	5876019	-	downstream	63639	63194	NearestLocation	NA
chr1	5831349	5831693	345	*	26	ENSG00000216045	5875931	5876019	-	downstream	44670	44238	NearestLocation	NA
chr1	6112626	6113093	468	*	27	ENSG00000268332	6100630	6101399	-	upstream	-11227	11227	NearestLocation	NA
chr1	6419718	6420070	353	*	28	ENSG00000271746	6453615	6454451	+	upstream	-33897	33545	NearestLocation	NA
chr1	6575909	6576245	337	*	29	ENSG00000171680	6526152	6580121	-	inside	4212	3876	NearestLocation	PLEKHG5
chr1	6583758	6584011	254	*	30	ENSG00000171680	6526152	6580121	-	upstream	-3637	3637	NearestLocation	PLEKHG5
chr1	6661031	6661271	241	*	31	ENSG00000116273	6673745	6684093	+	upstream	-12714	12474	NearestLocation	PHF13
chr1	6732629	6732998	370	*	32	ENSG00000007923	6694228	6761984	-	inside	29355	28986	NearestLocation	DNAJC11
chr1	6984993	6985214	222	*	33	ENSG00000237365	7068436	7074339	-	downstream	89346	83222	NearestLocation	NA
chr1	7577922	7578352	431	*	34	ENSG00000225126	7501156	7501614	-	upstream	-76308	76308	NearestLocation	NA
chr1	7614827	7615188	362	*	35	ENSG00000225126	7501156	7501614	-	upstream	-113213	113213	NearestLocation	NA
chr1	7678170	7678378	209	*	36	ENSG00000270171	7753184	7754904	-	downstream	76734	74806	NearestLocation	NA
chr1	7681946	7682153	208	*	37	ENSG00000270171	7753184	7754904	-	downstream	72958	71031	NearestLocation	NA
chr1	8064824	8065088	265	*	38	ENSG00000116285	8064464	8086368	-	inside	21544	360	NearestLocation	ERRFI1
chr1	8065273	8065565	293	*	39	ENSG00000116285	8064464	8086368	-	inside	21095	809	NearestLocation	ERRFI1
chr1	8075050	8075411	362	*	40	ENSG00000116285	8064464	8086368	-	inside	11318	10586	NearestLocation	ERRFI1
chr1	8196911	8197167	257	*	41	ENSG00000229305	8249884	8252830	+	upstream	-52973	52717	NearestLocation	LOC100129776
chr1	8427574	8427856	283	*	42	ENSG00000252254	8388127	8388239	+	downstream	39447	39335	NearestLocation	NA
chr1	8456226	8456590	365	*	43	ENSG00000232912	8484705	8494898	+	upstream	-28479	28115	NearestLocation	NA
chr1	8456918	8457324	407	*	44	ENSG00000232912	8484705	8494898	+	upstream	-27787	27381	NearestLocation	NA
chr1	8499267	8499466	200	*	45	ENSG00000232912	8484705	8494898	+	downstream	14562	4369	NearestLocation	NA
chr1	8602192	8602597	406	*	46	ENSG00000270282	8572712	8573080	+	downstream	29480	29112	NearestLocation	NA
chr1	8631705	8631904	200	*	47	ENSG00000270282	8572712	8573080	+	downstream	58993	58625	NearestLocation	NA
chr1	8686458	8686884	427	*	48	ENSG00000270282	8572712	8573080	+	downstream	113746	113378	NearestLocation	NA
chr1	8763399	8763729	331	*	49	ENSG00000234619	8810489	8811146	+	upstream	-47090	46760	NearestLocation	RPL7P11
chr1	8767006	8767393	388	*	50	ENSG00000234619	8810489	8811146	+	upstream	-43483	43096	NearestLocation	RPL7P11
chr1	8772421	8772727	307	*	51	ENSG00000234619	8810489	8811146	+	upstream	-38068	37762	NearestLocation	RPL7P11
chr1	8849532	8849867	336	*	52	ENSG00000224315	8846270	8846972	-	upstream	-2560	2560	NearestLocation	RPL7P7
chr1	9170903	9171357	455	*	53	ENSG00000180758	9160364	9189229	-	inside	18326	10539	NearestLocation	GPR157
chr1	9294215	9294514	300	*	54	ENSG00000049239	9294834	9331396	+	upstream	-619	320	NearestLocation	H6PD
chr1	9313765	9314107	343	*	55	ENSG00000049239	9294834	9331396	+	inside	18931	17289	NearestLocation	H6PD
chr1	9329885	9330312	428	*	56	ENSG00000252841	9338450	9338592	+	upstream	-8565	8138	NearestLocation	NA
chr1	9371598	9371806	209	*	57	ENSG00000171621	9352939	9429591	+	inside	18659	18659	NearestLocation	SPSB1
chr1	9470845	9471221	377	*	58	ENSG00000252956	9497728	9497837	-	downstream	26992	26507	NearestLocation	RNA5SP40
chr1	9869331	9869569	239	*	59	ENSG00000171603	9789084	9884584	-	inside	15253	15015	NearestLocation	CLSTN1
chr1	9946151	9946465	315	*	60	ENSG00000178585	9908334	9970394	-	inside	24243	23929	NearestLocation	CTNNBIP1
chr1	9960368	9960707	340	*	61	ENSG00000178585	9908334	9970394	-	inside	10026	9687	NearestLocation	CTNNBIP1
chr1	9982374	9982783	410	*	62	ENSG00000178585	9908334	9970394	-	upstream	-11980	11980	NearestLocation	CTNNBIP1
chr1	10215257	10215687	431	*	63	ENSG00000201746	10223326	10223432	+	upstream	-8069	7639	NearestLocation	RNU6-828P
chr1	10271889	10272298	410	*	64	ENSG00000054523	10270863	10441661	+	inside	1026	1026	NearestLocation	KIF1B
chr1	10397543	10397823	281	*	65	ENSG00000264501	10366523	10366813	+	downstream	31020	30730	NearestLocation	RN7SL731P
chr1	10588326	10588553	228	*	66	ENSG00000160049	10516579	10532583	-	upstream	-55743	55743	NearestLocation	DFFA
chr1	10846444	10846710	267	*	67	ENSG00000130940	10696661	10856707	-	inside	10263	9997	NearestLocation	CASZ1
chr1	10880549	10880776	228	*	68	ENSG00000130940	10696661	10856707	-	upstream	-23842	23842	NearestLocation	CASZ1
chr1	11217542	11217785	244	*	69	ENSG00000253086	11212407	11212509	+	downstream	5135	5033	NearestLocation	NA
chr1	11236326	11236525	200	*	70	ENSG00000271794	11229564	11229670	-	upstream	-6656	6656	NearestLocation	NA
chr1	11447537	11447785	249	*	71	ENSG00000224338	11485314	11485878	-	downstream	38341	37529	NearestLocation	MTCYBP45
chr1	11623663	11623901	239	*	72	ENSG00000235643	11669588	11673412	+	upstream	-45925	45687	NearestLocation	LINC01647
chr1	11850846	11851195	350	*	73	ENSG00000177553	11837134	11839676	-	upstream	-11170	11170	NearestLocation	C1orf167-AS1
chr1	11852759	11852977	219	*	74	ENSG00000177553	11837134	11839676	-	upstream	-13083	13083	NearestLocation	C1orf167-AS1
chr1	11907755	11908285	531	*	75	ENSG00000175206	11905766	11908402	-	inside	647	117	NearestLocation	NPPA
chr1	11918875	11919269	395	*	76	ENSG00000120937	11917521	11918988	-	overlapStart	113	113	NearestLocation	NPPB
chr1	11919675	11919911	237	*	77	ENSG00000120937	11917521	11918988	-	upstream	-687	687	NearestLocation	NPPB
chr1	11942895	11943512	618	*	78	ENSG00000224904	11937827	11940463	+	downstream	5068	2432	NearestLocation	SBF1P2
chr1	12039767	12040105	339	*	79	ENSG00000116688	12040238	12073571	+	upstream	-471	133	NearestLocation	MFN2
chr1	12039767	12040105	339	*	79	LRG_255	12040238	12073572	+	upstream	-471	133	NearestLocation	NA
chr1	12074740	12075309	570	*	80	ENSG00000270914	12077273	12077365	-	downstream	2625	1964	NearestLocation	NA
chr1	12098787	12099151	365	*	81	ENSG00000243539	12096799	12097071	-	upstream	-1716	1716	NearestLocation	RN7SL649P
chr1	12493750	12493985	236	*	82	ENSG00000239149	12567300	12567451	+	upstream	-73550	73315	NearestLocation	SNORA59B;SNORA59A
chr1	12532969	12533353	385	*	83	ENSG00000239149	12567300	12567451	+	upstream	-34331	33947	NearestLocation	SNORA59B;SNORA59A
chr1	12555769	12556033	265	*	84	ENSG00000239149	12567300	12567451	+	upstream	-11531	11267	NearestLocation	SNORA59B;SNORA59A
chr1	12664412	12664737	326	*	85	ENSG00000162496	12627939	12677737	-	inside	13325	13000	NearestLocation	DHRS3
chr1	14445774	14446230	457	*	86	ENSG00000252151	14450728	14450830	-	downstream	5056	4498	NearestLocation	RNU6-1265P
chr1	14763483	14763792	310	*	87	ENSG00000234593	14675450	14677518	-	upstream	-85965	85965	NearestLocation	KAZN-AS1
chr1	14944323	14944594	272	*	88	ENSG00000189337	14925200	15444539	+	inside	19123	19123	NearestLocation	KAZN
chr1	14976029	14976242	214	*	89	ENSG00000235829	15018625	15019109	-	downstream	43080	42383	NearestLocation	NA
chr1	15093750	15093995	246	*	90	ENSG00000235829	15018625	15019109	-	upstream	-74641	74641	NearestLocation	NA
chr1	15466283	15466658	376	*	91	ENSG00000175147	15442448	15478960	-	inside	12677	12302	NearestLocation	TMEM51-AS1
chr1	15477972	15478189	218	*	92	ENSG00000175147	15442448	15478960	-	inside	988	771	NearestLocation	TMEM51-AS1
chr1	15500343	15500542	200	*	93	ENSG00000204464	15490840	15497813	-	upstream	-2530	2530	NearestLocation	NA
chr1	15553180	15553529	350	*	94	ENSG00000142621	15573768	15726779	+	upstream	-20588	20239	NearestLocation	FHAD1
chr1	15770996	15771218	223	*	95	ENSG00000162438	15764935	15775737	+	inside	6061	4519	NearestLocation	CTRC
chr1	15819040	15819483	444	*	96	ENSG00000215704	15792404	15817895	+	downstream	26636	1145	NearestLocation	CELA2B
chr1	15870216	15870415	200	*	97	ENSG00000251866	15868660	15868799	+	downstream	1556	1417	NearestLocation	SCARNA21B
chr1	15930114	15930313	200	*	98	ENSG00000237301	15912631	15930121	-	overlapStart	7	7	NearestLocation	NA
chr1	16088230	16088429	200	*	99	ENSG00000162458	16083102	16113089	+	inside	5128	5128	NearestLocation	FBLIM1
chr1	16142131	16142339	209	*	100	ENSG00000233954	16133679	16134194	-	upstream	-7937	7937	NearestLocation	UQCRHL
chr1	16176422	16176696	275	*	101	ENSG00000179743	16160560	16174642	-	upstream	-1780	1780	NearestLocation	FLJ37453
chr1	16467425	16467781	357	*	102	ENSG00000227959	16481706	16483824	+	upstream	-14281	13925	NearestLocation	NA
chr1	16470326	16470667	342	*	103	ENSG00000227959	16481706	16483824	+	upstream	-11380	11039	NearestLocation	NA
chr1	16472300	16473006	707	*	104	ENSG00000227959	16481706	16483824	+	upstream	-9406	8700	NearestLocation	NA
chr1	16575239	16575438	200	*	105	ENSG00000233929	16567708	16567893	-	upstream	-7346	7346	NearestLocation	NA
chr1	16592963	16593397	435	*	106	ENSG00000233929	16567708	16567893	-	upstream	-25070	25070	NearestLocation	NA
chr1	16693384	16693666	283	*	107	ENSG00000226457	16695645	16696025	-	downstream	2641	1979	NearestLocation	RPL22P3
chr1	16833433	16833648	216	*	108	ENSG00000206652	16840617	16840780	-	downstream	7347	6969	NearestLocation	RNU1-1
chr1	16866997	16867345	349	*	109	ENSG00000268674	16865561	16866070	+	downstream	1436	927	NearestLocation	NA
chr1	16891007	16891479	473	*	110	ENSG00000225710	16875146	16879026	-	upstream	-11981	11981	NearestLocation	NA
chr1	16892520	16892811	292	*	111	ENSG00000225710	16875146	16879026	-	upstream	-13494	13494	NearestLocation	NA
chr1	16893063	16893856	794	*	112	ENSG00000225710	16875146	16879026	-	upstream	-14037	14037	NearestLocation	NA
chr1	16918347	16918558	212	*	113	ENSG00000219481	16888814	16940057	-	inside	21710	21499	NearestLocation	NBPF1
chr1	16971316	16971531	216	*	114	ENSG00000215908	16944751	16971178	-	upstream	-138	138	NearestLocation	CROCCP2
chr1	16993251	16993836	586	*	115	ENSG00000207513	16993280	16993443	-	includeFeature	192	29	NearestLocation	RNU1-3
chr1	17001385	17001920	536	*	116	ENSG00000237847	16999498	17000007	+	downstream	1887	1378	NearestLocation	NA
chr1	17058858	17059424	567	*	117	ENSG00000268991	17060447	17060956	-	downstream	2098	1023	NearestLocation	NA
chr1	17066741	17067197	457	*	118	ENSG00000207389	17067011	17067174	+	includeFeature	-270	23	NearestLocation	RNU1-4
chr1	17067319	17067579	261	*	119	ENSG00000207389	17067011	17067174	+	downstream	308	145	NearestLocation	RNU1-4
chr1	17080691	17081063	373	*	120	ENSG00000227684	17076728	17077459	+	downstream	3963	3232	NearestLocation	CROCCP4
chr1	17193581	17194025	445	*	121	ENSG00000228549	17197440	17200587	+	upstream	-3859	3415	NearestLocation	LOC112267871
chr1	17215926	17216319	394	*	122	ENSG00000238142	17215033	17216144	-	overlapStart	218	175	NearestLocation	LOC105376805
chr1	17222386	17223164	779	*	123	ENSG00000207005	17222475	17222638	+	includeFeature	-89	89	NearestLocation	RNU1-2
chr1	18201077	18201517	441	*	124	ENSG00000117148	18081808	18153558	+	downstream	119269	47519	NearestLocation	ACTL8
chr1	19229223	19229479	257	*	125	ENSG00000159423	19197926	19229275	-	overlapStart	52	52	NearestLocation	ALDH4A1
chr1	19379035	19379245	211	*	126	ENSG00000272084	19398604	19402005	-	downstream	22970	19359	NearestLocation	NA
chr1	19506333	19506532	200	*	127	ENSG00000127481	19401000	19536770	-	inside	30437	30238	NearestLocation	UBR4
chr1	19524342	19524700	359	*	128	ENSG00000127481	19401000	19536770	-	inside	12428	12070	NearestLocation	UBR4
chr1	19772453	19772653	201	*	129	ENSG00000240490	19750878	19751163	+	downstream	21575	21290	NearestLocation	NA
chr1	19775499	19775859	361	*	130	ENSG00000240490	19750878	19751163	+	downstream	24621	24336	NearestLocation	NA
chr1	20078651	20079147	497	*	131	ENSG00000162542	20008706	20126438	-	inside	47787	47291	NearestLocation	TMCO4
chr1	20097163	20097395	233	*	132	ENSG00000162542	20008706	20126438	-	inside	29275	29043	NearestLocation	TMCO4
chr1	20253671	20253883	213	*	133	ENSG00000188784	20246502	20250110	-	upstream	-3561	3561	NearestLocation	PLA2G2E
chr1	20268492	20268695	204	*	134	ENSG00000188784	20246502	20250110	-	upstream	-18382	18382	NearestLocation	PLA2G2E
chr1	20591919	20592151	233	*	135	ENSG00000228105	20569588	20571148	+	downstream	22331	20771	NearestLocation	LINC01757
chr1	20834641	20834878	238	*	136	ENSG00000090432	20825943	20834654	-	overlapStart	13	13	NearestLocation	MUL1
chr1	20987807	20988148	342	*	137	ENSG00000244038	20978270	20988000	-	overlapStart	193	148	NearestLocation	DDOST
chr1	21384654	21384958	305	*	138	ENSG00000236073	21400132	21400246	-	downstream	15592	15174	NearestLocation	NA
chr1	21564328	21564599	272	*	139	ENSG00000236936	21592575	21593744	+	upstream	-28247	27976	NearestLocation	NA
chr1	21588958	21589300	343	*	140	ENSG00000236936	21592575	21593744	+	upstream	-3617	3275	NearestLocation	NA
chr1	21647551	21647841	291	*	141	ENSG00000117298	21543740	21671997	-	inside	24446	24156	NearestLocation	ECE1
chr1	21812322	21812549	228	*	142	ENSG00000162551	21835858	21904905	+	upstream	-23536	23309	NearestLocation	ALPL
chr1	21864742	21865093	352	*	143	ENSG00000162551	21835858	21904905	+	inside	28884	28884	NearestLocation	ALPL
chr1	21958786	21959038	253	*	144	ENSG00000076864	21922708	21995801	-	inside	37015	36078	NearestLocation	RAP1GAP
chr1	22247137	22247613	477	*	145	ENSG00000232037	22234591	22235073	+	downstream	12546	12064	NearestLocation	RPL21P29
chr1	22351596	22351909	314	*	146	ENSG00000218510	22351681	22357716	+	overlapStart	-85	85	NearestLocation	LINC00339
chr1	22352186	22352658	473	*	147	ENSG00000218510	22351681	22357716	+	inside	505	505	NearestLocation	LINC00339
chr1	22357908	22358247	340	*	148	ENSG00000218510	22351681	22357716	+	downstream	6227	192	NearestLocation	LINC00339
chr1	22668665	22668864	200	*	149	ENSG00000234397	22649333	22649824	-	upstream	-18841	18841	NearestLocation	NA
chr1	22727137	22727426	290	*	150	ENSG00000184677	22778344	22857650	+	upstream	-51207	50918	NearestLocation	ZBTB40
chr1	22769077	22769286	210	*	151	ENSG00000184677	22778344	22857650	+	upstream	-9267	9058	NearestLocation	ZBTB40
chr1	22814371	22814616	246	*	152	ENSG00000237200	22843967	22846201	+	upstream	-29596	29351	NearestLocation	NA
chr1	22814977	22815250	274	*	153	ENSG00000237200	22843967	22846201	+	upstream	-28990	28717	NearestLocation	NA
chr1	22876382	22876595	214	*	154	ENSG00000070886	22890057	22930087	+	upstream	-13675	13462	NearestLocation	EPHA8
chr1	23038503	23038783	281	*	155	ENSG00000133216	23037332	23241818	+	inside	1171	1171	NearestLocation	EPHB2
chr1	23076826	23077417	592	*	156	ENSG00000216157	23075310	23075404	-	upstream	-1422	1422	NearestLocation	NA
chr1	23154227	23154432	206	*	157	ENSG00000225952	23162206	23163342	-	downstream	9115	7774	NearestLocation	NA
chr1	23345815	23346174	360	*	158	ENSG00000004487	23345941	23410182	+	overlapStart	-126	126	NearestLocation	KDM1A
chr1	23866362	23866680	319	*	159	ENSG00000007968	23832922	23857712	-	upstream	-8650	8650	NearestLocation	E2F2
chr1	23871322	23871604	283	*	160	ENSG00000235052	23875630	23877406	-	downstream	6084	4026	NearestLocation	NA
chr1	23882539	23882738	200	*	161	ENSG00000117318	23884409	23886285	-	downstream	3746	1671	NearestLocation	ID3
chr1	23903992	23904216	225	*	162	ENSG00000197880	23907985	23967058	+	upstream	-3993	3769	NearestLocation	MDS2
chr1	24104339	24104776	438	*	163	ENSG00000236810	24086872	24104777	-	inside	438	1	NearestLocation	ELOA-AS1
chr1	24477865	24478204	340	*	164	ENSG00000142677	24446261	24469611	-	upstream	-8254	8254	NearestLocation	IL22RA1
chr1	24525821	24526203	383	*	165	ENSG00000230023	24526730	24538183	+	upstream	-909	527	NearestLocation	LINC02800
chr1	25020815	25021292	478	*	166	ENSG00000238986	24993474	24993578	-	upstream	-27237	27237	NearestLocation	NA
chr1	25174617	25174953	337	*	167	ENSG00000238482	25104364	25104470	-	upstream	-70147	70147	NearestLocation	RNU6-1208P
chr1	25576643	25576916	274	*	168	ENSG00000272432	25574328	25574812	+	downstream	2315	1831	NearestLocation	NA
chr1	25649417	25649696	280	*	169	ENSG00000259984	25662920	25663956	-	downstream	14539	13224	NearestLocation	NA
chr1	25694711	25695012	302	*	170	ENSG00000238889	25672765	25672868	-	upstream	-21843	21843	NearestLocation	NA
chr1	25800952	25801269	318	*	171	ENSG00000204178	25757388	25826700	+	inside	43564	25431	NearestLocation	MACO1
chr1	25962708	25963071	364	*	172	ENSG00000117643	25943959	26112698	+	inside	18749	18749	NearestLocation	MAN1C1
chr1	26021689	26022080	392	*	173	ENSG00000233478	25971035	25985602	-	upstream	-36087	36087	NearestLocation	NA
chr1	26054269	26055050	782	*	174	ENSG00000233478	25971035	25985602	-	upstream	-68667	68667	NearestLocation	NA
chr1	26087206	26087475	270	*	175	ENSG00000162430	26126667	26144713	+	upstream	-39461	39192	NearestLocation	SELENON
chr1	26111252	26111531	280	*	176	ENSG00000162430	26126667	26144713	+	upstream	-15415	15136	NearestLocation	SELENON
chr1	26144536	26144753	218	*	177	ENSG00000117640	26145131	26159432	+	upstream	-595	378	NearestLocation	MTFR1L
chr1	26317312	26317626	315	*	178	ENSG00000158006	26286258	26324648	-	inside	7336	7022	NearestLocation	PAFAH2
chr1	26324557	26324982	426	*	179	ENSG00000158006	26286258	26324648	-	overlapStart	91	91	NearestLocation	PAFAH2
chr1	26393340	26393693	354	*	180	ENSG00000158022	26377795	26394927	-	inside	1587	1234	NearestLocation	TRIM63
chr1	26420698	26421260	563	*	181	ENSG00000175087	26437664	26452034	+	upstream	-16966	16404	NearestLocation	PDIK1L
chr1	26536954	26537291	338	*	182	ENSG00000236155	26536232	26556331	+	inside	722	722	NearestLocation	ZPLD2P
chr1	26745615	26745887	273	*	183	ENSG00000131914	26737269	26756213	+	inside	8346	8346	NearestLocation	LIN28A
chr1	26758470	26758984	515	*	184	ENSG00000117682	26758773	26797785	+	overlapStart	-303	211	NearestLocation	DHDDS
chr1	26947147	26947634	488	*	185	ENSG00000229247	26966868	26967105	-	downstream	19958	19234	NearestLocation	NA
chr1	26962350	26962592	243	*	186	ENSG00000229247	26966868	26967105	-	downstream	4755	4276	NearestLocation	NA
chr1	27019389	27019798	410	*	187	ENSG00000260063	27018623	27020622	-	inside	1233	766	NearestLocation	LOC101928728
chr1	27024758	27025037	280	*	188	ENSG00000117713	27022524	27108595	+	inside	2234	2234	NearestLocation	ARID1A
chr1	27049837	27050200	364	*	189	ENSG00000117713	27022524	27108595	+	inside	27313	27313	NearestLocation	ARID1A
chr1	27216510	27216820	311	*	190	ENSG00000142751	27202624	27216788	-	overlapStart	278	32	NearestLocation	GPN2
chr1	27240601	27240959	359	*	191	ENSG00000131910	27237980	27240457	-	upstream	-144	144	NearestLocation	NR0B2
chr1	27560961	27561180	220	*	192	ENSG00000142784	27561007	27635110	+	overlapStart	-46	46	NearestLocation	WDTC1
chr1	27869238	27869532	295	*	193	ENSG00000237429	27852316	27857072	+	downstream	16922	12166	NearestLocation	NA
chr1	27982833	27983128	296	*	194	ENSG00000233975	27986839	27989233	-	downstream	6400	3711	NearestLocation	LINC02574
chr1	28143757	28144230	474	*	195	ENSG00000270031	28146494	28146852	+	upstream	-2737	2264	NearestLocation	NA
chr1	28241193	28241527	335	*	196	ENSG00000117748	28218035	28241257	-	overlapStart	64	64	NearestLocation	RPA2
chr1	28851576	28851825	250	*	197	ENSG00000231468	28852830	28853739	-	downstream	2163	1005	NearestLocation	NA
chr1	28864349	28864642	294	*	198	ENSG00000231468	28852830	28853739	-	upstream	-10610	10610	NearestLocation	NA
chr1	28931660	28931864	205	*	199	ENSG00000188060	28918712	28921955	+	downstream	12948	9705	NearestLocation	RAB42
chr1	28974878	28975142	265	*	200	ENSG00000270103	28975112	28975245	+	overlapStart	-234	30	NearestLocation	NA
chr1	29370211	29370901	691	*	201	ENSG00000206704	29312222	29312322	+	downstream	57989	57889	NearestLocation	NA
chr1	29483121	29483856	736	*	202	ENSG00000227637	29479001	29479503	+	downstream	4120	3618	NearestLocation	NA
chr1	29524225	29524424	200	*	203	ENSG00000116350	29474255	29508499	-	upstream	-15726	15726	NearestLocation	SRSF4
chr1	29686171	29686522	352	*	204	ENSG00000230523	29656132	29676626	-	upstream	-9545	9545	NearestLocation	LINC01756
chr1	30339563	30339824	262	*	205	ENSG00000222787	30357749	30357852	+	upstream	-18186	17925	NearestLocation	NA
chr1	30435152	30435422	271	*	206	ENSG00000270927	30377712	30378204	-	upstream	-56948	56948	NearestLocation	NA
chr1	30469584	30469836	253	*	207	ENSG00000233399	30486799	30510459	-	downstream	40875	16963	NearestLocation	LINC01648
chr1	30601780	30602204	425	*	208	ENSG00000233372	30613110	30614454	+	upstream	-11330	10906	NearestLocation	NA
chr1	31170744	31171013	270	*	209	ENSG00000186056	31191351	31199674	+	upstream	-20607	20338	NearestLocation	MATN1-AS1
chr1	31180803	31181196	394	*	210	ENSG00000186056	31191351	31199674	+	upstream	-10548	10155	NearestLocation	MATN1-AS1
chr1	31282269	31282713	445	*	211	ENSG00000229607	31283225	31288400	-	downstream	6131	512	NearestLocation	NA
chr1	31437645	31437944	300	*	212	ENSG00000200181	31441011	31441083	-	downstream	3438	3067	NearestLocation	NA
chr1	31538133	31538531	399	*	213	ENSG00000134644	31404353	31538838	-	inside	705	307	NearestLocation	PUM1
chr1	31747778	31748097	320	*	214	ENSG00000229447	31736092	31736528	-	upstream	-11250	11250	NearestLocation	NA
chr1	32014659	32015097	439	*	215	ENSG00000229167	32037186	32041174	-	downstream	26515	22089	NearestLocation	NA
chr1	32028608	32028955	348	*	216	ENSG00000229167	32037186	32041174	-	downstream	12566	8231	NearestLocation	NA
chr1	32213990	32214341	352	*	217	ENSG00000266580	32224261	32224336	-	downstream	10346	9920	NearestLocation	MIR4254
chr1	32216867	32217078	212	*	218	ENSG00000266580	32224261	32224336	-	downstream	7469	7183	NearestLocation	MIR4254
chr1	32235758	32235993	236	*	219	ENSG00000121753	32192718	32230494	-	upstream	-5264	5264	NearestLocation	ADGRB2
chr1	32409923	32410243	321	*	220	ENSG00000184007	32372022	32410457	-	inside	534	214	NearestLocation	PTP4A2
chr1	32420539	32420824	286	*	221	ENSG00000184007	32372022	32410457	-	upstream	-10082	10082	NearestLocation	PTP4A2
chr1	32860250	32860517	268	*	222	ENSG00000160058	32830704	32860332	-	overlapStart	82	82	NearestLocation	BSDC1
chr1	32959868	32960218	351	*	223	ENSG00000273274	32930670	32962287	+	inside	29198	2069	NearestLocation	ZBTB8B
chr1	33109768	33110022	255	*	224	ENSG00000200591	33105552	33105653	+	downstream	4216	4115	NearestLocation	NA
chr1	33115876	33116265	390	*	225	ENSG00000176261	33065773	33116504	-	inside	628	239	NearestLocation	ZBTB8OS
chr1	33224347	33224755	409	*	226	ENSG00000162522	33207486	33240571	+	inside	16861	15816	NearestLocation	KIAA1522
chr1	33269398	33269598	201	*	227	ENSG00000116497	33282368	33324476	+	upstream	-12970	12770	NearestLocation	S100PBP
chr1	33272554	33272872	319	*	228	ENSG00000116497	33282368	33324476	+	upstream	-9814	9496	NearestLocation	S100PBP
chr1	33399656	33399877	222	*	229	ENSG00000221423	33391895	33392000	+	downstream	7761	7656	NearestLocation	NA
chr1	33413384	33413607	224	*	230	ENSG00000116514	33402046	33430286	-	inside	16902	11338	NearestLocation	RNF19B
chr1	33475246	33475567	322	*	231	ENSG00000236065	33452676	33498070	+	inside	22570	22503	NearestLocation	NA
chr1	33502457	33502812	356	*	232	LRG_133	33473586	33502492	-	overlapStart	35	35	NearestLocation	NA
chr1	33520862	33521063	202	*	233	LRG_133	33473586	33502492	-	upstream	-18370	18370	NearestLocation	NA
chr1	33592950	33593336	387	*	234	ENSG00000142920	33546705	33586131	+	downstream	46245	6819	NearestLocation	AZIN2
chr1	33686660	33686900	241	*	235	ENSG00000160094	33722146	33766320	+	upstream	-35486	35246	NearestLocation	ZNF362
chr1	33804676	33804966	291	*	236	ENSG00000222112	33802167	33802465	-	upstream	-2211	2211	NearestLocation	RN7SKP16
chr1	34368071	34368531	461	*	237	ENSG00000231163	34334554	34351059	+	downstream	33517	17012	NearestLocation	CSMD2-AS1
chr1	35291230	35291429	200	*	238	ENSG00000230163	35316295	35317156	+	upstream	-25065	24866	NearestLocation	NA
chr1	35309201	35309588	388	*	239	ENSG00000230163	35316295	35317156	+	upstream	-7094	6707	NearestLocation	NA
chr1	35318335	35318679	345	*	240	ENSG00000230163	35316295	35317156	+	downstream	2040	1179	NearestLocation	NA
chr1	36084933	36085193	261	*	241	ENSG00000126067	36067185	36107445	-	inside	22512	17748	NearestLocation	PSMB2
chr1	36383226	36383561	336	*	242	ENSG00000271914	36395321	36395716	-	downstream	12490	11760	NearestLocation	NA
chr1	36705934	36706249	316	*	243	ENSG00000231849	36707499	36707757	-	downstream	1823	1250	NearestLocation	UBE2V2P4
chr1	36738172	36738451	280	*	244	ENSG00000231849	36707499	36707757	-	upstream	-30415	30415	NearestLocation	UBE2V2P4
chr1	36851590	36851885	296	*	245	ENSG00000196182	36805225	36851497	-	upstream	-93	93	NearestLocation	STK40
chr1	36955006	36955401	396	*	246	LRG_144	36931644	36948915	-	upstream	-6091	6091	NearestLocation	NA
chr1	37276542	37276844	303	*	247	ENSG00000234481	37238741	37241369	+	downstream	37801	35173	NearestLocation	NA
chr1	37281950	37282241	292	*	248	ENSG00000234481	37238741	37241369	+	downstream	43209	40581	NearestLocation	NA
chr1	37389922	37390129	208	*	249	ENSG00000163873	37261128	37499730	-	inside	109808	109601	NearestLocation	GRIK3
chr1	39234295	39234581	287	*	250	ENSG00000215895	39174603	39176562	+	downstream	59692	57733	NearestLocation	HSPA5P1
chr1	39565956	39566269	314	*	251	ENSG00000127603	39546988	39952849	+	inside	18968	18968	NearestLocation	MACF1
chr1	39670145	39670767	623	*	252	ENSG00000270040	39672184	39672629	+	upstream	-2039	1417	NearestLocation	NA
chr1	39679454	39680313	860	*	253	ENSG00000270040	39672184	39672629	+	downstream	7270	6825	NearestLocation	NA
chr1	39741871	39742204	334	*	254	ENSG00000226438	39715510	39723321	-	upstream	-18550	18550	NearestLocation	NA
chr1	40034887	40035156	270	*	255	ENSG00000201457	40033046	40033180	-	upstream	-1707	1707	NearestLocation	SNORA55
chr1	40036830	40037099	270	*	256	ENSG00000201457	40033046	40033180	-	upstream	-3650	3650	NearestLocation	SNORA55
chr1	40039982	40040299	318	*	257	ENSG00000090621	40026488	40042462	-	inside	2480	2163	NearestLocation	PABPC4
chr1	40167590	40167800	211	*	258	ENSG00000084072	40157854	40229586	+	inside	9736	9736	NearestLocation	PPIE
chr1	40358463	40358953	491	*	259	ENSG00000236546	40363417	40364770	+	upstream	-4954	4464	NearestLocation	MYCL-AS1
chr1	40436759	40437154	396	*	260	ENSG00000228477	40428352	40429076	+	downstream	8407	7683	NearestLocation	NA
chr1	40442552	40442796	245	*	261	ENSG00000228477	40428352	40429076	+	downstream	14200	13476	NearestLocation	NA
chr1	40723155	40723887	733	*	262	ENSG00000084073	40723779	40759856	+	overlapStart	-624	108	NearestLocation	ZMPSTE24
chr1	41051149	41051489	341	*	263	ENSG00000233910	41059305	41060025	-	downstream	8876	7816	NearestLocation	GTF2F2P2
chr1	41124838	41125151	314	*	264	ENSG00000117016	41086351	41131329	-	inside	6491	6178	NearestLocation	RIMS3
chr1	41174786	41175144	359	*	265	ENSG00000272145	41156052	41157738	-	upstream	-17048	17048	NearestLocation	NA
chr1	41329140	41329514	375	*	266	ENSG00000229528	41329586	41342342	+	upstream	-446	72	NearestLocation	NA
chr1	41329721	41329953	233	*	267	ENSG00000229528	41329586	41342342	+	inside	135	135	NearestLocation	NA
chr1	41442692	41442983	292	*	268	ENSG00000171793	41445007	41478235	+	upstream	-2315	2024	NearestLocation	CTPS1
chr1	41616651	41617067	417	*	269	ENSG00000215893	41564310	41564808	+	downstream	52341	51843	NearestLocation	NA
chr1	41771565	41771843	279	*	270	ENSG00000213987	41730222	41730534	-	upstream	-41031	41031	NearestLocation	NA
chr1	41853526	41853780	255	*	271	ENSG00000229901	41840676	41841341	-	upstream	-12185	12185	NearestLocation	FOXO6-AS1
chr1	41901346	41901678	333	*	272	ENSG00000252563	41932608	41932699	-	downstream	31353	30930	NearestLocation	RNA5SP45
chr1	41966582	41966841	260	*	273	ENSG00000127129	41944446	41950344	-	upstream	-16238	16238	NearestLocation	EDN2
chr1	41969906	41970229	324	*	274	ENSG00000127129	41944446	41950344	-	upstream	-19562	19562	NearestLocation	EDN2
chr1	42233245	42233489	245	*	275	ENSG00000264896	42224812	42224898	+	downstream	8433	8347	NearestLocation	NA
chr1	42342384	42342583	200	*	276	ENSG00000264896	42224812	42224898	+	downstream	117572	117486	NearestLocation	NA
chr1	43123717	43123976	260	*	277	ENSG00000171960	43124096	43142429	+	upstream	-379	120	NearestLocation	PPIH
chr1	43147766	43148100	335	*	278	ENSG00000065978	43148098	43168020	+	overlapStart	-332	2	NearestLocation	YBX1
chr1	43457893	43458211	319	*	279	ENSG00000207256	43457109	43457215	+	downstream	784	678	NearestLocation	RNU6-880P
chr1	43672332	43672925	594	*	280	ENSG00000199240	43662088	43662207	+	downstream	10244	10125	NearestLocation	RNA5SP46
chr1	43800391	43800644	254	*	281	LRG_510	43803475	43820135	+	upstream	-3084	2831	NearestLocation	NA
chr1	43809919	43810193	275	*	282	ENSG00000117400	43803478	43818443	+	inside	6441	6441	NearestLocation	MPL
chr1	43941699	43941988	290	*	283	ENSG00000178922	43916824	43919660	-	upstream	-22039	22039	NearestLocation	HYI
chr1	44013104	44013320	217	*	284	ENSG00000142949	43990858	44089343	+	inside	22246	22246	NearestLocation	PTPRF
chr1	44229247	44229455	209	*	285	ENSG00000233674	44209142	44209412	+	downstream	20105	19835	NearestLocation	NA
chr1	44253357	44253564	208	*	286	ENSG00000233674	44209142	44209412	+	downstream	44215	43945	NearestLocation	NA
chr1	44527666	44528008	343	*	287	ENSG00000230615	44501798	44570647	+	inside	25868	25868	NearestLocation	NA
chr1	44706875	44707217	343	*	288	ENSG00000233602	44709080	44709945	-	downstream	3070	1863	NearestLocation	ERI3-IT1
chr1	44715933	44716184	252	*	289	ENSG00000233602	44709080	44709945	-	upstream	-5988	5988	NearestLocation	ERI3-IT1
chr1	44756198	44756779	582	*	290	ENSG00000252146	44798777	44798850	-	downstream	42652	41998	NearestLocation	NA
chr1	44782031	44782320	290	*	291	ENSG00000252146	44798777	44798850	-	downstream	16819	16457	NearestLocation	NA
chr1	44870762	44870974	213	*	292	ENSG00000187147	44870866	45117396	+	overlapStart	-104	104	NearestLocation	RNF220
chr1	44997804	44998215	412	*	293	ENSG00000263381	45011165	45011224	+	upstream	-13361	12950	NearestLocation	MIR5584
chr1	45196596	45197013	418	*	294	ENSG00000200169	45196727	45196842	-	includeFeature	246	131	NearestLocation	RNU5D-1
chr1	45240912	45241111	200	*	295	ENSG00000142937	45240923	45244451	+	overlapStart	-11	11	NearestLocation	RPS8
chr1	45267783	45268191	409	*	296	ENSG00000173846	45265897	45271662	+	inside	1886	1886	NearestLocation	PLK3
chr1	45285013	45285305	293	*	297	ENSG00000202444	45285555	45285669	-	downstream	656	250	NearestLocation	RNU5E-6P
chr1	45285640	45285930	291	*	298	ENSG00000202444	45285555	45285669	-	overlapStart	29	29	NearestLocation	RNU5E-6P
chr1	46009344	46009544	201	*	299	ENSG00000117448	46016215	46035721	+	upstream	-6871	6671	NearestLocation	AKR1A1
chr1	46153138	46153358	221	*	300	ENSG00000159596	46152886	46160115	+	inside	252	252	NearestLocation	TMEM69
chr1	46379200	46379407	208	*	301	ENSG00000232467	46312666	46313266	-	upstream	-65934	65934	NearestLocation	NA
chr1	46492345	46492555	211	*	302	ENSG00000226957	46512490	46514040	+	upstream	-20145	19935	NearestLocation	NA
chr1	46676789	46677052	264	*	303	ENSG00000171357	46669006	46686933	+	inside	7783	7783	NearestLocation	LURAP1
chr1	46750501	46750912	412	*	304	ENSG00000132128	46726868	46769280	-	inside	18779	18368	NearestLocation	LRRC41
chr1	46764154	46764374	221	*	305	ENSG00000132128	46726868	46769280	-	inside	5126	4906	NearestLocation	LRRC41
chr1	46861839	46862153	315	*	306	ENSG00000117480	46859937	46879520	+	inside	1902	1902	NearestLocation	FAAH
chr1	46908353	46908680	328	*	307	ENSG00000224863	46912345	46915376	-	downstream	7023	3665	NearestLocation	LINC01398
chr1	46939626	46939891	266	*	308	ENSG00000225667	46921495	46948147	+	inside	18131	8256	NearestLocation	NA
chr1	47138436	47138682	247	*	309	ENSG00000123472	47098409	47139539	-	inside	1103	857	NearestLocation	ATPAF1
chr1	47233414	47233734	321	*	310	ENSG00000142973	47223510	47285085	+	inside	9904	9904	NearestLocation	CYP4B1
chr1	47957008	47957280	273	*	311	ENSG00000229554	47963566	47964013	-	downstream	7005	6286	NearestLocation	RPL21P24
chr1	48017654	48017911	258	*	312	ENSG00000227883	48015868	48016425	+	downstream	1786	1229	NearestLocation	ATP6V0E1P4
chr1	48053736	48054030	295	*	313	ENSG00000221447	48086765	48086849	-	downstream	33113	32735	NearestLocation	NA
chr1	48342021	48342259	239	*	314	ENSG00000225028	48283738	48285909	+	downstream	58283	56112	NearestLocation	NA
chr1	48363974	48364238	265	*	315	ENSG00000225028	48283738	48285909	+	downstream	80236	78065	NearestLocation	NA
chr1	48452507	48452743	237	*	316	ENSG00000269113	48226200	48462567	-	inside	10060	9824	NearestLocation	TRABD2B
chr1	48457624	48457823	200	*	317	ENSG00000269113	48226200	48462567	-	inside	4943	4744	NearestLocation	TRABD2B
chr1	48472783	48472985	203	*	318	ENSG00000269113	48226200	48462567	-	upstream	-10216	10216	NearestLocation	TRABD2B
chr1	48514592	48514903	312	*	319	ENSG00000226133	48519217	48532873	+	upstream	-4625	4314	NearestLocation	NA
chr1	48515894	48516246	353	*	320	ENSG00000226133	48519217	48532873	+	upstream	-3323	2971	NearestLocation	NA
chr1	48702573	48702800	228	*	321	ENSG00000272491	48693560	48695233	-	upstream	-7340	7340	NearestLocation	NA
chr1	48963797	48964059	263	*	322	ENSG00000232514	48962935	48963408	-	upstream	-389	389	NearestLocation	RPL21P25
chr1	48996450	48996651	202	*	323	ENSG00000232514	48962935	48963408	-	upstream	-33042	33042	NearestLocation	RPL21P25
chr1	49006248	49006538	291	*	324	ENSG00000232514	48962935	48963408	-	upstream	-42840	42840	NearestLocation	RPL21P25
chr1	49036315	49036569	255	*	325	ENSG00000232514	48962935	48963408	-	upstream	-72907	72907	NearestLocation	RPL21P25
chr1	49120202	49120501	300	*	326	ENSG00000162373	49193195	49242641	-	downstream	122439	72694	NearestLocation	BEND5
chr1	49142625	49142927	303	*	327	ENSG00000162373	49193195	49242641	-	downstream	100016	50268	NearestLocation	BEND5
chr1	49174586	49174883	298	*	328	ENSG00000162373	49193195	49242641	-	downstream	68055	18312	NearestLocation	BEND5
chr1	50646640	50646839	200	*	329	ENSG00000237337	50639978	50641540	-	upstream	-5100	5100	NearestLocation	NA
chr1	51120673	51121021	349	*	330	ENSG00000207194	51048076	51048183	+	downstream	72597	72490	NearestLocation	RNU6-1026P
chr1	51186211	51186410	200	*	331	ENSG00000252825	51215968	51216025	+	upstream	-29757	29558	NearestLocation	NA
chr1	51792090	51792429	340	*	332	ENSG00000261664	51795326	51800996	+	upstream	-3236	2897	NearestLocation	TTC39A-AS1
chr1	51889022	51889478	457	*	333	ENSG00000238140	51927393	51929088	+	upstream	-38371	37915	NearestLocation	NA
chr1	51953344	51953607	264	*	334	ENSG00000238140	51927393	51929088	+	downstream	25951	24256	NearestLocation	NA
chr1	51983698	51983907	210	*	335	ENSG00000227070	51983981	52027301	+	upstream	-283	74	NearestLocation	NA
chr1	52113824	52114345	522	*	336	ENSG00000227742	52027538	52060569	-	upstream	-53255	53255	NearestLocation	NA
chr1	52155412	52155698	287	*	337	ENSG00000236973	52172810	52173809	-	downstream	18397	17112	NearestLocation	GAPDHP51
chr1	52250706	52251125	420	*	338	ENSG00000266993	52259637	52264824	+	upstream	-8931	8512	NearestLocation	LOC105378721
chr1	52431696	52431993	298	*	339	ENSG00000200839	52439082	52439207	+	upstream	-7386	7089	NearestLocation	RNA5SP48
chr1	52432308	52432547	240	*	340	ENSG00000200839	52439082	52439207	+	upstream	-6774	6535	NearestLocation	RNA5SP48
chr1	53018314	53018613	300	*	341	ENSG00000134744	52873954	53019159	-	inside	845	546	NearestLocation	TUT4
chr1	53168929	53169149	221	*	342	ENSG00000162377	53152508	53164038	-	upstream	-4891	4891	NearestLocation	COA7
chr1	53192654	53192997	344	*	343	ENSG00000162378	53192126	53293014	+	inside	528	528	NearestLocation	ZYG11B
chr1	53476901	53477337	437	*	344	ENSG00000226147	53460398	53461698	+	downstream	16503	15203	NearestLocation	NA
chr1	53581674	53581883	210	*	345	ENSG00000235563	53580248	53584281	+	inside	1426	1426	NearestLocation	NA
chr1	53582961	53583252	292	*	346	ENSG00000235563	53580248	53584281	+	inside	2713	1029	NearestLocation	NA
chr1	53611903	53612156	254	*	347	ENSG00000162383	53552855	53608289	-	upstream	-3614	3614	NearestLocation	SLC1A7
chr1	53832813	53833349	537	*	348	ENSG00000230138	53832340	53833917	-	inside	1104	473	NearestLocation	NA
chr1	53845863	53846207	345	*	349	ENSG00000230138	53832340	53833917	-	upstream	-11946	11946	NearestLocation	NA
chr1	53978276	53978498	223	*	350	ENSG00000143006	53925072	53933161	+	downstream	53204	45115	NearestLocation	DMRTB1
chr1	53985097	53985393	297	*	351	ENSG00000143006	53925072	53933161	+	downstream	60025	51936	NearestLocation	DMRTB1
chr1	54015032	54015272	241	*	352	ENSG00000143006	53925072	53933161	+	downstream	89960	81871	NearestLocation	DMRTB1
chr1	54423003	54423318	316	*	353	ENSG00000116212	54411750	54433841	+	inside	11253	10523	NearestLocation	LRRC42
chr1	54665893	54666255	363	*	354	ENSG00000256407	54606897	54665746	-	upstream	-147	147	NearestLocation	NA
chr1	54711739	54712324	586	*	355	ENSG00000198711	54703710	54704736	+	downstream	8029	7003	NearestLocation	SSBP3-AS1
chr1	54730279	54730617	339	*	356	ENSG00000225632	54751078	54753044	+	upstream	-20799	20461	NearestLocation	NA
chr1	54771772	54772128	357	*	357	ENSG00000225632	54751078	54753044	+	downstream	20694	18728	NearestLocation	NA
chr1	54821694	54821984	291	*	358	ENSG00000157216	54691105	54879152	-	inside	57458	57168	NearestLocation	SSBP3
chr1	54851382	54851596	215	*	359	ENSG00000157216	54691105	54879152	-	inside	27770	27556	NearestLocation	SSBP3
chr1	54868714	54868935	222	*	360	ENSG00000157216	54691105	54879152	-	inside	10438	10217	NearestLocation	SSBP3
chr1	54937250	54937645	396	*	361	ENSG00000265404	54970341	54970443	+	upstream	-33091	32696	NearestLocation	NA
chr1	55352562	55352851	290	*	362	ENSG00000242396	55352548	55353674	+	inside	14	14	NearestLocation	NA
chr1	55606216	55606420	205	*	363	ENSG00000162402	55532032	55680786	-	inside	74570	74184	NearestLocation	USP24
chr1	56139136	56139393	258	*	364	ENSG00000234810	56046710	56200675	+	inside	92426	61282	NearestLocation	NA
chr1	56159946	56160378	433	*	365	ENSG00000234810	56046710	56200675	+	inside	113236	40297	NearestLocation	NA
chr1	56404288	56404528	241	*	366	ENSG00000227104	56404387	56404953	-	overlapEnd	665	99	NearestLocation	PIGQP1
chr1	56420895	56421111	217	*	367	ENSG00000233079	56410760	56415792	+	downstream	10135	5103	NearestLocation	LINC01755
chr1	56425010	56425283	274	*	368	ENSG00000233079	56410760	56415792	+	downstream	14250	9218	NearestLocation	LINC01755
chr1	56558928	56559261	334	*	369	ENSG00000235612	56611393	56620896	+	upstream	-52465	52132	NearestLocation	NA
chr1	56636622	56637102	481	*	370	ENSG00000235612	56611393	56620896	+	downstream	25229	15726	NearestLocation	NA
chr1	56701824	56702156	333	*	371	ENSG00000260971	56713966	56724243	-	downstream	22419	11810	NearestLocation	NA
chr1	56821324	56821544	221	*	372	ENSG00000223307	56843005	56843090	-	downstream	21766	21461	NearestLocation	NA
chr1	56865081	56865353	273	*	373	ENSG00000223956	56880635	56881638	+	upstream	-15554	15282	NearestLocation	LINC01767
chr1	56919367	56919674	308	*	374	ENSG00000223956	56880635	56881638	+	downstream	38732	37729	NearestLocation	LINC01767
chr1	56959973	56960317	345	*	375	ENSG00000236776	57004124	57004583	+	upstream	-44151	43807	NearestLocation	RPL21P23
chr1	57276966	57277331	366	*	376	ENSG00000187889	57184477	57285369	-	inside	8403	8038	NearestLocation	FYB2
chr1	57532704	57533243	540	*	377	ENSG00000221591	57431953	57432035	+	downstream	100751	100669	NearestLocation	NA
chr1	57684500	57684736	237	*	378	ENSG00000227935	57852248	57853122	+	upstream	-167748	167512	NearestLocation	NA
chr1	57747133	57747416	284	*	379	ENSG00000227935	57852248	57853122	+	upstream	-105115	104832	NearestLocation	NA
chr1	57828186	57828527	342	*	380	ENSG00000227935	57852248	57853122	+	upstream	-24062	23721	NearestLocation	NA
chr1	58188032	58188597	566	*	381	ENSG00000238773	58222756	58222848	+	upstream	-34724	34159	NearestLocation	NA
chr1	58227368	58227567	200	*	382	ENSG00000238773	58222756	58222848	+	downstream	4612	4520	NearestLocation	NA
chr1	58541064	58541329	266	*	383	ENSG00000230546	58550091	58550231	+	upstream	-9027	8762	NearestLocation	NA
chr1	58628694	58628995	302	*	384	ENSG00000233216	58694354	58694675	-	downstream	65981	65359	NearestLocation	NA
chr1	58715976	58716348	373	*	385	ENSG00000233216	58694354	58694675	-	upstream	-21301	21301	NearestLocation	NA
chr1	58887332	58887533	202	*	386	ENSG00000173406	57460451	59012406	-	inside	125074	124873	NearestLocation	DAB1
chr1	58932603	58932986	384	*	387	ENSG00000173406	57460451	59012406	-	inside	79803	79420	NearestLocation	DAB1
chr1	58974156	58974717	562	*	388	ENSG00000173406	57460451	59012406	-	inside	38250	37689	NearestLocation	DAB1
chr1	59050334	59050701	368	*	389	ENSG00000184292	59041099	59043166	-	upstream	-7168	7168	NearestLocation	TACSTD2
chr1	59094680	59094955	276	*	390	ENSG00000185839	59096513	59097202	-	downstream	2522	1558	NearestLocation	NA
chr1	59153333	59153534	202	*	391	ENSG00000162601	59120411	59165764	-	inside	12431	12230	NearestLocation	MYSM1
chr1	59349616	59349959	344	*	392	ENSG00000232453	59348540	59362375	-	inside	12759	1076	NearestLocation	LINC02777
chr1	59364698	59365029	332	*	393	ENSG00000232453	59348540	59362375	-	upstream	-2323	2323	NearestLocation	LINC02777
chr1	59543739	59544038	300	*	394	ENSG00000235215	59521671	59543788	-	overlapStart	49	49	NearestLocation	NA
chr1	59562158	59562471	314	*	395	ENSG00000235215	59521671	59543788	-	upstream	-18370	18370	NearestLocation	NA
chr1	59616854	59617073	220	*	396	ENSG00000224609	59597608	59664293	-	inside	47439	19246	NearestLocation	HSD52
chr1	59652210	59652438	229	*	397	ENSG00000224609	59597608	59664293	-	inside	12083	11855	NearestLocation	HSD52
chr1	59859037	59859236	200	*	398	ENSG00000172456	59762310	60233347	+	inside	96727	96727	NearestLocation	FGGY
chr1	60135680	60136106	427	*	399	ENSG00000266150	60198899	60198968	-	downstream	63288	62793	NearestLocation	MIR4711
chr1	60144641	60144862	222	*	400	ENSG00000266150	60198899	60198968	-	downstream	54327	54037	NearestLocation	MIR4711
chr1	60209499	60209716	218	*	401	ENSG00000266150	60198899	60198968	-	upstream	-10531	10531	NearestLocation	MIR4711
chr1	60322440	60322741	302	*	402	ENSG00000134709	60280458	60342050	+	inside	41982	19309	NearestLocation	HOOK1
chr1	60345734	60346022	289	*	403	ENSG00000134716	60358980	60392462	-	downstream	46728	12958	NearestLocation	CYP2J2
chr1	60387072	60387362	291	*	404	ENSG00000134716	60358980	60392462	-	inside	5390	5100	NearestLocation	CYP2J2
chr1	60433084	60433304	221	*	405	ENSG00000265535	60440431	60440726	-	downstream	7642	7127	NearestLocation	RN7SL475P
chr1	60456176	60456488	313	*	406	ENSG00000265535	60440431	60440726	-	upstream	-15450	15450	NearestLocation	RN7SL475P
chr1	61352635	61352941	307	*	407	ENSG00000162599	61330931	61928465	+	inside	21704	21704	NearestLocation	NFIA
chr1	61384657	61384856	200	*	408	ENSG00000237928	61405911	61436448	-	downstream	51791	21055	NearestLocation	NFIA-AS2
chr1	61783979	61784201	223	*	409	ENSG00000237853	61714617	61719182	-	upstream	-64797	64797	NearestLocation	NFIA-AS1
chr1	61803330	61803710	381	*	410	ENSG00000237853	61714617	61719182	-	upstream	-84148	84148	NearestLocation	NFIA-AS1
chr1	62191081	62191313	233	*	411	ENSG00000162604	62146718	62191095	-	overlapStart	14	14	NearestLocation	TM2D1
chr1	62447994	62448280	287	*	412	ENSG00000236646	62504514	62504783	+	upstream	-56520	56234	NearestLocation	NA
chr1	62713605	62713955	351	*	413	ENSG00000200174	62677229	62677338	+	downstream	36376	36267	NearestLocation	NA
chr1	62744791	62745226	436	*	414	ENSG00000201153	62763821	62763928	-	downstream	19137	18595	NearestLocation	RNU6-371P
chr1	62753869	62754173	305	*	415	ENSG00000201153	62763821	62763928	-	downstream	10059	9648	NearestLocation	RNU6-371P
chr1	63154115	63154438	324	*	416	ENSG00000235545	63154153	63176365	+	overlapStart	-38	38	NearestLocation	NA
chr1	63186841	63187115	275	*	417	ENSG00000235545	63154153	63176365	+	downstream	32688	10476	NearestLocation	NA
chr1	63249493	63249896	404	*	418	ENSG00000125703	63249806	63331184	+	overlapStart	-313	90	NearestLocation	ATG4C
chr1	63288931	63289206	276	*	419	ENSG00000125703	63249806	63331184	+	inside	39125	39125	NearestLocation	ATG4C
chr1	63347981	63348181	201	*	420	ENSG00000234318	63361680	63367310	+	upstream	-13699	13499	NearestLocation	NA
chr1	63621491	63621796	306	*	421	ENSG00000271593	63624754	63628307	-	downstream	6816	2958	NearestLocation	NA
chr1	63988903	63989160	258	*	422	ENSG00000203965	63989043	64038364	+	overlapStart	-140	117	NearestLocation	EFCAB7
chr1	64109700	64110023	324	*	423	ENSG00000244256	64121414	64121716	+	upstream	-11714	11391	NearestLocation	RN7SL130P
chr1	64261225	64261591	367	*	424	ENSG00000177452	64254392	64254975	-	upstream	-6250	6250	NearestLocation	RPL19P3
chr1	64319646	64320096	451	*	425	ENSG00000228056	64308862	64309356	-	upstream	-10290	10290	NearestLocation	NA
chr1	64323185	64323506	322	*	426	ENSG00000228056	64308862	64309356	-	upstream	-13829	13829	NearestLocation	NA
chr1	64378378	64378643	266	*	427	ENSG00000228056	64308862	64309356	-	upstream	-69022	69022	NearestLocation	NA
chr1	64386056	64386609	554	*	428	ENSG00000228056	64308862	64309356	-	upstream	-76700	76700	NearestLocation	NA
chr1	64503842	64504152	311	*	429	ENSG00000207190	64494566	64494672	-	upstream	-9170	9170	NearestLocation	RNU6-809P
chr1	64558573	64558772	200	*	430	ENSG00000200508	64532312	64532413	-	upstream	-26160	26160	NearestLocation	NA
chr1	64605698	64605923	226	*	431	ENSG00000223949	64560125	64636980	-	inside	31282	31057	NearestLocation	ROR1-AS1
chr1	64985623	64985909	287	*	432	ENSG00000158966	64936428	65158741	+	inside	49195	49195	NearestLocation	CACHD1
chr1	65038290	65038804	515	*	433	ENSG00000264470	65045530	65045606	+	upstream	-7240	6726	NearestLocation	MIR4794
chr1	65063677	65064134	458	*	434	ENSG00000264470	65045530	65045606	+	downstream	18147	18071	NearestLocation	MIR4794
chr1	65081750	65082199	450	*	435	ENSG00000264470	65045530	65045606	+	downstream	36220	36144	NearestLocation	MIR4794
chr1	65191175	65191480	306	*	436	ENSG00000162437	65210778	65298915	+	upstream	-19603	19298	NearestLocation	RAVER2
chr1	65289798	65290048	251	*	437	ENSG00000162437	65210778	65298915	+	inside	79020	8867	NearestLocation	RAVER2
chr1	65722977	65723176	200	*	438	ENSG00000116675	65713902	65881552	+	inside	9075	9075	NearestLocation	DNAJC6
chr1	65733404	65733665	262	*	439	ENSG00000116675	65713902	65881552	+	inside	19502	19502	NearestLocation	DNAJC6
chr1	65744705	65745008	304	*	440	ENSG00000234144	65764438	65764663	-	downstream	19958	19430	NearestLocation	COX6CP13
chr1	65758675	65758945	271	*	441	ENSG00000234144	65764438	65764663	-	downstream	5988	5493	NearestLocation	COX6CP13
chr1	65901689	65901888	200	*	442	LRG_283	65886335	66103176	+	inside	15354	15354	NearestLocation	NA
chr1	66019935	66020134	200	*	443	ENSG00000238931	66037232	66037335	+	upstream	-17297	17098	NearestLocation	NA
chr1	66087313	66087784	472	*	444	ENSG00000224570	66041812	66044063	-	upstream	-43250	43250	NearestLocation	NA
chr1	66153547	66153945	399	*	445	ENSG00000239319	66226743	66227035	-	downstream	73488	72798	NearestLocation	RN7SL854P
chr1	66548841	66549044	204	*	446	ENSG00000223152	66560144	66560229	-	downstream	11388	11100	NearestLocation	RNU4-88P
chr1	66739292	66739721	430	*	447	ENSG00000223152	66560144	66560229	-	upstream	-179063	179063	NearestLocation	RNU4-88P
chr1	66822354	66822601	248	*	448	ENSG00000118473	66999066	67213982	+	upstream	-176712	176465	NearestLocation	SGIP1
chr1	66915876	66916365	490	*	449	ENSG00000118473	66999066	67213982	+	upstream	-83190	82701	NearestLocation	SGIP1
chr1	67057641	67057980	340	*	450	ENSG00000264720	67094123	67094200	+	upstream	-36482	36143	NearestLocation	MIR3117
chr1	67230746	67230945	200	*	451	ENSG00000152760	67218142	67244470	+	inside	12604	12604	NearestLocation	TCTEX1D1
chr1	67624536	67624999	464	*	452	ENSG00000162594	67632083	67725662	+	upstream	-7547	7084	NearestLocation	IL23R
chr1	67631959	67632253	295	*	453	ENSG00000162594	67632083	67725662	+	overlapStart	-124	124	NearestLocation	IL23R
chr1	67858820	67859126	307	*	454	ENSG00000223263	67882897	67883001	+	upstream	-24077	23771	NearestLocation	RNU6-387P
chr1	67904892	67905328	437	*	455	ENSG00000142864	67873493	67896098	-	upstream	-8794	8794	NearestLocation	SERBP1
chr1	67979486	67979691	206	*	456	ENSG00000235200	67995313	67998012	+	upstream	-15827	15622	NearestLocation	NA
chr1	68036250	68036462	213	*	457	ENSG00000238139	68026756	68027129	+	downstream	9494	9121	NearestLocation	NA
chr1	68074479	68074830	352	*	458	ENSG00000238139	68026756	68027129	+	downstream	47723	47350	NearestLocation	NA
chr1	68152316	68152725	410	*	459	ENSG00000116717	68150744	68154021	+	inside	1572	1296	NearestLocation	GADD45A
chr1	68166447	68166777	331	*	460	ENSG00000116717	68150744	68154021	+	downstream	15703	12426	NearestLocation	GADD45A
chr1	68204134	68204413	280	*	461	ENSG00000238778	68238276	68238336	-	downstream	34202	33863	NearestLocation	RNU7-80P
chr1	68237578	68237808	231	*	462	ENSG00000238778	68238276	68238336	-	downstream	758	468	NearestLocation	RNU7-80P
chr1	68364053	68364395	343	*	463	ENSG00000172380	68167149	68299150	-	upstream	-64903	64903	NearestLocation	GNG12
chr1	68417748	68417980	233	*	464	ENSG00000235055	68509013	68509916	+	upstream	-91265	91033	NearestLocation	LOC100133029
chr1	68422704	68423010	307	*	465	ENSG00000235055	68509013	68509916	+	upstream	-86309	86003	NearestLocation	LOC100133029
chr1	68757650	68757898	249	*	466	ENSG00000225242	68748071	68748305	+	downstream	9579	9345	NearestLocation	COX6B1P7
chr1	69242950	69243251	302	*	467	ENSG00000225167	68980058	68980352	-	upstream	-262598	262598	NearestLocation	NA
chr1	69441274	69441473	200	*	468	ENSG00000223883	69521581	69650686	+	upstream	-80307	80108	NearestLocation	LINC01707
chr1	70150242	70150472	231	*	469	ENSG00000270615	70072538	70073984	-	upstream	-76258	76258	NearestLocation	SGO1P1
chr1	70606548	70606861	314	*	470	ENSG00000244389	70645829	70646123	-	downstream	39575	38968	NearestLocation	RN7SL242P
chr1	70671221	70671567	347	*	471	ENSG00000066557	70610488	70671303	-	overlapStart	82	82	NearestLocation	LRRC40
chr1	70926524	70926963	440	*	472	ENSG00000271992	70910754	70911219	+	downstream	15770	15305	NearestLocation	NA
chr1	71473011	71473301	291	*	473	ENSG00000269933	71471537	71472185	-	upstream	-826	826	NearestLocation	NA
chr1	71484966	71485350	385	*	474	ENSG00000269933	71471537	71472185	-	upstream	-12781	12781	NearestLocation	NA
chr1	71694392	71694699	308	*	475	ENSG00000237726	71716682	71717802	+	upstream	-22290	21983	NearestLocation	NA
chr1	72054797	72055015	219	*	476	ENSG00000231985	72036639	72039241	+	downstream	18158	15556	NearestLocation	NA
chr1	73766190	73766805	616	*	477	ENSG00000233973	73771853	73820934	+	upstream	-5663	5048	NearestLocation	LINC01360
chr1	74470207	74470535	329	*	478	ENSG00000252005	74349396	74349505	+	downstream	120811	120702	NearestLocation	RNU4ATAC8P
chr1	74541301	74541594	294	*	479	ENSG00000162620	74491699	74663871	-	inside	122570	49602	NearestLocation	LRRIQ3
chr1	74789820	74790019	200	*	480	ENSG00000237324	74807263	74844486	-	downstream	54666	17244	NearestLocation	NA
chr1	74828774	74829198	425	*	481	ENSG00000237324	74807263	74844486	-	inside	15712	15288	NearestLocation	NA
chr1	74858594	74858878	285	*	482	ENSG00000237324	74807263	74844486	-	upstream	-14108	14108	NearestLocation	NA
chr1	74886251	74886518	268	*	483	ENSG00000237324	74807263	74844486	-	upstream	-41765	41765	NearestLocation	NA
chr1	74968200	74968399	200	*	484	ENSG00000162621	74935562	74978298	-	inside	10098	9899	NearestLocation	LRRC53
chr1	75430374	75430645	272	*	485	ENSG00000229943	75428998	75430802	+	inside	1376	157	NearestLocation	NA
chr1	76489651	76490004	354	*	486	ENSG00000225605	76477009	76485041	+	downstream	12642	4610	NearestLocation	NA
chr1	76780501	76780710	210	*	487	ENSG00000223905	76819268	76819931	-	downstream	39430	38558	NearestLocation	LOC100418965
chr1	78353916	78354308	393	*	488	LRG_442	78354200	78409580	+	overlapStart	-284	108	NearestLocation	NA
chr1	78444190	78444400	211	*	489	ENSG00000162613	78409740	78444794	-	inside	604	394	NearestLocation	FUBP1
chr1	78547903	78548328	426	*	490	ENSG00000251958	78554672	78554767	-	downstream	6864	6344	NearestLocation	RNU6-1102P
chr1	79028636	79028885	250	*	491	ENSG00000137959	79085607	79111830	+	upstream	-56971	56722	NearestLocation	IFI44L
chr1	79071970	79072344	375	*	492	ENSG00000137959	79085607	79111830	+	upstream	-13637	13263	NearestLocation	IFI44L
chr1	79124541	79124773	233	*	493	ENSG00000238015	79131957	79132380	+	upstream	-7416	7184	NearestLocation	RPL23P3
chr1	79963029	79963239	211	*	494	ENSG00000232676	79986765	79987888	+	upstream	-23736	23526	NearestLocation	ADH5P2
chr1	80112690	80113077	388	*	495	ENSG00000232676	79986765	79987888	+	downstream	125925	124802	NearestLocation	ADH5P2
chr1	80118178	80118521	344	*	496	ENSG00000232676	79986765	79987888	+	downstream	131413	130290	NearestLocation	ADH5P2
chr1	80168158	80168678	521	*	497	ENSG00000232676	79986765	79987888	+	downstream	181393	180270	NearestLocation	ADH5P2
chr1	80243112	80243524	413	*	498	ENSG00000232676	79986765	79987888	+	downstream	256347	255224	NearestLocation	ADH5P2
chr1	80724217	80724604	388	*	499	ENSG00000236407	80749037	80749655	+	upstream	-24820	24433	NearestLocation	NA
chr1	81689975	81690309	335	*	500	ENSG00000235089	81674253	81674895	+	downstream	15722	15080	NearestLocation	RPL10AP4
chr1	81771789	81771998	210	*	501	ENSG00000117114	81771845	82458120	+	overlapStart	-56	56	NearestLocation	ADGRL2
chr1	81782887	81783214	328	*	502	ENSG00000117114	81771845	82458120	+	inside	11042	11042	NearestLocation	ADGRL2
chr1	81796222	81796568	347	*	503	ENSG00000117114	81771845	82458120	+	inside	24377	24377	NearestLocation	ADGRL2
chr1	81854156	81854431	276	*	504	ENSG00000224494	81892141	81893290	+	upstream	-37985	37710	NearestLocation	HNRNPA3P14
chr1	81889794	81890148	355	*	505	ENSG00000224494	81892141	81893290	+	upstream	-2347	1993	NearestLocation	HNRNPA3P14
chr1	81983806	81984047	242	*	506	ENSG00000227960	81970784	81971981	+	downstream	13022	11825	NearestLocation	NA
chr1	82001023	82001241	219	*	507	ENSG00000234953	81979565	82023387	-	inside	22364	21458	NearestLocation	LOC101927434
chr1	82101426	82101748	323	*	508	ENSG00000236676	82051626	82091398	-	upstream	-10028	10028	NearestLocation	NA
chr1	82133117	82133419	303	*	509	ENSG00000236676	82051626	82091398	-	upstream	-41719	41719	NearestLocation	NA
chr1	82148223	82148528	306	*	510	ENSG00000215875	82187378	82188753	+	upstream	-39155	38850	NearestLocation	NA
chr1	82205329	82205629	301	*	511	ENSG00000215875	82187378	82188753	+	downstream	17951	16576	NearestLocation	NA
chr1	82266751	82267108	358	*	512	ENSG00000215875	82187378	82188753	+	downstream	79373	77998	NearestLocation	NA
chr1	82314558	82314966	409	*	513	ENSG00000215875	82187378	82188753	+	downstream	127180	125805	NearestLocation	NA
chr1	82439987	82440474	488	*	514	ENSG00000215875	82187378	82188753	+	downstream	252609	251234	NearestLocation	NA
chr1	83079917	83080193	277	*	515	ENSG00000230817	83368866	83632498	+	upstream	-288949	288673	NearestLocation	LINC01362
chr1	83507307	83507556	250	*	516	ENSG00000236268	83439565	83451891	-	upstream	-55416	55416	NearestLocation	LINC01361
chr1	83568345	83568686	342	*	517	ENSG00000236268	83439565	83451891	-	upstream	-116454	116454	NearestLocation	LINC01361
chr1	83585523	83586043	521	*	518	ENSG00000236268	83439565	83451891	-	upstream	-133632	133632	NearestLocation	LINC01361
chr1	83717452	83717719	268	*	519	ENSG00000231364	83911736	83920454	+	upstream	-194284	194017	NearestLocation	NA
chr1	83738187	83738528	342	*	520	ENSG00000231364	83911736	83920454	+	upstream	-173549	173208	NearestLocation	NA
chr1	84569109	84569308	200	*	521	ENSG00000213540	84551424	84551916	+	downstream	17685	17193	NearestLocation	NA
chr1	84972080	84972279	200	*	522	ENSG00000174021	84964008	84972248	-	overlapStart	168	31	NearestLocation	GNG5
chr1	85069026	85069272	247	*	523	ENSG00000117151	85015289	85040163	-	upstream	-28863	28863	NearestLocation	CTBS
chr1	85083171	85083405	235	*	524	ENSG00000180869	85093913	85100703	-	downstream	17532	10508	NearestLocation	LINC01555
chr1	85336340	85336643	304	*	525	ENSG00000171517	85277285	85358896	-	inside	22556	22253	NearestLocation	LPAR3
chr1	85426135	85426446	312	*	526	ENSG00000153898	85391268	85462796	-	inside	36661	34867	NearestLocation	MCOLN2
chr1	85690718	85691165	448	*	527	ENSG00000097096	85622556	85666729	-	upstream	-23989	23989	NearestLocation	SYDE2
chr1	85691826	85692043	218	*	528	ENSG00000097096	85622556	85666729	-	upstream	-25097	25097	NearestLocation	SYDE2
chr1	85794743	85795043	301	*	529	ENSG00000264380	85750293	85750356	+	downstream	44450	44387	NearestLocation	NA
chr1	85937268	85937570	303	*	530	ENSG00000273264	85932978	85933343	+	downstream	4290	3925	NearestLocation	NA
chr1	86010518	86010728	211	*	531	ENSG00000153904	85784164	86043933	-	inside	33415	33205	NearestLocation	DDAH1
chr1	86078382	86078883	502	*	532	ENSG00000230285	86064814	86066417	+	downstream	13568	11965	NearestLocation	NA
chr1	86200496	86200749	254	*	533	ENSG00000117174	86115106	86174116	-	upstream	-26380	26380	NearestLocation	ZNHIT6
chr1	86968408	86968677	270	*	534	ENSG00000016490	86934051	86965972	+	downstream	34357	2436	NearestLocation	CLCA1
chr1	86969556	86970051	496	*	535	ENSG00000016490	86934051	86965972	+	downstream	35505	3584	NearestLocation	CLCA1
chr1	87170135	87170441	307	*	536	ENSG00000261737	87169185	87170145	-	overlapStart	10	10	NearestLocation	CLCA4-AS1
chr1	87240734	87241406	673	*	537	ENSG00000230721	87250596	87251150	+	upstream	-9862	9190	NearestLocation	RPL17P5
chr1	87258878	87259256	379	*	538	ENSG00000230721	87250596	87251150	+	downstream	8282	7728	NearestLocation	RPL17P5
chr1	87282127	87282363	237	*	539	ENSG00000230721	87250596	87251150	+	downstream	31531	30977	NearestLocation	RPL17P5
chr1	87412716	87412952	237	*	540	ENSG00000224198	87409368	87410425	-	upstream	-2291	2291	NearestLocation	NA
chr1	87418939	87419256	318	*	541	ENSG00000224198	87409368	87410425	-	upstream	-8514	8514	NearestLocation	NA
chr1	87821411	87821656	246	*	542	ENSG00000227290	87819207	87837338	-	inside	15927	2204	NearestLocation	LINC01364
chr1	87835416	87835748	333	*	543	ENSG00000227290	87819207	87837338	-	inside	1922	1590	NearestLocation	LINC01364
chr1	88069365	88069564	200	*	544	ENSG00000199318	87918923	87919056	-	upstream	-150309	150309	NearestLocation	RNA5SP52
chr1	88178012	88178233	222	*	545	ENSG00000224235	88365592	88371397	-	downstream	193385	187359	NearestLocation	NA
chr1	88937967	88938386	420	*	546	ENSG00000239504	88943514	88943797	-	downstream	5830	5128	NearestLocation	RN7SL583P
chr1	89439342	89439541	200	*	547	ENSG00000137944	89401456	89458636	-	inside	19294	19095	NearestLocation	KYAT3
chr1	89514904	89515296	393	*	548	ENSG00000117228	89518002	89531043	-	downstream	16139	2706	NearestLocation	GBP1
chr1	89530442	89530830	389	*	549	ENSG00000117228	89518002	89531043	-	inside	601	213	NearestLocation	GBP1
chr1	89663759	89664113	355	*	550	ENSG00000162654	89646831	89664615	-	inside	856	502	NearestLocation	GBP4
chr1	89685607	89685820	214	*	551	ENSG00000162654	89646831	89664615	-	upstream	-20992	20992	NearestLocation	GBP4
chr1	89760927	89761170	244	*	552	ENSG00000238081	89755359	89756020	-	upstream	-4907	4907	NearestLocation	NA
chr1	89829814	89830033	220	*	553	ENSG00000183347	89829617	89852020	+	inside	197	197	NearestLocation	GBP6
chr1	89920660	89920958	299	*	554	ENSG00000225492	89873238	89891802	+	downstream	47422	28858	NearestLocation	GBP1P1
chr1	89969329	89969579	251	*	555	ENSG00000197147	89990395	90063423	+	upstream	-21066	20816	NearestLocation	LRRC8B
chr1	90097584	90097835	252	*	556	ENSG00000231999	90048800	90098453	-	inside	869	618	NearestLocation	LRRC8C-DT
chr1	90228539	90228900	362	*	557	ENSG00000239176	90233771	90233877	-	downstream	5338	4871	NearestLocation	NA
chr1	90289171	90289573	403	*	558	ENSG00000171492	90286573	90402170	+	inside	2598	2598	NearestLocation	LRRC8D
chr1	90366396	90366731	336	*	559	ENSG00000272672	90405160	90405706	+	upstream	-38764	38429	NearestLocation	NA
chr1	90372189	90372435	247	*	560	ENSG00000272672	90405160	90405706	+	upstream	-32971	32725	NearestLocation	NA
chr1	91414017	91414216	200	*	561	ENSG00000232882	91358549	91359169	-	upstream	-54848	54848	NearestLocation	NA
chr1	91563968	91564335	368	*	562	ENSG00000232393	91489476	91490361	+	downstream	74492	73607	NearestLocation	RPL5P6
chr1	91630852	91631130	279	*	563	ENSG00000206817	91727182	91727281	+	upstream	-96330	96052	NearestLocation	NA
chr1	92060069	92060559	491	*	564	ENSG00000229067	92065728	92065878	+	upstream	-5659	5169	NearestLocation	NA
chr1	92067198	92067784	587	*	565	ENSG00000229067	92065728	92065878	+	downstream	1470	1320	NearestLocation	NA
chr1	92173088	92173454	367	*	566	ENSG00000203914	92100568	92109639	+	downstream	72520	63449	NearestLocation	HSP90B3P
chr1	93270363	93270704	342	*	567	ENSG00000067208	92974253	93257961	-	upstream	-12402	12402	NearestLocation	EVI5
chr1	93297666	93297883	218	*	568	ENSG00000122406	93297582	93307481	+	inside	84	84	NearestLocation	RPL5
chr1	93434012	93434255	244	*	569	ENSG00000252121	93435161	93435267	-	downstream	1255	906	NearestLocation	RNU6-970P
chr1	93544509	93544801	293	*	570	ENSG00000143033	93544792	93604638	+	overlapStart	-283	9	NearestLocation	MTF2
chr1	93638329	93638669	341	*	571	ENSG00000122483	93645476	93744287	+	upstream	-7147	6807	NearestLocation	CCDC18
chr1	93907931	93908187	257	*	572	ENSG00000137942	93913688	94020218	+	upstream	-5757	5501	NearestLocation	FNBP1L
chr1	93939813	93940217	405	*	573	ENSG00000212601	93953890	93954009	-	downstream	14196	13673	NearestLocation	RNA5SP53
chr1	94018375	94018611	237	*	574	ENSG00000224093	94057756	94071130	+	upstream	-39381	39145	NearestLocation	NA
chr1	94032983	94033297	315	*	575	ENSG00000224093	94057756	94071130	+	upstream	-24773	24459	NearestLocation	NA
chr1	94050769	94051204	436	*	576	ENSG00000224093	94057756	94071130	+	upstream	-6987	6552	NearestLocation	NA
chr1	94097290	94097588	299	*	577	ENSG00000224093	94057756	94071130	+	downstream	39534	26160	NearestLocation	NA
chr1	94181114	94181553	440	*	578	ENSG00000230439	94218480	94241000	-	downstream	59886	36927	NearestLocation	NA
chr1	94217556	94217838	283	*	579	ENSG00000230439	94218480	94241000	-	downstream	23444	642	NearestLocation	NA
chr1	94313560	94313908	349	*	580	ENSG00000260464	94312730	94314495	+	inside	830	587	NearestLocation	NA
chr1	94486630	94486868	239	*	581	ENSG00000233129	94400035	94400800	-	upstream	-85830	85830	NearestLocation	NA
chr1	94511122	94511426	305	*	582	ENSG00000198691	94458393	94586688	-	inside	75566	52729	NearestLocation	ABCA4
chr1	94746993	94747256	264	*	583	ENSG00000137962	94614544	94740624	-	upstream	-6369	6369	NearestLocation	ARHGAP29
chr1	94993208	94993433	226	*	584	ENSG00000117525	94994781	95007356	-	downstream	14148	1348	NearestLocation	F3
chr1	95095488	95095734	247	*	585	ENSG00000235565	95086707	95089740	-	upstream	-5748	5748	NearestLocation	NA
chr1	95119534	95119778	245	*	586	ENSG00000232857	95116100	95116934	-	upstream	-2600	2600	NearestLocation	NA
chr1	95123503	95124183	681	*	587	ENSG00000232857	95116100	95116934	-	upstream	-6569	6569	NearestLocation	NA
chr1	95391443	95391709	267	*	588	ENSG00000117519	95362507	95392834	-	inside	1391	1125	NearestLocation	CNN3
chr1	95402482	95402692	211	*	589	ENSG00000235501	95393122	95428826	+	inside	9360	9360	NearestLocation	NA
chr1	95419722	95420201	480	*	590	ENSG00000235501	95393122	95428826	+	inside	26600	8625	NearestLocation	NA
chr1	95527049	95527486	438	*	591	ENSG00000230427	95527152	95533101	+	overlapStart	-103	103	NearestLocation	ALG14-AS1
chr1	95534551	95534828	278	*	592	ENSG00000172339	95439963	95538501	-	inside	3950	3673	NearestLocation	ALG14
chr1	95622326	95622525	200	*	593	ENSG00000206679	95591067	95591165	-	upstream	-31161	31161	NearestLocation	NA
chr1	95645179	95645484	306	*	594	ENSG00000206679	95591067	95591165	-	upstream	-54014	54014	NearestLocation	NA
chr1	95702762	95703129	368	*	595	ENSG00000122481	95699711	95712781	+	inside	3051	3051	NearestLocation	RWDD3
chr1	95805695	95805981	287	*	596	ENSG00000230434	95816807	95817810	-	downstream	12115	10826	NearestLocation	NA
chr1	95850190	95850549	360	*	597	ENSG00000237954	95821785	95846556	-	upstream	-3634	3634	NearestLocation	NA
chr1	96014651	96014905	255	*	598	ENSG00000228971	95975672	96247898	+	inside	38979	38979	NearestLocation	LINC02607
chr1	96455625	96455925	301	*	599	ENSG00000237435	96403457	96488436	+	inside	52168	32511	NearestLocation	LINC02790
chr1	96880144	96880396	253	*	600	ENSG00000234422	96884150	96884489	+	upstream	-4006	3754	NearestLocation	UBE2WP1
chr1	96989775	96990009	235	*	601	ENSG00000241992	97048765	97049081	+	upstream	-58990	58756	NearestLocation	RN7SL831P
chr1	97303357	97303626	270	*	602	ENSG00000212039	97368255	97368348	+	upstream	-64898	64629	NearestLocation	NA
chr1	97463388	97463631	244	*	603	ENSG00000265771	97401101	97401219	+	downstream	62287	62169	NearestLocation	NA
chr1	97762828	97763058	231	*	604	ENSG00000232542	97859710	97885697	-	downstream	122869	96652	NearestLocation	NA
chr1	97814165	97814507	343	*	605	ENSG00000232542	97859710	97885697	-	downstream	71532	45203	NearestLocation	NA
chr1	99023413	99023739	327	*	606	ENSG00000162627	99127236	99226056	+	upstream	-103823	103497	NearestLocation	SNX7
chr1	99645944	99646325	382	*	607	ENSG00000117600	99729509	99775146	+	upstream	-83565	83184	NearestLocation	PLPPR4
chr1	99745149	99745414	266	*	608	ENSG00000117600	99729509	99775146	+	inside	15640	15640	NearestLocation	PLPPR4
chr1	99862705	99863005	301	*	609	ENSG00000233983	99929934	99930332	+	upstream	-67229	66929	NearestLocation	NA
chr1	99905190	99905681	492	*	610	ENSG00000233983	99929934	99930332	+	upstream	-24744	24253	NearestLocation	NA
chr1	99946998	99947289	292	*	611	ENSG00000233983	99929934	99930332	+	downstream	17064	16666	NearestLocation	NA
chr1	99994800	99995006	207	*	612	ENSG00000224445	99937971	99999571	-	inside	4771	4565	NearestLocation	LINC01708
chr1	100111782	100112046	265	*	613	ENSG00000099260	100111499	100160097	+	inside	283	283	NearestLocation	PALMD
chr1	100247453	100247743	291	*	614	ENSG00000201491	100250296	100250441	-	downstream	2988	2553	NearestLocation	RNU4-75P
chr1	100249772	100250053	282	*	615	ENSG00000201491	100250296	100250441	-	downstream	669	243	NearestLocation	RNU4-75P
chr1	100274339	100274718	380	*	616	ENSG00000202254	100257218	100257309	+	downstream	17121	17030	NearestLocation	NA
chr1	100301857	100302077	221	*	617	ENSG00000231996	100308166	100308317	+	upstream	-6309	6089	NearestLocation	NA
chr1	100315933	100316322	390	*	618	ENSG00000162688	100315640	100389579	+	inside	293	293	NearestLocation	AGL
chr1	100424872	100425162	291	*	619	ENSG00000117620	100435345	100492535	+	upstream	-10473	10183	NearestLocation	SLC35A3
chr1	100435331	100435571	241	*	620	ENSG00000117620	100435345	100492535	+	overlapStart	-14	14	NearestLocation	SLC35A3
chr1	100598267	100598750	484	*	621	ENSG00000122435	100598706	100616053	+	overlapStart	-439	44	NearestLocation	TRMT13
chr1	100816953	100817347	395	*	622	ENSG00000079335	100810584	100985833	+	inside	6369	6369	NearestLocation	CDC14A
chr1	100818391	100818662	272	*	623	ENSG00000079335	100810584	100985833	+	inside	7807	7807	NearestLocation	CDC14A
chr1	101172398	101172884	487	*	624	ENSG00000162692	101185298	101204601	+	upstream	-12900	12414	NearestLocation	VCAM1
chr1	101223527	101223883	357	*	625	ENSG00000162692	101185298	101204601	+	downstream	38229	18926	NearestLocation	VCAM1
chr1	101226085	101226325	241	*	626	ENSG00000162692	101185298	101204601	+	downstream	40787	21484	NearestLocation	VCAM1
chr1	101261309	101261557	249	*	627	ENSG00000162692	101185298	101204601	+	downstream	76011	56708	NearestLocation	VCAM1
chr1	101448540	101448744	205	*	628	ENSG00000269175	101455761	101457653	+	upstream	-7221	7017	NearestLocation	NA
chr1	101552395	101552641	247	*	629	ENSG00000252765	101598709	101598895	+	upstream	-46314	46068	NearestLocation	NA
chr1	101596197	101596539	343	*	630	ENSG00000252765	101598709	101598895	+	upstream	-2512	2170	NearestLocation	NA
chr1	101631483	101631789	307	*	631	ENSG00000271578	101656076	101656550	+	upstream	-24593	24287	NearestLocation	NA
chr1	101649031	101649269	239	*	632	ENSG00000271578	101656076	101656550	+	upstream	-7045	6807	NearestLocation	NA
chr1	101669693	101669987	295	*	633	ENSG00000271578	101656076	101656550	+	downstream	13617	13143	NearestLocation	NA
chr1	101682914	101683352	439	*	634	ENSG00000238296	101694220	101694321	-	downstream	11407	10868	NearestLocation	NA
chr1	101730303	101730693	391	*	635	ENSG00000173810	101736431	101736919	-	downstream	6616	5738	NearestLocation	NA
chr1	101757217	101757455	239	*	636	ENSG00000173810	101736431	101736919	-	upstream	-20298	20298	NearestLocation	NA
chr1	101772968	101773449	482	*	637	ENSG00000231671	101788893	101855859	+	upstream	-15925	15444	NearestLocation	LINC01307
chr1	101910340	101910923	584	*	638	ENSG00000231671	101788893	101855859	+	downstream	121447	54481	NearestLocation	LINC01307
chr1	101939690	101939938	249	*	639	ENSG00000231671	101788893	101855859	+	downstream	150797	83831	NearestLocation	LINC01307
chr1	101947898	101948272	375	*	640	ENSG00000231671	101788893	101855859	+	downstream	159005	92039	NearestLocation	LINC01307
chr1	102718374	102718656	283	*	641	ENSG00000233359	102665295	102855186	-	inside	136812	53079	NearestLocation	NA
chr1	103523955	103524244	290	*	642	ENSG00000234257	103565699	103566260	-	downstream	42305	41455	NearestLocation	SOD2P1
chr1	103731225	103731455	231	*	643	ENSG00000232753	103817769	103828355	+	upstream	-86544	86314	NearestLocation	NA
chr1	104068670	104069000	331	*	644	ENSG00000185946	104068313	104097861	+	inside	357	357	NearestLocation	RNPC3
chr1	104677576	104678072	497	*	645	ENSG00000228347	104695928	104696452	-	downstream	18876	17856	NearestLocation	NA
chr1	105976965	105977253	289	*	646	ENSG00000225036	105976616	105977443	+	inside	349	190	NearestLocation	CDK4P1
chr1	106175458	106175826	369	*	647	ENSG00000230768	106130197	106161580	-	upstream	-13878	13878	NearestLocation	LINC01676
chr1	106384742	106385084	343	*	648	ENSG00000237897	106433315	106434052	-	downstream	49310	48231	NearestLocation	NA
chr1	106810724	106810941	218	*	649	ENSG00000230932	106623423	106624001	-	upstream	-186723	186723	NearestLocation	NA
chr1	107431812	107432011	200	*	650	ENSG00000237460	107360861	107380789	+	downstream	70951	51023	NearestLocation	NA
chr1	107492796	107493139	344	*	651	ENSG00000198890	107599267	107601916	+	upstream	-106471	106128	NearestLocation	PRMT6
chr1	107525137	107525393	257	*	652	ENSG00000198890	107599267	107601916	+	upstream	-74130	73874	NearestLocation	PRMT6
chr1	108009946	108010250	305	*	653	ENSG00000238883	107991091	107991177	-	upstream	-18769	18769	NearestLocation	NA
chr1	108405907	108406309	403	*	654	ENSG00000265536	108318796	108318878	-	upstream	-87029	87029	NearestLocation	NA
chr1	108559100	108559461	362	*	655	ENSG00000264753	108561275	108561393	-	downstream	2293	1814	NearestLocation	NA
chr1	108588009	108588378	370	*	656	ENSG00000226822	108614104	108617141	+	upstream	-26095	25726	NearestLocation	NA
chr1	109224380	109224653	274	*	657	ENSG00000134186	109234945	109244425	+	upstream	-10565	10292	NearestLocation	PRPF38B
chr1	109633187	109633503	317	*	658	ENSG00000273382	109630593	109633480	-	overlapStart	293	23	NearestLocation	NA
chr1	109642797	109643186	390	*	659	ENSG00000270066	109642815	109643241	+	overlapStart	-18	18	NearestLocation	NA
chr1	109740129	109740449	321	*	660	ENSG00000238310	109750416	109750470	-	downstream	10341	9967	NearestLocation	NA
chr1	109849704	109850486	783	*	661	ENSG00000221986	109834987	109849663	-	upstream	-41	41	NearestLocation	MYBPHL
chr1	109925831	109926308	478	*	662	ENSG00000134243	109852192	109940573	-	inside	14742	14265	NearestLocation	SORT1
chr1	110227287	110227492	206	*	663	ENSG00000134184	110230436	110251661	+	upstream	-3149	2944	NearestLocation	GSTM1
chr1	110348135	110348398	264	*	664	ENSG00000224927	110353264	110353620	-	downstream	5485	4866	NearestLocation	NA
chr1	110473777	110474037	261	*	665	ENSG00000184371	110452864	110473614	+	downstream	20913	163	NearestLocation	CSF1
chr1	110496899	110497204	306	*	666	ENSG00000168710	110527308	110566357	+	upstream	-30409	30104	NearestLocation	AHCYL1
chr1	110546587	110546786	200	*	667	ENSG00000168710	110527308	110566357	+	inside	19279	19279	NearestLocation	AHCYL1
chr1	110882079	110882341	263	*	668	ENSG00000227963	110828997	110881793	-	upstream	-286	286	NearestLocation	RBM15-AS1
chr1	111019758	111019992	235	*	669	ENSG00000240194	111023374	111033899	+	upstream	-3616	3382	NearestLocation	CYMP
chr1	111162095	111162332	238	*	670	ENSG00000177301	111136202	111174096	-	inside	12001	11764	NearestLocation	KCNA2
chr1	111506675	111506910	236	*	671	ENSG00000121931	111489807	111506701	-	overlapStart	26	26	NearestLocation	LRIF1
chr1	111511669	111511883	215	*	672	ENSG00000121931	111489807	111506701	-	upstream	-4968	4968	NearestLocation	LRIF1
chr1	111762113	111762427	315	*	673	ENSG00000162777	111729796	111747157	-	upstream	-14956	14956	NearestLocation	DENND2D
chr1	111902740	111902985	246	*	674	ENSG00000234020	111895897	111910031	-	inside	7291	6843	NearestLocation	NA
chr1	111907272	111907732	461	*	675	ENSG00000234020	111895897	111910031	-	inside	2759	2299	NearestLocation	NA
chr1	111992120	111992324	205	*	676	ENSG00000116455	111982512	111991998	-	upstream	-122	122	NearestLocation	WDR77
chr1	112102442	112102834	393	*	677	ENSG00000121933	112025970	112106584	-	inside	4142	3750	NearestLocation	TMIGD3
chr1	112247543	112247807	265	*	678	ENSG00000227811	112282463	112290420	+	upstream	-34920	34656	NearestLocation	INKA2-AS1
chr1	112286357	112286668	312	*	679	ENSG00000227811	112282463	112290420	+	inside	3894	3752	NearestLocation	INKA2-AS1
chr1	112291441	112291941	501	*	680	ENSG00000064703	112297867	112310638	+	upstream	-6426	5926	NearestLocation	DDX20
chr1	112297894	112298093	200	*	681	ENSG00000064703	112297867	112310638	+	inside	27	27	NearestLocation	DDX20
chr1	112319028	112319263	236	*	682	ENSG00000197852	112223252	112298446	-	upstream	-20582	20582	NearestLocation	INKA2
chr1	112320991	112321272	282	*	683	ENSG00000197852	112223252	112298446	-	upstream	-22545	22545	NearestLocation	INKA2
chr1	112476327	112476688	362	*	684	ENSG00000237556	112451958	112453553	+	downstream	24369	22774	NearestLocation	KCND3-AS1
chr1	112519468	112519681	214	*	685	ENSG00000171385	112313284	112531777	-	inside	12309	12096	NearestLocation	KCND3
chr1	112519468	112519681	214	*	685	LRG_445	112318454	112531777	-	inside	12309	12096	NearestLocation	NA
chr1	112850405	112850685	281	*	686	ENSG00000231246	112719856	112903150	-	inside	52745	52465	NearestLocation	LINC02884
chr1	112926434	112926763	330	*	687	ENSG00000143079	112938803	113006078	+	upstream	-12369	12040	NearestLocation	CTTNBP2NL
chr1	112933572	112933803	232	*	688	ENSG00000143079	112938803	113006078	+	upstream	-5231	5000	NearestLocation	CTTNBP2NL
chr1	113162031	113162261	231	*	689	ENSG00000116489	113161795	113214241	+	inside	236	236	NearestLocation	CAPZA1
chr1	113346602	113346968	367	*	690	ENSG00000224167	113392650	113420493	+	upstream	-46048	45682	NearestLocation	NA
chr1	113368900	113369139	240	*	691	ENSG00000224167	113392650	113420493	+	upstream	-23750	23511	NearestLocation	NA
chr1	113540508	113540746	239	*	692	ENSG00000236066	113550876	113589677	+	upstream	-10368	10130	NearestLocation	NA
chr1	113582791	113583174	384	*	693	ENSG00000236066	113550876	113589677	+	inside	31915	6503	NearestLocation	NA
chr1	113585264	113585482	219	*	694	ENSG00000238198	113554309	113615727	-	inside	30463	30245	NearestLocation	LRIG2-DT
chr1	113614851	113615616	766	*	695	ENSG00000238198	113554309	113615727	-	inside	876	111	NearestLocation	LRIG2-DT
chr1	113760501	113760816	316	*	696	ENSG00000236887	113741447	113741880	+	downstream	19054	18621	NearestLocation	RPS15P1
chr1	114489341	114489747	407	*	697	ENSG00000235527	114466622	114472114	-	upstream	-17227	17227	NearestLocation	HIPK1-AS1
chr1	114564553	114564831	279	*	698	ENSG00000270780	114544055	114544857	-	upstream	-19696	19696	NearestLocation	NA
chr1	114652752	114652951	200	*	699	ENSG00000134207	114631913	114696541	-	inside	43789	20839	NearestLocation	SYT6
chr1	115052809	115053218	410	*	700	ENSG00000197323	114935399	115053781	-	inside	972	563	NearestLocation	TRIM33
chr1	115124120	115124534	415	*	701	ENSG00000116752	115110178	115124260	-	overlapStart	140	140	NearestLocation	BCAS2
chr1	115212883	115213186	304	*	702	ENSG00000175984	115125469	115213043	-	overlapStart	160	143	NearestLocation	DENND2C
chr1	115299702	115300049	348	*	703	ENSG00000009307	115259534	115301297	-	inside	1595	1248	NearestLocation	CSDE1
chr1	115579762	115580249	488	*	704	ENSG00000134200	115572415	115576941	+	downstream	7347	2821	NearestLocation	TSHB
chr1	115599231	115599457	227	*	705	ENSG00000134200	115572415	115576941	+	downstream	26816	22290	NearestLocation	TSHB
chr1	115843161	115843494	334	*	706	ENSG00000228035	115825655	115910693	+	inside	17506	17506	NearestLocation	NGF-AS1
chr1	116018254	116018638	385	*	707	ENSG00000226973	116014562	116018648	+	inside	3692	10	NearestLocation	NA
chr1	116088462	116088693	232	*	708	ENSG00000229101	116099447	116100096	+	upstream	-10985	10754	NearestLocation	NA
chr1	116249385	116249621	237	*	709	ENSG00000118729	116242628	116311402	-	inside	62017	6757	NearestLocation	CASQ2
chr1	116524252	116524451	200	*	710	ENSG00000163393	116519119	116612675	+	inside	5133	5133	NearestLocation	SLC22A15
chr1	116761679	116761878	200	*	711	ENSG00000235933	116706905	116708862	+	downstream	54774	52817	NearestLocation	NA
chr1	116861331	116861899	569	*	712	ENSG00000221040	116821228	116821442	+	downstream	40103	39889	NearestLocation	NA
chr1	116877722	116878228	507	*	713	ENSG00000163399	116915290	116952883	+	upstream	-37568	37062	NearestLocation	ATP1A1
chr1	116924955	116925259	305	*	714	ENSG00000269279	116915890	116926718	-	inside	1763	1459	NearestLocation	NA
chr1	116925571	116925881	311	*	715	ENSG00000269279	116915890	116926718	-	inside	1147	837	NearestLocation	NA
chr1	116940428	116940732	305	*	716	ENSG00000269279	116915890	116926718	-	upstream	-13710	13710	NearestLocation	NA
chr1	116947814	116948127	314	*	717	ENSG00000212385	116956388	116956491	-	downstream	8677	8261	NearestLocation	RNU6-817P
chr1	116958355	116958969	615	*	718	ENSG00000212385	116956388	116956491	-	upstream	-1864	1864	NearestLocation	RNU6-817P
chr1	116996729	116996928	200	*	719	ENSG00000200547	116995158	116995249	+	downstream	1571	1480	NearestLocation	NA
chr1	117006408	117006690	283	*	720	ENSG00000200547	116995158	116995249	+	downstream	11250	11159	NearestLocation	NA
chr1	117026268	117026554	287	*	721	ENSG00000233154	116966346	117021464	-	upstream	-4804	4804	NearestLocation	LINC01762
chr1	117027807	117028083	277	*	722	ENSG00000233154	116966346	117021464	-	upstream	-6343	6343	NearestLocation	LINC01762
chr1	117046668	117047006	339	*	723	ENSG00000224950	117035645	117041834	-	upstream	-4834	4834	NearestLocation	NA
chr1	117190894	117191232	339	*	724	ENSG00000143061	117117031	117210375	-	inside	19481	19143	NearestLocation	IGSF3
chr1	117301054	117301254	201	*	725	ENSG00000116824	117297007	117311850	+	inside	4047	4047	NearestLocation	CD2
chr1	117744887	117745246	360	*	726	ENSG00000134258	117686209	117753556	-	inside	8669	8310	NearestLocation	VTCN1
chr1	117811504	117811905	402	*	727	ENSG00000235202	117838142	117863958	+	upstream	-26638	26237	NearestLocation	LINC01525
chr1	117827178	117827470	293	*	728	ENSG00000235202	117838142	117863958	+	upstream	-10964	10672	NearestLocation	LINC01525
chr1	117842871	117843112	242	*	729	ENSG00000235202	117838142	117863958	+	inside	4729	4729	NearestLocation	LINC01525
chr1	117882370	117882833	464	*	730	ENSG00000271427	117907521	117908095	-	downstream	25725	24688	NearestLocation	NA
chr1	117887742	117888085	344	*	731	ENSG00000271427	117907521	117908095	-	downstream	20353	19436	NearestLocation	NA
chr1	118155240	118155589	350	*	732	ENSG00000183508	118148556	118170994	+	inside	6684	6684	NearestLocation	TENT5C
chr1	118275032	118275360	329	*	733	ENSG00000270719	118242651	118242864	-	upstream	-32168	32168	NearestLocation	NA
chr1	118358344	118358672	329	*	734	ENSG00000228217	118320709	118321128	-	upstream	-37216	37216	NearestLocation	NA
chr1	118841119	118841384	266	*	735	ENSG00000222209	118806995	118807112	-	upstream	-34007	34007	NearestLocation	RNA5SP56
chr1	118865232	118865468	237	*	736	ENSG00000222209	118806995	118807112	-	upstream	-58120	58120	NearestLocation	RNA5SP56
chr1	119046854	119047255	402	*	737	ENSG00000226126	119156956	119158269	-	downstream	111415	109701	NearestLocation	PSMC1P12
chr1	119202297	119202666	370	*	738	ENSG00000226126	119156956	119158269	-	upstream	-44028	44028	NearestLocation	PSMC1P12
chr1	119636267	119636471	205	*	739	ENSG00000223575	119627621	119628577	-	upstream	-7690	7690	NearestLocation	NA
chr1	119753780	119753979	200	*	740	ENSG00000227056	119761937	119762719	-	downstream	8939	7958	NearestLocation	RPL6P2
chr1	120026451	120026820	370	*	741	ENSG00000229570	120038459	120039464	-	downstream	13013	11639	NearestLocation	GAPDHP58
chr1	120031876	120032165	290	*	742	ENSG00000229570	120038459	120039464	-	downstream	7588	6294	NearestLocation	GAPDHP58
chr1	120060336	120060748	413	*	743	ENSG00000203857	120049821	120057681	+	downstream	10515	2655	NearestLocation	HSD3B1
chr1	120383420	120383659	240	*	744	ENSG00000215864	120377388	120387779	-	inside	4359	4120	NearestLocation	NBPF7
chr1	120537766	120537965	200	*	745	ENSG00000134250	120454176	120612240	-	inside	74474	74275	NearestLocation	NOTCH2
chr1	120595810	120596042	233	*	746	ENSG00000134250	120454176	120612240	-	inside	16430	16198	NearestLocation	NOTCH2
chr1	120654384	120654700	317	*	747	ENSG00000207149	120669562	120669662	+	upstream	-15178	14862	NearestLocation	RNU6-465P
chr1	120810609	120810925	317	*	748	ENSG00000188610	120837756	120855681	+	upstream	-27147	26831	NearestLocation	FAM72B
chr1	121088612	121088862	251	*	749	ENSG00000171943	121107124	121129949	+	upstream	-18512	18262	NearestLocation	SRGAP2C
chr1	121141581	121141802	222	*	750	ENSG00000230806	121102017	121140666	-	upstream	-915	915	NearestLocation	SRGAP2-AS1
chr1	143403450	143403809	360	*	751	ENSG00000266811	143424141	143424215	-	downstream	20765	20332	NearestLocation	NA
chr1	143888418	143888642	225	*	752	ENSG00000263497	143876891	143876982	-	upstream	-11436	11436	NearestLocation	NA
chr1	143941134	143941540	407	*	753	ENSG00000196369	143913615	144094424	+	inside	27519	27519	NearestLocation	SRGAP2B
chr1	143942375	143942577	203	*	754	ENSG00000196369	143913615	144094424	+	inside	28760	28760	NearestLocation	SRGAP2B
chr1	144036829	144037107	279	*	755	ENSG00000271644	144043972	144044082	-	downstream	7253	6865	NearestLocation	NA
chr1	144047221	144047450	230	*	756	ENSG00000271644	144043972	144044082	-	upstream	-3139	3139	NearestLocation	NA
chr1	144047725	144047986	262	*	757	ENSG00000271644	144043972	144044082	-	upstream	-3643	3643	NearestLocation	NA
chr1	144062125	144062562	438	*	758	ENSG00000271644	144043972	144044082	-	upstream	-18043	18043	NearestLocation	NA
chr1	144163035	144163267	233	*	759	ENSG00000162825	144146808	144224481	+	inside	16227	16227	NearestLocation	NBPF20
chr1	144204327	144204633	307	*	760	ENSG00000162825	144146808	144224481	+	inside	57519	19848	NearestLocation	NBPF20
chr1	144518200	144518399	200	*	761	ENSG00000236943	144456138	144521970	-	inside	3770	3571	NearestLocation	NA
chr1	144603564	144604006	443	*	762	ENSG00000203843	144612266	144612683	-	downstream	9119	8260	NearestLocation	NA
chr1	144681483	144681683	201	*	763	ENSG00000215861	144676874	144679969	-	upstream	-1514	1514	NearestLocation	NA
chr1	144697365	144697575	211	*	764	ENSG00000215861	144676874	144679969	-	upstream	-17396	17396	NearestLocation	NA
chr1	144941353	144941572	220	*	765	ENSG00000222788	144944672	144944750	+	upstream	-3319	3100	NearestLocation	NA
chr1	144967242	144967506	265	*	766	ENSG00000268172	144989309	144991365	+	upstream	-22067	21803	NearestLocation	NA
chr1	145165014	145165354	341	*	767	ENSG00000201789	145149740	145149840	-	upstream	-15174	15174	NearestLocation	RNU6-1071P
chr1	145313949	145314154	206	*	768	ENSG00000163386	145289772	145370303	+	inside	24177	24177	NearestLocation	NA
chr1	145323511	145323810	300	*	769	ENSG00000163386	145289772	145370303	+	inside	33739	33739	NearestLocation	NA
chr1	145356287	145356513	227	*	770	ENSG00000233396	145373054	145382434	-	downstream	26147	16541	NearestLocation	NA
chr1	145365541	145365774	234	*	771	ENSG00000233396	145373054	145382434	-	downstream	16893	7280	NearestLocation	NA
chr1	145365959	145366188	230	*	772	ENSG00000233396	145373054	145382434	-	downstream	16475	6866	NearestLocation	NA
chr1	145382910	145383245	336	*	773	ENSG00000201558	145382757	145382920	+	overlapEnd	153	10	NearestLocation	RNVU1-6
chr1	145398991	145399358	368	*	774	ENSG00000168509	145413095	145417545	+	upstream	-14104	13737	NearestLocation	HJV
chr1	145455296	145455633	338	*	775	ENSG00000121851	145456236	145470388	-	downstream	15092	603	NearestLocation	POLR3GL
chr1	145502196	145502532	337	*	776	ENSG00000131795	145507598	145513536	+	upstream	-5402	5066	NearestLocation	NA
chr1	145507438	145507770	333	*	777	ENSG00000131795	145507598	145513536	+	overlapStart	-160	160	NearestLocation	NA
chr1	145738958	145739352	395	*	778	ENSG00000174827	145726918	145764074	+	inside	12040	12040	NearestLocation	PDZK1
chr1	146036485	146036915	431	*	779	ENSG00000227216	146059926	146060343	+	upstream	-23441	23011	NearestLocation	NA
chr1	146068670	146068982	313	*	780	ENSG00000198658	146076838	146080009	+	upstream	-8168	7856	NearestLocation	NA
chr1	146119462	146119698	237	*	781	ENSG00000238765	146124161	146124283	+	upstream	-4699	4463	NearestLocation	RNA5SP57
chr1	146305795	146305994	200	*	782	ENSG00000239475	146310555	146349531	+	upstream	-4760	4561	NearestLocation	NA
chr1	146342708	146343398	691	*	783	ENSG00000186275	146373546	146467744	+	upstream	-30838	30148	NearestLocation	NA
chr1	146383625	146384128	504	*	784	ENSG00000244371	146392310	146392852	-	downstream	9227	8182	NearestLocation	NA
chr1	146578085	146578329	245	*	785	ENSG00000227242	146490895	146596107	-	inside	18022	17778	NearestLocation	NA
chr1	146643920	146644215	296	*	786	ENSG00000131791	146626685	146644129	-	overlapStart	209	86	NearestLocation	PRKAB2
chr1	146711986	146712285	300	*	787	ENSG00000131778	146714291	146767443	+	upstream	-2305	2006	NearestLocation	CHD1L
chr1	147037129	147037357	229	*	788	ENSG00000116128	147013182	147098017	+	inside	23947	23947	NearestLocation	BCL9
chr1	147052913	147053112	200	*	789	ENSG00000116128	147013182	147098017	+	inside	39731	39731	NearestLocation	BCL9
chr1	147142420	147142625	206	*	790	ENSG00000162836	147101453	147142618	-	overlapStart	198	7	NearestLocation	ACP6
chr1	147206535	147206802	268	*	791	ENSG00000234482	147229426	147230517	+	upstream	-22891	22624	NearestLocation	NA
chr1	147221032	147221407	376	*	792	ENSG00000234482	147229426	147230517	+	upstream	-8394	8019	NearestLocation	NA
chr1	147283452	147283783	332	*	793	ENSG00000223728	147313096	147314493	+	upstream	-29644	29313	NearestLocation	LOC391092
chr1	147320013	147320310	298	*	794	ENSG00000223728	147313096	147314493	+	downstream	6917	5520	NearestLocation	LOC391092
chr1	147578275	147578561	287	*	795	ENSG00000225080	147601780	147602181	+	upstream	-23505	23219	NearestLocation	NA
chr1	147610542	147610794	253	*	796	ENSG00000203835	147618673	147621845	+	upstream	-8131	7879	NearestLocation	NA
chr1	147770326	147770525	200	*	797	ENSG00000244252	147767899	147769378	-	upstream	-948	948	NearestLocation	NA
chr1	147806531	147806796	266	*	798	ENSG00000202408	147806736	147806886	-	overlapEnd	355	60	NearestLocation	RNVU1-21
chr1	148005899	148006174	276	*	799	ENSG00000223491	148000213	148000494	+	downstream	5686	5405	NearestLocation	NA
chr1	148006924	148007164	241	*	800	ENSG00000223491	148000213	148000494	+	downstream	6711	6430	NearestLocation	NA
chr1	148013192	148013503	312	*	801	ENSG00000122497	148003642	148025863	-	inside	12671	9550	NearestLocation	NA
chr1	148241494	148241758	265	*	802	ENSG00000207501	148241465	148241628	+	overlapEnd	29	29	NearestLocation	RNVU1-14
chr1	148247758	148247957	200	*	803	ENSG00000236140	148246959	148248104	-	inside	346	147	NearestLocation	NA
chr1	148248053	148248396	344	*	804	ENSG00000236140	148246959	148248104	-	overlapStart	51	51	NearestLocation	NA
chr1	148327168	148327476	309	*	805	ENSG00000203832	148250249	148347506	-	inside	20338	20030	NearestLocation	NA
chr1	148356683	148357263	581	*	806	ENSG00000234367	148349256	148349657	+	downstream	7427	7026	NearestLocation	NA
chr1	148538398	148538611	214	*	807	ENSG00000229002	148542873	148545128	+	upstream	-4475	4262	NearestLocation	NA
chr1	148566006	148566269	264	*	808	ENSG00000227212	148574653	148575051	-	downstream	9045	8384	NearestLocation	NA
chr1	148598166	148598415	250	*	809	ENSG00000237253	148598398	148599531	+	overlapStart	-232	17	NearestLocation	NA
chr1	148604763	148605035	273	*	810	ENSG00000207205	148604908	148605072	-	overlapEnd	309	37	NearestLocation	RNVU1-15
chr1	148742103	148742314	212	*	811	ENSG00000203827	148739443	148758311	+	inside	2660	2660	NearestLocation	NA
chr1	148760126	148760374	249	*	812	ENSG00000237343	148760504	148761583	+	upstream	-378	130	NearestLocation	NA
chr1	148787870	148788082	213	*	813	ENSG00000270239	148778320	148778606	+	downstream	9550	9264	NearestLocation	NA
chr1	148856961	148857226	266	*	814	ENSG00000231448	148854138	148891740	+	inside	2823	2823	NearestLocation	NA
chr1	149223213	149224274	1062	*	815	ENSG00000206737	149224058	149224221	-	includeFeature	1008	53	NearestLocation	RNVU1-18
chr1	149275268	149275467	200	*	816	ENSG00000270962	149279016	149279311	+	upstream	-3748	3549	NearestLocation	NA
chr1	149368139	149368458	320	*	817	ENSG00000253193	149369294	149378365	+	upstream	-1155	836	NearestLocation	NA
chr1	149441778	149442057	280	*	818	ENSG00000268074	149424566	149424954	-	upstream	-16824	16824	NearestLocation	RPL22P5
chr1	149602580	149602779	200	*	819	ENSG00000232151	149605640	149633208	+	upstream	-3060	2861	NearestLocation	NA
chr1	149605989	149606249	261	*	820	ENSG00000202496	149605917	149606079	+	overlapEnd	72	72	NearestLocation	NA
chr1	149664484	149664882	399	*	821	ENSG00000237168	149664577	149664889	+	overlapStart	-93	7	NearestLocation	NA
chr1	149718322	149718548	227	*	822	ENSG00000234232	149649060	149719362	-	inside	1040	814	NearestLocation	NA
chr1	149856797	149857141	345	*	823	ENSG00000184678	149856010	149858232	-	inside	1435	787	NearestLocation	H2BC21
chr1	150137927	150138174	248	*	824	ENSG00000023902	150121373	150136916	+	downstream	16554	1011	NearestLocation	PLEKHO1
chr1	150208255	150208499	245	*	825	ENSG00000143401	150190717	150208504	-	inside	249	5	NearestLocation	ANP32E
chr1	150228232	150228431	200	*	826	ENSG00000118298	150229554	150237478	+	upstream	-1322	1123	NearestLocation	CA14
chr1	150230155	150230474	320	*	827	ENSG00000271845	150227489	150229681	-	upstream	-474	474	NearestLocation	NA
chr1	150254999	150255198	200	*	828	ENSG00000159208	150254953	150259505	+	inside	46	46	NearestLocation	CIART
chr1	150336142	150336341	200	*	829	ENSG00000163125	150335567	150449042	+	inside	575	575	NearestLocation	RPRD2
chr1	150459717	150460254	538	*	830	ENSG00000143374	150459887	150480078	+	overlapStart	-170	170	NearestLocation	TARS2
chr1	150551865	150552096	232	*	831	ENSG00000143384	150547032	150552066	-	overlapStart	201	30	NearestLocation	MCL1
chr1	150607469	150607857	389	*	832	ENSG00000143420	150573327	150602088	-	upstream	-5381	5381	NearestLocation	ENSA
chr1	150849302	150849633	332	*	833	ENSG00000143437	150782181	150849244	-	upstream	-58	58	NearestLocation	ARNT
chr1	150898810	150899062	253	*	834	ENSG00000143379	150898739	150937213	+	inside	71	71	NearestLocation	SETDB1
chr1	150986009	150986386	378	*	835	ENSG00000143363	150980896	151008189	+	inside	5113	5113	NearestLocation	PRUNE1
chr1	151012018	151012316	299	*	836	ENSG00000163141	151009046	151020076	+	inside	2972	2972	NearestLocation	BNIPL
chr1	151042995	151043237	243	*	837	ENSG00000143458	151043054	151098018	+	overlapStart	-59	59	NearestLocation	GABPB2
chr1	151254038	151254690	653	*	838	ENSG00000143373	151254094	151264656	+	overlapStart	-56	56	NearestLocation	ZNF687
chr1	151475272	151475471	200	*	839	ENSG00000143375	151482986	151511168	+	upstream	-7714	7515	NearestLocation	CGN
chr1	151568954	151569273	320	*	840	ENSG00000143376	151584541	151671567	+	upstream	-15587	15268	NearestLocation	SNX27
chr1	151763046	151763473	428	*	841	ENSG00000203288	151763280	151766878	+	overlapStart	-234	193	NearestLocation	TDRKH-AS1
chr1	151882154	151882416	263	*	842	ENSG00000159445	151846060	151882284	-	overlapStart	130	130	NearestLocation	THEM4
chr1	151960860	151961140	281	*	843	ENSG00000197747	151955391	151966866	-	inside	6006	5469	NearestLocation	S100A10
chr1	151975433	151975760	328	*	844	ENSG00000229021	151967007	152015250	+	inside	8426	8426	NearestLocation	NA
chr1	152020557	152021026	470	*	845	ENSG00000163191	152004982	152020383	-	upstream	-174	174	NearestLocation	S100A11
chr1	153127750	153127966	217	*	846	ENSG00000159516	153122058	153123345	-	upstream	-4405	4405	NearestLocation	SPRR2G
chr1	153193236	153193617	382	*	847	ENSG00000203783	153190060	153191793	+	downstream	3176	1443	NearestLocation	PRR9
chr1	153310686	153311050	365	*	848	ENSG00000207321	153304098	153304204	+	downstream	6588	6482	NearestLocation	RNU6-160P
chr1	153316144	153316559	416	*	849	ENSG00000163218	153302596	153321316	-	inside	5172	4757	NearestLocation	PGLYRP4
chr1	153392975	153393179	205	*	850	ENSG00000184330	153389000	153395701	+	inside	3975	2522	NearestLocation	S100A7A
chr1	153551043	153551300	258	*	851	ENSG00000196754	153533584	153540366	-	upstream	-10677	10677	NearestLocation	S100A2
chr1	153606557	153606783	227	*	852	ENSG00000189171	153591263	153606568	-	overlapStart	11	11	NearestLocation	S100A13
chr1	153643567	153644030	464	*	853	ENSG00000143621	153634512	153643524	-	upstream	-43	43	NearestLocation	ILF2
chr1	153860997	153861231	235	*	854	ENSG00000236327	153863071	153863341	+	upstream	-2074	1840	NearestLocation	NA
chr1	153963195	153963650	456	*	855	ENSG00000177954	153963235	153964626	+	overlapStart	-40	40	NearestLocation	RPS27
chr1	153974065	153974456	392	*	856	ENSG00000252669	153970517	153970627	-	upstream	-3438	3438	NearestLocation	NA
chr1	154244812	154245016	205	*	857	ENSG00000143575	154244987	154248351	+	overlapStart	-175	29	NearestLocation	HAX1
chr1	154293312	154293743	432	*	858	ENSG00000143595	154293566	154297801	+	overlapStart	-254	177	NearestLocation	AQP10
chr1	154326081	154326280	200	*	859	ENSG00000238365	154311219	154311278	+	downstream	14862	14803	NearestLocation	RNU7-57P
chr1	154456871	154457079	209	*	860	ENSG00000273110	154452488	154453977	+	downstream	4383	2894	NearestLocation	NA
chr1	154599064	154599322	259	*	861	ENSG00000160710	154554538	154600475	-	inside	1411	1153	NearestLocation	ADAR
chr1	154885316	154885540	225	*	862	ENSG00000163344	154897210	154909467	-	downstream	24151	11670	NearestLocation	PMVK
chr1	154946163	154946362	200	*	863	ENSG00000160691	154934774	154946871	-	inside	708	509	NearestLocation	SHC1
chr1	155102350	155102688	339	*	864	ENSG00000169242	155099936	155107333	+	inside	2414	2414	NearestLocation	EFNA1
chr1	155278353	155278781	429	*	865	ENSG00000160752	155278539	155290457	+	overlapStart	-186	186	NearestLocation	FDPS
chr1	155462626	155462943	318	*	866	ENSG00000237872	155402969	155404053	+	downstream	59657	58573	NearestLocation	POU5F1P4
chr1	155569806	155570068	263	*	867	ENSG00000223503	155560392	155561053	-	upstream	-8753	8753	NearestLocation	NA
chr1	155580272	155580541	270	*	868	ENSG00000232519	155579567	155580171	-	upstream	-101	101	NearestLocation	NA
chr1	155668943	155669270	328	*	869	ENSG00000163374	155629237	155658791	-	upstream	-10152	10152	NearestLocation	YY1AP1
chr1	155715181	155715380	200	*	870	ENSG00000227673	155679889	155680354	-	upstream	-34827	34827	NearestLocation	NA
chr1	156023832	156024378	547	*	871	LRG_81	156024517	156028301	+	upstream	-685	139	NearestLocation	NA
chr1	156183054	156183253	200	*	872	ENSG00000160783	156182784	156212874	+	inside	270	270	NearestLocation	PMF1
chr1	156251001	156251309	309	*	873	ENSG00000198952	156219015	156252620	-	inside	1619	1311	NearestLocation	SMG5
chr1	156459070	156459269	200	*	874	ENSG00000206651	156453890	156454002	-	upstream	-5068	5068	NearestLocation	NA
chr1	156493982	156494477	496	*	875	ENSG00000238843	156499122	156499221	+	upstream	-5140	4645	NearestLocation	NA
chr1	156529494	156529806	313	*	876	ENSG00000183856	156495197	156542396	-	inside	12902	12590	NearestLocation	IQGAP3
chr1	156577946	156578154	209	*	877	ENSG00000160818	156564279	156571288	-	upstream	-6658	6658	NearestLocation	GPATCH4
chr1	156586320	156586602	283	*	878	ENSG00000272971	156584534	156585080	-	upstream	-1240	1240	NearestLocation	NA
chr1	156647410	156647609	200	*	879	ENSG00000132688	156638555	156647189	-	upstream	-221	221	NearestLocation	NES
chr1	156658941	156659178	238	*	880	ENSG00000237588	156657487	156661789	-	inside	2848	1454	NearestLocation	NA
chr1	156690941	156691241	301	*	881	ENSG00000143303	156698234	156706752	+	upstream	-7293	6993	NearestLocation	RRNAD1
chr1	156736909	156737170	262	*	882	ENSG00000143321	156711899	156736717	-	upstream	-192	192	NearestLocation	HDGF
chr1	156742524	156742809	286	*	883	ENSG00000143321	156711899	156736717	-	upstream	-5807	5807	NearestLocation	HDGF
chr1	156742882	156743270	389	*	884	ENSG00000143321	156711899	156736717	-	upstream	-6165	6165	NearestLocation	HDGF
chr1	156767044	156767296	253	*	885	ENSG00000198400	156785432	156851642	+	upstream	-18388	18136	NearestLocation	NTRK1
chr1	156771382	156771657	276	*	886	ENSG00000198400	156785432	156851642	+	upstream	-14050	13775	NearestLocation	NTRK1
chr1	156918731	156919177	447	*	887	ENSG00000211581	156905923	156906036	-	upstream	-12695	12695	NearestLocation	MIR765
chr1	157015384	157015585	202	*	888	ENSG00000132694	156904632	157015162	-	upstream	-222	222	NearestLocation	ARHGEF11
chr1	157105360	157105728	369	*	889	ENSG00000117036	157090983	157108266	-	inside	2906	2538	NearestLocation	ETV3
chr1	157339696	157339901	206	*	890	ENSG00000237189	157257493	157257843	-	upstream	-81853	81853	NearestLocation	NA
chr1	157717355	157717563	209	*	891	ENSG00000232366	157693970	157694810	-	upstream	-22545	22545	NearestLocation	VDAC1P9
chr1	157961762	157962062	301	*	892	ENSG00000183853	157963063	158070052	+	upstream	-1301	1001	NearestLocation	KIRREL1
chr1	157972350	157972676	327	*	893	ENSG00000183853	157963063	158070052	+	inside	9287	9287	NearestLocation	KIRREL1
chr1	158504358	158504639	282	*	894	ENSG00000231434	158493462	158495628	+	downstream	10896	8730	NearestLocation	NA
chr1	158618187	158618466	280	*	895	ENSG00000163554	158580496	158656488	-	inside	38301	37691	NearestLocation	SPTA1
chr1	158624486	158624685	200	*	896	ENSG00000163554	158580496	158656488	-	inside	32002	31803	NearestLocation	SPTA1
chr1	159174522	159174736	215	*	897	ENSG00000213088	159173097	159176290	+	inside	1425	1425	NearestLocation	ACKR1
chr1	159886111	159886368	258	*	898	ENSG00000269620	159879884	159880159	-	upstream	-5952	5952	NearestLocation	NA
chr1	159940936	159941161	226	*	899	ENSG00000224259	159931008	159948851	+	inside	9928	7690	NearestLocation	LINC01133
chr1	160001832	160002078	247	*	900	ENSG00000143315	159997462	160001783	-	upstream	-49	49	NearestLocation	PIGM
chr1	160026461	160026738	278	*	901	ENSG00000225279	160032278	160049611	+	upstream	-5817	5540	NearestLocation	NA
chr1	160179376	160179779	404	*	902	ENSG00000227741	160171989	160178659	-	upstream	-717	717	NearestLocation	LOC729867
chr1	160386108	160386354	247	*	903	ENSG00000162738	160370376	160398468	+	inside	15732	12114	NearestLocation	VANGL2
chr1	160428921	160429146	226	*	904	ENSG00000223009	160473166	160473246	-	downstream	44325	44020	NearestLocation	NA
chr1	160509964	160510166	203	*	905	ENSG00000234425	160506863	160541248	+	inside	3101	3101	NearestLocation	NA
chr1	160576820	160577136	317	*	906	ENSG00000066294	160510885	160549306	-	upstream	-27514	27514	NearestLocation	CD84
chr1	160621900	160622427	528	*	907	ENSG00000117090	160577890	160617085	-	upstream	-4815	4815	NearestLocation	SLAMF1
chr1	160874601	160874973	373	*	908	ENSG00000213080	160864770	160865866	+	downstream	9831	8735	NearestLocation	NA
chr1	160881237	160881680	444	*	909	ENSG00000213080	160864770	160865866	+	downstream	16467	15371	NearestLocation	NA
chr1	160918882	160919500	619	*	910	ENSG00000158764	160914815	160924589	-	inside	5707	4067	NearestLocation	ITLN2
chr1	160921178	160921445	268	*	911	ENSG00000158764	160914815	160924589	-	inside	3411	3144	NearestLocation	ITLN2
chr1	160967124	160967477	354	*	912	ENSG00000158769	160965001	160991138	-	inside	24014	2123	NearestLocation	F11R
chr1	160978630	160979030	401	*	913	ENSG00000158769	160965001	160991138	-	inside	12508	12108	NearestLocation	F11R
chr1	161015849	161016115	267	*	914	ENSG00000158773	161009041	161015767	-	upstream	-82	82	NearestLocation	USF1
chr1	161067387	161067655	269	*	915	ENSG00000162755	161068151	161070136	+	upstream	-764	496	NearestLocation	KLHDC9
chr1	161102409	161103048	640	*	916	ENSG00000158796	161090764	161102478	-	overlapStart	69	69	NearestLocation	DEDD
chr1	161147383	161147717	335	*	917	ENSG00000158850	161141100	161147287	-	upstream	-96	96	NearestLocation	B4GALT3
chr1	161171809	161172118	310	*	918	ENSG00000158859	161154098	161168846	-	upstream	-2963	2963	NearestLocation	ADAMTS4
chr1	161369365	161369724	360	*	919	ENSG00000206921	161371079	161371185	+	upstream	-1714	1355	NearestLocation	RNU6-481P
chr1	161414572	161414923	352	*	920	ENSG00000215840	161375858	161376872	+	downstream	38714	37700	NearestLocation	NA
chr1	161735971	161736336	366	*	921	ENSG00000226889	161735115	161736017	-	overlapStart	46	46	NearestLocation	NA
chr1	161761201	161761468	268	*	922	ENSG00000118217	161736084	161933860	+	inside	25117	25117	NearestLocation	ATF6
chr1	162004453	162004776	324	*	923	ENSG00000227818	162008806	162009357	+	upstream	-4353	4030	NearestLocation	NA
chr1	162145298	162145609	312	*	924	ENSG00000266144	162126897	162126972	+	downstream	18401	18326	NearestLocation	MIR4654
chr1	162161229	162161550	322	*	925	ENSG00000266144	162126897	162126972	+	downstream	34332	34257	NearestLocation	MIR4654
chr1	162162980	162163372	393	*	926	ENSG00000266144	162126897	162126972	+	downstream	36083	36008	NearestLocation	MIR4654
chr1	162188661	162188976	316	*	927	ENSG00000266144	162126897	162126972	+	downstream	61764	61689	NearestLocation	MIR4654
chr1	162361774	162362079	306	*	928	ENSG00000171722	162342993	162346660	-	upstream	-15114	15114	NearestLocation	SPATA46
chr1	162367894	162368176	283	*	929	ENSG00000198574	162365056	162381928	-	inside	14034	2838	NearestLocation	SH2D1B
chr1	162666288	162666580	293	*	930	ENSG00000162733	162601163	162757190	+	inside	65125	65125	NearestLocation	DDR2
chr1	162859927	162860218	292	*	931	ENSG00000185860	162794248	162838605	-	upstream	-21322	21322	NearestLocation	CCDC190
chr1	163165814	163166125	312	*	932	ENSG00000232892	163131465	163182813	+	inside	34349	16688	NearestLocation	RGS5-AS1
chr1	163172751	163173243	493	*	933	ENSG00000225755	163207004	163208987	+	upstream	-34253	33761	NearestLocation	NA
chr1	164034400	164034863	464	*	934	ENSG00000212538	163892907	163893109	+	downstream	141493	141291	NearestLocation	NA
chr1	164351689	164352178	490	*	935	ENSG00000213070	164326004	164326601	+	downstream	25685	25088	NearestLocation	HMGB3P6
chr1	164681464	164681941	478	*	936	ENSG00000269887	164649322	164650036	+	downstream	32142	31428	NearestLocation	NA
chr1	164741790	164742327	538	*	937	ENSG00000233693	164738353	164743878	-	inside	2088	1551	NearestLocation	PBX1-AS1
chr1	164744121	164744570	450	*	938	ENSG00000233693	164738353	164743878	-	upstream	-243	243	NearestLocation	PBX1-AS1
chr1	164793311	164793532	222	*	939	ENSG00000271917	164797673	164799189	+	upstream	-4362	4141	NearestLocation	NA
chr1	164793830	164794278	449	*	940	ENSG00000271917	164797673	164799189	+	upstream	-3843	3395	NearestLocation	NA
chr1	164810532	164811125	594	*	941	ENSG00000201987	164823468	164823569	+	upstream	-12936	12343	NearestLocation	NA
chr1	164827516	164827819	304	*	942	ENSG00000201987	164823468	164823569	+	downstream	4048	3947	NearestLocation	NA
chr1	164864494	164864935	442	*	943	ENSG00000225487	164890555	164890866	-	downstream	26372	25620	NearestLocation	NA
chr1	164880503	164880731	229	*	944	ENSG00000225487	164890555	164890866	-	downstream	10363	9824	NearestLocation	NA
chr1	164940686	164940933	248	*	945	ENSG00000201270	164949272	164949374	-	downstream	8688	8339	NearestLocation	RNU6-755P
chr1	165379278	165379590	313	*	946	ENSG00000143171	165370159	165414433	-	inside	35155	9119	NearestLocation	RXRG
chr1	165429689	165429976	288	*	947	ENSG00000143171	165370159	165414433	-	upstream	-15256	15256	NearestLocation	RXRG
chr1	165455026	165455319	294	*	948	ENSG00000230748	165466961	165467585	+	upstream	-11935	11642	NearestLocation	NA
chr1	165600482	165600815	334	*	949	ENSG00000143198	165600098	165631033	+	inside	384	384	NearestLocation	MGST3
chr1	165738292	165738741	450	*	950	ENSG00000224358	165738166	165744413	+	inside	126	126	NearestLocation	NA
chr1	165785020	165785377	358	*	951	ENSG00000230659	165788590	165789024	+	upstream	-3570	3213	NearestLocation	RPL26P12
chr1	165806437	165806644	208	*	952	ENSG00000143183	165696032	165796992	-	upstream	-9445	9445	NearestLocation	TMCO1
chr1	165811901	165812324	424	*	953	ENSG00000143183	165696032	165796992	-	upstream	-14909	14909	NearestLocation	TMCO1
chr1	165822874	165823526	653	*	954	ENSG00000143183	165696032	165796992	-	upstream	-25882	25882	NearestLocation	TMCO1
chr1	165867267	165867466	200	*	955	ENSG00000236364	165865116	165869920	-	inside	2653	2151	NearestLocation	NA
chr1	165868252	165868451	200	*	956	ENSG00000236364	165865116	165869920	-	inside	1668	1469	NearestLocation	NA
chr1	166579608	166579967	360	*	957	ENSG00000215834	166572912	166600637	+	inside	6696	6696	NearestLocation	FMO9P
chr1	166812892	166813190	299	*	958	ENSG00000143157	166808681	166825581	+	inside	4211	4211	NearestLocation	POGK
chr1	166896526	166896747	222	*	959	ENSG00000237096	166864948	166877317	-	upstream	-19209	19209	NearestLocation	NA
chr1	167052413	167052660	248	*	960	ENSG00000143167	167022073	167059868	-	inside	7455	7208	NearestLocation	GPA33
chr1	167502948	167503258	311	*	961	ENSG00000227776	167488773	167489823	+	downstream	14175	13125	NearestLocation	NA
chr1	167511784	167511983	200	*	962	ENSG00000143162	167498914	167523004	-	inside	11220	11021	NearestLocation	CREG1
chr1	167604523	167604983	461	*	963	ENSG00000241666	167596622	167599911	-	upstream	-4612	4612	NearestLocation	NA
chr1	167639088	167639360	273	*	964	ENSG00000241666	167596622	167599911	-	upstream	-39177	39177	NearestLocation	NA
chr1	167653405	167653607	203	*	965	ENSG00000197965	167690429	167761156	+	upstream	-37024	36822	NearestLocation	MPZL1
chr1	167838647	167839311	665	*	966	ENSG00000143199	167778625	167883453	-	inside	44806	44142	NearestLocation	ADCY10
chr1	168056839	168057202	364	*	967	ENSG00000224837	168025139	168025660	-	upstream	-31179	31179	NearestLocation	NA
chr1	168111233	168111432	200	*	968	ENSG00000143147	168053997	168106821	-	upstream	-4412	4412	NearestLocation	GPR161
chr1	168137037	168137300	264	*	969	ENSG00000143155	168148171	168169950	+	upstream	-11134	10871	NearestLocation	TIPRL
chr1	168312007	168312258	252	*	970	ENSG00000227722	168338292	168338839	+	upstream	-26285	26034	NearestLocation	NA
chr1	168330008	168330235	228	*	971	ENSG00000227722	168338292	168338839	+	upstream	-8284	8057	NearestLocation	NA
chr1	168332392	168332666	275	*	972	ENSG00000227722	168338292	168338839	+	upstream	-5900	5626	NearestLocation	NA
chr1	168335332	168335562	231	*	973	ENSG00000227722	168338292	168338839	+	upstream	-2960	2730	NearestLocation	NA
chr1	168342250	168342544	295	*	974	ENSG00000207974	168344762	168344859	+	upstream	-2512	2218	NearestLocation	MIR557
chr1	168467400	168467832	433	*	975	ENSG00000237658	168433452	168464882	-	upstream	-2518	2518	NearestLocation	NA
chr1	168515274	168515543	270	*	976	ENSG00000143185	168510003	168513235	-	upstream	-2039	2039	NearestLocation	XCL2
chr1	168568920	168569142	223	*	977	ENSG00000229757	168547891	168548677	-	upstream	-20243	20243	NearestLocation	RPL7AP21
chr1	168572849	168573169	321	*	978	ENSG00000229757	168547891	168548677	-	upstream	-24172	24172	NearestLocation	RPL7AP21
chr1	168687482	168687731	250	*	979	ENSG00000143196	168664697	168698502	-	inside	11020	10771	NearestLocation	DPT
chr1	168737092	168737527	436	*	980	ENSG00000235736	168732603	168743728	-	inside	6636	4489	NearestLocation	NA
chr1	168743627	168743867	241	*	981	ENSG00000235736	168732603	168743728	-	overlapStart	101	101	NearestLocation	NA
chr1	168959545	168959858	314	*	982	ENSG00000213063	168907705	168908161	+	downstream	51840	51384	NearestLocation	NA
chr1	168997315	168997727	413	*	983	ENSG00000252987	169036502	169036602	+	upstream	-39187	38775	NearestLocation	RNA5SP66
chr1	169030289	169030499	211	*	984	ENSG00000252987	169036502	169036602	+	upstream	-6213	6003	NearestLocation	RNA5SP66
chr1	169056292	169056636	345	*	985	ENSG00000203601	168873143	169056243	-	upstream	-49	49	NearestLocation	LINC00970
chr1	169162642	169163018	377	*	986	ENSG00000143153	169074935	169101960	+	downstream	87707	60682	NearestLocation	ATP1B1
chr1	169336725	169337037	313	*	987	ENSG00000143156	169101769	169337205	-	inside	480	168	NearestLocation	NME7
chr1	169556085	169556430	346	*	988	ENSG00000198734	169483404	169555826	-	upstream	-259	259	NearestLocation	F5
chr1	169573330	169573529	200	*	989	ENSG00000198734	169483404	169555826	-	upstream	-17504	17504	NearestLocation	F5
chr1	169847678	169847996	319	*	990	ENSG00000000457	169818772	169863408	-	inside	15730	15412	NearestLocation	SCYL3
chr1	170043470	170043807	338	*	991	ENSG00000075945	169890467	170054349	-	inside	10879	10542	NearestLocation	KIFAP3
chr1	170115177	170115596	420	*	992	ENSG00000203740	170115142	170136931	+	inside	35	35	NearestLocation	METTL11B
chr1	170189990	170190189	200	*	993	ENSG00000238051	170180151	170180598	-	upstream	-9392	9392	NearestLocation	ISCUP1
chr1	170841054	170841253	200	*	994	ENSG00000117501	170904612	171033906	+	upstream	-63558	63359	NearestLocation	MROH9
chr1	170898965	170899330	366	*	995	ENSG00000117501	170904612	171033906	+	upstream	-5647	5282	NearestLocation	MROH9
chr1	170938679	170938928	250	*	996	ENSG00000117501	170904612	171033906	+	inside	34067	34067	NearestLocation	MROH9
chr1	171366117	171366491	375	*	997	ENSG00000239428	171361368	171361929	+	downstream	4749	4188	NearestLocation	GM2AP2
chr1	171454327	171454656	330	*	998	ENSG00000117523	171454651	171562650	+	overlapStart	-324	5	NearestLocation	PRRC2C
chr1	171584308	171584507	200	*	999	ENSG00000034971	171604557	171621823	-	downstream	37515	20050	NearestLocation	MYOC
chr1	171711292	171711491	200	*	1000	ENSG00000117533	171669300	171711387	-	overlapStart	95	95	NearestLocation	VAMP4
chr1	171750247	171750572	326	*	1001	ENSG00000010165	171750788	171783163	+	upstream	-541	216	NearestLocation	EEF1AKNMT
chr1	172243409	172243613	205	*	1002	ENSG00000252354	172317283	172317357	+	upstream	-73874	73670	NearestLocation	NA
chr1	172421820	172422280	461	*	1003	ENSG00000135845	172339329	172413230	-	upstream	-8590	8590	NearestLocation	PIGC
chr1	173272240	173272668	429	*	1004	ENSG00000251817	173250216	173250309	+	downstream	22024	21931	NearestLocation	NA
chr1	173362372	173362658	287	*	1005	ENSG00000231615	173331536	173332872	-	upstream	-29500	29500	NearestLocation	LOC646870
chr1	173443824	173444417	594	*	1006	ENSG00000117592	173446405	173457946	+	upstream	-2581	1988	NearestLocation	PRDX6
chr1	173572421	173572770	350	*	1007	ENSG00000162753	173469603	173572233	-	upstream	-188	188	NearestLocation	SLC9C2
chr1	173684004	173684296	293	*	1008	ENSG00000076321	173684080	173755840	+	overlapStart	-76	76	NearestLocation	KLHL20
chr1	173793389	173794324	936	*	1009	ENSG00000117593	173793641	173827684	+	overlapStart	-252	252	NearestLocation	DARS2
chr1	174081973	174082291	319	*	1010	ENSG00000225713	174059274	174059612	-	upstream	-22361	22361	NearestLocation	RPL30P1
chr1	174087910	174088250	341	*	1011	ENSG00000225713	174059274	174059612	-	upstream	-28298	28298	NearestLocation	RPL30P1
chr1	174662305	174662504	200	*	1012	ENSG00000223828	174725988	174726257	-	downstream	63952	63484	NearestLocation	NA
chr1	175403314	175403526	213	*	1013	ENSG00000235628	175507911	175525954	-	downstream	122640	104385	NearestLocation	NA
chr1	175515619	175515936	318	*	1014	ENSG00000235628	175507911	175525954	-	inside	10335	7708	NearestLocation	NA
chr1	175560434	175560980	547	*	1015	ENSG00000235628	175507911	175525954	-	upstream	-34480	34480	NearestLocation	NA
chr1	175771895	175772257	363	*	1016	ENSG00000116147	175284330	175712906	-	upstream	-58989	58989	NearestLocation	TNR
chr1	175793218	175793558	341	*	1017	ENSG00000224718	175846479	175849604	+	upstream	-53261	52921	NearestLocation	LINC01657
chr1	176027574	176027801	228	*	1018	ENSG00000228686	175986413	175987896	+	downstream	41161	39678	NearestLocation	NA
chr1	176333558	176333869	312	*	1019	ENSG00000225904	176336835	176337537	-	downstream	3979	2966	NearestLocation	NA
chr1	176570551	176570910	360	*	1020	ENSG00000237514	176585404	176585925	-	downstream	15374	14494	NearestLocation	NA
chr1	176625379	176625782	404	*	1021	ENSG00000237514	176585404	176585925	-	upstream	-39454	39454	NearestLocation	NA
chr1	176639005	176639284	280	*	1022	ENSG00000237514	176585404	176585925	-	upstream	-53080	53080	NearestLocation	NA
chr1	176872770	176872969	200	*	1023	ENSG00000202609	176998499	176998581	-	downstream	125811	125530	NearestLocation	MIR488
chr1	177271556	177271950	395	*	1024	ENSG00000224968	177320722	177335408	+	upstream	-49166	48772	NearestLocation	LINC01645
chr1	177494340	177494757	418	*	1025	ENSG00000266393	177522005	177522095	+	upstream	-27665	27248	NearestLocation	NA
chr1	178279843	178280127	285	*	1026	ENSG00000213058	178380751	178381107	+	upstream	-100908	100624	NearestLocation	NA
chr1	178475834	178476146	313	*	1027	ENSG00000240021	178482212	178517734	+	upstream	-6378	6066	NearestLocation	TEX35
chr1	178695303	178695551	249	*	1028	ENSG00000273062	178693441	178695420	-	overlapStart	117	117	NearestLocation	NA
chr1	178995822	178996056	235	*	1029	ENSG00000116199	178994939	179045697	+	inside	883	883	NearestLocation	FAM20B
chr1	179016411	179016881	471	*	1030	ENSG00000232750	179004444	179004787	-	upstream	-11624	11624	NearestLocation	NA
chr1	179262477	179262744	268	*	1031	ENSG00000057252	179262925	179327815	+	upstream	-448	181	NearestLocation	SOAT1
chr1	179322735	179322989	255	*	1032	ENSG00000263633	179333448	179333743	+	upstream	-10713	10459	NearestLocation	NA
chr1	179851862	179852061	200	*	1033	ENSG00000272906	179850742	179851730	-	upstream	-132	132	NearestLocation	NA
chr1	180086206	180086803	598	*	1034	ENSG00000261817	180086275	180093025	-	overlapEnd	6819	69	NearestLocation	NA
chr1	180491277	180491623	347	*	1035	ENSG00000206905	180488152	180488255	-	upstream	-3022	3022	NearestLocation	NA
chr1	180516226	180516526	301	*	1036	ENSG00000266683	180514968	180515067	+	downstream	1258	1159	NearestLocation	NA
chr1	180530166	180530614	449	*	1037	ENSG00000236719	180528112	180535654	+	inside	2054	2054	NearestLocation	OVAAL
chr1	180572411	180572643	233	*	1038	ENSG00000143324	180601140	180859387	+	upstream	-28729	28497	NearestLocation	XPR1
chr1	180609619	180609908	290	*	1039	ENSG00000143324	180601140	180859387	+	inside	8479	8479	NearestLocation	XPR1
chr1	180823682	180823947	266	*	1040	ENSG00000266825	180797031	180797128	-	upstream	-26554	26554	NearestLocation	NA
chr1	180902348	180902777	430	*	1041	ENSG00000135835	180882290	180920750	+	inside	20058	17973	NearestLocation	KIAA1614
chr1	181033373	181033759	387	*	1042	ENSG00000162783	181057638	181059977	+	upstream	-24265	23879	NearestLocation	IER5
chr1	181058899	181059381	483	*	1043	ENSG00000272198	181060245	181062035	+	upstream	-1346	864	NearestLocation	NA
chr1	181064086	181064309	224	*	1044	ENSG00000272198	181060245	181062035	+	downstream	3841	2051	NearestLocation	NA
chr1	181111714	181112036	323	*	1045	ENSG00000237292	181143620	181151344	+	upstream	-31906	31584	NearestLocation	LINC01732
chr1	181120701	181121266	566	*	1046	ENSG00000237292	181143620	181151344	+	upstream	-22919	22354	NearestLocation	LINC01732
chr1	181122101	181122481	381	*	1047	ENSG00000237292	181143620	181151344	+	upstream	-21519	21139	NearestLocation	LINC01732
chr1	181483717	181483984	268	*	1048	ENSG00000198216	181382238	181777219	+	inside	101479	101479	NearestLocation	CACNA1E
chr1	181511033	181511241	209	*	1049	ENSG00000198216	181382238	181777219	+	inside	128795	128795	NearestLocation	CACNA1E
chr1	182023868	182024112	245	*	1050	ENSG00000179930	182023705	182030847	-	inside	6979	163	NearestLocation	ZNF648
chr1	182070656	182070959	304	*	1051	ENSG00000225982	182055686	182059247	+	downstream	14970	11409	NearestLocation	NA
chr1	182199414	182199652	239	*	1052	ENSG00000232096	182151865	182152231	-	upstream	-47183	47183	NearestLocation	NA
chr1	182205296	182205684	389	*	1053	ENSG00000232096	182151865	182152231	-	upstream	-53065	53065	NearestLocation	NA
chr1	182226552	182226751	200	*	1054	ENSG00000228918	182098445	182283196	-	inside	56644	56445	NearestLocation	NA
chr1	182250900	182251180	281	*	1055	ENSG00000228918	182098445	182283196	-	inside	32296	32016	NearestLocation	NA
chr1	182270874	182271080	207	*	1056	ENSG00000228918	182098445	182283196	-	inside	12322	12116	NearestLocation	NA
chr1	182808927	182809293	367	*	1057	ENSG00000135829	182808504	182856886	+	inside	423	423	NearestLocation	DHX9
chr1	183006365	183006582	218	*	1058	ENSG00000135862	182992595	183114727	+	inside	13770	13770	NearestLocation	LAMC1
chr1	183256462	183256847	386	*	1059	ENSG00000233562	183235737	183236420	+	downstream	20725	20042	NearestLocation	RPS3AP8
chr1	183315568	183315767	200	*	1060	ENSG00000157064	183217372	183387737	-	inside	72169	71970	NearestLocation	NMNAT2
chr1	183402709	183403140	432	*	1061	ENSG00000157064	183217372	183387737	-	upstream	-14972	14972	NearestLocation	NMNAT2
chr1	183440966	183441429	464	*	1062	ENSG00000116698	183441351	183567381	+	overlapStart	-385	78	NearestLocation	SMG7
chr1	183548090	183548344	255	*	1063	LRG_88	183524697	183559739	-	inside	11649	11395	NearestLocation	NA
chr1	183603096	183603296	201	*	1064	ENSG00000162704	183592401	183604892	-	inside	1796	1596	NearestLocation	ARPC5
chr1	183609310	183609578	269	*	1065	ENSG00000143344	183605220	183897665	+	inside	4090	4090	NearestLocation	RGL1
chr1	183681253	183681543	291	*	1066	ENSG00000270994	183678440	183679375	-	upstream	-1878	1878	NearestLocation	LOC100420254
chr1	183693765	183693967	203	*	1067	ENSG00000270994	183678440	183679375	-	upstream	-14390	14390	NearestLocation	LOC100420254
chr1	183705579	183705778	200	*	1068	ENSG00000227554	183723553	183724072	-	downstream	18493	17775	NearestLocation	NA
chr1	183781782	183782214	433	*	1069	ENSG00000227554	183723553	183724072	-	upstream	-57710	57710	NearestLocation	NA
chr1	183874229	183874512	284	*	1070	ENSG00000198756	183898796	184006863	-	downstream	132634	24284	NearestLocation	COLGALT2
chr1	183895160	183895396	237	*	1071	ENSG00000198756	183898796	184006863	-	downstream	111703	3400	NearestLocation	COLGALT2
chr1	183956772	183957232	461	*	1072	ENSG00000198756	183898796	184006863	-	inside	50091	49631	NearestLocation	COLGALT2
chr1	183965445	183965947	503	*	1073	ENSG00000198756	183898796	184006863	-	inside	41418	40916	NearestLocation	COLGALT2
chr1	184026074	184026387	314	*	1074	ENSG00000198860	184020811	184043346	+	inside	5263	5263	NearestLocation	TSEN15
chr1	184211613	184211926	314	*	1075	ENSG00000199840	184140848	184140957	-	upstream	-70656	70656	NearestLocation	NA
chr1	184265490	184265915	426	*	1076	ENSG00000207080	184284792	184284899	+	upstream	-19302	18877	NearestLocation	NA
chr1	184319743	184320014	272	*	1077	ENSG00000244568	184304792	184305081	+	downstream	14951	14662	NearestLocation	RN7SL654P
chr1	184724526	184724737	212	*	1078	ENSG00000116406	184659365	184724047	-	upstream	-479	479	NearestLocation	EDEM3
chr1	184951179	184951394	216	*	1079	ENSG00000135842	184759858	184943682	-	upstream	-7497	7497	NearestLocation	NIBAN1
chr1	184987088	184987457	370	*	1080	ENSG00000201312	184984083	184984199	-	upstream	-2889	2889	NearestLocation	RNA5SP72
chr1	185210297	185210626	330	*	1081	ENSG00000201421	185220445	185220543	+	upstream	-10148	9819	NearestLocation	NA
chr1	185253712	185254191	480	*	1082	ENSG00000238061	185249976	185250948	+	downstream	3736	2764	NearestLocation	NA
chr1	185283508	185283720	213	*	1083	ENSG00000116679	185265520	185286461	-	inside	2953	2741	NearestLocation	IVNS1ABP
chr1	185286615	185287036	422	*	1084	ENSG00000273004	185286911	185287662	+	overlapStart	-296	125	NearestLocation	NA
chr1	185571819	185572244	426	*	1085	ENSG00000228309	185527504	185597659	-	inside	25840	25415	NearestLocation	LINC01350
chr1	185623746	185624054	309	*	1086	ENSG00000261729	185624134	185626300	+	upstream	-388	80	NearestLocation	GS1-204I12.4
chr1	185703003	185703202	200	*	1087	ENSG00000143341	185703683	186160085	+	upstream	-680	481	NearestLocation	HMCN1
chr1	185758797	185759182	386	*	1088	ENSG00000143341	185703683	186160085	+	inside	55114	55114	NearestLocation	HMCN1
chr1	186181628	186181966	339	*	1089	ENSG00000224691	186145946	186146434	-	upstream	-35194	35194	NearestLocation	NA
chr1	186317306	186317717	412	*	1090	ENSG00000047410	186280784	186344825	-	inside	27519	27108	NearestLocation	TPR
chr1	186344532	186344817	286	*	1091	ENSG00000047410	186280784	186344825	-	inside	293	8	NearestLocation	TPR
chr1	187205786	187206240	455	*	1092	ENSG00000236030	187061974	187329455	+	inside	143812	123215	NearestLocation	NA
chr1	187235202	187235569	368	*	1093	ENSG00000236030	187061974	187329455	+	inside	173228	93886	NearestLocation	NA
chr1	187366395	187366787	393	*	1094	ENSG00000231599	187412738	187446354	+	upstream	-46343	45951	NearestLocation	NA
chr1	187809742	187810072	331	*	1095	ENSG00000223847	187683374	187683866	-	upstream	-125876	125876	NearestLocation	NA
chr1	188355365	188355678	314	*	1096	ENSG00000225006	188477669	188505596	+	upstream	-122304	121991	NearestLocation	NA
chr1	188457300	188457574	275	*	1097	ENSG00000225006	188477669	188505596	+	upstream	-20369	20095	NearestLocation	NA
chr1	188791564	188791843	280	*	1098	ENSG00000238054	188838608	188856565	-	downstream	65001	46765	NearestLocation	NA
chr1	189744586	189744973	388	*	1099	ENSG00000232212	189744595	189784048	+	overlapStart	-9	9	NearestLocation	LINC01701
chr1	190152753	190153076	324	*	1100	ENSG00000225811	190234028	190331400	+	upstream	-81275	80952	NearestLocation	NA
chr1	190284213	190284710	498	*	1101	ENSG00000225811	190234028	190331400	+	inside	50185	46690	NearestLocation	NA
chr1	190490288	190490487	200	*	1102	ENSG00000241505	190449509	190463427	+	downstream	40779	26861	NearestLocation	NA
chr1	190676662	190676893	232	*	1103	ENSG00000236025	190750917	190751125	+	upstream	-74255	74024	NearestLocation	NA
chr1	190709124	190709324	201	*	1104	ENSG00000236025	190750917	190751125	+	upstream	-41793	41593	NearestLocation	NA
chr1	191858337	191858536	200	*	1105	ENSG00000223344	191827837	191859359	-	inside	1022	823	NearestLocation	NA
chr1	191864906	191865113	208	*	1106	ENSG00000223344	191827837	191859359	-	upstream	-5547	5547	NearestLocation	NA
chr1	192718644	192718843	200	*	1107	ENSG00000231767	192685313	192685783	+	downstream	33331	32861	NearestLocation	RPS27AP5
chr1	192732900	192733139	240	*	1108	ENSG00000228687	192765663	192766335	+	upstream	-32763	32524	NearestLocation	NA
chr1	192848634	192848891	258	*	1109	ENSG00000223075	192844816	192845115	-	upstream	-3519	3519	NearestLocation	RN7SKP126
chr1	193073621	193073843	223	*	1110	ENSG00000023572	193065598	193075244	-	inside	1623	1401	NearestLocation	GLRX2
chr1	193074732	193074931	200	*	1111	ENSG00000023572	193065598	193075244	-	inside	512	313	NearestLocation	GLRX2
chr1	193084722	193084963	242	*	1112	LRG_507	193091088	193223945	+	upstream	-6366	6125	NearestLocation	NA
chr1	193226352	193226646	295	*	1113	ENSG00000232077	193273875	193335083	+	upstream	-47523	47229	NearestLocation	LINC01031
chr1	193378060	193378375	316	*	1114	ENSG00000232077	193273875	193335083	+	downstream	104185	42977	NearestLocation	LINC01031
chr1	193418288	193418530	243	*	1115	ENSG00000232077	193273875	193335083	+	downstream	144413	83205	NearestLocation	LINC01031
chr1	193449974	193450239	266	*	1116	ENSG00000232077	193273875	193335083	+	downstream	176099	114891	NearestLocation	LINC01031
chr1	193538274	193538518	245	*	1117	ENSG00000226640	193648024	193696165	+	upstream	-109750	109506	NearestLocation	NA
chr1	193557537	193557856	320	*	1118	ENSG00000226640	193648024	193696165	+	upstream	-90487	90168	NearestLocation	NA
chr1	194821109	194821350	242	*	1119	ENSG00000228167	194687925	194688366	+	downstream	133184	132743	NearestLocation	NA
chr1	195296659	195296936	278	*	1120	ENSG00000265108	195095811	195095906	+	downstream	200848	200753	NearestLocation	NA
chr1	195863668	195863893	226	*	1121	ENSG00000227421	196014126	196030203	-	downstream	166535	150233	NearestLocation	NA
chr1	196084849	196085084	236	*	1122	ENSG00000227421	196014126	196030203	-	upstream	-54646	54646	NearestLocation	NA
chr1	196385206	196385472	267	*	1123	ENSG00000265986	196551543	196551611	-	downstream	166405	166071	NearestLocation	MIR4735
chr1	196712442	196712657	216	*	1124	ENSG00000116785	196743925	196763203	+	upstream	-31483	31268	NearestLocation	CFHR3
chr1	197149523	197149733	211	*	1125	ENSG00000177888	197122810	197169672	-	inside	20149	19939	NearestLocation	ZBTB41
chr1	197203764	197204023	260	*	1126	ENSG00000237861	197191352	197192385	+	downstream	12412	11379	NearestLocation	NA
chr1	197311320	197311611	292	*	1127	ENSG00000221879	197332947	197333208	+	upstream	-21627	21336	NearestLocation	NA
chr1	197819361	197819620	260	*	1128	ENSG00000203724	197871777	197876497	+	upstream	-52416	52157	NearestLocation	C1orf53
chr1	197937887	197938098	212	*	1129	ENSG00000143355	197881037	197904608	+	downstream	56850	33279	NearestLocation	LHX9
chr1	198057957	198058241	285	*	1130	ENSG00000151414	198126093	198291550	+	upstream	-68136	67852	NearestLocation	NEK7
chr1	198136821	198137128	308	*	1131	ENSG00000151414	198126093	198291550	+	inside	10728	10728	NearestLocation	NEK7
chr1	198234119	198234530	412	*	1132	ENSG00000232824	198166909	198167316	-	upstream	-66803	66803	NearestLocation	NA
chr1	198241672	198241872	201	*	1133	ENSG00000232824	198166909	198167316	-	upstream	-74356	74356	NearestLocation	NA
chr1	198385448	198385751	304	*	1134	ENSG00000151418	198492352	198510075	-	downstream	124627	106601	NearestLocation	ATP6V1G3
chr1	198811886	198812202	317	*	1135	ENSG00000207975	198828002	198828111	-	downstream	16225	15800	NearestLocation	MIR181B1
chr1	199477299	199477530	232	*	1136	ENSG00000263805	199584316	199584408	-	downstream	107109	106786	NearestLocation	NA
chr1	200299996	200300330	335	*	1137	ENSG00000213045	200298289	200298805	+	downstream	1707	1191	NearestLocation	NA
chr1	200710962	200711161	200	*	1138	ENSG00000118200	200708686	200829832	+	inside	2276	2276	NearestLocation	CAMSAP2
chr1	200781032	200781243	212	*	1139	ENSG00000231333	200832936	200833280	+	upstream	-51904	51693	NearestLocation	RPL34P6
chr1	201139497	201139854	358	*	1140	ENSG00000116857	201103900	201140702	-	inside	1205	848	NearestLocation	TMEM9
chr1	201153456	201153697	242	*	1141	ENSG00000163395	201159953	201198080	+	upstream	-6497	6256	NearestLocation	IGFN1
chr1	201237714	201238003	290	*	1142	ENSG00000081277	201252580	201302121	+	upstream	-14866	14577	NearestLocation	PKP1
chr1	201278572	201278909	338	*	1143	ENSG00000081277	201252580	201302121	+	inside	25992	23212	NearestLocation	PKP1
chr1	201297624	201297908	285	*	1144	ENSG00000081277	201252580	201302121	+	inside	45044	4213	NearestLocation	PKP1
chr1	201313003	201313341	339	*	1145	ENSG00000118194	201328136	201346890	-	downstream	33887	14795	NearestLocation	TNNT2
chr1	201320716	201321068	353	*	1146	ENSG00000118194	201328136	201346890	-	downstream	26174	7068	NearestLocation	TNNT2
chr1	201346937	201347280	344	*	1147	ENSG00000118194	201328136	201346890	-	upstream	-47	47	NearestLocation	TNNT2
chr1	201389254	201389669	416	*	1148	ENSG00000227048	201398103	201398489	+	upstream	-8849	8434	NearestLocation	NA
chr1	201430407	201430691	285	*	1149	ENSG00000224818	201433511	201434274	-	downstream	3867	2820	NearestLocation	NA
chr1	201455322	201455698	377	*	1150	ENSG00000174307	201434620	201438365	-	upstream	-16957	16957	NearestLocation	PHLDA3
chr1	201463329	201463712	384	*	1151	ENSG00000224536	201476369	201502736	+	upstream	-13040	12657	NearestLocation	LOC107985246
chr1	201473367	201473566	200	*	1152	ENSG00000224536	201476369	201502736	+	upstream	-3002	2803	NearestLocation	LOC107985246
chr1	201693131	201693470	340	*	1153	ENSG00000264802	201688636	201688755	+	downstream	4495	4376	NearestLocation	MIR5191
chr1	201700701	201701133	433	*	1154	ENSG00000200942	201702534	201702633	+	upstream	-1833	1401	NearestLocation	RNU6-501P
chr1	201762140	201762466	327	*	1155	ENSG00000221028	201777739	201777830	+	upstream	-15599	15273	NearestLocation	MIR1231
chr1	201910583	201910916	334	*	1156	ENSG00000163431	201865580	201915715	-	inside	5132	4799	NearestLocation	LMOD1
chr1	201952552	201952797	246	*	1157	ENSG00000176393	201951500	201975275	+	inside	1052	1052	NearestLocation	RNPEP
chr1	201998930	201999155	226	*	1158	ENSG00000232296	201997734	201997820	+	downstream	1196	1110	NearestLocation	NA
chr1	202045234	202045572	339	*	1159	ENSG00000227109	202065887	202066106	+	upstream	-20653	20315	NearestLocation	CRIP1P3
chr1	202317384	202317583	200	*	1160	ENSG00000077157	202317827	202561834	+	upstream	-443	244	NearestLocation	PPP1R12B
chr1	202376573	202376772	200	*	1161	ENSG00000272262	202379236	202379335	-	downstream	2762	2464	NearestLocation	RNU6-89P
chr1	202427937	202428240	304	*	1162	ENSG00000236439	202440937	202441258	-	downstream	13321	12697	NearestLocation	NA
chr1	202431400	202431919	520	*	1163	ENSG00000236439	202440937	202441258	-	downstream	9858	9018	NearestLocation	NA
chr1	202927636	202927963	328	*	1164	ENSG00000159346	202909951	202927700	-	overlapStart	64	64	NearestLocation	ADIPOR1
chr1	203009026	203009959	934	*	1165	ENSG00000143847	202995626	203047868	+	inside	13400	13400	NearestLocation	PPFIA4
chr1	203109922	203110224	303	*	1166	ENSG00000224671	203113092	203122028	-	downstream	12106	2868	NearestLocation	NA
chr1	203238102	203238475	374	*	1167	ENSG00000133063	203181955	203242769	-	inside	4667	4294	NearestLocation	CHIT1
chr1	203251492	203251691	200	*	1168	ENSG00000231507	203256280	203257929	+	upstream	-4788	4589	NearestLocation	NA
chr1	203269582	203269871	290	*	1169	ENSG00000233791	203267886	203274437	-	inside	4855	1696	NearestLocation	LINC01136
chr1	203333495	203333898	404	*	1170	ENSG00000229652	203322493	203322779	-	upstream	-10716	10716	NearestLocation	NA
chr1	203527395	203527599	205	*	1171	ENSG00000188770	203463271	203477992	+	downstream	64124	49403	NearestLocation	OPTC
chr1	203566558	203566788	231	*	1172	ENSG00000058668	203595689	203713209	+	upstream	-29131	28901	NearestLocation	ATP2B4
chr1	203614006	203614399	394	*	1173	ENSG00000236035	203626097	203626888	-	downstream	12882	11698	NearestLocation	NA
chr1	203695631	203695984	354	*	1174	ENSG00000221643	203698709	203698833	+	upstream	-3078	2725	NearestLocation	SNORA77
chr1	203767284	203767554	271	*	1175	ENSG00000257315	203765437	203769686	+	inside	1847	1847	NearestLocation	ZBED6
chr1	204170325	204170725	401	*	1176	ENSG00000170498	204159469	204165614	-	upstream	-4711	4711	NearestLocation	KISS1
chr1	204258433	204258845	413	*	1177	ENSG00000231691	204246133	204247076	+	downstream	12300	11357	NearestLocation	NA
chr1	204304203	204304428	226	*	1178	ENSG00000219133	204315904	204316386	-	downstream	12183	11476	NearestLocation	RPL21P19
chr1	204435184	204435535	352	*	1179	ENSG00000133056	204391756	204463852	-	inside	28668	28317	NearestLocation	PIK3C2B
chr1	204475935	204476338	404	*	1180	ENSG00000198625	204485511	204542871	+	upstream	-9576	9173	NearestLocation	MDM4
chr1	204485176	204485697	522	*	1181	ENSG00000198625	204485511	204542871	+	overlapStart	-335	186	NearestLocation	MDM4
chr1	204529714	204530016	303	*	1182	ENSG00000200408	204531541	204531649	-	downstream	1935	1525	NearestLocation	RNA5SP74
chr1	204534857	204535113	257	*	1183	ENSG00000200408	204531541	204531649	-	upstream	-3208	3208	NearestLocation	RNA5SP74
chr1	204593966	204594349	384	*	1184	ENSG00000240219	204595903	204598840	+	upstream	-1937	1554	NearestLocation	NA
chr1	204703080	204703408	329	*	1185	ENSG00000251861	204697119	204697234	+	downstream	5961	5846	NearestLocation	NA
chr1	204858865	204859106	242	*	1186	ENSG00000252946	204873875	204873946	-	downstream	15081	14769	NearestLocation	NA
chr1	204884952	204885332	381	*	1187	ENSG00000252946	204873875	204873946	-	upstream	-11006	11006	NearestLocation	NA
chr1	204893397	204893725	329	*	1188	ENSG00000252946	204873875	204873946	-	upstream	-19451	19451	NearestLocation	NA
chr1	204928538	204928814	277	*	1189	ENSG00000229657	204915736	204916297	+	downstream	12802	12241	NearestLocation	RPL13AP11
chr1	205091238	205091437	200	*	1190	ENSG00000117222	205055270	205091143	-	upstream	-95	95	NearestLocation	RBBP5
chr1	205222493	205222693	201	*	1191	ENSG00000225063	205202949	205205995	-	upstream	-16498	16498	NearestLocation	NA
chr1	205225116	205225454	339	*	1192	ENSG00000225063	205202949	205205995	-	upstream	-19121	19121	NearestLocation	NA
chr1	205354723	205354967	245	*	1193	ENSG00000226235	205342380	205356568	+	inside	12343	1601	NearestLocation	LEMD1-AS1
chr1	205647722	205648069	348	*	1194	ENSG00000158715	205626979	205649587	-	inside	1865	1518	NearestLocation	SLC45A3
chr1	206109044	206109275	232	*	1195	ENSG00000196550	206136916	206155151	+	upstream	-27872	27641	NearestLocation	FAM72A
chr1	206110049	206110433	385	*	1196	ENSG00000196550	206136916	206155151	+	upstream	-26867	26483	NearestLocation	FAM72A
chr1	206162967	206163243	277	*	1197	ENSG00000236889	206164084	206166270	+	upstream	-1117	841	NearestLocation	NA
chr1	206173548	206173806	259	*	1198	ENSG00000225483	206180054	206180443	+	upstream	-6506	6248	NearestLocation	RPL22P4
chr1	206257705	206258104	400	*	1199	ENSG00000252692	206261008	206261093	-	downstream	3388	2904	NearestLocation	NA
chr1	206273265	206273608	344	*	1200	ENSG00000252692	206261008	206261093	-	upstream	-12172	12172	NearestLocation	NA
chr1	206274253	206274470	218	*	1201	ENSG00000252692	206261008	206261093	-	upstream	-13160	13160	NearestLocation	NA
chr1	206483931	206484130	200	*	1202	ENSG00000229509	206506678	206506789	-	downstream	22858	22548	NearestLocation	NA
chr1	206499553	206499770	218	*	1203	ENSG00000229509	206506678	206506789	-	downstream	7236	6908	NearestLocation	NA
chr1	206509731	206509951	221	*	1204	ENSG00000229509	206506678	206506789	-	upstream	-2942	2942	NearestLocation	NA
chr1	206510472	206510740	269	*	1205	ENSG00000229509	206506678	206506789	-	upstream	-3683	3683	NearestLocation	NA
chr1	206524811	206525167	357	*	1206	ENSG00000163486	206516200	206637783	+	inside	8611	8611	NearestLocation	NA
chr1	206589781	206590331	551	*	1207	ENSG00000233501	206552219	206554954	-	upstream	-34827	34827	NearestLocation	NA
chr1	206612523	206612894	372	*	1208	ENSG00000143466	206643791	206670223	+	upstream	-31268	30897	NearestLocation	NA
chr1	206674541	206674762	222	*	1209	ENSG00000261000	206677281	206677789	+	upstream	-2740	2519	NearestLocation	NA
chr1	206737338	206737550	213	*	1210	ENSG00000234981	206702248	206703039	+	downstream	35090	34299	NearestLocation	RPL7AP20
chr1	206837384	206837748	365	*	1211	ENSG00000252853	206855308	206855380	+	upstream	-17924	17560	NearestLocation	NA
chr1	206890769	206891031	263	*	1212	ENSG00000224114	206869182	206869614	-	upstream	-21155	21155	NearestLocation	RPS14P1
chr1	206897533	206897757	225	*	1213	ENSG00000199349	206921325	206921437	-	downstream	23904	23568	NearestLocation	NA
chr1	208195229	208195523	295	*	1214	ENSG00000174059	208057594	208084747	-	upstream	-110482	110482	NearestLocation	CD34
chr1	208277416	208277807	392	*	1215	ENSG00000076356	208195587	208417665	-	inside	140249	81829	NearestLocation	PLXNA2
chr1	208291102	208291542	441	*	1216	ENSG00000076356	208195587	208417665	-	inside	126563	95515	NearestLocation	PLXNA2
chr1	208300699	208300931	233	*	1217	ENSG00000076356	208195587	208417665	-	inside	116966	105112	NearestLocation	PLXNA2
chr1	208342480	208342791	312	*	1218	ENSG00000076356	208195587	208417665	-	inside	75185	74874	NearestLocation	PLXNA2
chr1	208418624	208418895	272	*	1219	ENSG00000076356	208195587	208417665	-	upstream	-959	959	NearestLocation	PLXNA2
chr1	208424161	208424598	438	*	1220	ENSG00000226843	208428635	208428721	-	downstream	4560	4037	NearestLocation	NA
chr1	208547985	208548361	377	*	1221	ENSG00000226843	208428635	208428721	-	upstream	-119264	119264	NearestLocation	NA
chr1	208594893	208595219	327	*	1222	ENSG00000226843	208428635	208428721	-	upstream	-166172	166172	NearestLocation	NA
chr1	208604755	208605063	309	*	1223	ENSG00000226843	208428635	208428721	-	upstream	-176034	176034	NearestLocation	NA
chr1	208607400	208607676	277	*	1224	ENSG00000261453	208780445	208785537	-	downstream	178137	172769	NearestLocation	NA
chr1	208766886	208767085	200	*	1225	ENSG00000261453	208780445	208785537	-	downstream	18651	13360	NearestLocation	NA
chr1	208825786	208826074	289	*	1226	ENSG00000259815	208800086	208801430	-	upstream	-24356	24356	NearestLocation	NA
chr1	208976911	208977114	204	*	1227	ENSG00000232812	208902033	208906529	+	downstream	74878	70382	NearestLocation	LINC01717
chr1	209314738	209314940	203	*	1228	ENSG00000232537	209320612	209328446	-	downstream	13708	5672	NearestLocation	NA
chr1	209328872	209329111	240	*	1229	ENSG00000232537	209320612	209328446	-	upstream	-426	426	NearestLocation	NA
chr1	209557419	209557843	425	*	1230	ENSG00000231648	209541007	209553035	+	downstream	16412	4384	NearestLocation	NA
chr1	209747764	209748063	300	*	1231	ENSG00000224260	209701800	209741018	-	upstream	-6746	6746	NearestLocation	NA
chr1	209816283	209816525	243	*	1232	ENSG00000196878	209788215	209825811	-	inside	9528	9286	NearestLocation	LAMB3
chr1	210175217	210175434	218	*	1233	ENSG00000143469	210111538	210337636	+	inside	63679	63679	NearestLocation	SYT14
chr1	210395717	210396084	368	*	1234	ENSG00000082497	210406144	210419976	+	upstream	-10427	10060	NearestLocation	SERTAD4
chr1	210704933	210705338	406	*	1235	ENSG00000270936	210635689	210636356	-	upstream	-68577	68577	NearestLocation	BPNT2P
chr1	210755942	210756243	302	*	1236	ENSG00000270936	210635689	210636356	-	upstream	-119586	119586	NearestLocation	BPNT2P
chr1	211278294	211278557	264	*	1237	ENSG00000234233	211305930	211306716	-	downstream	28422	27373	NearestLocation	NA
chr1	211308728	211309007	280	*	1238	ENSG00000143473	210856555	211307457	-	upstream	-1271	1271	NearestLocation	KCNH1
chr1	211665860	211666151	292	*	1239	ENSG00000198570	211649864	211666259	-	inside	399	108	NearestLocation	RD3
chr1	211722166	211722423	258	*	1240	ENSG00000170385	211744910	211752084	-	downstream	29918	22487	NearestLocation	SLC30A1
chr1	211927059	211927446	388	*	1241	ENSG00000226868	211889270	211898744	-	upstream	-28315	28315	NearestLocation	NA
chr1	212107054	212107257	204	*	1242	ENSG00000233626	212109591	212109976	+	upstream	-2537	2334	NearestLocation	NA
chr1	212209105	212209327	223	*	1243	ENSG00000143476	212208919	212280742	+	inside	186	186	NearestLocation	DTL
chr1	212393018	212393746	729	*	1244	ENSG00000226251	212398620	212412319	-	downstream	19301	4874	NearestLocation	LINC02608
chr1	212541289	212541522	234	*	1245	ENSG00000229832	212530760	212531695	+	downstream	10529	9594	NearestLocation	NA
chr1	212801405	212801746	342	*	1246	ENSG00000235862	212797626	212800113	-	upstream	-1292	1292	NearestLocation	NA
chr1	212812164	212812572	409	*	1247	ENSG00000226036	212820638	212821097	+	upstream	-8474	8066	NearestLocation	NA
chr1	212874589	212874793	205	*	1248	ENSG00000123685	212859760	212873327	-	upstream	-1262	1262	NearestLocation	BATF3
chr1	212965153	212965445	293	*	1249	ENSG00000203705	212965170	212989968	+	overlapStart	-17	17	NearestLocation	TATDN3
chr1	213031039	213031239	201	*	1250	ENSG00000198468	213025450	213031430	-	inside	391	191	NearestLocation	FLVCR1-DT
chr1	213144845	213145076	232	*	1251	ENSG00000143494	213123862	213165379	+	inside	20983	20303	NearestLocation	VASH2
chr1	213218794	213218993	200	*	1252	ENSG00000136643	213224589	213448116	+	upstream	-5795	5596	NearestLocation	RPS6KC1
chr1	213224354	213224725	372	*	1253	ENSG00000136643	213224589	213448116	+	overlapStart	-235	136	NearestLocation	RPS6KC1
chr1	213550159	213550532	374	*	1254	ENSG00000228646	213602051	213602420	-	downstream	52261	51519	NearestLocation	RPL31P13
chr1	213573003	213573416	414	*	1255	ENSG00000228646	213602051	213602420	-	downstream	29417	28635	NearestLocation	RPL31P13
chr1	213704086	213704382	297	*	1256	ENSG00000225233	213665644	213719790	+	inside	38442	15408	NearestLocation	NA
chr1	214187257	214187626	370	*	1257	ENSG00000272167	214202236	214204109	-	downstream	16852	14610	NearestLocation	NA
chr1	214204883	214205173	291	*	1258	ENSG00000272167	214202236	214204109	-	upstream	-774	774	NearestLocation	NA
chr1	214280742	214281031	290	*	1259	ENSG00000272167	214202236	214204109	-	upstream	-76633	76633	NearestLocation	NA
chr1	214407492	214407799	308	*	1260	ENSG00000143499	214454445	214510474	+	upstream	-46953	46646	NearestLocation	SMYD2
chr1	214450979	214451530	552	*	1261	ENSG00000143499	214454445	214510474	+	upstream	-3466	2915	NearestLocation	SMYD2
chr1	214501038	214501238	201	*	1262	ENSG00000228470	214517515	214530958	-	downstream	29920	16277	NearestLocation	NA
chr1	214593023	214593333	311	*	1263	ENSG00000228470	214517515	214530958	-	upstream	-62065	62065	NearestLocation	NA
chr1	214650782	214651048	267	*	1264	ENSG00000213036	214656156	214656730	-	downstream	5948	5108	NearestLocation	NA
chr1	215449943	215450160	218	*	1265	ENSG00000232809	215549827	215550717	+	upstream	-99884	99667	NearestLocation	NA
chr1	216145190	216145506	317	*	1266	ENSG00000229242	216059924	216074806	+	downstream	85266	70384	NearestLocation	NA
chr1	216397196	216397395	200	*	1267	ENSG00000226013	216374977	216375168	-	upstream	-22028	22028	NearestLocation	NA
chr1	216598992	216599273	282	*	1268	ENSG00000042781	215796236	216596738	-	upstream	-2254	2254	NearestLocation	USH2A
chr1	216635881	216636080	200	*	1269	ENSG00000042781	215796236	216596738	-	upstream	-39143	39143	NearestLocation	USH2A
chr1	216923500	216923716	217	*	1270	ENSG00000042781	215796236	216596738	-	upstream	-326762	326762	NearestLocation	USH2A
chr1	216953095	216953334	240	*	1271	ENSG00000042781	215796236	216596738	-	upstream	-356357	356357	NearestLocation	USH2A
chr1	217062012	217062669	658	*	1272	ENSG00000196482	216676588	217311097	-	inside	249085	248428	NearestLocation	ESRRG
chr1	217313893	217314205	313	*	1273	ENSG00000196482	216676588	217311097	-	upstream	-2796	2796	NearestLocation	ESRRG
chr1	217528222	217528421	200	*	1274	ENSG00000229841	217665317	217667625	+	upstream	-137095	136896	NearestLocation	NA
chr1	217627197	217627580	384	*	1275	ENSG00000229841	217665317	217667625	+	upstream	-38120	37737	NearestLocation	NA
chr1	217833931	217834247	317	*	1276	ENSG00000162814	217804666	218045038	+	inside	29265	29265	NearestLocation	SPATA17
chr1	218069243	218069469	227	*	1277	ENSG00000231814	218066242	218094146	+	inside	3001	3001	NearestLocation	LINC00210
chr1	218478007	218478289	283	*	1278	ENSG00000229016	218474604	218475314	-	upstream	-2693	2693	NearestLocation	NA
chr1	218632527	218632751	225	*	1279	ENSG00000228208	218683438	218699320	+	upstream	-50911	50687	NearestLocation	LINC02869
chr1	218689897	218690124	228	*	1280	ENSG00000228208	218683438	218699320	+	inside	6459	6459	NearestLocation	LINC02869
chr1	218847796	218848199	404	*	1281	ENSG00000212610	218715033	218715241	-	upstream	-132555	132555	NearestLocation	NA
chr1	218866204	218866635	432	*	1282	ENSG00000212610	218715033	218715241	-	upstream	-150963	150963	NearestLocation	NA
chr1	218908874	218909304	431	*	1283	ENSG00000226693	219054942	219055992	-	downstream	147118	145638	NearestLocation	NA
chr1	218948774	218949489	716	*	1284	ENSG00000226693	219054942	219055992	-	downstream	107218	105453	NearestLocation	NA
chr1	218982998	218983449	452	*	1285	ENSG00000226693	219054942	219055992	-	downstream	72994	71493	NearestLocation	NA
chr1	219361005	219361204	200	*	1286	ENSG00000225920	219373256	219373909	-	downstream	12904	12052	NearestLocation	NA
chr1	219586891	219587119	229	*	1287	ENSG00000228536	219583023	219585283	-	upstream	-1608	1608	NearestLocation	NA
chr1	219710519	219710744	226	*	1288	ENSG00000238232	219730534	219731043	+	upstream	-20015	19790	NearestLocation	NA
chr1	219921701	219922051	351	*	1289	ENSG00000252086	219935131	219935217	+	upstream	-13430	13080	NearestLocation	RNA5SP76
chr1	219931295	219931581	287	*	1290	ENSG00000252086	219935131	219935217	+	upstream	-3836	3550	NearestLocation	RNA5SP76
chr1	219954530	219954808	279	*	1291	ENSG00000252086	219935131	219935217	+	downstream	19399	19313	NearestLocation	RNA5SP76
chr1	220138600	220138968	369	*	1292	ENSG00000221673	220136028	220136206	+	downstream	2572	2394	NearestLocation	NA
chr1	220207548	220207755	208	*	1293	ENSG00000136628	220141943	220220000	-	inside	12452	12245	NearestLocation	EPRS1
chr1	220297908	220298127	220	*	1294	ENSG00000207624	220291499	220291583	-	upstream	-6325	6325	NearestLocation	MIR194-1
chr1	220625019	220625236	218	*	1295	ENSG00000235163	220621858	220622195	+	downstream	3161	2824	NearestLocation	NA
chr1	220828305	220828529	225	*	1296	ENSG00000225782	220835813	220836458	-	downstream	8153	7284	NearestLocation	NA
chr1	220847361	220847560	200	*	1297	ENSG00000225782	220835813	220836458	-	upstream	-10903	10903	NearestLocation	NA
chr1	221139957	221140542	586	*	1298	ENSG00000257551	221006105	221053482	-	upstream	-86475	86475	NearestLocation	HLX-AS1
chr1	221188761	221189028	268	*	1299	ENSG00000226211	221307207	221307563	-	downstream	118802	118179	NearestLocation	NA
chr1	221684479	221684784	306	*	1300	ENSG00000232436	221681901	221684321	+	downstream	2578	158	NearestLocation	NA
chr1	221685117	221685466	350	*	1301	ENSG00000232436	221681901	221684321	+	downstream	3216	796	NearestLocation	NA
chr1	221729104	221729341	238	*	1302	ENSG00000227585	221723128	221723985	-	upstream	-5119	5119	NearestLocation	NA
chr1	221861114	221861470	357	*	1303	ENSG00000143507	221874766	221915518	-	downstream	54404	13296	NearestLocation	DUSP10
chr1	222204625	222204927	303	*	1304	ENSG00000212094	222186349	222186432	-	upstream	-18193	18193	NearestLocation	NA
chr1	222211159	222211429	271	*	1305	ENSG00000212094	222186349	222186432	-	upstream	-24727	24727	NearestLocation	NA
chr1	222614466	222614673	208	*	1306	ENSG00000226643	222626082	222628047	-	downstream	13581	11409	NearestLocation	NA
chr1	222807779	222808078	300	*	1307	ENSG00000229399	222814756	222815200	-	downstream	7421	6678	NearestLocation	NA
chr1	223327270	223327469	200	*	1308	ENSG00000236846	223317391	223318296	+	downstream	9879	8974	NearestLocation	NA
chr1	223442424	223442634	211	*	1309	ENSG00000226601	223354486	223361496	+	downstream	87938	80928	NearestLocation	NA
chr1	223538591	223538802	212	*	1310	ENSG00000143502	223394161	223537544	-	upstream	-1047	1047	NearestLocation	SUSD4
chr1	223893300	223893579	280	*	1311	ENSG00000162909	223889295	223963720	+	inside	4005	4005	NearestLocation	CAPN2
chr1	223976750	223976987	238	*	1312	ENSG00000143514	223967601	224033674	-	inside	56924	9149	NearestLocation	TP53BP2
chr1	224058403	224058767	365	*	1313	ENSG00000188460	224051428	224052553	-	upstream	-5850	5850	NearestLocation	NA
chr1	224401273	224401590	318	*	1314	ENSG00000232628	224396449	224400981	-	upstream	-292	292	NearestLocation	LOC101927143
chr1	224691223	224691481	259	*	1315	ENSG00000162923	224572845	224624735	-	upstream	-66488	66488	NearestLocation	WDR26
chr1	224921001	224921291	291	*	1316	ENSG00000229400	224905206	224918364	-	upstream	-2637	2637	NearestLocation	NA
chr1	225414762	225415003	242	*	1317	ENSG00000203691	225600404	225602040	+	upstream	-185642	185401	NearestLocation	NA
chr1	225566706	225566973	268	*	1318	ENSG00000203691	225600404	225602040	+	upstream	-33698	33431	NearestLocation	NA
chr1	225737531	225737958	428	*	1319	ENSG00000234476	225634945	225653045	-	upstream	-84486	84486	NearestLocation	NA
chr1	225815027	225815427	401	*	1320	ENSG00000154380	225674537	225840844	-	inside	25817	25417	NearestLocation	ENAH
chr1	225845304	225845503	200	*	1321	ENSG00000154380	225674537	225840844	-	upstream	-4460	4460	NearestLocation	ENAH
chr1	225881849	225882228	380	*	1322	ENSG00000227496	225888306	225939945	+	upstream	-6457	6078	NearestLocation	NA
chr1	225942650	225943118	469	*	1323	ENSG00000223306	225928977	225929084	+	downstream	13673	13566	NearestLocation	RNU6-1304P
chr1	225965155	225965493	339	*	1324	ENSG00000143742	225965531	225978168	+	upstream	-376	38	NearestLocation	SRP9
chr1	226036248	226036474	227	*	1325	ENSG00000242861	226028584	226034223	-	upstream	-2025	2025	NearestLocation	NA
chr1	226187106	226187594	489	*	1326	ENSG00000143751	226170403	226187032	-	upstream	-74	74	NearestLocation	SDE2
chr1	226316286	226316717	432	*	1327	ENSG00000270598	226314879	226315047	+	downstream	1407	1239	NearestLocation	NA
chr1	226460340	226460620	281	*	1328	ENSG00000238545	226491963	226492064	+	upstream	-31623	31343	NearestLocation	NA
chr1	226494810	226495119	310	*	1329	ENSG00000183814	226418850	226497570	-	inside	2760	2451	NearestLocation	LIN9
chr1	226543992	226544272	281	*	1330	ENSG00000236994	226505716	226506394	-	upstream	-37598	37598	NearestLocation	YBX1P9
chr1	226552242	226552622	381	*	1331	ENSG00000143799	226548392	226595780	-	inside	43538	3850	NearestLocation	PARP1
chr1	226662311	226662691	381	*	1332	ENSG00000177770	226680889	226681190	-	downstream	18879	18198	NearestLocation	NA
chr1	226669892	226670216	325	*	1333	ENSG00000177770	226680889	226681190	-	downstream	11298	10673	NearestLocation	NA
chr1	226720320	226720612	293	*	1334	ENSG00000203685	226736501	226796915	+	upstream	-16181	15889	NearestLocation	STUM
chr1	226798093	226798292	200	*	1335	ENSG00000228548	226856598	226864046	+	upstream	-58505	58306	NearestLocation	NA
chr1	227173513	227173717	205	*	1336	ENSG00000233706	227179841	227180907	+	upstream	-6328	6124	NearestLocation	NA
chr1	227751615	227751814	200	*	1337	ENSG00000181450	227751244	227865144	+	inside	371	371	NearestLocation	ZNF678
chr1	228105002	228105284	283	*	1338	ENSG00000264483	228129291	228129384	-	downstream	24382	24007	NearestLocation	MIR5008
chr1	228272960	228273510	551	*	1339	ENSG00000143761	228270361	228286912	+	inside	2599	2599	NearestLocation	ARF1
chr1	228556765	228557184	420	*	1340	ENSG00000270104	228571815	228572717	-	downstream	15952	14631	NearestLocation	NA
chr1	228674702	228675030	329	*	1341	ENSG00000168159	228674762	228683467	+	overlapStart	-60	60	NearestLocation	RNF187
chr1	228702269	228702502	234	*	1342	ENSG00000215811	228696356	228700006	-	upstream	-2263	2263	NearestLocation	BTNL10
chr1	228744741	228744995	255	*	1343	ENSG00000183929	228744885	228788150	+	overlapStart	-144	110	NearestLocation	NA
chr1	228758039	228758323	285	*	1344	ENSG00000200624	228757194	228757312	-	upstream	-727	727	NearestLocation	RNA5S6
chr1	228916930	228917402	473	*	1345	ENSG00000271475	228912059	228912612	+	downstream	4871	4318	NearestLocation	LOC100421842
chr1	229034522	229034731	210	*	1346	ENSG00000271399	228993757	228994303	+	downstream	40765	40219	NearestLocation	NA
chr1	229036110	229036309	200	*	1347	ENSG00000271399	228993757	228994303	+	downstream	42353	41807	NearestLocation	NA
chr1	229054194	229054456	263	*	1348	ENSG00000271399	228993757	228994303	+	downstream	60437	59891	NearestLocation	NA
chr1	229283891	229284248	358	*	1349	ENSG00000236975	229228562	229230652	-	upstream	-53239	53239	NearestLocation	NA
chr1	229690739	229691127	389	*	1350	ENSG00000135776	229652329	229694442	-	inside	3703	3315	NearestLocation	ABCB10
chr1	229698946	229699296	351	*	1351	ENSG00000135776	229652329	229694442	-	upstream	-4504	4504	NearestLocation	ABCB10
chr1	229738221	229738603	383	*	1352	ENSG00000135801	229728858	229761794	-	inside	23573	9363	NearestLocation	TAF5L
chr1	230106564	230106836	273	*	1353	ENSG00000228058	230138477	230142909	+	upstream	-31913	31641	NearestLocation	LINC01736
chr1	230216526	230216751	226	*	1354	ENSG00000143641	230193536	230417870	+	inside	22990	22990	NearestLocation	GALNT2
chr1	230341574	230341773	200	*	1355	ENSG00000227006	230394440	230404229	-	downstream	62655	52667	NearestLocation	NA
chr1	230399150	230399701	552	*	1356	ENSG00000227006	230394440	230404229	-	inside	5079	4528	NearestLocation	NA
chr1	230453966	230454165	200	*	1357	ENSG00000203257	230451438	230451976	-	upstream	-1990	1990	NearestLocation	NA
chr1	230896107	230896348	242	*	1358	ENSG00000135773	230883130	230937749	+	inside	12977	12977	NearestLocation	CAPN9
chr1	230987157	230987520	364	*	1359	ENSG00000119280	230972865	231005335	-	inside	18178	14292	NearestLocation	C1orf198
chr1	231035660	231036031	372	*	1360	ENSG00000238985	231031178	231031250	-	upstream	-4410	4410	NearestLocation	NA
chr1	231173831	231174074	244	*	1361	ENSG00000182118	231154704	231175992	-	inside	2161	1918	NearestLocation	FAM89A
chr1	231529452	231529787	336	*	1362	ENSG00000135766	231499497	231560790	-	inside	31338	29955	NearestLocation	EGLN1
chr1	231726280	231726479	200	*	1363	ENSG00000229228	231727038	231747836	-	downstream	21556	559	NearestLocation	LINC00582
chr1	231928480	231928758	279	*	1364	ENSG00000222986	231806381	231806496	+	downstream	122099	121984	NearestLocation	RNU5A-5P
chr1	231953897	231954360	464	*	1365	ENSG00000226758	232061580	232080979	+	upstream	-107683	107220	NearestLocation	DISC1-IT1
chr1	231957094	231957343	250	*	1366	ENSG00000226758	232061580	232080979	+	upstream	-104486	104237	NearestLocation	DISC1-IT1
chr1	231972329	231972635	307	*	1367	ENSG00000226758	232061580	232080979	+	upstream	-89251	88945	NearestLocation	DISC1-IT1
chr1	231983400	231983823	424	*	1368	ENSG00000226758	232061580	232080979	+	upstream	-78180	77757	NearestLocation	DISC1-IT1
chr1	231986625	231986824	200	*	1369	ENSG00000226758	232061580	232080979	+	upstream	-74955	74756	NearestLocation	DISC1-IT1
chr1	232094136	232094413	278	*	1370	ENSG00000226758	232061580	232080979	+	downstream	32556	13157	NearestLocation	DISC1-IT1
chr1	232165184	232165384	201	*	1371	ENSG00000226758	232061580	232080979	+	downstream	103604	84205	NearestLocation	DISC1-IT1
chr1	232454792	232455176	385	*	1372	ENSG00000242794	232358612	232358891	+	downstream	96180	95901	NearestLocation	RN7SL299P
chr1	232464303	232464786	484	*	1373	ENSG00000242794	232358612	232358891	+	downstream	105691	105412	NearestLocation	RN7SL299P
chr1	232691639	232692434	796	*	1374	ENSG00000116991	232533711	232697304	-	inside	5665	4870	NearestLocation	SIPA1L2
chr1	232725514	232725977	464	*	1375	ENSG00000116991	232533711	232697304	-	upstream	-28210	28210	NearestLocation	SIPA1L2
chr1	232729859	232730065	207	*	1376	ENSG00000116991	232533711	232697304	-	upstream	-32555	32555	NearestLocation	SIPA1L2
chr1	232756075	232756459	385	*	1377	ENSG00000116991	232533711	232697304	-	upstream	-58771	58771	NearestLocation	SIPA1L2
chr1	232784105	232784366	262	*	1378	ENSG00000238382	232835950	232836054	+	upstream	-51845	51584	NearestLocation	RNU6-1211P
chr1	233262833	233263082	250	*	1379	ENSG00000231940	233424614	233425193	-	downstream	162360	161532	NearestLocation	RPS7P3
chr1	233369431	233369645	215	*	1380	ENSG00000231940	233424614	233425193	-	downstream	55762	54969	NearestLocation	RPS7P3
chr1	233926850	233927171	322	*	1381	ENSG00000225486	233971826	233972178	-	downstream	45328	44655	NearestLocation	NA
chr1	234508896	234509748	853	*	1382	ENSG00000168275	234509202	234519795	+	overlapStart	-306	306	NearestLocation	COA6
chr1	234679244	234679445	202	*	1383	ENSG00000231768	234663637	234667525	-	upstream	-11719	11719	NearestLocation	LINC01354
chr1	234689244	234689608	365	*	1384	ENSG00000230404	234701044	234705834	+	upstream	-11800	11436	NearestLocation	NA
chr1	234709647	234709928	282	*	1385	ENSG00000230404	234701044	234705834	+	downstream	8603	3813	NearestLocation	NA
chr1	234866366	234866732	367	*	1386	ENSG00000227630	234859789	234867390	+	inside	6577	658	NearestLocation	LINC01132
chr1	235110796	235111245	450	*	1387	ENSG00000238005	235093089	235105809	-	upstream	-4987	4987	NearestLocation	LOC101927851
chr1	235247144	235247370	227	*	1388	ENSG00000233018	235260502	235260727	-	downstream	13583	13132	NearestLocation	NA
chr1	236102564	236102792	229	*	1389	ENSG00000237845	236105853	236107105	-	downstream	4541	3061	NearestLocation	NA
chr1	236670748	236670971	224	*	1390	ENSG00000116977	236681300	236716281	+	upstream	-10552	10329	NearestLocation	LGALS8
chr1	236852115	236852397	283	*	1391	ENSG00000077522	236849754	236927931	+	inside	2361	2361	NearestLocation	ACTN2
chr1	236853095	236853379	285	*	1392	ENSG00000077522	236849754	236927931	+	inside	3341	3341	NearestLocation	ACTN2
chr1	236862604	236863011	408	*	1393	ENSG00000077522	236849754	236927931	+	inside	12850	12850	NearestLocation	ACTN2
chr1	236869074	236869337	264	*	1394	ENSG00000077522	236849754	236927931	+	inside	19320	19320	NearestLocation	ACTN2
chr1	236876925	236877146	222	*	1395	ENSG00000077522	236849754	236927931	+	inside	27171	27171	NearestLocation	ACTN2
chr1	236877793	236878353	561	*	1396	ENSG00000077522	236849754	236927931	+	inside	28039	28039	NearestLocation	ACTN2
chr1	236917305	236917664	360	*	1397	ENSG00000116984	236958610	237067281	+	upstream	-41305	40946	NearestLocation	MTR
chr1	237053967	237054301	335	*	1398	ENSG00000226498	236982934	236983818	+	downstream	71033	70149	NearestLocation	RPSAP21
chr1	237070594	237070886	293	*	1399	ENSG00000237991	237144637	237145008	+	upstream	-74043	73751	NearestLocation	RPL35P1
chr1	237076965	237077192	228	*	1400	ENSG00000237991	237144637	237145008	+	upstream	-67672	67445	NearestLocation	RPL35P1
chr1	237145768	237146015	248	*	1401	ENSG00000237991	237144637	237145008	+	downstream	1131	760	NearestLocation	RPL35P1
chr1	237160719	237161164	446	*	1402	ENSG00000244020	237167403	237167718	-	downstream	6999	6239	NearestLocation	MT1HL1
chr1	237207577	237207889	313	*	1403	ENSG00000198626	237205505	237997288	+	inside	2072	2072	NearestLocation	RYR2
chr1	237309595	237309917	323	*	1404	ENSG00000252396	237284107	237284409	+	downstream	25488	25186	NearestLocation	RN7SKP195
chr1	237413431	237413798	368	*	1405	ENSG00000252396	237284107	237284409	+	downstream	129324	129022	NearestLocation	RN7SKP195
chr1	237547558	237547949	392	*	1406	ENSG00000266262	237634419	237634491	+	upstream	-86861	86470	NearestLocation	MIR4428
chr1	237858662	237858908	247	*	1407	ENSG00000252290	237718340	237718471	-	upstream	-140191	140191	NearestLocation	NA
chr1	238822037	238822432	396	*	1408	ENSG00000224783	238940349	238942500	-	downstream	120463	117917	NearestLocation	NA
chr1	238835594	238835918	325	*	1409	ENSG00000224783	238940349	238942500	-	downstream	106906	104431	NearestLocation	NA
chr1	238837920	238838256	337	*	1410	ENSG00000224783	238940349	238942500	-	downstream	104580	102093	NearestLocation	NA
chr1	240159610	240159922	313	*	1411	ENSG00000217327	240175946	240176526	+	upstream	-16336	16024	NearestLocation	NA
chr1	240333957	240334409	453	*	1412	ENSG00000223694	240333455	240334591	+	inside	502	182	NearestLocation	ADH5P3
chr1	240363257	240363921	665	*	1413	ENSG00000233735	240341139	240342944	-	upstream	-20313	20313	NearestLocation	NA
chr1	240400590	240400941	352	*	1414	ENSG00000233735	240341139	240342944	-	upstream	-57646	57646	NearestLocation	NA
chr1	241280674	241281194	521	*	1415	ENSG00000265831	241295572	241295646	+	upstream	-14898	14378	NearestLocation	MIR3123
chr1	241471757	241471956	200	*	1416	ENSG00000224348	241468880	241469182	-	upstream	-2575	2575	NearestLocation	RPL36P6
chr1	241773484	241773699	216	*	1417	ENSG00000203668	241792155	241799232	-	downstream	25748	18456	NearestLocation	CHML;OPN3
chr1	242196629	242197037	409	*	1418	ENSG00000223119	242187251	242187356	-	upstream	-9273	9273	NearestLocation	NA
chr1	243040589	243041108	520	*	1419	ENSG00000270818	243045368	243046777	-	downstream	6188	4260	NearestLocation	LOC100129949
chr1	243368406	243368700	295	*	1420	ENSG00000269795	243388058	243395911	+	upstream	-19652	19358	NearestLocation	NA
chr1	243684098	243684386	289	*	1421	ENSG00000236031	243708834	243711631	+	upstream	-24736	24448	NearestLocation	NA
chr1	244282059	244282337	279	*	1422	ENSG00000237759	244270667	244272313	+	downstream	11392	9746	NearestLocation	NA
chr1	244466387	244466697	311	*	1423	ENSG00000173728	244515937	244552965	+	upstream	-49550	49240	NearestLocation	C1orf100
chr1	244533553	244533906	354	*	1424	ENSG00000173728	244515937	244552965	+	inside	17616	17616	NearestLocation	C1orf100
chr1	244952950	244953219	270	*	1425	ENSG00000203667	244998624	245008359	+	upstream	-45674	45405	NearestLocation	COX20
chr1	244984426	244984730	305	*	1426	ENSG00000203667	244998624	245008359	+	upstream	-14198	13894	NearestLocation	COX20
chr1	245206143	245206439	297	*	1427	ENSG00000251754	245207230	245207334	+	upstream	-1087	791	NearestLocation	RNU6-999P
chr1	245214837	245215361	525	*	1428	ENSG00000251754	245207230	245207334	+	downstream	7607	7503	NearestLocation	RNU6-999P
chr1	245454164	245454529	366	*	1429	ENSG00000232793	245446133	245446391	-	upstream	-7773	7773	NearestLocation	NA
chr1	245491146	245491483	338	*	1430	ENSG00000221165	245533636	245533721	+	upstream	-42490	42153	NearestLocation	NA
chr1	245501076	245501417	342	*	1431	ENSG00000221165	245533636	245533721	+	upstream	-32560	32219	NearestLocation	NA
chr1	245585694	245586051	358	*	1432	ENSG00000221165	245533636	245533721	+	downstream	52058	51973	NearestLocation	NA
chr1	245762323	245762601	279	*	1433	ENSG00000238224	245778075	245778447	-	downstream	16124	15474	NearestLocation	NA
chr1	245809271	245809614	344	*	1434	ENSG00000231612	245837034	245839780	-	downstream	30509	27420	NearestLocation	NA
chr1	245817860	245818398	539	*	1435	ENSG00000231612	245837034	245839780	-	downstream	21920	18636	NearestLocation	NA
chr1	245938645	245938850	206	*	1436	ENSG00000231612	245837034	245839780	-	upstream	-98865	98865	NearestLocation	NA
chr1	245954637	245955397	761	*	1437	ENSG00000231612	245837034	245839780	-	upstream	-114857	114857	NearestLocation	NA
chr1	246166523	246166745	223	*	1438	ENSG00000235096	246196853	246198905	+	upstream	-30330	30108	NearestLocation	NA
chr1	246195490	246195736	247	*	1439	ENSG00000235096	246196853	246198905	+	upstream	-1363	1117	NearestLocation	NA
chr1	246339652	246339870	219	*	1440	ENSG00000225222	246342080	246342506	+	upstream	-2428	2210	NearestLocation	CHCHD4P5
chr1	246608142	246608377	236	*	1441	ENSG00000207326	246589308	246589421	-	upstream	-18721	18721	NearestLocation	NA
chr1	246660653	246660990	338	*	1442	ENSG00000185420	245912642	246670614	-	inside	9961	9624	NearestLocation	SMYD3
chr1	247073044	247073294	251	*	1443	ENSG00000153207	247002400	247095280	-	inside	22236	21986	NearestLocation	AHCTF1
chr1	247267646	247267915	270	*	1444	ENSG00000188295	247263264	247267674	-	overlapStart	28	28	NearestLocation	ZNF669
chr1	247333945	247334266	322	*	1445	ENSG00000196418	247285277	247335318	-	inside	1373	1052	NearestLocation	ZNF124
chr1	247456352	247456620	269	*	1446	ENSG00000202079	247458137	247458243	+	upstream	-1785	1517	NearestLocation	NA
chr1	248333775	248333985	211	*	1447	ENSG00000198601	248343288	248344331	+	upstream	-9513	9303	NearestLocation	OR2M2
chr1	249120232	249120446	215	*	1448	ENSG00000264500	249120576	249120642	+	upstream	-344	130	NearestLocation	MIR3124
chr1	249167334	249167726	393	*	1449	ENSG00000227237	249153363	249158995	+	downstream	13971	8339	NearestLocation	NA
chr10	348769	349112	344	*	1450	ENSG00000201861	327955	328065	-	upstream	-20704	20704	NearestLocation	RNA5SP298
chr10	419518	419795	278	*	1451	ENSG00000239822	476181	476444	-	downstream	56926	56386	NearestLocation	RN7SL754P
chr10	700092	700291	200	*	1452	ENSG00000180525	695888	711109	+	inside	4204	4204	NearestLocation	DIP2C-AS1
chr10	1195843	1196192	350	*	1453	ENSG00000229205	1205708	1210612	+	upstream	-9865	9516	NearestLocation	LINC00200
chr10	1268605	1268804	200	*	1454	ENSG00000229205	1205708	1210612	+	downstream	62897	57993	NearestLocation	LINC00200
chr10	1314383	1314608	226	*	1455	ENSG00000233052	1403196	1403832	-	downstream	89449	88588	NearestLocation	NA
chr10	1507116	1507320	205	*	1456	ENSG00000205696	1568832	1599179	+	upstream	-61716	61512	NearestLocation	ADARB2-AS1
chr10	1601389	1601780	392	*	1457	ENSG00000205696	1568832	1599179	+	downstream	32557	2210	NearestLocation	ADARB2-AS1
chr10	2614741	2615008	268	*	1458	ENSG00000235281	2543975	2609431	+	downstream	70766	5310	NearestLocation	NA
chr10	2653284	2653483	200	*	1459	ENSG00000235281	2543975	2609431	+	downstream	109309	43853	NearestLocation	NA
chr10	2675795	2676218	424	*	1460	ENSG00000235281	2543975	2609431	+	downstream	131820	66364	NearestLocation	NA
chr10	2776944	2777270	327	*	1461	ENSG00000231743	2978213	2978633	+	upstream	-201269	200943	NearestLocation	NA
chr10	2962985	2963204	220	*	1462	ENSG00000231743	2978213	2978633	+	upstream	-15228	15009	NearestLocation	NA
chr10	3053327	3053526	200	*	1463	ENSG00000234182	3052723	3055303	+	inside	604	604	NearestLocation	NA
chr10	3088182	3088493	312	*	1464	ENSG00000273001	3107616	3108193	-	downstream	20011	19123	NearestLocation	NA
chr10	3103817	3104069	253	*	1465	ENSG00000273001	3107616	3108193	-	downstream	4376	3547	NearestLocation	NA
chr10	3136992	3137261	270	*	1466	ENSG00000067057	3108525	3179904	+	inside	28467	28467	NearestLocation	PFKP
chr10	3239939	3240192	254	*	1467	ENSG00000107959	3179920	3215003	-	upstream	-24936	24936	NearestLocation	PITRM1
chr10	3542607	3542929	323	*	1468	ENSG00000233321	3529086	3545030	-	inside	2423	2101	NearestLocation	LINC02669
chr10	3616617	3617045	429	*	1469	ENSG00000236892	3574286	3579223	-	upstream	-37394	37394	NearestLocation	NA
chr10	3797776	3798248	473	*	1470	ENSG00000229672	3793259	3805418	+	inside	4517	4517	NearestLocation	NA
chr10	3869654	3870093	440	*	1471	ENSG00000230573	3876142	3876920	+	upstream	-6488	6049	NearestLocation	LINC02639
chr10	3880069	3880296	228	*	1472	ENSG00000230573	3876142	3876920	+	downstream	3927	3149	NearestLocation	LINC02639
chr10	3954020	3954320	301	*	1473	ENSG00000226005	3976711	3978005	+	upstream	-22691	22391	NearestLocation	NA
chr10	4108956	4109155	200	*	1474	ENSG00000236990	4093918	4131205	+	inside	15038	15038	NearestLocation	LOC101927964
chr10	4125599	4126039	441	*	1475	ENSG00000236990	4093918	4131205	+	inside	31681	5166	NearestLocation	LOC101927964
chr10	4704094	4704440	347	*	1476	ENSG00000225269	4697619	4704611	+	inside	6475	171	NearestLocation	LINC00705
chr10	4705364	4705640	277	*	1477	ENSG00000225269	4697619	4704611	+	downstream	7745	753	NearestLocation	LINC00705
chr10	4909699	4910165	467	*	1478	ENSG00000151631	4914093	4934167	-	downstream	24468	3928	NearestLocation	NA
chr10	4945480	4945957	478	*	1479	ENSG00000187134	4934796	5025475	+	inside	10684	10684	NearestLocation	AKR1C1
[truncated: 13,582 more rows]

## Sheet: GATA4_ChIP_day20
seqnames	start	end	width	strand	peak	feature	start_position	end_position	feature_strand	insideFeature	distancetoFeature	shortestDistance	fromOverlappingOrNearest	symbol
[truncated: 6,812 more rows]
